# Supplementary material
Source: publisher figshare collection journal article supplement (https://acs.figshare.com/ndownloader/files/7440502)
Supplement: Supplementary file 1 [file 7440502]

 
data_o365asb
 
_audit_creation_method            'SHELXL-2014/7'
_shelx_SHELXL_version_number      '2014/7'
_chemical_name_systematic         ?
_chemical_name_common             ?
_chemical_melting_point           ?
_chemical_formula_moiety          ?
_chemical_formula_sum
 'C194 H409 Dy6 Fe18 N43 O105' 
_chemical_formula_weight          7004.92

loop_
 _atom_type_symbol
 _atom_type_description
 _atom_type_scat_dispersion_real
 _atom_type_scat_dispersion_imag
 _atom_type_scat_source
 'C'  'C'   0.0033   0.0016
 'International Tables Vol C Tables 4.2.6.8 and 6.1.1.4'
 'H'  'H'   0.0000   0.0000
 'International Tables Vol C Tables 4.2.6.8 and 6.1.1.4'
 'N'  'N'   0.0061   0.0033
 'International Tables Vol C Tables 4.2.6.8 and 6.1.1.4'
 'O'  'O'   0.0106   0.0060
 'International Tables Vol C Tables 4.2.6.8 and 6.1.1.4'
 'Fe'  'Fe'   0.3463   0.8444
 'International Tables Vol C Tables 4.2.6.8 and 6.1.1.4'
 'Dy'  'Dy'  -0.1892   4.4098
 'International Tables Vol C Tables 4.2.6.8 and 6.1.1.4'
 
_space_group_crystal_system       triclinic
_space_group_IT_number            2
_space_group_name_H-M_alt         'P -1'
_space_group_name_Hall            '-P 1'
 
_shelx_space_group_comment
;
The symmetry employed for this shelxl refinement is uniquely defined
by the following loop, which should always be used as a source of
symmetry information in preference to the above space-group names.
They are only intended as comments.
;
 
loop_
 _space_group_symop_operation_xyz
 'x, y, z'
 '-x, -y, -z'
 
_cell_length_a                    15.3106(15)
_cell_length_b                    23.090(2)
_cell_length_c                    24.293(2)
_cell_angle_alpha                 78.069(3)
_cell_angle_beta                  81.833(3)
_cell_angle_gamma                 76.573(3)
_cell_volume                      8132.8(14)
_cell_formula_units_Z             1
_cell_measurement_temperature     100(2)
_cell_measurement_reflns_used     9912
_cell_measurement_theta_min       2.31
_cell_measurement_theta_max       22.87
 
_exptl_crystal_description        block 
_exptl_crystal_colour             yellow 
_exptl_crystal_density_meas       ?
_exptl_crystal_density_method     ?
_exptl_crystal_density_diffrn     1.430          
_exptl_crystal_F_000              3578
_exptl_transmission_factor_min    ?
_exptl_transmission_factor_max    ?
_exptl_crystal_size_max           0.280
_exptl_crystal_size_mid           0.270
_exptl_crystal_size_min           0.160
_exptl_absorpt_coefficient_mu     2.213
_shelx_estimated_absorpt_T_min    0.576
_shelx_estimated_absorpt_T_max    0.718
_exptl_absorpt_correction_type    'multi scan'
_exptl_absorpt_correction_T_min   0.565
_exptl_absorpt_correction_T_max   0.709
_exptl_absorpt_process_details    'sadabs'
_exptl_absorpt_special_details    ?
_diffrn_ambient_temperature       100(2)
_diffrn_radiation_wavelength      0.71073
_diffrn_radiation_type            MoK\a
_diffrn_source                    ?
_diffrn_measurement_device_type   'Bruker APEX-II CCD'
_diffrn_measurement_method        '\f and \w scans'
_diffrn_detector_area_resol_mean  ?
_diffrn_reflns_number             86968
_diffrn_reflns_av_unetI/netI      0.1147
_diffrn_reflns_av_R_equivalents   0.1051
_diffrn_reflns_limit_h_min        -17
_diffrn_reflns_limit_h_max        17
_diffrn_reflns_limit_k_min        -26
_diffrn_reflns_limit_k_max        26
_diffrn_reflns_limit_l_min        -28
_diffrn_reflns_limit_l_max        28
_diffrn_reflns_theta_min          1.486
_diffrn_reflns_theta_max          24.407
_diffrn_reflns_theta_full         24.407
_diffrn_measured_fraction_theta_max   0.999
_diffrn_measured_fraction_theta_full  0.999
_diffrn_reflns_Laue_measured_fraction_max    0.999
_diffrn_reflns_Laue_measured_fraction_full   0.999
_diffrn_reflns_point_group_measured_fraction_max   0.999
_diffrn_reflns_point_group_measured_fraction_full  0.999
_reflns_number_total              26768
_reflns_number_gt                 16655
_reflns_threshold_expression      'I > 2\s(I)'
_reflns_Friedel_coverage          0.000
_reflns_Friedel_fraction_max      .
_reflns_Friedel_fraction_full     .
 
_reflns_special_details
;
 Reflections were merged by SHELXL according to the crystal
 class for the calculation of statistics and refinement.
 
 _reflns_Friedel_fraction is defined as the number of unique
 Friedel pairs measured divided by the number that would be
 possible theoretically, ignoring centric projections and
 systematic absences.
;
 
_computing_data_collection        'Bruker APEX2' 
_computing_cell_refinement        'Bruker SAINT'
_computing_data_reduction         'Bruker SAINT'
_computing_structure_solution     'SHELXS-97 (Sheldrick, 2008)'
_computing_structure_refinement 'SHELXL-2014/7 (Sheldrick, 2014)'
_computing_molecular_graphics     'Bruker SHELXTL' 
_computing_publication_material   'Bruker SHELXTL'
_refine_special_details           ?
_refine_ls_structure_factor_coef  Fsqd
_refine_ls_matrix_type            full
_refine_ls_weighting_scheme       calc
_refine_ls_weighting_details
'w=1/[\s^2^(Fo^2^)+(0.1200P)^2^+59.5952P] where P=(Fo^2^+2Fc^2^)/3'
_atom_sites_solution_primary      ?
_atom_sites_solution_secondary    ?
_atom_sites_solution_hydrogens    mixed
_refine_ls_hydrogen_treatment     constr
_refine_ls_extinction_method      none
_refine_ls_extinction_coef        .
_refine_ls_number_reflns          26768
_refine_ls_number_parameters      1766
_refine_ls_number_restraints      642
_refine_ls_R_factor_all           0.1287
_refine_ls_R_factor_gt            0.0763
_refine_ls_wR_factor_ref          0.2459
_refine_ls_wR_factor_gt           0.2064
_refine_ls_goodness_of_fit_ref    1.009
_refine_ls_restrained_S_all       1.005
_refine_ls_shift/su_max           0.006
_refine_ls_shift/su_mean          0.000
 
loop_
 _atom_site_label
 _atom_site_type_symbol
 _atom_site_fract_x
 _atom_site_fract_y
 _atom_site_fract_z
 _atom_site_U_iso_or_equiv
 _atom_site_adp_type
 _atom_site_occupancy
 _atom_site_site_symmetry_order  
 _atom_site_calc_flag
 _atom_site_refinement_flags_posn
 _atom_site_refinement_flags_adp
 _atom_site_refinement_flags_occupancy
 _atom_site_disorder_assembly
 _atom_site_disorder_group
Dy1 Dy 0.37780(5) 0.58564(3) 0.34363(3) 0.04611(19) Uani 1 1 d . . . . .
Dy2 Dy 0.80242(4) 0.91631(3) 0.44560(3) 0.04416(19) Uani 1 1 d . . . . .
Dy3 Dy 0.91386(4) 1.34749(2) 0.10008(2) 0.03542(17) Uani 1 1 d . . . . .
Fe1 Fe 0.26149(13) 0.58974(7) 0.23506(7) 0.0410(4) Uani 1 1 d . . . . .
Fe2 Fe 0.52472(13) 0.68418(7) 0.31391(8) 0.0410(4) Uani 1 1 d . . . . .
Fe3 Fe 0.54424(11) 0.77467(7) 0.39312(7) 0.0326(4) Uani 1 1 d . . . . .
Fe4 Fe 0.71888(11) 0.79705(7) 0.43410(7) 0.0348(4) Uani 1 1 d . . . . .
Fe5 Fe 0.73582(12) 1.04577(7) 0.34540(7) 0.0336(4) Uani 1 1 d D . . . .
Fe6 Fe 0.87644(11) 1.11413(7) 0.26246(7) 0.0349(4) Uani 1 1 d . . . . .
Fe7 Fe 0.88167(12) 1.25308(7) 0.22323(7) 0.0372(4) Uani 1 1 d . . . . .
Fe8 Fe 0.86885(14) 1.29834(8) -0.01738(7) 0.0440(5) Uani 1 1 d . . . . .
Fe9 Fe 0.72400(13) 1.37797(7) -0.10145(7) 0.0405(4) Uani 1 1 d . . . . .
C1 C 0.2444(12) 0.4905(7) 0.3338(6) 0.065(4) Uani 1 1 d . U . . .
C2 C 0.2012(12) 0.4404(7) 0.3635(6) 0.068(4) Uani 1 1 d . U . . .
H2 H 0.2037 0.4128 0.3363 0.082 Uiso 1 1 calc R U . . .
C3 C 0.2489(17) 0.4037(9) 0.4137(9) 0.136(9) Uani 1 1 d . U . . .
H3A H 0.2090 0.4083 0.4485 0.204 Uiso 1 1 calc R U . . .
H3B H 0.3039 0.4179 0.4150 0.204 Uiso 1 1 calc R U . . .
H3C H 0.2647 0.3609 0.4101 0.204 Uiso 1 1 calc R U . . .
C4 C 0.1002(15) 0.4655(8) 0.3814(9) 0.106(6) Uani 1 1 d . U . . .
H4A H 0.0957 0.4913 0.4095 0.159 Uiso 1 1 calc R U . . .
H4B H 0.0704 0.4317 0.3979 0.159 Uiso 1 1 calc R U . . .
H4C H 0.0708 0.4893 0.3482 0.159 Uiso 1 1 calc R U . . .
C5 C 0.2675(15) 0.5845(11) 0.4727(10) 0.105(6) Uani 1 1 d D U . . .
C6 C 0.1830(15) 0.6122(10) 0.5051(8) 0.120(7) Uani 1 1 d D U . . .
H6 H 0.1720 0.6574 0.4945 0.145 Uiso 1 1 calc R U . . .
C7 C 0.1076(15) 0.5889(13) 0.4857(12) 0.157(10) Uani 1 1 d D U . . .
H7A H 0.1330 0.5661 0.4552 0.235 Uiso 1 1 calc R U . . .
H7B H 0.0603 0.6234 0.4719 0.235 Uiso 1 1 calc R U . . .
H7C H 0.0817 0.5625 0.5176 0.235 Uiso 1 1 calc R U . . .
C8 C 0.205(2) 0.5918(13) 0.5689(9) 0.166(10) Uani 1 1 d D U . . .
H8A H 0.1956 0.6275 0.5865 0.248 Uiso 1 1 calc R U . . .
H8B H 0.2674 0.5696 0.5704 0.248 Uiso 1 1 calc R U . . .
H8C H 0.1642 0.5654 0.5893 0.248 Uiso 1 1 calc R U . . .
C9 C 0.8158(10) 0.7802(7) 0.5347(7) 0.064(4) Uani 1 1 d . U . . .
C10 C 0.8587(13) 0.7367(8) 0.5854(7) 0.096(5) Uani 1 1 d D U . . .
H10 H 0.8665 0.6948 0.5778 0.116 Uiso 1 1 calc R U . . .
C11 C 0.9513(14) 0.7460(12) 0.5892(10) 0.155(10) Uani 1 1 d D U . . .
H11A H 0.9463 0.7833 0.6038 0.233 Uiso 1 1 calc R U . . .
H11B H 0.9848 0.7493 0.5516 0.233 Uiso 1 1 calc R U . . .
H11C H 0.9835 0.7115 0.6147 0.233 Uiso 1 1 calc R U . . .
C12 C 0.7856(18) 0.7434(13) 0.6338(10) 0.175(10) Uani 1 1 d D U . . .
H12A H 0.7975 0.7081 0.6641 0.263 Uiso 1 1 calc R U . . .
H12B H 0.7269 0.7462 0.6205 0.263 Uiso 1 1 calc R U . . .
H12C H 0.7849 0.7801 0.6482 0.263 Uiso 1 1 calc R U . . .
C13 C 1.0215(15) 0.8924(11) 0.4605(11) 0.118(6) Uani 1 1 d D U . . .
C14 C 1.1128(17) 0.8549(12) 0.4412(13) 0.151(8) Uani 1 1 d D U . . .
H14 H 1.1615 0.8639 0.4595 0.181 Uiso 1 1 calc R U . . .
C15 C 1.1365(13) 0.8662(11) 0.3740(11) 0.137(8) Uani 1 1 d . U . . .
H15A H 1.1955 0.8409 0.3645 0.205 Uiso 1 1 calc R U . . .
H15B H 1.0903 0.8556 0.3562 0.205 Uiso 1 1 calc R U . . .
H15C H 1.1383 0.9089 0.3603 0.205 Uiso 1 1 calc R U . . .
C16 C 1.1247(14) 0.7787(12) 0.4485(10) 0.177(9) Uani 1 1 d . U . . .
H16A H 1.1863 0.7609 0.4344 0.212 Uiso 1 1 calc R U . . .
H16B H 1.1131 0.7612 0.4885 0.212 Uiso 1 1 calc R U . . .
H16C H 1.0816 0.7700 0.4267 0.212 Uiso 1 1 calc R U . . .
C17 C 0.9665(9) 1.3532(5) 0.2301(6) 0.042(3) Uani 1 1 d . U . . .
C18 C 0.9938(11) 1.3915(6) 0.2652(6) 0.060(4) Uani 1 1 d . U . . .
H18 H 1.0022 1.3672 0.3039 0.072 Uiso 1 1 calc R U . . .
C19 C 0.9172(15) 1.4441(9) 0.2696(10) 0.125(8) Uani 1 1 d . U . . .
H19A H 0.9242 1.4638 0.3003 0.188 Uiso 1 1 calc R U . . .
H19B H 0.8602 1.4301 0.2774 0.188 Uiso 1 1 calc R U . . .
H19C H 0.9167 1.4732 0.2339 0.188 Uiso 1 1 calc R U . . .
C20 C 1.0797(13) 1.4095(8) 0.2408(8) 0.091(5) Uani 1 1 d . U . . .
H20A H 1.1268 1.3732 0.2375 0.137 Uiso 1 1 calc R U . . .
H20B H 1.0971 1.4327 0.2654 0.137 Uiso 1 1 calc R U . . .
H20C H 1.0721 1.4345 0.2032 0.137 Uiso 1 1 calc R U . . .
C21 C 0.8271(10) 1.4960(6) 0.0997(5) 0.045(3) Uani 1 1 d . U . . .
C22 C 0.7458(9) 1.5385(6) 0.1222(6) 0.058(3) Uani 1 1 d D U . . .
H22 H 0.7386 1.5280 0.1644 0.070 Uiso 1 1 calc R U . . .
C23 C 0.7552(14) 1.6044(8) 0.1045(12) 0.135(10) Uani 1 1 d . U . . .
H23A H 0.7319 1.6212 0.0677 0.203 Uiso 1 1 calc R U . . .
H23B H 0.8190 1.6064 0.1018 0.203 Uiso 1 1 calc R U . . .
H23C H 0.7207 1.6278 0.1328 0.203 Uiso 1 1 calc R U . . .
C24 C 0.6640(10) 1.5335(8) 0.1001(8) 0.092(6) Uani 1 1 d D U . . .
H24A H 0.6622 1.5551 0.0610 0.138 Uiso 1 1 calc R U . . .
H24B H 0.6107 1.5513 0.1233 0.138 Uiso 1 1 calc R U . . .
H24C H 0.6644 1.4907 0.1015 0.138 Uiso 1 1 calc R U . . .
C25 C 0.0905(10) 0.6387(7) 0.2962(6) 0.058(4) Uani 1 1 d . U . . .
H25A H 0.0849 0.5997 0.3211 0.069 Uiso 1 1 calc R U . . .
H25B H 0.0314 0.6672 0.2992 0.069 Uiso 1 1 calc R U . . .
C26 C 0.1616(10) 0.6638(6) 0.3153(5) 0.054(4) Uani 1 1 d . U . . .
H26A H 0.1536 0.7077 0.2997 0.065 Uiso 1 1 calc R U . . .
H26B H 0.1548 0.6586 0.3571 0.065 Uiso 1 1 calc R U . . .
C27 C 0.1051(10) 0.6886(6) 0.1950(5) 0.051(3) Uani 1 1 d . U . . .
H27A H 0.0829 0.6831 0.1604 0.061 Uiso 1 1 calc R U . . .
H27B H 0.0594 0.7198 0.2117 0.061 Uiso 1 1 calc R U . . .
C28 C 0.1916(9) 0.7103(5) 0.1791(5) 0.046(3) Uani 1 1 d . U . . .
H28A H 0.1869 0.7415 0.1444 0.055 Uiso 1 1 calc R U . . .
H28B H 0.2043 0.7284 0.2098 0.055 Uiso 1 1 calc R U . . .
C29 C 0.0654(9) 0.5884(6) 0.2209(6) 0.051(3) Uani 1 1 d . U . . .
H29A H 0.0927 0.5795 0.1833 0.061 Uiso 1 1 calc R U . . .
H29B H 0.0765 0.5498 0.2482 0.061 Uiso 1 1 calc R U . . .
C30 C -0.0319(11) 0.6077(8) 0.2184(7) 0.071(4) Uani 1 1 d . U . . .
H30A H -0.0467 0.6504 0.1990 0.085 Uiso 1 1 calc R U . . .
H30B H -0.0525 0.5825 0.1965 0.085 Uiso 1 1 calc R U . . .
C31 C 0.3703(8) 0.7437(5) 0.2417(5) 0.039(3) Uani 1 1 d . U . . .
H31A H 0.3474 0.7140 0.2266 0.046 Uiso 1 1 calc R U . . .
H31B H 0.3435 0.7847 0.2220 0.046 Uiso 1 1 calc R U . . .
C32 C 0.3417(8) 0.7384(5) 0.3045(5) 0.040(3) Uani 1 1 d . U . . .
H32A H 0.3500 0.7742 0.3180 0.048 Uiso 1 1 calc R U . . .
H32B H 0.2771 0.7362 0.3123 0.048 Uiso 1 1 calc R U . . .
C33 C 0.5076(10) 0.7892(5) 0.2167(5) 0.048(3) Uani 1 1 d . U . . .
H33A H 0.5723 0.7786 0.2030 0.057 Uiso 1 1 calc R U . . .
H33B H 0.4761 0.8185 0.1862 0.057 Uiso 1 1 calc R U . . .
C34 C 0.4976(9) 0.8181(5) 0.2683(5) 0.045(3) Uani 1 1 d . U . . .
H34A H 0.5385 0.8468 0.2626 0.054 Uiso 1 1 calc R U . . .
H34B H 0.4348 0.8407 0.2750 0.054 Uiso 1 1 calc R U . . .
C35 C 0.5016(10) 0.6965(6) 0.1844(5) 0.053(3) Uani 1 1 d . U . . .
H35A H 0.4821 0.6573 0.1959 0.063 Uiso 1 1 calc R U . . .
H35B H 0.5684 0.6876 0.1800 0.063 Uiso 1 1 calc R U . . .
C36 C 0.4681(10) 0.7273(6) 0.1278(6) 0.061(4) Uani 1 1 d . U . . .
H36A H 0.4014 0.7348 0.1310 0.073 Uiso 1 1 calc R U . . .
H36B H 0.4864 0.7668 0.1158 0.073 Uiso 1 1 calc R U . . .
C37 C 0.7684(8) 0.7189(5) 0.3441(5) 0.044(3) Uani 1 1 d . U . . .
H37A H 0.7265 0.6907 0.3516 0.052 Uiso 1 1 calc R U . . .
H37B H 0.8178 0.7049 0.3158 0.052 Uiso 1 1 calc R U . . .
C38 C 0.7184(9) 0.7823(5) 0.3207(5) 0.043(3) Uani 1 1 d . U . . .
H38A H 0.7619 0.8089 0.3065 0.052 Uiso 1 1 calc R U . . .
H38B H 0.6856 0.7810 0.2888 0.052 Uiso 1 1 calc R U . . .
C39 C 0.8972(9) 0.7304(6) 0.3872(8) 0.084(5) Uani 1 1 d D U . . .
H39A H 0.9267 0.7183 0.3511 0.101 Uiso 1 1 calc R U . . .
H39B H 0.9323 0.7047 0.4179 0.101 Uiso 1 1 calc R U . . .
C40 C 0.9010(10) 0.7939(6) 0.3852(12) 0.125(8) Uani 1 1 d D U . . .
H40A H 0.9478 0.7942 0.4092 0.150 Uiso 1 1 calc R U . . .
H40B H 0.9215 0.8108 0.3459 0.150 Uiso 1 1 calc R U . . .
C41 C 0.8032(11) 0.6601(6) 0.4353(7) 0.073(5) Uani 1 1 d . U . . .
H41A H 0.7396 0.6610 0.4508 0.087 Uiso 1 1 calc R U . . .
H41B H 0.8372 0.6587 0.4674 0.087 Uiso 1 1 calc R U . . .
C42 C 0.8377(11) 0.6022(7) 0.4143(9) 0.094(6) Uani 1 1 d . U . . .
H42A H 0.8318 0.5681 0.4458 0.113 Uiso 1 1 calc R U . . .
H42B H 0.8005 0.6004 0.3848 0.113 Uiso 1 1 calc R U . . .
C43 C 0.7190(8) 0.9408(5) 0.2924(5) 0.037(3) Uani 1 1 d . U . . .
H43A H 0.7186 0.9337 0.2537 0.045 Uiso 1 1 calc R U . . .
H43B H 0.6960 0.9081 0.3195 0.045 Uiso 1 1 calc R U . . .
C44 C 0.8161(8) 0.9395(5) 0.3031(5) 0.043(3) Uani 1 1 d . U . . .
H44A H 0.8510 0.8972 0.3088 0.052 Uiso 1 1 calc R U . . .
H44B H 0.8458 0.9630 0.2700 0.052 Uiso 1 1 calc R U . . .
C45 C 0.6458(10) 1.0433(6) 0.2438(5) 0.050(3) Uani 1 1 d . U . . .
H45A H 0.6288 1.0227 0.2163 0.060 Uiso 1 1 calc R U . . .
H45B H 0.5964 1.0785 0.2495 0.060 Uiso 1 1 calc R U . . .
C46 C 0.7302(9) 1.0641(5) 0.2217(5) 0.049(3) Uani 1 1 d . U . . .
H46A H 0.7720 1.0328 0.2030 0.059 Uiso 1 1 calc R U . . .
H46B H 0.7168 1.1015 0.1931 0.059 Uiso 1 1 calc R U . . .
C47 C 0.5726(8) 0.9920(5) 0.3302(5) 0.041(3) Uani 1 1 d . U . . .
H47A H 0.5383 1.0317 0.3386 0.050 Uiso 1 1 calc R U . . .
H47B H 0.5843 0.9648 0.3668 0.050 Uiso 1 1 calc R U . . .
C48 C 0.5143(9) 0.9665(6) 0.3005(6) 0.046(3) Uani 1 1 d . U . . .
H48A H 0.4973 0.9952 0.2656 0.055 Uiso 1 1 calc R U . . .
H48B H 0.5493 0.9281 0.2896 0.055 Uiso 1 1 calc R U . . .
C49 C 0.7001(9) 1.2413(6) 0.2886(6) 0.054(3) Uani 1 1 d . U . . .
H49A H 0.6377 1.2654 0.2922 0.064 Uiso 1 1 calc R U . . .
H49B H 0.7070 1.2082 0.3219 0.064 Uiso 1 1 calc R U . . .
C50 C 0.7150(8) 1.2139(5) 0.2351(5) 0.041(3) Uani 1 1 d . U . . .
H50A H 0.6819 1.1807 0.2408 0.050 Uiso 1 1 calc R U . . .
H50B H 0.6915 1.2452 0.2031 0.050 Uiso 1 1 calc R U . . .
C51 C 0.7310(9) 1.3447(5) 0.2651(5) 0.049(3) Uani 1 1 d . U . . .
H51A H 0.7684 1.3694 0.2760 0.059 Uiso 1 1 calc R U . . .
H51B H 0.6682 1.3576 0.2815 0.059 Uiso 1 1 calc R U . . .
C52 C 0.7335(9) 1.3559(5) 0.2024(5) 0.048(3) Uani 1 1 d . U . . .
H52A H 0.6788 1.3464 0.1920 0.058 Uiso 1 1 calc R U . . .
H52B H 0.7321 1.3994 0.1877 0.058 Uiso 1 1 calc R U . . .
C53 C 0.7946(10) 1.2749(6) 0.3427(5) 0.066(4) Uani 1 1 d D U . . .
H53A H 0.8303 1.3062 0.3403 0.080 Uiso 0.629(14) 1 calc R U P A 1
H53B H 0.8360 1.2350 0.3509 0.080 Uiso 0.629(14) 1 calc R U P A 1
H53C H 0.7460 1.3025 0.3618 0.080 Uiso 0.371(14) 1 calc R U P A 2
H53D H 0.8464 1.2954 0.3342 0.080 Uiso 0.371(14) 1 calc R U P A 2
C54 C 0.7217(13) 1.2805(9) 0.3931(7) 0.095(9) Uani 0.629(14) 1 d D U P A 1
H54A H 0.6853 1.2494 0.3966 0.114 Uiso 0.629(14) 1 calc R U P A 1
H54B H 0.7507 1.2736 0.4285 0.114 Uiso 0.629(14) 1 calc R U P A 1
C54' C 0.8242(15) 1.2219(7) 0.3908(6) 0.079(10) Uani 0.371(14) 1 d D U P A 2
H54C H 0.7883 1.1925 0.3875 0.095 Uiso 0.371(14) 1 calc R U P A 2
H54D H 0.8866 1.2046 0.3765 0.095 Uiso 0.371(14) 1 calc R U P A 2
C55 C 0.7597(11) 1.2336(6) 0.0835(6) 0.074(5) Uani 1 1 d . U . . .
H55A H 0.7053 1.2160 0.0881 0.088 Uiso 1 1 calc R U . . .
H55B H 0.7898 1.2192 0.1188 0.088 Uiso 1 1 calc R U . . .
C56 C 0.7329(11) 1.3002(7) 0.0735(6) 0.064(4) Uani 1 1 d . U . . .
H56A H 0.6866 1.3135 0.0464 0.077 Uiso 1 1 calc R U . . .
H56B H 0.7057 1.3135 0.1095 0.077 Uiso 1 1 calc R U . . .
C57 C 0.7752(12) 1.1957(6) -0.0067(6) 0.077(5) Uani 1 1 d . U . . .
H57A H 0.7389 1.1661 0.0139 0.092 Uiso 1 1 calc R U . . .
H57B H 0.8197 1.1757 -0.0343 0.092 Uiso 1 1 calc R U . . .
C58 C 0.7148(12) 1.2483(6) -0.0376(5) 0.063(4) Uani 1 1 d . U . . .
H58A H 0.6996 1.2378 -0.0721 0.076 Uiso 1 1 calc R U . . .
H58B H 0.6580 1.2594 -0.0134 0.076 Uiso 1 1 calc R U . . .
C59 C 0.9026(13) 1.1627(6) 0.0527(6) 0.090(6) Uani 1 1 d D U . . .
H59A H 0.9344 1.1744 0.0801 0.108 Uiso 0.561(15) 1 calc R U P B 1
H59B H 0.9460 1.1529 0.0199 0.108 Uiso 0.561(15) 1 calc R U P B 1
H59C H 0.9112 1.1690 0.0905 0.108 Uiso 0.439(15) 1 calc R U P B 2
H59D H 0.9552 1.1736 0.0273 0.108 Uiso 0.439(15) 1 calc R U P B 2
C60 C 0.8590(15) 1.1094(9) 0.0803(11) 0.072(7) Uani 0.561(15) 1 d D U P B 1
H60A H 0.8090 1.1214 0.1090 0.087 Uiso 0.561(15) 1 calc R U P B 1
H60B H 0.8351 1.0941 0.0516 0.087 Uiso 0.561(15) 1 calc R U P B 1
C60' C 0.917(3) 1.0945(10) 0.0582(12) 0.072(7) Uani 0.439(15) 1 d D U P B 2
H60C H 0.9034 1.0829 0.0239 0.087 Uiso 0.439(15) 1 calc R U P B 2
H60D H 0.9796 1.0740 0.0664 0.087 Uiso 0.439(15) 1 calc R U P B 2
C61 C 0.5926(12) 0.4989(6) 0.3154(8) 0.079(5) Uani 1 1 d . U . . .
H61A H 0.6111 0.5096 0.2745 0.095 Uiso 1 1 calc R U . . .
H61B H 0.6353 0.4618 0.3309 0.095 Uiso 1 1 calc R U . . .
C62 C 0.5976(10) 0.5496(6) 0.3442(8) 0.078(5) Uani 1 1 d . U . . .
H62A H 0.5938 0.5358 0.3857 0.094 Uiso 1 1 calc R U . . .
H62B H 0.6556 0.5626 0.3318 0.094 Uiso 1 1 calc R U . . .
C63 C 0.4841(15) 0.4392(7) 0.3693(8) 0.106(7) Uani 1 1 d . U . . .
H63A H 0.5322 0.4028 0.3661 0.127 Uiso 1 1 calc R U . . .
H63B H 0.4257 0.4288 0.3669 0.127 Uiso 1 1 calc R U . . .
C64 C 0.4829(13) 0.4569(6) 0.4264(8) 0.106(6) Uani 1 1 d . U . . .
H64A H 0.4511 0.4306 0.4561 0.128 Uiso 1 1 calc R U . . .
H64B H 0.5455 0.4510 0.4359 0.128 Uiso 1 1 calc R U . . .
C65 C 0.4763(12) 0.4721(6) 0.2705(7) 0.087(6) Uani 1 1 d . U . . .
H65A H 0.5277 0.4432 0.2549 0.105 Uiso 1 1 calc R U . . .
H65B H 0.4232 0.4529 0.2792 0.105 Uiso 1 1 calc R U . . .
C66 C 0.4561(11) 0.5288(6) 0.2282(8) 0.077(5) Uani 1 1 d . U . . .
H66A H 0.5108 0.5461 0.2172 0.093 Uiso 1 1 calc R U . . .
H66B H 0.4380 0.5198 0.1938 0.093 Uiso 1 1 calc R U . . .
C67 C 0.4738(9) 0.7537(6) 0.5168(5) 0.053(3) Uani 1 1 d . U . . .
H67A H 0.4477 0.7278 0.5498 0.064 Uiso 1 1 calc R U . . .
H67B H 0.4507 0.7964 0.5212 0.064 Uiso 1 1 calc R U . . .
C68 C 0.5755(9) 0.7388(6) 0.5160(5) 0.049(3) Uani 1 1 d . U . . .
H68A H 0.5937 0.7578 0.5443 0.059 Uiso 1 1 calc R U . . .
H68B H 0.5973 0.6945 0.5257 0.059 Uiso 1 1 calc R U . . .
C69 C 0.3602(8) 0.7846(5) 0.4512(5) 0.038(3) Uani 1 1 d . U . . .
H69A H 0.3159 0.7838 0.4851 0.046 Uiso 1 1 calc R U . . .
H69B H 0.3353 0.7718 0.4213 0.046 Uiso 1 1 calc R U . . .
C70 C 0.3776(8) 0.8472(5) 0.4311(5) 0.044(3) Uani 1 1 d . U . . .
H70A H 0.3272 0.8724 0.4098 0.053 Uiso 1 1 calc R U . . .
H70B H 0.3791 0.8655 0.4643 0.053 Uiso 1 1 calc R U . . .
C71 C 0.4460(10) 0.6797(6) 0.4656(6) 0.054(3) Uani 1 1 d . U . . .
H71A H 0.3975 0.6769 0.4440 0.065 Uiso 1 1 calc R U . . .
H71B H 0.4337 0.6595 0.5052 0.065 Uiso 1 1 calc R U . . .
C72 C 0.5360(10) 0.6471(6) 0.4406(6) 0.060(4) Uani 1 1 d . U . . .
H72A H 0.5820 0.6388 0.4676 0.072 Uiso 1 1 calc R U . . .
H72B H 0.5302 0.6081 0.4321 0.072 Uiso 1 1 calc R U . . .
C73 C 0.7300(14) 0.9396(9) 0.5806(6) 0.094(6) Uani 1 1 d . U . . .
H73A H 0.7532 0.8959 0.5937 0.112 Uiso 1 1 calc R U . . .
H73B H 0.6876 0.9555 0.6114 0.112 Uiso 1 1 calc R U . . .
C74 C 0.8080(11) 0.9723(9) 0.5673(6) 0.118(8) Uani 1 1 d . U . . .
H74A H 0.7850 1.0162 0.5663 0.141 Uiso 1 1 calc R U . . .
H74B H 0.8501 0.9569 0.5969 0.141 Uiso 1 1 calc R U . . .
C75 C 0.6301(12) 1.0091(6) 0.5138(5) 0.063(4) Uani 1 1 d . U . . .
H75A H 0.6137 1.0281 0.5479 0.076 Uiso 1 1 calc R U . . .
H75B H 0.5735 1.0075 0.4995 0.076 Uiso 1 1 calc R U . . .
C76 C 0.6825(10) 1.0484(6) 0.4685(5) 0.061(4) Uani 1 1 d . U . . .
H76A H 0.6412 1.0859 0.4524 0.073 Uiso 1 1 calc R U . . .
H76B H 0.7298 1.0599 0.4854 0.073 Uiso 1 1 calc R U . . .
C77 C 0.6192(11) 0.9046(7) 0.5409(5) 0.060(4) Uani 1 1 d . U . . .
H77A H 0.5638 0.9205 0.5642 0.072 Uiso 1 1 calc R U . . .
H77B H 0.6493 0.8653 0.5621 0.072 Uiso 1 1 calc R U . . .
C78 C 0.5950(10) 0.8957(6) 0.4858(5) 0.052(3) Uani 1 1 d . U . . .
H78A H 0.5586 0.8641 0.4932 0.063 Uiso 1 1 calc R U . . .
H78B H 0.5580 0.9338 0.4671 0.063 Uiso 1 1 calc R U . . .
C79 C 1.0664(10) 1.0996(7) 0.2926(7) 0.082(5) Uani 1 1 d . U . . .
H79A H 1.1102 1.0840 0.3212 0.098 Uiso 1 1 calc R U . . .
H79B H 1.1007 1.0991 0.2549 0.098 Uiso 1 1 calc R U . . .
C80 C 1.0222(10) 1.1630(7) 0.2971(6) 0.071(4) Uani 1 1 d . U . . .
H80A H 1.0088 1.1669 0.3374 0.085 Uiso 1 1 calc R U . . .
H80B H 1.0631 1.1904 0.2787 0.085 Uiso 1 1 calc R U . . .
C81 C 0.9744(11) 1.0374(10) 0.3610(8) 0.119(8) Uani 1 1 d . U . . .
H81A H 0.9622 0.9963 0.3656 0.143 Uiso 1 1 calc R U . . .
H81B H 1.0252 1.0343 0.3833 0.143 Uiso 1 1 calc R U . . .
C82 C 0.8948(12) 1.0766(8) 0.3840(7) 0.098(6) Uani 1 1 d . U . . .
H82A H 0.8699 1.0548 0.4201 0.117 Uiso 1 1 calc R U . . .
H82B H 0.9118 1.1128 0.3918 0.117 Uiso 1 1 calc R U . . .
C83 C 1.0323(13) 1.0107(8) 0.2691(11) 0.112(8) Uani 1 1 d . U . . .
H83A H 0.9948 0.9799 0.2816 0.134 Uiso 1 1 calc R U . . .
H83B H 1.0958 0.9910 0.2750 0.134 Uiso 1 1 calc R U . . .
C84 C 1.0244(13) 1.0376(8) 0.2068(9) 0.106(7) Uani 1 1 d . U . . .
H84A H 1.0748 1.0583 0.1914 0.128 Uiso 1 1 calc R U . . .
H84B H 1.0279 1.0050 0.1853 0.128 Uiso 1 1 calc R U . . .
C85 C 1.1314(10) 1.3577(6) 0.0923(7) 0.060(4) Uani 1 1 d . U . . .
H85A H 1.1971 1.3467 0.0817 0.072 Uiso 1 1 calc R U . . .
H85B H 1.1226 1.3631 0.1322 0.072 Uiso 1 1 calc R U . . .
C86 C 1.0955(8) 1.4157(6) 0.0572(7) 0.064(4) Uani 1 1 d . U . . .
H86A H 1.1262 1.4174 0.0183 0.076 Uiso 1 1 calc R U . . .
H86B H 1.1068 1.4493 0.0729 0.076 Uiso 1 1 calc R U . . .
C87 C 1.1122(9) 1.2562(6) 0.1352(6) 0.052(3) Uani 1 1 d . U . . .
H87A H 1.1111 1.2714 0.1705 0.062 Uiso 1 1 calc R U . . .
H87B H 1.1738 1.2326 0.1267 0.062 Uiso 1 1 calc R U . . .
C88 C 1.0458(9) 1.2154(6) 0.1438(6) 0.051(3) Uani 1 1 d . U . . .
H88A H 1.0514 1.1960 0.1104 0.061 Uiso 1 1 calc R U . . .
H88B H 1.0583 1.1831 0.1773 0.061 Uiso 1 1 calc R U . . .
C89 C 1.1194(10) 1.2890(6) 0.0327(6) 0.055(3) Uani 1 1 d . U . . .
H89A H 1.1254 1.2447 0.0380 0.066 Uiso 1 1 calc R U . . .
H89B H 1.1792 1.2983 0.0179 0.066 Uiso 1 1 calc R U . . .
C90 C 1.0537(10) 1.3193(6) -0.0096(6) 0.054(3) Uani 1 1 d . U . . .
H90A H 1.0579 1.3623 -0.0220 0.064 Uiso 1 1 calc R U . . .
H90B H 1.0685 1.2994 -0.0432 0.064 Uiso 1 1 calc R U . . .
C91 C 0.6662(11) 1.5135(6) -0.1052(7) 0.066(4) Uani 1 1 d . U . . .
H91A H 0.6018 1.5185 -0.1105 0.079 Uiso 1 1 calc R U . . .
H91B H 0.6733 1.5503 -0.0929 0.079 Uiso 1 1 calc R U . . .
C92 C 0.7208(10) 1.5081(5) -0.1598(6) 0.060(4) Uani 1 1 d . U . . .
H92A H 0.6903 1.5367 -0.1910 0.072 Uiso 1 1 calc R U . . .
H92B H 0.7808 1.5171 -0.1593 0.072 Uiso 1 1 calc R U . . .
C93 C 0.6156(10) 1.4478(8) -0.0177(7) 0.073(5) Uani 1 1 d . U . . .
H93A H 0.5847 1.4850 -0.0030 0.087 Uiso 1 1 calc R U . . .
H93B H 0.6381 1.4163 0.0144 0.087 Uiso 1 1 calc R U . . .
C94 C 0.7693(8) 1.4631(5) -0.0326(5) 0.043(3) Uani 1 1 d . U . . .
H94A H 0.7638 1.4425 0.0074 0.052 Uiso 1 1 calc R U . . .
H94B H 0.7710 1.5058 -0.0334 0.052 Uiso 1 1 calc R U . . .
C95 C 0.5503(11) 1.4260(9) -0.0466(8) 0.087(6) Uani 1 1 d . U . . .
H95A H 0.5082 1.4068 -0.0177 0.105 Uiso 1 1 calc R U . . .
H95B H 0.5144 1.4609 -0.0706 0.105 Uiso 1 1 calc R U . . .
C96 C 0.8548(8) 1.4325(5) -0.0632(5) 0.039(3) Uani 1 1 d . U . . .
H96E H 0.8693 1.4593 -0.0991 0.047 Uiso 1 1 calc R U . . .
H96F H 0.9054 1.4250 -0.0397 0.047 Uiso 1 1 calc R U . . .
N1 N 0.1155(8) 0.6296(5) 0.2367(4) 0.047(3) Uani 1 1 d . . . . .
N2 N 0.4687(7) 0.7329(4) 0.2303(4) 0.043(3) Uani 1 1 d . . . . .
N3 N 0.8058(7) 0.7185(5) 0.3965(5) 0.047(3) Uani 1 1 d . . . . .
N4 N 0.6594(7) 1.0003(4) 0.2992(4) 0.037(2) Uani 1 1 d . . . . .
N5 N 0.7644(7) 1.2807(4) 0.2884(4) 0.044(3) Uani 1 1 d . . . . .
N6 N 0.8238(10) 1.2125(6) 0.0340(5) 0.070(4) Uani 1 1 d . . . . .
N7 N 0.4993(10) 0.4866(5) 0.3234(6) 0.077(4) Uani 1 1 d . . . . .
N8 N 0.4445(7) 0.7442(4) 0.4646(4) 0.040(2) Uani 1 1 d . . . . .
N9 N 0.6809(9) 0.9480(5) 0.5295(4) 0.058(3) Uani 1 1 d . . . . .
N10 N 1.0025(8) 1.0582(6) 0.3006(6) 0.078(5) Uani 1 1 d . . . . .
N11 N 1.0919(7) 1.3085(4) 0.0883(4) 0.044(3) Uani 1 1 d . . . . .
N12 N 0.6919(7) 1.4603(5) -0.0601(5) 0.049(3) Uani 1 1 d . . . . .
N13 N 0.6465(9) 0.6742(5) 0.2691(6) 0.064(4) Uani 1 1 d . . . . .
N14 N 0.6992(11) 0.6346(8) 0.2592(6) 0.078(4) Uani 1 1 d . . . . .
N15 N 0.7596(12) 0.5926(8) 0.2476(9) 0.121(7) Uani 1 1 d . . . . .
N16 N 0.6244(10) 1.1108(7) 0.3396(8) 0.040(4) Uani 0.525(16) 1 d DG U P C 1
N17 N 0.5662(10) 1.1461(7) 0.3535(5) 0.072(5) Uani 0.525(16) 1 d DG U P C 1
N18 N 0.5033(15) 1.1844(11) 0.3696(9) 0.116(9) Uani 0.525(16) 1 d DG U P C 1
N16' N 0.6289(10) 1.1069(8) 0.3679(6) 0.040(4) Uani 0.475(16) 1 d DG . P C 2
N17' N 0.5723(10) 1.1379(8) 0.3449(6) 0.072(5) Uani 0.475(16) 1 d G . P C 2
N18' N 0.5093(17) 1.1716(14) 0.3207(12) 0.112(9) Uani 0.475(16) 1 d DG U P C 2
N19 N 0.9520(10) 1.2466(5) -0.0685(5) 0.066(4) Uani 1 1 d . . . . .
N20 N 1.0186(15) 1.2146(8) -0.0615(6) 0.088(5) Uani 1 1 d . . . . .
N21 N 1.0914(15) 1.1812(9) -0.0536(8) 0.117(7) Uani 1 1 d . . . . .
O1 O 0.2266(7) 0.5131(4) 0.2829(4) 0.054(2) Uani 1 1 d . . . . .
O2 O 0.2945(7) 0.5092(4) 0.3592(4) 0.064(3) Uani 1 1 d . . . . .
O3 O 0.2824(8) 0.6116(5) 0.4215(4) 0.067(3) Uani 1 1 d . . . . .
O4 O 0.3103(14) 0.5361(8) 0.4965(6) 0.141(7) Uani 1 1 d . . . . .
O5 O 0.7691(6) 0.7584(4) 0.5092(4) 0.050(2) Uani 1 1 d . . . . .
O6 O 0.8301(7) 0.8337(5) 0.5214(4) 0.069(3) Uani 1 1 d . . . . .
O7 O 0.9582(7) 0.8955(5) 0.4317(5) 0.082(4) Uani 1 1 d . . . . .
O8 O 1.0190(12) 0.9105(11) 0.5021(9) 0.176(8) Uani 1 1 d . U . . .
O9 O 0.9466(6) 1.3036(4) 0.2562(4) 0.050(2) Uani 1 1 d . . . . .
O10 O 0.9647(6) 1.3721(4) 0.1778(4) 0.042(2) Uani 1 1 d . . . . .
O11 O 0.8179(5) 1.4414(3) 0.1007(3) 0.0392(19) Uani 1 1 d . . . . .
O12 O 0.8963(7) 1.5148(4) 0.0841(5) 0.062(3) Uani 1 1 d . . . . .
O13 O 0.2483(6) 0.6339(3) 0.2969(3) 0.042(2) Uani 1 1 d . . . . .
O14 O 0.2630(6) 0.6595(3) 0.1697(3) 0.042(2) Uani 1 1 d . . . . .
O15 O -0.0784(8) 0.6017(6) 0.2752(5) 0.097(4) Uani 1 1 d . . . . .
H15 H -0.1328 0.6029 0.2723 0.117 Uiso 1 1 d R U . . .
O16 O 0.3952(5) 0.6855(3) 0.3325(3) 0.0365(19) Uani 1 1 d . . . . .
O17 O 0.5199(6) 0.7710(3) 0.3154(3) 0.041(2) Uani 1 1 d . . . . .
O18 O 0.5050(7) 0.6898(5) 0.0875(4) 0.073(3) Uani 1 1 d . . . . .
H18A H 0.4705 0.6663 0.0878 0.088 Uiso 1 1 d R U . . .
O19 O 0.6570(5) 0.8052(3) 0.3638(3) 0.0343(18) Uani 1 1 d . . . . .
O20 O 0.8234(5) 0.8322(4) 0.4016(4) 0.044(2) Uani 1 1 d . . . . .
O21 O 0.9277(9) 0.5960(6) 0.3919(6) 0.112(5) Uani 1 1 d . . . . .
H21 H 0.9294 0.6122 0.3497 0.135 Uiso 1 1 d R U . . .
O22 O 0.8141(5) 0.9642(3) 0.3506(3) 0.0362(19) Uani 1 1 d . . . . .
O23 O 0.7717(6) 1.0757(3) 0.2646(3) 0.041(2) Uani 1 1 d . . . . .
O24 O 0.4354(6) 0.9556(4) 0.3349(4) 0.047(2) Uani 1 1 d . . . . .
H24 H 0.4470 0.9222 0.3569 0.056 Uiso 1 1 d R U . . .
O25 O 0.8077(5) 1.1914(4) 0.2225(4) 0.042(2) Uani 1 1 d . . . . .
O26 O 0.8096(5) 1.3216(3) 0.1768(3) 0.0361(19) Uani 1 1 d . . . . .
O27 O 0.6669(14) 1.3372(8) 0.3849(10) 0.123(7) Uani 0.629(14) 1 d D U P A 1
H27 H 0.6312 1.3361 0.4115 0.147 Uiso 0.629(14) 1 d R U P A 1
O27' O 0.829(3) 1.2124(18) 0.4482(7) 0.123(7) Uani 0.371(14) 1 d D . P A 2
H27' H 0.8687 1.1811 0.4575 0.184 Uiso 0.371(14) 1 d R U P A 2
O28 O 0.8059(6) 1.3271(4) 0.0523(3) 0.042(2) Uani 1 1 d . . . . .
O29 O 0.7589(7) 1.2979(4) -0.0526(4) 0.054(2) Uani 1 1 d . . . . .
O30 O 0.9283(14) 1.0650(8) 0.1057(8) 0.076(6) Uani 0.561(15) 1 d D U P B 1
H30 H 0.9263 1.0662 0.1393 0.091 Uiso 0.561(15) 1 d R U P B 1
O30' O 0.8550(19) 1.0822(12) 0.1040(10) 0.073(6) Uani 0.439(15) 1 d D U P B 2
H30' H 0.8344 1.1120 0.1188 0.087 Uiso 0.439(15) 1 d R U P B 2
O31 O 0.5249(6) 0.5984(3) 0.3298(4) 0.053(2) Uani 1 1 d . . . . .
O32 O 0.4369(8) 0.5206(4) 0.4248(5) 0.081(4) Uani 1 1 d . . . . .
H32 H 0.3845 0.5191 0.4539 0.097 Uiso 1 1 d R U . . .
O33 O 0.3849(6) 0.5719(4) 0.2513(4) 0.048(2) Uani 1 1 d . . . . .
O34 O 0.6134(5) 0.7605(4) 0.4622(3) 0.0378(19) Uani 1 1 d . . . . .
O35 O 0.4582(5) 0.8479(3) 0.3967(3) 0.0365(19) Uani 1 1 d . . . . .
O36 O 0.5620(6) 0.6857(3) 0.3898(3) 0.041(2) Uani 1 1 d . . . . .
O37 O 0.7222(6) 1.0147(4) 0.4259(3) 0.044(2) Uani 1 1 d . . . . .
O38 O 0.8556(9) 0.9616(6) 0.5117(4) 0.101(5) Uani 1 1 d . . . . .
H38 H 0.9154 0.9361 0.5204 0.121 Uiso 1 1 d R U . . .
O39 O 0.6734(5) 0.8782(3) 0.4495(3) 0.0380(19) Uani 1 1 d . . . . .
O40 O 0.9411(6) 1.1795(4) 0.2707(3) 0.046(2) Uani 1 1 d . . . . .
O41 O 0.8285(6) 1.0949(4) 0.3451(3) 0.049(2) Uani 1 1 d . . . . .
O42 O 0.9412(7) 1.0794(4) 0.2010(4) 0.060(3) Uani 1 1 d . . . . .
O43 O 0.9973(6) 1.4223(4) 0.0557(4) 0.052(2) Uani 1 1 d . . . . .
H43 H 0.9695 1.4584 0.0732 0.062 Uiso 1 1 d R U . . .
O44 O 0.9567(5) 1.2510(3) 0.1520(3) 0.0384(19) Uani 1 1 d . . . . .
O45 O 0.9661(6) 1.3157(4) 0.0141(3) 0.045(2) Uani 1 1 d . . . . .
O46 O 0.7302(6) 1.4470(3) -0.1674(4) 0.049(2) Uani 1 1 d . . . . .
O47 O 0.5991(6) 1.3841(4) -0.0800(4) 0.060(3) Uani 1 1 d . . . . .
O48 O 0.8441(6) 1.3764(3) -0.0746(3) 0.043(2) Uani 1 1 d . . . . .
O49 O 0.2808(8) 0.9873(6) 0.2812(8) 0.138(7) Uani 1 1 d . . . . .
H49K H 0.2496 1.0272 0.2614 0.207 Uiso 1 1 d R U . . .
H49L H 0.3456 0.9873 0.2812 0.207 Uiso 1 1 d R U . . .
O50 O 0.2732(18) 0.0968(13) 0.2143(11) 0.108(9) Uani 0.5 1 d . . P . .
O51 O 0.538(2) 0.7489(16) 0.9782(14) 0.068(8) Uani 0.299(15) 1 d . U P D 1
O51' O 0.617(3) 0.729(2) 0.989(2) 0.068(8) Uani 0.201(15) 1 d . U P D 2
O54 O 0.698(4) 0.917(2) 0.142(2) 0.129(15) Uani 0.315(7) 1 d . U P A 1
O54' O 0.634(7) 0.904(4) 0.158(4) 0.129(15) Uani 0.185(7) 1 d . U P A 2
C97 C 0.775(2) 0.7473(16) 0.1675(16) 0.089(9) Uani 0.5 1 d D U P . .
H97C H 0.7463 0.7212 0.1986 0.107 Uiso 0.5 1 calc R U P . .
H97D H 0.8064 0.7234 0.1389 0.107 Uiso 0.5 1 calc R U P . .
H97G H 0.7280 0.7802 0.1504 0.107 Uiso 0.5 1 calc R U P . .
C98 C 0.841(2) 0.7738(17) 0.1902(16) 0.091(10) Uani 0.5 1 d D U P . .
N22 N 0.888(2) 0.7956(18) 0.2127(15) 0.125(13) Uani 0.5 1 d D U P . .
O55 O 0.248(3) 0.103(2) 0.0965(19) 0.186(16) Uani 0.5 1 d . U P . .
O56 O 0.546(3) 0.153(2) 0.1114(18) 0.179(16) Uani 0.5 1 d . U P . .
O57 O 0.686(3) 0.062(2) 0.084(2) 0.095(15) Uani 0.25 1 d . U P . .
O58 O 0.477(4) 0.312(2) 0.344(2) 0.101(16) Uani 0.25 1 d . U P . .
 
loop_
 _atom_site_aniso_label
 _atom_site_aniso_U_11
 _atom_site_aniso_U_22
 _atom_site_aniso_U_33
 _atom_site_aniso_U_23
 _atom_site_aniso_U_13
 _atom_site_aniso_U_12
Dy1 0.0688(5) 0.0256(3) 0.0487(4) 0.0042(3) -0.0202(3) -0.0203(3)
Dy2 0.0536(4) 0.0458(4) 0.0377(4) 0.0108(3) -0.0240(3) -0.0242(3)
Dy3 0.0466(4) 0.0285(3) 0.0374(3) -0.0107(2) 0.0018(3) -0.0197(3)
Fe1 0.0599(12) 0.0266(9) 0.0407(10) -0.0044(7) -0.0090(9) -0.0162(8)
Fe2 0.0596(12) 0.0215(8) 0.0470(11) -0.0066(7) -0.0130(9) -0.0136(8)
Fe3 0.0433(10) 0.0246(8) 0.0327(9) -0.0018(7) -0.0102(8) -0.0119(7)
Fe4 0.0408(10) 0.0282(9) 0.0352(10) 0.0001(7) -0.0116(8) -0.0076(8)
Fe5 0.0450(10) 0.0274(8) 0.0322(9) -0.0018(7) -0.0121(8) -0.0133(8)
Fe6 0.0424(10) 0.0274(8) 0.0368(10) 0.0037(7) -0.0143(8) -0.0135(8)
Fe7 0.0471(11) 0.0274(9) 0.0413(10) -0.0091(7) -0.0011(8) -0.0159(8)
Fe8 0.0759(14) 0.0283(9) 0.0346(10) -0.0093(7) -0.0056(9) -0.0211(9)
Fe9 0.0601(12) 0.0306(9) 0.0393(10) -0.0147(8) -0.0016(9) -0.0210(9)
C1 0.102(11) 0.056(9) 0.049(9) 0.002(6) -0.015(8) -0.045(8)
C2 0.116(10) 0.051(8) 0.051(9) 0.011(6) -0.024(8) -0.052(8)
C3 0.216(19) 0.109(15) 0.113(16) 0.074(12) -0.096(15) -0.129(14)
C4 0.145(11) 0.068(12) 0.099(14) -0.002(10) 0.047(12) -0.056(10)
C5 0.130(14) 0.096(15) 0.095(13) -0.006(12) -0.002(12) -0.052(13)
C6 0.188(18) 0.087(13) 0.101(12) -0.049(11) 0.007(12) -0.044(14)
C7 0.114(15) 0.19(3) 0.18(2) -0.08(2) 0.000(15) -0.018(17)
C8 0.214(19) 0.173(18) 0.113(11) -0.055(13) 0.001(12) -0.031(15)
C9 0.068(10) 0.051(9) 0.077(9) 0.024(7) -0.041(8) -0.030(8)
C10 0.155(14) 0.078(11) 0.073(10) 0.035(8) -0.066(8) -0.068(11)
C11 0.159(14) 0.16(2) 0.144(19) 0.062(17) -0.124(13) -0.050(17)
C12 0.202(15) 0.179(18) 0.097(11) 0.041(13) -0.028(11) 0.004(15)
C13 0.106(9) 0.138(10) 0.121(10) -0.004(8) -0.027(8) -0.052(7)
C14 0.127(10) 0.149(10) 0.173(11) -0.006(9) -0.029(8) -0.034(8)
C15 0.058(12) 0.131(18) 0.197(14) 0.008(14) 0.003(13) -0.015(13)
C16 0.144(16) 0.141(10) 0.225(18) 0.029(12) -0.037(15) -0.032(12)
C17 0.049(8) 0.028(6) 0.055(8) -0.009(6) -0.013(6) -0.015(6)
C18 0.096(9) 0.031(6) 0.066(9) -0.005(6) -0.036(8) -0.023(6)
C19 0.137(13) 0.083(13) 0.19(2) -0.086(14) -0.087(14) 0.014(10)
C20 0.119(11) 0.099(13) 0.094(13) -0.024(10) -0.041(10) -0.073(11)
C21 0.063(7) 0.041(7) 0.037(7) -0.017(6) 0.002(6) -0.017(6)
C22 0.070(8) 0.043(7) 0.062(9) -0.022(7) 0.005(7) -0.010(7)
C23 0.096(14) 0.050(8) 0.24(3) -0.039(13) 0.058(16) -0.010(9)
C24 0.073(9) 0.086(12) 0.119(15) -0.051(12) -0.028(10) 0.021(9)
C25 0.069(9) 0.065(9) 0.045(8) -0.017(7) -0.006(7) -0.017(7)
C26 0.071(10) 0.054(8) 0.042(8) -0.021(7) -0.007(7) -0.011(7)
C27 0.075(9) 0.042(7) 0.037(7) -0.013(6) -0.014(7) -0.005(6)
C28 0.081(9) 0.024(6) 0.036(7) 0.001(5) -0.022(7) -0.013(6)
C29 0.068(8) 0.046(8) 0.048(8) -0.012(6) -0.003(7) -0.025(7)
C30 0.082(9) 0.073(11) 0.065(10) -0.007(8) -0.022(9) -0.024(9)
C31 0.056(8) 0.026(6) 0.040(6) -0.010(5) -0.014(6) -0.012(6)
C32 0.068(9) 0.023(6) 0.035(6) -0.005(5) -0.015(6) -0.014(6)
C33 0.086(10) 0.032(7) 0.030(6) 0.001(5) -0.014(7) -0.025(7)
C34 0.083(10) 0.024(6) 0.036(7) 0.004(5) -0.020(7) -0.025(6)
C35 0.070(9) 0.053(8) 0.048(7) -0.028(6) -0.006(7) -0.020(7)
C36 0.088(11) 0.066(9) 0.045(7) -0.024(6) 0.003(7) -0.046(8)
C37 0.046(7) 0.034(6) 0.051(8) -0.019(6) -0.005(6) 0.003(6)
C38 0.049(8) 0.034(6) 0.044(7) -0.011(5) -0.003(6) -0.003(6)
C39 0.056(10) 0.076(10) 0.132(15) -0.054(11) -0.008(10) -0.005(9)
C40 0.039(9) 0.049(9) 0.27(2) -0.005(13) 0.018(13) -0.004(8)
C41 0.078(11) 0.040(8) 0.089(12) 0.000(7) -0.011(9) 0.003(8)
C42 0.080(12) 0.051(9) 0.115(15) -0.001(9) 0.027(11) 0.022(9)
C43 0.053(7) 0.029(6) 0.030(6) -0.001(5) -0.006(6) -0.011(6)
C44 0.049(7) 0.042(7) 0.035(7) -0.008(6) 0.005(6) -0.007(6)
C45 0.075(9) 0.037(7) 0.047(8) 0.007(6) -0.035(7) -0.029(7)
C46 0.080(9) 0.039(7) 0.037(7) 0.009(6) -0.026(7) -0.032(7)
C47 0.047(8) 0.029(6) 0.053(8) -0.003(5) -0.026(6) -0.011(6)
C48 0.053(8) 0.043(7) 0.050(8) -0.007(6) -0.018(7) -0.020(6)
C49 0.051(8) 0.044(8) 0.056(8) 0.003(6) 0.006(7) -0.004(7)
C50 0.032(7) 0.041(7) 0.047(7) 0.011(5) -0.005(6) -0.017(6)
C51 0.053(8) 0.031(7) 0.053(7) -0.002(6) 0.010(7) -0.005(6)
C52 0.049(8) 0.033(7) 0.052(7) 0.002(6) -0.002(7) 0.003(6)
C53 0.086(11) 0.043(8) 0.064(9) -0.001(7) -0.011(8) -0.008(8)
C54 0.106(19) 0.083(17) 0.063(15) 0.018(14) 0.000(11) 0.011(16)
C54' 0.10(2) 0.062(19) 0.08(2) 0.014(14) -0.033(19) -0.027(18)
C55 0.130(14) 0.079(8) 0.043(8) -0.003(7) -0.011(9) -0.090(10)
C56 0.086(11) 0.084(9) 0.047(8) -0.031(8) 0.008(8) -0.057(9)
C57 0.158(16) 0.049(8) 0.044(8) 0.001(6) -0.029(9) -0.062(9)
C58 0.111(12) 0.045(7) 0.050(8) -0.003(6) -0.014(8) -0.053(8)
C59 0.195(19) 0.031(7) 0.046(9) 0.010(6) -0.043(11) -0.022(10)
C60 0.15(2) 0.034(9) 0.030(13) -0.006(8) -0.024(12) -0.015(12)
C60' 0.15(2) 0.034(9) 0.031(13) -0.006(8) -0.025(13) -0.015(12)
C61 0.084(12) 0.030(8) 0.121(14) -0.016(8) -0.040(10) 0.013(8)
C62 0.076(11) 0.023(7) 0.140(15) -0.017(8) -0.040(10) 0.002(7)
C63 0.130(16) 0.032(9) 0.155(17) 0.009(10) -0.049(15) -0.016(10)
C64 0.133(16) 0.041(10) 0.132(15) 0.040(9) -0.050(14) -0.021(10)
C65 0.096(12) 0.030(7) 0.147(16) -0.033(8) -0.055(12) 0.006(8)
C66 0.084(11) 0.044(8) 0.112(13) -0.049(8) -0.038(10) 0.018(8)
C67 0.062(7) 0.057(8) 0.047(8) -0.007(7) -0.009(7) -0.026(7)
C68 0.061(7) 0.055(8) 0.038(7) 0.002(6) -0.018(7) -0.028(7)
C69 0.036(7) 0.044(6) 0.036(7) -0.001(5) -0.008(5) -0.012(6)
C70 0.043(8) 0.035(6) 0.055(8) -0.008(6) -0.003(6) -0.009(6)
C71 0.073(9) 0.046(8) 0.046(8) 0.013(6) -0.017(7) -0.031(7)
C72 0.078(9) 0.043(8) 0.062(9) 0.008(7) -0.027(7) -0.022(7)
C73 0.163(17) 0.119(14) 0.032(8) -0.004(8) -0.018(10) -0.099(13)
C74 0.20(2) 0.151(17) 0.054(11) 0.000(11) -0.045(12) -0.125(16)
C75 0.114(12) 0.057(9) 0.036(7) -0.026(6) 0.016(7) -0.051(9)
C76 0.096(11) 0.059(9) 0.040(8) -0.017(6) 0.012(7) -0.044(8)
C77 0.102(12) 0.068(9) 0.024(6) -0.016(6) 0.013(7) -0.048(9)
C78 0.067(9) 0.056(8) 0.041(7) -0.027(7) 0.009(7) -0.018(7)
C79 0.052(9) 0.098(10) 0.080(11) 0.057(9) -0.032(8) -0.035(8)
C80 0.071(10) 0.097(10) 0.054(9) 0.026(8) -0.034(8) -0.056(8)
C81 0.066(11) 0.161(19) 0.110(15) 0.101(13) -0.062(10) -0.061(11)
C82 0.109(12) 0.168(18) 0.044(9) 0.035(10) -0.043(10) -0.112(12)
C83 0.067(12) 0.033(9) 0.200(19) 0.023(12) 0.001(14) 0.011(9)
C84 0.083(13) 0.045(10) 0.174(18) -0.021(11) 0.037(13) -0.007(10)
C85 0.055(9) 0.043(7) 0.095(11) -0.027(7) 0.006(8) -0.028(7)
C86 0.066(10) 0.044(7) 0.091(11) -0.030(7) 0.013(8) -0.028(7)
C87 0.045(8) 0.056(8) 0.055(9) -0.009(7) -0.004(7) -0.012(6)
C88 0.047(8) 0.053(8) 0.050(8) -0.009(7) 0.002(7) -0.012(6)
C89 0.058(9) 0.042(8) 0.057(9) -0.011(6) 0.022(6) -0.012(7)
C90 0.073(10) 0.044(8) 0.046(8) -0.018(6) 0.017(6) -0.019(7)
C91 0.084(11) 0.044(8) 0.082(10) -0.035(8) -0.027(8) -0.005(8)
C92 0.096(11) 0.025(6) 0.069(9) -0.018(6) -0.027(7) -0.013(7)
C93 0.053(9) 0.086(11) 0.103(12) -0.069(10) 0.008(8) -0.026(8)
C94 0.060(8) 0.031(6) 0.048(8) -0.018(5) -0.011(6) -0.016(6)
C95 0.064(10) 0.107(13) 0.121(14) -0.083(12) 0.008(9) -0.034(10)
C96 0.063(8) 0.017(5) 0.041(7) -0.003(5) -0.010(6) -0.016(5)
N1 0.066(7) 0.041(6) 0.036(6) -0.006(5) -0.009(5) -0.015(5)
N2 0.064(7) 0.033(6) 0.040(6) -0.016(5) -0.001(5) -0.021(5)
N3 0.035(6) 0.036(6) 0.064(7) -0.004(5) -0.010(5) 0.001(5)
N4 0.049(6) 0.030(5) 0.039(6) 0.004(4) -0.023(5) -0.019(5)
N5 0.059(7) 0.025(5) 0.041(6) 0.000(4) 0.001(5) -0.005(5)
N6 0.132(12) 0.058(8) 0.043(7) -0.008(6) -0.019(8) -0.060(8)
N7 0.114(12) 0.015(5) 0.106(11) 0.007(6) -0.055(9) -0.013(6)
N8 0.055(7) 0.043(6) 0.027(5) 0.002(4) -0.008(5) -0.025(5)
N9 0.109(10) 0.051(7) 0.029(6) -0.007(5) -0.010(6) -0.046(7)
N10 0.040(7) 0.071(9) 0.111(12) 0.054(8) -0.039(7) -0.031(7)
N11 0.050(7) 0.034(6) 0.051(7) -0.006(5) 0.005(5) -0.020(5)
N12 0.043(6) 0.051(7) 0.060(7) -0.033(6) 0.004(6) -0.012(5)
N13 0.081(9) 0.027(6) 0.088(10) -0.035(6) -0.011(7) 0.001(6)
N14 0.090(11) 0.098(12) 0.068(9) -0.035(9) -0.003(8) -0.051(10)
N15 0.100(13) 0.105(14) 0.152(17) -0.070(13) 0.003(12) 0.024(11)
N16 0.043(5) 0.040(5) 0.038(6) -0.011(5) -0.007(5) -0.002(4)
N17 0.050(8) 0.040(8) 0.107(12) 0.022(8) 0.009(8) -0.014(7)
N18 0.121(19) 0.087(17) 0.12(2) -0.009(17) 0.03(2) -0.005(15)
N16' 0.043(5) 0.040(5) 0.038(6) -0.011(5) -0.007(5) -0.002(4)
N17' 0.050(8) 0.040(8) 0.107(12) 0.022(8) 0.009(8) -0.014(7)
N18' 0.118(19) 0.085(17) 0.11(2) -0.011(17) 0.02(2) -0.006(15)
N19 0.105(11) 0.037(7) 0.051(8) -0.009(6) -0.043(8) 0.015(7)
N20 0.152(18) 0.065(11) 0.047(9) -0.012(8) -0.004(10) -0.022(11)
N21 0.149(18) 0.087(13) 0.103(14) -0.005(11) -0.038(13) 0.006(12)
O1 0.086(7) 0.036(5) 0.046(6) 0.000(4) -0.016(5) -0.026(5)
O2 0.104(8) 0.042(5) 0.056(6) 0.017(4) -0.029(6) -0.045(6)
O3 0.106(9) 0.068(7) 0.043(6) 0.001(5) -0.012(6) -0.056(6)
O4 0.25(2) 0.113(13) 0.050(8) -0.001(8) 0.014(10) -0.041(13)
O5 0.050(5) 0.049(5) 0.052(6) 0.006(4) -0.025(5) -0.016(4)
O6 0.084(7) 0.065(7) 0.064(7) 0.029(5) -0.050(6) -0.036(6)
O7 0.050(6) 0.089(8) 0.100(9) 0.051(7) -0.049(6) -0.033(6)
O8 0.136(12) 0.257(17) 0.165(14) -0.016(13) -0.088(11) -0.076(12)
O9 0.063(6) 0.035(5) 0.062(6) -0.012(4) -0.002(5) -0.029(4)
O10 0.057(6) 0.037(5) 0.041(5) -0.012(4) -0.005(4) -0.022(4)
O11 0.050(5) 0.032(4) 0.037(5) -0.008(4) -0.001(4) -0.013(4)
O12 0.060(6) 0.032(5) 0.096(8) -0.015(5) 0.019(6) -0.025(5)
O13 0.061(6) 0.029(4) 0.039(5) -0.005(4) -0.012(4) -0.015(4)
O14 0.068(6) 0.027(4) 0.036(5) -0.010(3) -0.001(4) -0.022(4)
O15 0.082(8) 0.132(11) 0.095(10) -0.068(9) 0.010(7) -0.026(8)
O16 0.056(5) 0.015(4) 0.041(5) 0.000(3) -0.013(4) -0.011(4)
O17 0.072(6) 0.024(4) 0.032(4) -0.003(3) -0.020(4) -0.013(4)
O18 0.082(7) 0.098(8) 0.066(7) -0.052(6) 0.024(6) -0.059(7)
O19 0.041(5) 0.029(4) 0.035(4) -0.008(3) 0.000(4) -0.012(4)
O20 0.036(5) 0.033(5) 0.055(6) 0.003(4) -0.003(4) -0.003(4)
O21 0.113(11) 0.078(9) 0.133(12) -0.025(8) -0.035(10) 0.025(8)
O22 0.036(5) 0.039(5) 0.035(5) -0.002(4) -0.008(4) -0.012(4)
O23 0.054(5) 0.039(5) 0.033(5) 0.009(4) -0.018(4) -0.024(4)
O24 0.051(6) 0.028(4) 0.061(6) 0.003(4) -0.015(5) -0.013(4)
O25 0.041(5) 0.037(5) 0.052(5) 0.001(4) -0.016(4) -0.015(4)
O26 0.044(5) 0.028(4) 0.039(5) -0.012(3) 0.002(4) -0.010(4)
O27 0.123(7) 0.122(7) 0.121(7) -0.022(2) -0.010(2) -0.024(2)
O27' 0.123(7) 0.122(7) 0.121(7) -0.022(2) -0.010(2) -0.024(2)
O28 0.054(5) 0.044(5) 0.039(5) -0.013(4) 0.001(4) -0.027(4)
O29 0.092(7) 0.040(5) 0.040(5) -0.006(4) -0.006(5) -0.040(5)
O30 0.135(18) 0.046(10) 0.041(8) -0.009(7) -0.017(12) 0.000(12)
O30' 0.129(19) 0.047(11) 0.039(9) -0.014(8) -0.018(13) -0.002(12)
O31 0.067(6) 0.022(4) 0.071(6) 0.000(4) -0.022(5) -0.011(4)
O32 0.104(9) 0.065(7) 0.079(8) 0.031(6) -0.048(7) -0.044(7)
O33 0.061(6) 0.032(5) 0.057(6) -0.013(4) -0.009(5) -0.016(4)
O34 0.043(5) 0.043(5) 0.031(5) 0.002(4) -0.012(4) -0.019(4)
O35 0.047(5) 0.031(4) 0.034(4) -0.003(3) -0.005(4) -0.016(4)
O36 0.064(6) 0.019(4) 0.040(5) 0.006(3) -0.011(4) -0.012(4)
O37 0.068(6) 0.045(5) 0.030(5) -0.014(4) -0.002(4) -0.026(4)
O38 0.150(12) 0.125(10) 0.059(7) 0.026(7) -0.055(8) -0.102(10)
O39 0.054(5) 0.038(5) 0.026(4) -0.004(3) -0.006(4) -0.019(4)
O40 0.059(6) 0.043(5) 0.041(5) -0.003(4) -0.017(4) -0.021(4)
O41 0.063(6) 0.062(6) 0.037(5) 0.001(4) -0.020(4) -0.040(5)
O42 0.073(7) 0.037(5) 0.066(6) -0.014(5) 0.007(5) -0.009(5)
O43 0.056(6) 0.045(5) 0.066(6) -0.031(5) 0.021(5) -0.030(5)
O44 0.042(5) 0.033(4) 0.044(5) -0.008(4) -0.001(4) -0.017(4)
O45 0.061(6) 0.038(5) 0.040(5) -0.014(4) 0.006(4) -0.020(4)
O46 0.079(7) 0.022(4) 0.052(5) -0.012(4) -0.010(5) -0.016(4)
O47 0.064(6) 0.064(6) 0.071(7) -0.047(5) 0.004(5) -0.025(5)
O48 0.068(6) 0.030(4) 0.041(5) -0.012(4) -0.002(4) -0.025(4)
O49 0.050(7) 0.107(11) 0.238(19) 0.024(11) -0.062(10) -0.001(7)
O50 0.095(19) 0.11(2) 0.10(2) 0.013(16) 0.025(16) -0.037(17)
O51 0.061(10) 0.074(10) 0.064(10) -0.005(7) -0.004(7) -0.015(7)
O51' 0.061(10) 0.074(10) 0.065(10) -0.005(7) -0.004(7) -0.015(7)
O54 0.134(16) 0.132(16) 0.125(16) -0.030(8) -0.017(7) -0.027(8)
O54' 0.134(16) 0.132(16) 0.125(16) -0.030(8) -0.017(7) -0.028(8)
C97 0.066(15) 0.085(17) 0.103(18) -0.035(14) -0.007(13) 0.030(12)
C98 0.088(13) 0.086(13) 0.084(13) -0.009(9) 0.006(9) -0.006(9)
N22 0.106(19) 0.14(2) 0.108(19) -0.027(16) 0.015(15) -0.004(16)
O55 0.182(18) 0.183(18) 0.181(18) -0.023(10) -0.007(10) -0.029(10)
O56 0.170(18) 0.182(18) 0.185(18) -0.025(10) -0.027(10) -0.041(10)
O57 0.097(17) 0.098(17) 0.090(17) -0.015(10) -0.013(10) -0.022(10)
O58 0.105(18) 0.093(18) 0.102(18) -0.017(10) -0.010(10) -0.018(10)
 
_geom_special_details
;
 All esds (except the esd in the dihedral angle between two l.s. planes)
 are estimated using the full covariance matrix.  The cell esds are taken
 into account individually in the estimation of esds in distances, angles
 and torsion angles; correlations between esds in cell parameters are only
 used when they are defined by crystal symmetry.  An approximate (isotropic)
 treatment of cell esds is used for estimating esds involving l.s. planes.
;
 
loop_
 _geom_bond_atom_site_label_1
 _geom_bond_atom_site_label_2
 _geom_bond_distance
 _geom_bond_site_symmetry_2
 _geom_bond_publ_flag
Dy1 O31 2.308(9) . ?
Dy1 O3 2.312(11) . ?
Dy1 O33 2.313(9) . ?
Dy1 O16 2.339(7) . ?
Dy1 O2 2.349(9) . ?
Dy1 O13 2.355(8) . ?
Dy1 O32 2.369(9) . ?
Dy1 N7 2.675(13) . ?
Dy1 Fe1 3.3601(18) . ?
Dy1 Fe2 3.4632(18) . ?
Dy2 O37 2.306(9) . ?
Dy2 O7 2.310(10) . ?
Dy2 O39 2.325(8) . ?
Dy2 O20 2.342(8) . ?
Dy2 O22 2.345(8) . ?
Dy2 O6 2.366(9) . ?
Dy2 O38 2.407(10) . ?
Dy2 N9 2.657(12) . ?
Dy2 Fe4 3.3694(17) . ?
Dy3 O44 2.320(8) . ?
Dy3 O11 2.322(8) . ?
Dy3 O45 2.329(8) . ?
Dy3 O28 2.331(8) . ?
Dy3 O26 2.348(8) . ?
Dy3 O10 2.358(8) . ?
Dy3 O43 2.375(8) . ?
Dy3 N11 2.658(11) . ?
Dy3 Fe7 3.3657(18) . ?
Dy3 Fe8 3.4880(17) . ?
Fe1 O33 1.918(9) . ?
Fe1 O13 1.947(8) . ?
Fe1 O46 1.976(8) 2_675 ?
Fe1 O14 2.016(8) . ?
Fe1 O1 2.045(9) . ?
Fe1 N1 2.209(11) . ?
Fe2 O31 1.936(8) . ?
Fe2 O16 1.965(8) . ?
Fe2 O17 1.997(7) . ?
Fe2 N13 2.011(14) . ?
Fe2 O36 2.015(8) . ?
Fe2 N2 2.287(10) . ?
Fe3 O35 1.896(8) . ?
Fe3 O19 1.998(8) . ?
Fe3 O17 1.999(7) . ?
Fe3 O36 2.025(7) . ?
Fe3 O34 2.040(7) . ?
Fe3 N8 2.255(10) . ?
Fe4 O39 1.936(8) . ?
Fe4 O20 1.955(8) . ?
Fe4 O34 1.967(8) . ?
Fe4 O19 2.023(8) . ?
Fe4 O5 2.030(8) . ?
Fe4 N3 2.261(10) . ?
Fe5 O37 1.938(8) . ?
Fe5 O22 1.974(8) . ?
Fe5 O23 1.986(8) . ?
Fe5 N16' 1.991(12) . ?
Fe5 N16 1.994(12) . ?
Fe5 O41 2.010(8) . ?
Fe5 N4 2.273(9) . ?
Fe6 O42 1.888(9) . ?
Fe6 O25 1.983(8) . ?
Fe6 O23 1.994(8) . ?
Fe6 O41 2.033(9) . ?
Fe6 O40 2.043(8) . ?
Fe6 N10 2.260(11) . ?
Fe7 O44 1.940(8) . ?
Fe7 O26 1.949(8) . ?
Fe7 O40 1.953(8) . ?
Fe7 O25 2.020(8) . ?
Fe7 O9 2.036(8) . ?
Fe7 N5 2.283(10) . ?
Fe8 O45 1.921(9) . ?
Fe8 O28 1.985(8) . ?
Fe8 O29 1.996(9) . ?
Fe8 N19 2.012(14) . ?
Fe8 O48 2.029(8) . ?
Fe8 N6 2.308(11) . ?
Fe9 O47 1.889(9) . ?
Fe9 O29 1.982(9) . ?
Fe9 O14 1.990(7) 2_675 ?
Fe9 O46 2.021(9) . ?
Fe9 O48 2.027(9) . ?
Fe9 N12 2.253(10) . ?
C1 O2 1.248(16) . ?
C1 O1 1.278(16) . ?
C1 C2 1.473(19) . ?
C2 C3 1.51(2) . ?
C2 C4 1.55(2) . ?
C5 O4 1.23(2) . ?
C5 O3 1.29(2) . ?
C5 C6 1.495(17) . ?
C6 C7 1.546(17) . ?
C6 C8 1.584(17) . ?
C9 O5 1.252(16) . ?
C9 O6 1.273(16) . ?
C9 C10 1.54(2) . ?
C10 C11 1.501(16) . ?
C10 C12 1.511(17) . ?
C13 O8 1.16(3) . ?
C13 O7 1.26(3) . ?
C13 C14 1.530(10) . ?
C14 C15 1.60(3) . ?
C14 C16 1.70(3) . ?
C17 O10 1.259(14) . ?
C17 O9 1.270(14) . ?
C17 C18 1.505(16) . ?
C18 C20 1.48(2) . ?
C18 C19 1.49(2) . ?
C21 O12 1.218(15) . ?
C21 O11 1.296(14) . ?
C21 C22 1.507(18) . ?
C22 C24 1.467(15) . ?
C22 C23 1.53(2) . ?
C25 N1 1.488(16) . ?
C25 C26 1.512(18) . ?
C26 O13 1.405(15) . ?
C27 C28 1.495(18) . ?
C27 N1 1.511(16) . ?
C28 O14 1.437(15) . ?
C29 C30 1.46(2) . ?
C29 N1 1.487(15) . ?
C30 O15 1.455(19) . ?
C31 N2 1.465(16) . ?
C31 C32 1.516(16) . ?
C32 O16 1.404(13) . ?
C33 C34 1.510(16) . ?
C33 N2 1.510(15) . ?
C34 O17 1.425(13) . ?
C35 N2 1.497(15) . ?
C35 C36 1.511(19) . ?
C36 O18 1.411(12) . ?
C37 N3 1.466(15) . ?
C37 C38 1.519(16) . ?
C38 O19 1.406(14) . ?
C39 N3 1.466(16) . ?
C39 C40 1.469(11) . ?
C40 O20 1.370(17) . ?
C41 N3 1.483(17) . ?
C41 C42 1.48(2) . ?
C42 O21 1.394(15) . ?
C43 N4 1.487(14) . ?
C43 C44 1.536(17) . ?
C44 O22 1.383(14) . ?
C45 C46 1.474(18) . ?
C45 N4 1.507(14) . ?
C46 O23 1.393(13) . ?
C47 N4 1.464(16) . ?
C47 C48 1.506(15) . ?
C48 O24 1.410(15) . ?
C49 N5 1.486(16) . ?
C49 C50 1.526(18) . ?
C50 O25 1.407(14) . ?
C51 N5 1.466(14) . ?
C51 C52 1.487(17) . ?
C52 O26 1.393(14) . ?
C53 N5 1.430(16) . ?
C53 C54' 1.5397(10) . ?
C53 C54 1.5399(10) . ?
C54 O27 1.375(10) . ?
C54' O27' 1.375(10) . ?
C55 C56 1.47(2) . ?
C55 N6 1.527(19) . ?
C56 O28 1.389(15) . ?
C57 N6 1.479(16) . ?
C57 C58 1.48(2) . ?
C58 O29 1.420(14) . ?
C59 N6 1.51(2) . ?
C59 C60' 1.52(2) . ?
C59 C60 1.53(2) . ?
C60 O30 1.405(12) . ?
C60' O30' 1.39(2) . ?
C61 N7 1.50(2) . ?
C61 C62 1.50(2) . ?
C62 O31 1.413(16) . ?
C63 N7 1.43(2) . ?
C63 C64 1.52(3) . ?
C64 O32 1.473(14) . ?
C65 C66 1.49(2) . ?
C65 N7 1.501(19) . ?
C66 O33 1.431(16) . ?
C67 N8 1.476(15) . ?
C67 C68 1.512(18) . ?
C68 O34 1.394(14) . ?
C69 N8 1.441(15) . ?
C69 C70 1.501(16) . ?
C70 O35 1.390(14) . ?
C71 N8 1.480(16) . ?
C71 C72 1.52(2) . ?
C72 O36 1.431(15) . ?
C73 N9 1.496(18) . ?
C73 C74 1.52(2) . ?
C74 O38 1.480(15) . ?
C75 N9 1.445(19) . ?
C75 C76 1.535(18) . ?
C76 O37 1.408(15) . ?
C77 N9 1.492(16) . ?
C77 C78 1.504(17) . ?
C78 O39 1.414(15) . ?
C79 C80 1.48(2) . ?
C79 N10 1.489(18) . ?
C80 O40 1.416(15) . ?
C81 C82 1.46(3) . ?
C81 N10 1.48(2) . ?
C82 O41 1.419(16) . ?
C83 N10 1.42(3) . ?
C83 C84 1.52(3) . ?
C84 O42 1.41(2) . ?
C85 N11 1.431(15) . ?
C85 C86 1.46(2) . ?
C86 O43 1.480(13) . ?
C87 N11 1.487(16) . ?
C87 C88 1.507(18) . ?
C88 O44 1.431(15) . ?
C89 N11 1.484(16) . ?
C89 C90 1.492(19) . ?
C90 O45 1.397(15) . ?
C91 C92 1.48(2) . ?
C91 N12 1.486(18) . ?
C92 O46 1.432(13) . ?
C93 N12 1.483(18) . ?
C93 C95 1.525(19) . ?
C94 N12 1.461(15) . ?
C94 C96 1.508(17) . ?
C95 O47 1.404(16) . ?
C96 O48 1.430(12) . ?
N13 N14 1.112(18) . ?
N14 N15 1.22(2) . ?
N16 N17 1.1232 . ?
N17 N18 1.2265 . ?
N16' N17' 1.1232 . ?
N17' N18' 1.2265 . ?
N19 N20 1.12(2) . ?
N20 N21 1.21(2) . ?
O14 Fe9 1.990(7) 2_675 ?
O46 Fe1 1.976(8) 2_675 ?
C97 C98 1.521(16) . ?
C98 N22 1.205(16) . ?
 
loop_
 _geom_angle_atom_site_label_1
 _geom_angle_atom_site_label_2
 _geom_angle_atom_site_label_3
 _geom_angle
 _geom_angle_site_symmetry_1
 _geom_angle_site_symmetry_3
 _geom_angle_publ_flag
O31 Dy1 O3 121.5(3) . . ?
O31 Dy1 O33 91.0(3) . . ?
O3 Dy1 O33 144.9(3) . . ?
O31 Dy1 O16 64.5(3) . . ?
O3 Dy1 O16 82.2(3) . . ?
O33 Dy1 O16 102.8(3) . . ?
O31 Dy1 O2 140.8(3) . . ?
O3 Dy1 O2 80.7(3) . . ?
O33 Dy1 O2 81.3(3) . . ?
O16 Dy1 O2 154.6(3) . . ?
O31 Dy1 O13 133.2(3) . . ?
O3 Dy1 O13 81.9(3) . . ?
O33 Dy1 O13 64.8(3) . . ?
O16 Dy1 O13 81.8(3) . . ?
O2 Dy1 O13 77.3(3) . . ?
O31 Dy1 O32 79.2(3) . . ?
O3 Dy1 O32 72.7(4) . . ?
O33 Dy1 O32 131.7(4) . . ?
O16 Dy1 O32 114.5(3) . . ?
O2 Dy1 O32 77.9(3) . . ?
O13 Dy1 O32 146.9(4) . . ?
O31 Dy1 N7 66.2(4) . . ?
O3 Dy1 N7 134.5(4) . . ?
O33 Dy1 N7 67.9(4) . . ?
O16 Dy1 N7 129.6(4) . . ?
O2 Dy1 N7 75.4(4) . . ?
O13 Dy1 N7 128.0(3) . . ?
O32 Dy1 N7 64.8(4) . . ?
O31 Dy1 Fe1 121.9(2) . . ?
O3 Dy1 Fe1 111.4(3) . . ?
O33 Dy1 Fe1 33.5(2) . . ?
O16 Dy1 Fe1 103.10(18) . . ?
O2 Dy1 Fe1 66.4(2) . . ?
O13 Dy1 Fe1 34.48(19) . . ?
O32 Dy1 Fe1 142.3(2) . . ?
N7 Dy1 Fe1 93.7(3) . . ?
O31 Dy1 Fe2 31.9(2) . . ?
O3 Dy1 Fe2 105.9(2) . . ?
O33 Dy1 Fe2 95.0(2) . . ?
O16 Dy1 Fe2 32.9(2) . . ?
O2 Dy1 Fe2 172.2(3) . . ?
O13 Dy1 Fe2 107.35(19) . . ?
O32 Dy1 Fe2 100.0(2) . . ?
N7 Dy1 Fe2 96.9(3) . . ?
Fe1 Dy1 Fe2 113.78(4) . . ?
O37 Dy2 O7 120.2(3) . . ?
O37 Dy2 O39 91.7(3) . . ?
O7 Dy2 O39 145.1(4) . . ?
O37 Dy2 O20 133.4(3) . . ?
O7 Dy2 O20 81.3(4) . . ?
O39 Dy2 O20 65.5(3) . . ?
O37 Dy2 O22 64.0(3) . . ?
O7 Dy2 O22 83.3(3) . . ?
O39 Dy2 O22 100.5(3) . . ?
O20 Dy2 O22 80.3(3) . . ?
O37 Dy2 O6 141.4(4) . . ?
O7 Dy2 O6 82.1(4) . . ?
O39 Dy2 O6 80.4(3) . . ?
O20 Dy2 O6 77.1(3) . . ?
O22 Dy2 O6 154.6(4) . . ?
O37 Dy2 O38 79.1(4) . . ?
O7 Dy2 O38 72.7(5) . . ?
O39 Dy2 O38 131.8(4) . . ?
O20 Dy2 O38 146.5(4) . . ?
O22 Dy2 O38 116.4(3) . . ?
O6 Dy2 O38 78.6(4) . . ?
O37 Dy2 N9 66.6(3) . . ?
O7 Dy2 N9 135.0(4) . . ?
O39 Dy2 N9 68.0(3) . . ?
O20 Dy2 N9 128.9(3) . . ?
O22 Dy2 N9 128.7(3) . . ?
O6 Dy2 N9 75.5(4) . . ?
O38 Dy2 N9 65.0(4) . . ?
O37 Dy2 Fe4 122.4(2) . . ?
O7 Dy2 Fe4 111.3(3) . . ?
O39 Dy2 Fe4 33.9(2) . . ?
O20 Dy2 Fe4 34.4(2) . . ?
O22 Dy2 Fe4 100.27(18) . . ?
O6 Dy2 Fe4 66.3(2) . . ?
O38 Dy2 Fe4 143.3(3) . . ?
N9 Dy2 Fe4 94.7(2) . . ?
O44 Dy3 O11 144.6(3) . . ?
O44 Dy3 O45 92.9(3) . . ?
O11 Dy3 O45 119.3(3) . . ?
O44 Dy3 O28 97.5(3) . . ?
O11 Dy3 O28 85.4(3) . . ?
O45 Dy3 O28 64.0(3) . . ?
O44 Dy3 O26 65.7(3) . . ?
O11 Dy3 O26 80.3(3) . . ?
O45 Dy3 O26 135.6(3) . . ?
O28 Dy3 O26 80.0(3) . . ?
O44 Dy3 O10 80.6(3) . . ?
O11 Dy3 O10 81.9(3) . . ?
O45 Dy3 O10 141.7(3) . . ?
O28 Dy3 O10 154.0(3) . . ?
O26 Dy3 O10 75.6(3) . . ?
O44 Dy3 O43 132.1(3) . . ?
O11 Dy3 O43 72.5(3) . . ?
O45 Dy3 O43 79.3(3) . . ?
O28 Dy3 O43 119.7(3) . . ?
O26 Dy3 O43 144.0(3) . . ?
O10 Dy3 O43 77.7(3) . . ?
O44 Dy3 N11 68.7(3) . . ?
O11 Dy3 N11 134.8(3) . . ?
O45 Dy3 N11 67.2(3) . . ?
O28 Dy3 N11 128.3(3) . . ?
O26 Dy3 N11 128.9(3) . . ?
O10 Dy3 N11 75.4(3) . . ?
O43 Dy3 N11 64.8(3) . . ?
O44 Dy3 Fe7 34.0(2) . . ?
O11 Dy3 Fe7 110.64(19) . . ?
O45 Dy3 Fe7 124.1(2) . . ?
O28 Dy3 Fe7 98.3(2) . . ?
O26 Dy3 Fe7 34.40(19) . . ?
O10 Dy3 Fe7 65.7(2) . . ?
O43 Dy3 Fe7 141.9(2) . . ?
N11 Dy3 Fe7 94.9(2) . . ?
O44 Dy3 Fe8 95.00(19) . . ?
O11 Dy3 Fe8 105.33(19) . . ?
O45 Dy3 Fe8 31.2(2) . . ?
O28 Dy3 Fe8 32.9(2) . . ?
O26 Dy3 Fe8 108.82(18) . . ?
O10 Dy3 Fe8 171.9(2) . . ?
O43 Dy3 Fe8 100.8(2) . . ?
N11 Dy3 Fe8 96.8(2) . . ?
Fe7 Dy3 Fe8 113.89(4) . . ?
O33 Fe1 O13 80.6(4) . . ?
O33 Fe1 O46 102.3(4) . 2_675 ?
O13 Fe1 O46 174.1(3) . 2_675 ?
O33 Fe1 O14 100.5(4) . . ?
O13 Fe1 O14 98.8(3) . . ?
O46 Fe1 O14 75.7(3) 2_675 . ?
O33 Fe1 O1 97.4(4) . . ?
O13 Fe1 O1 96.4(3) . . ?
O46 Fe1 O1 88.4(3) 2_675 . ?
O14 Fe1 O1 158.1(3) . . ?
O33 Fe1 N1 161.2(4) . . ?
O13 Fe1 N1 80.8(4) . . ?
O46 Fe1 N1 96.1(4) 2_675 . ?
O14 Fe1 N1 80.3(4) . . ?
O1 Fe1 N1 86.8(4) . . ?
O33 Fe1 Dy1 41.7(3) . . ?
O13 Fe1 Dy1 43.2(2) . . ?
O46 Fe1 Dy1 141.3(3) 2_675 . ?
O14 Fe1 Dy1 117.4(2) . . ?
O1 Fe1 Dy1 84.4(3) . . ?
N1 Fe1 Dy1 121.3(3) . . ?
O31 Fe2 O16 79.0(3) . . ?
O31 Fe2 O17 167.8(4) . . ?
O16 Fe2 O17 97.7(3) . . ?
O31 Fe2 N13 94.2(4) . . ?
O16 Fe2 N13 158.6(4) . . ?
O17 Fe2 N13 92.8(4) . . ?
O31 Fe2 O36 95.0(3) . . ?
O16 Fe2 O36 101.4(3) . . ?
O17 Fe2 O36 74.0(3) . . ?
N13 Fe2 O36 99.4(4) . . ?
O31 Fe2 N2 113.2(4) . . ?
O16 Fe2 N2 78.4(3) . . ?
O17 Fe2 N2 77.2(3) . . ?
N13 Fe2 N2 85.9(5) . . ?
O36 Fe2 N2 150.9(3) . . ?
O31 Fe2 Dy1 39.0(3) . . ?
O16 Fe2 Dy1 40.3(2) . . ?
O17 Fe2 Dy1 137.7(3) . . ?
N13 Fe2 Dy1 128.2(3) . . ?
O36 Fe2 Dy1 104.5(2) . . ?
N2 Fe2 Dy1 94.0(2) . . ?
O35 Fe3 O19 101.6(3) . . ?
O35 Fe3 O17 93.8(3) . . ?
O19 Fe3 O17 92.0(3) . . ?
O35 Fe3 O36 145.1(3) . . ?
O19 Fe3 O36 111.1(3) . . ?
O17 Fe3 O36 73.8(3) . . ?
O35 Fe3 O34 105.0(3) . . ?
O19 Fe3 O34 75.2(3) . . ?
O17 Fe3 O34 158.9(4) . . ?
O36 Fe3 O34 95.0(3) . . ?
O35 Fe3 N8 78.6(4) . . ?
O19 Fe3 N8 151.6(3) . . ?
O17 Fe3 N8 116.3(3) . . ?
O36 Fe3 N8 78.2(4) . . ?
O34 Fe3 N8 77.4(3) . . ?
O39 Fe4 O20 80.9(3) . . ?
O39 Fe4 O34 100.9(3) . . ?
O20 Fe4 O34 176.5(3) . . ?
O39 Fe4 O19 98.8(3) . . ?
O20 Fe4 O19 100.5(3) . . ?
O34 Fe4 O19 76.3(3) . . ?
O39 Fe4 O5 98.0(3) . . ?
O20 Fe4 O5 94.9(4) . . ?
O34 Fe4 O5 87.8(3) . . ?
O19 Fe4 O5 158.7(3) . . ?
O39 Fe4 N3 160.6(4) . . ?
O20 Fe4 N3 80.3(4) . . ?
O34 Fe4 N3 97.5(4) . . ?
O19 Fe4 N3 79.6(3) . . ?
O5 Fe4 N3 88.7(4) . . ?
O39 Fe4 Dy2 42.0(2) . . ?
O20 Fe4 Dy2 42.7(2) . . ?
O34 Fe4 Dy2 140.1(2) . . ?
O19 Fe4 Dy2 116.4(2) . . ?
O5 Fe4 Dy2 84.9(2) . . ?
N3 Fe4 Dy2 121.4(3) . . ?
O37 Fe5 O22 78.1(3) . . ?
O37 Fe5 O23 170.3(4) . . ?
O22 Fe5 O23 97.1(3) . . ?
O37 Fe5 N16' 80.7(5) . . ?
O22 Fe5 N16' 154.8(7) . . ?
O23 Fe5 N16' 105.8(6) . . ?
O37 Fe5 N16 99.3(6) . . ?
O22 Fe5 N16 159.5(6) . . ?
O23 Fe5 N16 88.1(6) . . ?
O37 Fe5 O41 98.3(3) . . ?
O22 Fe5 O41 100.0(4) . . ?
O23 Fe5 O41 74.1(3) . . ?
N16' Fe5 O41 96.5(7) . . ?
N16 Fe5 O41 100.6(7) . . ?
O37 Fe5 N4 109.9(3) . . ?
O22 Fe5 N4 79.0(3) . . ?
O23 Fe5 N4 77.0(3) . . ?
N16' Fe5 N4 95.6(6) . . ?
N16 Fe5 N4 82.8(6) . . ?
O41 Fe5 N4 150.7(4) . . ?
O42 Fe6 O25 101.1(4) . . ?
O42 Fe6 O23 93.7(4) . . ?
O25 Fe6 O23 89.7(3) . . ?
O42 Fe6 O41 143.7(4) . . ?
O25 Fe6 O41 112.4(4) . . ?
O23 Fe6 O41 73.4(3) . . ?
O42 Fe6 O40 105.8(4) . . ?
O25 Fe6 O40 74.2(3) . . ?
O23 Fe6 O40 156.6(4) . . ?
O41 Fe6 O40 96.7(3) . . ?
O42 Fe6 N10 78.2(6) . . ?
O25 Fe6 N10 151.1(4) . . ?
O23 Fe6 N10 119.2(4) . . ?
O41 Fe6 N10 79.0(5) . . ?
O40 Fe6 N10 78.2(4) . . ?
O44 Fe7 O26 81.2(3) . . ?
O44 Fe7 O40 101.8(4) . . ?
O26 Fe7 O40 172.8(3) . . ?
O44 Fe7 O25 101.5(3) . . ?
O26 Fe7 O25 97.7(3) . . ?
O40 Fe7 O25 75.4(3) . . ?
O44 Fe7 O9 97.9(3) . . ?
O26 Fe7 O9 95.5(3) . . ?
O40 Fe7 O9 90.5(3) . . ?
O25 Fe7 O9 157.9(4) . . ?
O44 Fe7 N5 161.0(4) . . ?
O26 Fe7 N5 79.8(3) . . ?
O40 Fe7 N5 97.0(4) . . ?
O25 Fe7 N5 80.0(4) . . ?
O9 Fe7 N5 85.1(4) . . ?
O44 Fe7 Dy3 42.0(2) . . ?
O26 Fe7 Dy3 42.9(2) . . ?
O40 Fe7 Dy3 141.9(3) . . ?
O25 Fe7 Dy3 116.1(2) . . ?
O9 Fe7 Dy3 85.4(3) . . ?
N5 Fe7 Dy3 120.3(2) . . ?
O45 Fe8 O28 78.4(3) . . ?
O45 Fe8 O29 168.7(4) . . ?
O28 Fe8 O29 97.2(4) . . ?
O45 Fe8 N19 93.6(5) . . ?
O28 Fe8 N19 160.8(4) . . ?
O29 Fe8 N19 93.5(5) . . ?
O45 Fe8 O48 97.1(3) . . ?
O28 Fe8 O48 100.2(3) . . ?
O29 Fe8 O48 73.2(3) . . ?
N19 Fe8 O48 98.1(4) . . ?
O45 Fe8 N6 111.7(4) . . ?
O28 Fe8 N6 78.2(4) . . ?
O29 Fe8 N6 77.2(4) . . ?
N19 Fe8 N6 88.9(5) . . ?
O48 Fe8 N6 150.0(4) . . ?
O45 Fe8 Dy3 38.9(2) . . ?
O28 Fe8 Dy3 39.6(2) . . ?
O29 Fe8 Dy3 136.3(3) . . ?
N19 Fe8 Dy3 129.7(4) . . ?
O48 Fe8 Dy3 102.6(2) . . ?
N6 Fe8 Dy3 94.9(3) . . ?
O47 Fe9 O29 94.2(4) . . ?
O47 Fe9 O14 100.0(4) . 2_675 ?
O29 Fe9 O14 91.8(3) . 2_675 ?
O47 Fe9 O46 104.1(4) . . ?
O29 Fe9 O46 159.1(4) . . ?
O14 Fe9 O46 75.3(3) 2_675 . ?
O47 Fe9 O48 144.9(4) . . ?
O29 Fe9 O48 73.6(3) . . ?
O14 Fe9 O48 112.9(3) 2_675 . ?
O46 Fe9 O48 96.1(3) . . ?
O47 Fe9 N12 79.2(4) . . ?
O29 Fe9 N12 117.5(4) . . ?
O14 Fe9 N12 150.7(4) 2_675 . ?
O46 Fe9 N12 76.6(4) . . ?
O48 Fe9 N12 77.9(3) . . ?
O2 C1 O1 123.7(13) . . ?
O2 C1 C2 119.1(13) . . ?
O1 C1 C2 117.2(13) . . ?
C1 C2 C3 112.6(13) . . ?
C1 C2 C4 109.9(14) . . ?
C3 C2 C4 111.0(16) . . ?
O4 C5 O3 128(2) . . ?
O4 C5 C6 116(2) . . ?
O3 C5 C6 116(2) . . ?
C5 C6 C7 104.4(17) . . ?
C5 C6 C8 103.7(19) . . ?
C7 C6 C8 119(2) . . ?
O5 C9 O6 125.3(12) . . ?
O5 C9 C10 115.1(12) . . ?
O6 C9 C10 119.6(12) . . ?
C11 C10 C12 121(2) . . ?
C11 C10 C9 110.9(13) . . ?
C12 C10 C9 103.7(16) . . ?
O8 C13 O7 129(2) . . ?
O8 C13 C14 115(3) . . ?
O7 C13 C14 115(2) . . ?
C13 C14 C15 114(2) . . ?
C13 C14 C16 119(2) . . ?
C15 C14 C16 95(2) . . ?
O10 C17 O9 124.7(11) . . ?
O10 C17 C18 118.6(11) . . ?
O9 C17 C18 116.7(12) . . ?
C20 C18 C19 113.2(15) . . ?
C20 C18 C17 111.4(13) . . ?
C19 C18 C17 106.8(12) . . ?
O12 C21 O11 125.5(12) . . ?
O12 C21 C22 118.0(11) . . ?
O11 C21 C22 116.4(12) . . ?
C24 C22 C21 110.6(12) . . ?
C24 C22 C23 107.3(16) . . ?
C21 C22 C23 111.5(13) . . ?
N1 C25 C26 110.0(11) . . ?
O13 C26 C25 110.4(10) . . ?
C28 C27 N1 112.6(11) . . ?
O14 C28 C27 108.5(9) . . ?
C30 C29 N1 119.2(12) . . ?
O15 C30 C29 110.1(13) . . ?
N2 C31 C32 111.0(9) . . ?
O16 C32 C31 108.1(10) . . ?
C34 C33 N2 110.9(10) . . ?
O17 C34 C33 107.9(9) . . ?
N2 C35 C36 113.9(11) . . ?
O18 C36 C35 109.1(11) . . ?
N3 C37 C38 110.4(9) . . ?
O19 C38 C37 109.2(10) . . ?
N3 C39 C40 114.4(12) . . ?
O20 C40 C39 117.9(13) . . ?
N3 C41 C42 120.1(14) . . ?
O21 C42 C41 112.1(15) . . ?
N4 C43 C44 110.6(9) . . ?
O22 C44 C43 109.2(9) . . ?
C46 C45 N4 109.2(10) . . ?
O23 C46 C45 111.7(10) . . ?
N4 C47 C48 115.6(11) . . ?
O24 C48 C47 112.0(11) . . ?
N5 C49 C50 112.5(10) . . ?
O25 C50 C49 109.7(10) . . ?
N5 C51 C52 112.1(10) . . ?
O26 C52 C51 113.0(10) . . ?
N5 C53 C54' 135.4(13) . . ?
N5 C53 C54 117.1(14) . . ?
O27 C54 C53 109.6(16) . . ?
O27' C54' C53 138(2) . . ?
C56 C55 N6 110.4(11) . . ?
O28 C56 C55 111.8(13) . . ?
N6 C57 C58 112.9(11) . . ?
O29 C58 C57 109.2(12) . . ?
N6 C59 C60' 131(2) . . ?
N6 C59 C60 103.7(13) . . ?
O30 C60 C59 105.4(16) . . ?
O30' C60' C59 100(2) . . ?
N7 C61 C62 111.7(14) . . ?
O31 C62 C61 108.5(12) . . ?
N7 C63 C64 112.2(13) . . ?
O32 C64 C63 110.0(13) . . ?
C66 C65 N7 109.3(11) . . ?
O33 C66 C65 110.2(15) . . ?
N8 C67 C68 111.9(11) . . ?
O34 C68 C67 109.2(10) . . ?
N8 C69 C70 108.1(10) . . ?
O35 C70 C69 112.7(10) . . ?
N8 C71 C72 112.0(11) . . ?
O36 C72 C71 107.3(10) . . ?
N9 C73 C74 110.9(12) . . ?
O38 C74 C73 108.7(12) . . ?
N9 C75 C76 112.8(13) . . ?
O37 C76 C75 108.1(10) . . ?
N9 C77 C78 109.5(10) . . ?
O39 C78 C77 111.0(12) . . ?
C80 C79 N10 113.9(13) . . ?
O40 C80 C79 109.6(12) . . ?
C82 C81 N10 114.2(14) . . ?
O41 C82 C81 110.2(14) . . ?
N10 C83 C84 108.4(13) . . ?
O42 C84 C83 109.4(15) . . ?
N11 C85 C86 115.3(12) . . ?
C85 C86 O43 109.5(11) . . ?
N11 C87 C88 112.3(11) . . ?
O44 C88 C87 108.6(11) . . ?
N11 C89 C90 112.7(11) . . ?
O45 C90 C89 110.0(11) . . ?
C92 C91 N12 112.9(11) . . ?
O46 C92 C91 106.7(11) . . ?
N12 C93 C95 108.0(13) . . ?
N12 C94 C96 109.3(9) . . ?
O47 C95 C93 109.4(12) . . ?
O48 C96 C94 110.2(10) . . ?
C29 N1 C25 112.7(11) . . ?
C29 N1 C27 110.4(10) . . ?
C25 N1 C27 112.5(10) . . ?
C29 N1 Fe1 111.3(8) . . ?
C25 N1 Fe1 102.9(8) . . ?
C27 N1 Fe1 106.8(8) . . ?
C31 N2 C35 111.4(9) . . ?
C31 N2 C33 115.0(10) . . ?
C35 N2 C33 109.4(10) . . ?
C31 N2 Fe2 106.1(7) . . ?
C35 N2 Fe2 111.8(8) . . ?
C33 N2 Fe2 102.8(7) . . ?
C37 N3 C39 113.4(11) . . ?
C37 N3 C41 109.4(11) . . ?
C39 N3 C41 110.9(10) . . ?
C37 N3 Fe4 106.5(7) . . ?
C39 N3 Fe4 105.3(8) . . ?
C41 N3 Fe4 111.3(9) . . ?
C47 N4 C43 110.8(9) . . ?
C47 N4 C45 110.9(9) . . ?
C43 N4 C45 113.1(10) . . ?
C47 N4 Fe5 112.0(7) . . ?
C43 N4 Fe5 106.2(6) . . ?
C45 N4 Fe5 103.6(6) . . ?
C53 N5 C51 110.1(10) . . ?
C53 N5 C49 112.9(10) . . ?
C51 N5 C49 114.0(10) . . ?
C53 N5 Fe7 111.4(8) . . ?
C51 N5 Fe7 102.2(7) . . ?
C49 N5 Fe7 105.5(7) . . ?
C57 N6 C59 111.8(12) . . ?
C57 N6 C55 111.5(13) . . ?
C59 N6 C55 112.9(10) . . ?
C57 N6 Fe8 102.3(8) . . ?
C59 N6 Fe8 112.4(10) . . ?
C55 N6 Fe8 105.3(8) . . ?
C63 N7 C61 114.8(14) . . ?
C63 N7 C65 108.4(11) . . ?
C61 N7 C65 110.7(15) . . ?
C63 N7 Dy1 106.3(12) . . ?
C61 N7 Dy1 110.1(7) . . ?
C65 N7 Dy1 106.1(8) . . ?
C69 N8 C67 111.6(10) . . ?
C69 N8 C71 114.2(10) . . ?
C67 N8 C71 112.1(10) . . ?
C69 N8 Fe3 103.6(7) . . ?
C67 N8 Fe3 106.4(7) . . ?
C71 N8 Fe3 108.2(8) . . ?
C75 N9 C77 109.9(12) . . ?
C75 N9 C73 113.2(12) . . ?
C77 N9 C73 108.5(10) . . ?
C75 N9 Dy2 110.9(8) . . ?
C77 N9 Dy2 106.6(7) . . ?
C73 N9 Dy2 107.5(11) . . ?
C83 N10 C81 113.9(16) . . ?
C83 N10 C79 113.0(15) . . ?
C81 N10 C79 112.6(14) . . ?
C83 N10 Fe6 104.5(12) . . ?
C81 N10 Fe6 106.1(10) . . ?
C79 N10 Fe6 105.8(8) . . ?
C85 N11 C89 111.4(11) . . ?
C85 N11 C87 112.5(11) . . ?
C89 N11 C87 110.5(10) . . ?
C85 N11 Dy3 107.1(8) . . ?
C89 N11 Dy3 109.3(8) . . ?
C87 N11 Dy3 105.7(7) . . ?
C94 N12 C93 111.0(11) . . ?
C94 N12 C91 113.1(11) . . ?
C93 N12 C91 113.6(12) . . ?
C94 N12 Fe9 110.0(7) . . ?
C93 N12 Fe9 101.8(7) . . ?
C91 N12 Fe9 106.7(7) . . ?
N14 N13 Fe2 134.4(12) . . ?
N13 N14 N15 177.3(19) . . ?
N17 N16 Fe5 158.2(13) . . ?
N16 N17 N18 178.74(10) . . ?
N17' N16' Fe5 133.8(13) . . ?
N16' N17' N18' 178.74(18) . . ?
N20 N19 Fe8 130.4(11) . . ?
N19 N20 N21 178(2) . . ?
C1 O1 Fe1 126.1(8) . . ?
C1 O2 Dy1 139.0(9) . . ?
C5 O3 Dy1 134.4(13) . . ?
C9 O5 Fe4 126.1(9) . . ?
C9 O6 Dy2 136.8(9) . . ?
C13 O7 Dy2 136.0(15) . . ?
C17 O9 Fe7 124.4(8) . . ?
C17 O10 Dy3 138.6(7) . . ?
C21 O11 Dy3 136.1(8) . . ?
C26 O13 Fe1 118.6(7) . . ?
C26 O13 Dy1 133.2(7) . . ?
Fe1 O13 Dy1 102.3(4) . . ?
C28 O14 Fe9 122.0(7) . 2_675 ?
C28 O14 Fe1 111.0(6) . . ?
Fe9 O14 Fe1 104.3(3) 2_675 . ?
C32 O16 Fe2 112.1(7) . . ?
C32 O16 Dy1 128.2(6) . . ?
Fe2 O16 Dy1 106.9(3) . . ?
C34 O17 Fe2 122.5(6) . . ?
C34 O17 Fe3 130.7(6) . . ?
Fe2 O17 Fe3 106.7(3) . . ?
C38 O19 Fe3 122.5(7) . . ?
C38 O19 Fe4 110.9(7) . . ?
Fe3 O19 Fe4 103.8(3) . . ?
C40 O20 Fe4 117.7(8) . . ?
C40 O20 Dy2 130.5(9) . . ?
Fe4 O20 Dy2 102.9(4) . . ?
C44 O22 Fe5 112.2(6) . . ?
C44 O22 Dy2 127.9(7) . . ?
Fe5 O22 Dy2 107.5(3) . . ?
C46 O23 Fe5 121.1(7) . . ?
C46 O23 Fe6 131.8(7) . . ?
Fe5 O23 Fe6 106.8(3) . . ?
C50 O25 Fe6 124.2(7) . . ?
C50 O25 Fe7 111.8(7) . . ?
Fe6 O25 Fe7 104.7(4) . . ?
C52 O26 Fe7 118.9(7) . . ?
C52 O26 Dy3 132.1(7) . . ?
Fe7 O26 Dy3 102.7(3) . . ?
C56 O28 Fe8 111.6(7) . . ?
C56 O28 Dy3 129.7(7) . . ?
Fe8 O28 Dy3 107.6(4) . . ?
C58 O29 Fe9 130.5(9) . . ?
C58 O29 Fe8 121.6(8) . . ?
Fe9 O29 Fe8 107.6(4) . . ?
C62 O31 Fe2 128.0(8) . . ?
C62 O31 Dy1 121.4(8) . . ?
Fe2 O31 Dy1 109.1(4) . . ?
C64 O32 Dy1 124.2(10) . . ?
C66 O33 Fe1 125.2(8) . . ?
C66 O33 Dy1 121.6(8) . . ?
Fe1 O33 Dy1 104.8(4) . . ?
C68 O34 Fe4 133.8(7) . . ?
C68 O34 Fe3 120.9(7) . . ?
Fe4 O34 Fe3 104.3(3) . . ?
C70 O35 Fe3 119.9(6) . . ?
C72 O36 Fe2 122.7(7) . . ?
C72 O36 Fe3 116.6(7) . . ?
Fe2 O36 Fe3 105.0(3) . . ?
C76 O37 Fe5 126.4(8) . . ?
C76 O37 Dy2 122.5(7) . . ?
Fe5 O37 Dy2 110.3(4) . . ?
C74 O38 Dy2 125.5(8) . . ?
C78 O39 Fe4 124.6(7) . . ?
C78 O39 Dy2 122.0(6) . . ?
Fe4 O39 Dy2 104.1(4) . . ?
C80 O40 Fe7 133.9(8) . . ?
C80 O40 Fe6 119.8(8) . . ?
Fe7 O40 Fe6 104.9(4) . . ?
C82 O41 Fe5 121.7(8) . . ?
C82 O41 Fe6 115.4(9) . . ?
Fe5 O41 Fe6 104.5(3) . . ?
C84 O42 Fe6 121.4(10) . . ?
C86 O43 Dy3 124.6(8) . . ?
C88 O44 Fe7 126.3(8) . . ?
C88 O44 Dy3 121.8(7) . . ?
Fe7 O44 Dy3 104.0(3) . . ?
C90 O45 Fe8 130.2(7) . . ?
C90 O45 Dy3 119.3(7) . . ?
Fe8 O45 Dy3 109.9(4) . . ?
C92 O46 Fe1 132.8(8) . 2_675 ?
C92 O46 Fe9 122.3(8) . . ?
Fe1 O46 Fe9 104.7(3) 2_675 . ?
C95 O47 Fe9 121.5(8) . . ?
C96 O48 Fe9 115.5(7) . . ?
C96 O48 Fe8 121.7(7) . . ?
Fe9 O48 Fe8 104.7(3) . . ?
N22 C98 C97 174(4) . . ?
 
loop_
 _geom_hbond_atom_site_label_D 
 _geom_hbond_atom_site_label_H 
 _geom_hbond_atom_site_label_A 
 _geom_hbond_distance_DH 
 _geom_hbond_distance_HA 
 _geom_hbond_distance_DA 
 _geom_hbond_angle_DHA 
 _geom_hbond_site_symmetry_A 
O15 H15 N14  0.84 2.55 3.37(2) 165.8 1_455
O15 H15 N15  0.84 1.91 2.72(2) 162.7 1_455
O18 H18A O47  0.84 1.80 2.639(12) 173.5 2_675
O21 H21 O15  1.01 1.90 2.825(19) 150.1 1_655
O24 H24 O35  0.84 1.77 2.601(11) 169.9 .
O27' H27' O8  0.84 2.52 3.35(4) 172.8 2_776
O30 H30 O42  0.82 1.64 2.45(2) 165.7 .
O32 H32 O4  0.99 1.46 2.43(2) 162.0 .
O38 H38 O8  0.99 1.59 2.51(2) 150.9 .
O43 H43 O12  0.99 1.55 2.490(12) 155.8 .
O49 H49K O50  0.99 1.85 2.70(3) 141.4 1_565
O49 H49L O24  0.99 1.94 2.743(14) 135.7 .
C97 H97C N13  0.98 2.39 3.35(4) 166.8 .
C97 H97C N14  0.98 2.42 3.37(4) 163.3 .
 
_refine_diff_density_max    3.838
_refine_diff_density_min   -2.273
_refine_diff_density_rms    0.177

_shelx_res_file
;

    o365asb.res created by SHELXL-2014/7


TITL o365asb in P-1
CELL 0.71073  15.3106  23.0895  24.2933  78.069  81.833  76.573
ZERR    1.00   0.0015   0.0023   0.0024   0.003   0.003   0.003
LATT 1
SFAC C  H  N  O  Fe Dy
UNIT 194  409  43  105  18  6

omit 0   0   1
omit  0   1   1
omit  -1   0   1
omit  1  -1   2
omit     0   4   0
omit     1   5   3
omit    -2  -1   3
omit  0   3   2
omit -1   0   5
omit    -2   1   1
omit -3   0   4
omit  -2  -3   2
omit -3   2   1
omit    -1   5   1
EQIV $1 -x+1, -y+2, -z
EQIV $2 x, y+1, z
EQIV $3 x-1, y, z
EQIV $4 x+1, y, z
EQIV $5 -x+2, -y+2, -z+1

L.S. 20
ACTA
htab

HTAB O15 N14_$3
HTAB O15 N15_$3
HTAB O18 O47_$1
HTAB O21 O15_$4
HTAB O24 O35
HTAB O27' O8_$5
HTAB O30 O42
HTAB O4 O32
HTAB O32 O4
HTAB O38 O8
HTAB O43 O12
HTAB O49 O50_$2
HTAB O49 O24
HTAB C97 N13
HTAB C97 N14
FMAP 2
PLAN 10
size 0.16 0.27 0.28
sadi 0.01 c6 c8
sadi 0.001 n17 n18 n17 n18'
sadi 0.02 c60 o30 c60' o30'
sadi 0.02 c59 c60 c59 c60'
sadi 0.001 c54 o27 c54' o27'
DFIX 1.4 0.02 C60 O30
DFIX 1.51 0.02 C97 C98
DFIX 1.18 0.02 C98 N22
DFIX 2.75 N22 C97
DFIX 1.54 0.001 C53 C54  C53 C54'
DFIX 1.4 0.02 C54 O27  C54' O27'
DFIX 1.54 0.02 C6 C8
DFIX 1.54 0.02 C6 C7
DFIX 1.54 0.02 C5 C6
DFIX 1.54 0.01 C13 C14
DFIX 1.54 0.02 C10 C11  C10 C12
DFIX 1.54 0.02 C22 C24 C39 c40
SIMU $c
DELU $c
DELU 0.003 0.006 N18 N18'
DELU 0.003  O30 O30'
DELU 0.003 0.006 O51 O51'
DELU 0.003 0.006 O54 O54'
DELU 0.01 C54 C54'
DELU 0.001  O27 O27'
SIMU 0.003  O30 O30'
SIMU 0.003 0.006 N18 N18'
SIMU 0.003 0.006 O51 O51'
SIMU 0.003 0.006 O54 O54'
SIMU 0.04 C54 C54'
SIMU 0.001  O27 O27'
SIMU 0.003 0.006 c60 c60'
DELU 0.003 0.006 C60 C60'
ISOR 0.01 C8 c12 C13 C14 C16 O8
ISOR 0.01 C97 C98 N22
ISOR 0.005 O54 O54' O55 O56
ISOR 0.005 O51 O51' O57 O58
ISOR 0.001 O27
sadi 0.003 fe5 n16 fe5 n16'
eadp o27' o27
isor c27 c28
bump
temp -173
WGHT    0.120000   59.595154
FVAR       0.02485   0.62902   0.56142   0.52454   0.59839   0.64110
DY1   6    0.377803    0.585642    0.343634    11.00000    0.06876    0.02562 =
         0.04867    0.00420   -0.02025   -0.02029
DY2   6    0.802421    0.916312    0.445602    11.00000    0.05361    0.04579 =
         0.03769    0.01081   -0.02398   -0.02416
DY3   6    0.913858    1.347486    0.100081    11.00000    0.04662    0.02847 =
         0.03743   -0.01068    0.00185   -0.01974
FE1   5    0.261494    0.589743    0.235056    11.00000    0.05985    0.02658 =
         0.04066   -0.00443   -0.00896   -0.01623
FE2   5    0.524719    0.684179    0.313913    11.00000    0.05961    0.02145 =
         0.04704   -0.00663   -0.01297   -0.01358
FE3   5    0.544243    0.774669    0.393121    11.00000    0.04332    0.02457 =
         0.03274   -0.00181   -0.01018   -0.01192
FE4   5    0.718878    0.797047    0.434104    11.00000    0.04085    0.02818 =
         0.03519    0.00008   -0.01156   -0.00757
FE5   5    0.735819    1.045773    0.345400    11.00000    0.04502    0.02735 =
         0.03223   -0.00178   -0.01211   -0.01334
FE6   5    0.876435    1.114132    0.262457    11.00000    0.04244    0.02740 =
         0.03680    0.00365   -0.01433   -0.01346
FE7   5    0.881674    1.253081    0.223228    11.00000    0.04713    0.02744 =
         0.04130   -0.00908   -0.00110   -0.01593
FE8   5    0.868847    1.298337   -0.017378    11.00000    0.07594    0.02832 =
         0.03460   -0.00926   -0.00560   -0.02106
FE9   5    0.724005    1.377974   -0.101452    11.00000    0.06013    0.03056 =
         0.03928   -0.01471   -0.00160   -0.02096
C1    1    0.244403    0.490485    0.333752    11.00000    0.10179    0.05560 =
         0.04894    0.00231   -0.01548   -0.04480
C2    1    0.201175    0.440424    0.363503    11.00000    0.11576    0.05121 =
         0.05061    0.01091   -0.02434   -0.05195
AFIX  13
H2    2    0.203742    0.412847    0.336266    11.00000   -1.20000
AFIX   0
C3    1    0.248881    0.403656    0.413674    11.00000    0.21607    0.10863 =
         0.11347    0.07356   -0.09644   -0.12864
AFIX 137
H3A   2    0.209013    0.408344    0.448497    11.00000   -1.50000
H3B   2    0.303949    0.417867    0.415022    11.00000   -1.50000
H3C   2    0.264662    0.360876    0.410088    11.00000   -1.50000
AFIX   0
C4    1    0.100202    0.465492    0.381441    11.00000    0.14457    0.06821 =
         0.09912   -0.00227    0.04672   -0.05614
AFIX 137
H4A   2    0.095669    0.491277    0.409534    11.00000   -1.50000
H4B   2    0.070431    0.431703    0.397862    11.00000   -1.50000
H4C   2    0.070794    0.489315    0.348244    11.00000   -1.50000
AFIX   0
C5    1    0.267470    0.584521    0.472678    11.00000    0.12986    0.09621 =
         0.09532   -0.00564   -0.00221   -0.05227
C6    1    0.182979    0.612230    0.505055    11.00000    0.18841    0.08735 =
         0.10100   -0.04897    0.00666   -0.04397
AFIX  13
H6    2    0.172044    0.657352    0.494489    11.00000   -1.20000
AFIX   0
C7    1    0.107606    0.588911    0.485660    11.00000    0.11413    0.18789 =
         0.17756   -0.07906   -0.00037   -0.01757
AFIX 137
H7A   2    0.133005    0.566066    0.455225    11.00000   -1.50000
H7B   2    0.060347    0.623371    0.471850    11.00000   -1.50000
H7C   2    0.081701    0.562519    0.517613    11.00000   -1.50000
AFIX   0

C8    1    0.204598    0.591756    0.568909    11.00000    0.21435    0.17257 =
         0.11336   -0.05545    0.00100   -0.03130
AFIX 137
H8A   2    0.195583    0.627548    0.586481    11.00000   -1.50000
H8B   2    0.267369    0.569613    0.570408    11.00000   -1.50000
H8C   2    0.164217    0.565440    0.589341    11.00000   -1.50000
AFIX   0

part 0
C9    1    0.815769    0.780208    0.534662    11.00000    0.06827    0.05102 =
         0.07651    0.02421   -0.04092   -0.02978
C10   1    0.858703    0.736691    0.585366    11.00000    0.15499    0.07814 =
         0.07256    0.03528   -0.06554   -0.06793
AFIX  13
H10   2    0.866455    0.694752    0.577777    11.00000   -1.20000
AFIX   0
C11   1    0.951339    0.746010    0.589207    11.00000    0.15856    0.16472 =
         0.14350    0.06173   -0.12403   -0.04975
AFIX 137
H11A  2    0.946257    0.783274    0.603845    11.00000   -1.50000
H11B  2    0.984757    0.749293    0.551558    11.00000   -1.50000
H11C  2    0.983470    0.711544    0.614723    11.00000   -1.50000
AFIX   0
C12   1    0.785560    0.743367    0.633819    11.00000    0.20178    0.17869 =
         0.09721    0.04127   -0.02840    0.00418
AFIX 137
H12A  2    0.797465    0.708070    0.664120    11.00000   -1.50000
H12B  2    0.726918    0.746234    0.620541    11.00000   -1.50000
H12C  2    0.784863    0.780129    0.648216    11.00000   -1.50000
AFIX   0
C13   1    1.021543    0.892437    0.460511    11.00000    0.10557    0.13764 =
         0.12055   -0.00433   -0.02714   -0.05162
C14   1    1.112765    0.854940    0.441217    11.00000    0.12733    0.14945 =
         0.17284   -0.00554   -0.02931   -0.03374
AFIX  13
H14   2    1.161475    0.863859    0.459530    11.00000   -1.20000
AFIX   0
C15   1    1.136530    0.866182    0.374037    11.00000    0.05836    0.13082 =
         0.19691    0.00798    0.00262   -0.01517
AFIX  33
H15A  2    1.195502    0.840944    0.364511    11.00000   -1.50000
H15B  2    1.090288    0.855557    0.356220    11.00000   -1.50000
H15C  2    1.138346    0.908926    0.360257    11.00000   -1.50000
AFIX   0
C16   1    1.124720    0.778687    0.448471    11.00000    0.14375    0.14054 =
         0.22495    0.02897   -0.03727   -0.03162
AFIX  33
H16A  2    1.186289    0.760920    0.434414    11.00000   -1.20000
H16B  2    1.113149    0.761239    0.488473    11.00000   -1.20000
H16C  2    1.081605    0.769987    0.426703    11.00000   -1.20000
AFIX   0
C17   1    0.966483    1.353241    0.230122    11.00000    0.04942    0.02779 =
         0.05462   -0.00948   -0.01289   -0.01509
C18   1    0.993847    1.391512    0.265157    11.00000    0.09607    0.03070 =
         0.06563   -0.00469   -0.03607   -0.02279
AFIX  13
H18   2    1.002178    1.367234    0.303921    11.00000   -1.20000
AFIX   0
C19   1    0.917168    1.444133    0.269596    11.00000    0.13734    0.08273 =
         0.18658   -0.08642   -0.08679    0.01427
AFIX 137
H19A  2    0.924167    1.463763    0.300350    11.00000   -1.50000
H19B  2    0.860245    1.430050    0.277442    11.00000   -1.50000
H19C  2    0.916679    1.473181    0.233915    11.00000   -1.50000
AFIX   0
C20   1    1.079664    1.409473    0.240774    11.00000    0.11908    0.09896 =
         0.09361   -0.02418   -0.04096   -0.07293
AFIX 137
H20A  2    1.126833    1.373171    0.237520    11.00000   -1.50000
H20B  2    1.097072    1.432689    0.265396    11.00000   -1.50000
H20C  2    1.072053    1.434480    0.203221    11.00000   -1.50000
AFIX   0
C21   1    0.827130    1.496021    0.099749    11.00000    0.06264    0.04105 =
         0.03745   -0.01689    0.00170   -0.01729
C22   1    0.745797    1.538541    0.122161    11.00000    0.07047    0.04339 =
         0.06210   -0.02192    0.00475   -0.01047
AFIX  13
H22   2    0.738586    1.528029    0.164372    11.00000   -1.20000
AFIX   0
C23   1    0.755190    1.604390    0.104529    11.00000    0.09638    0.04965 =
         0.24089   -0.03923    0.05782   -0.01007
AFIX 137
H23A  2    0.731930    1.621246    0.067714    11.00000   -1.50000
H23B  2    0.818951    1.606364    0.101778    11.00000   -1.50000
H23C  2    0.720720    1.627830    0.132778    11.00000   -1.50000
AFIX   0
C24   1    0.663983    1.533500    0.100142    11.00000    0.07324    0.08594 =
         0.11891   -0.05102   -0.02835    0.02059
AFIX 137
H24A  2    0.662219    1.555132    0.060967    11.00000   -1.50000
H24B  2    0.610680    1.551271    0.123301    11.00000   -1.50000
H24C  2    0.664401    1.490731    0.101450    11.00000   -1.50000
AFIX   0
C25   1    0.090489    0.638725    0.296247    11.00000    0.06854    0.06499 =
         0.04451   -0.01677   -0.00577   -0.01715
AFIX  23
H25A  2    0.084877    0.599674    0.321051    11.00000   -1.20000
H25B  2    0.031421    0.667197    0.299185    11.00000   -1.20000
AFIX   0
C26   1    0.161645    0.663836    0.315316    11.00000    0.07120    0.05418 =
         0.04202   -0.02139   -0.00651   -0.01057
AFIX  23
H26A  2    0.153612    0.707672    0.299708    11.00000   -1.20000
H26B  2    0.154758    0.658647    0.357081    11.00000   -1.20000
AFIX   0

C27   1    0.105133    0.688568    0.194989    11.00000    0.07536    0.04238 =
         0.03671   -0.01304   -0.01406   -0.00525
AFIX  23
H27A  2    0.082918    0.683146    0.160440    11.00000   -1.20000
H27B  2    0.059364    0.719781    0.211666    11.00000   -1.20000
AFIX   0
C28   1    0.191582    0.710268    0.179119    11.00000    0.08148    0.02399 =
         0.03595    0.00060   -0.02179   -0.01329
AFIX  23
H28A  2    0.186909    0.741521    0.144360    11.00000   -1.20000
H28B  2    0.204338    0.728431    0.209846    11.00000   -1.20000
AFIX   0
C29   1    0.065388    0.588399    0.220927    11.00000    0.06751    0.04554 =
         0.04783   -0.01249   -0.00261   -0.02451
AFIX  23
H29A  2    0.092655    0.579468    0.183342    11.00000   -1.20000
H29B  2    0.076522    0.549769    0.248174    11.00000   -1.20000
AFIX   0
C30   1   -0.031946    0.607688    0.218394    11.00000    0.08158    0.07315 =
         0.06467   -0.00702   -0.02176   -0.02394
AFIX  23
H30A  2   -0.046664    0.650383    0.198959    11.00000   -1.20000
H30B  2   -0.052501    0.582544    0.196470    11.00000   -1.20000
AFIX   0
C31   1    0.370262    0.743749    0.241657    11.00000    0.05587    0.02605 =
         0.04012   -0.00980   -0.01433   -0.01245
AFIX  23
H31A  2    0.347372    0.713981    0.226643    11.00000   -1.20000
H31B  2    0.343511    0.784747    0.222024    11.00000   -1.20000
AFIX   0
C32   1    0.341664    0.738367    0.304529    11.00000    0.06831    0.02270 =
         0.03503   -0.00511   -0.01491   -0.01353
AFIX  23
H32A  2    0.349952    0.774175    0.318037    11.00000   -1.20000
H32B  2    0.277148    0.736187    0.312329    11.00000   -1.20000
AFIX   0
C33   1    0.507619    0.789248    0.216712    11.00000    0.08643    0.03227 =
         0.03048    0.00144   -0.01390   -0.02488
AFIX  23
H33A  2    0.572319    0.778602    0.202965    11.00000   -1.20000
H33B  2    0.476137    0.818508    0.186240    11.00000   -1.20000
AFIX   0
C34   1    0.497592    0.818112    0.268262    11.00000    0.08263    0.02398 =
         0.03581    0.00435   -0.02032   -0.02501
AFIX  23
H34A  2    0.538486    0.846794    0.262637    11.00000   -1.20000
H34B  2    0.434812    0.840689    0.274965    11.00000   -1.20000
AFIX   0
C35   1    0.501595    0.696461    0.184366    11.00000    0.07047    0.05255 =
         0.04762   -0.02819   -0.00649   -0.01954
AFIX  23
H35A  2    0.482116    0.657341    0.195911    11.00000   -1.20000
H35B  2    0.568395    0.687612    0.180024    11.00000   -1.20000
AFIX   0
C36   1    0.468062    0.727309    0.127820    11.00000    0.08844    0.06586 =
         0.04524   -0.02375    0.00286   -0.04558
AFIX  23
H36A  2    0.401356    0.734783    0.130974    11.00000   -1.20000
H36B  2    0.486421    0.766771    0.115794    11.00000   -1.20000
AFIX   0
C37   1    0.768378    0.718937    0.344073    11.00000    0.04572    0.03423 =
         0.05096   -0.01946   -0.00497    0.00270
AFIX  23
H37A  2    0.726489    0.690735    0.351617    11.00000   -1.20000
H37B  2    0.817820    0.704934    0.315789    11.00000   -1.20000
AFIX   0
C38   1    0.718379    0.782260    0.320691    11.00000    0.04909    0.03412 =
         0.04447   -0.01073   -0.00316   -0.00260
AFIX  23
H38A  2    0.761903    0.808944    0.306498    11.00000   -1.20000
H38B  2    0.685575    0.780991    0.288801    11.00000   -1.20000
AFIX   0
C39   1    0.897208    0.730427    0.387186    11.00000    0.05618    0.07560 =
         0.13157   -0.05390   -0.00771   -0.00519
AFIX  23
H39A  2    0.926660    0.718268    0.351128    11.00000   -1.20000
H39B  2    0.932338    0.704736    0.417880    11.00000   -1.20000
AFIX   0
C40   1    0.900950    0.793852    0.385167    11.00000    0.03864    0.04868 =
         0.26601   -0.00536    0.01846   -0.00414
AFIX  23
H40A  2    0.947793    0.794223    0.409227    11.00000   -1.20000
H40B  2    0.921482    0.810757    0.345872    11.00000   -1.20000
AFIX   0
C41   1    0.803162    0.660103    0.435312    11.00000    0.07770    0.04022 =
         0.08851   -0.00012   -0.01087    0.00293
AFIX  23
H41A  2    0.739551    0.661005    0.450787    11.00000   -1.20000
H41B  2    0.837235    0.658723    0.467442    11.00000   -1.20000
AFIX   0
C42   1    0.837694    0.602235    0.414310    11.00000    0.08036    0.05108 =
         0.11546   -0.00094    0.02658    0.02165
AFIX  23
H42A  2    0.831805    0.568067    0.445815    11.00000   -1.20000
H42B  2    0.800494    0.600394    0.384797    11.00000   -1.20000
AFIX   0
C43   1    0.719034    0.940824    0.292448    11.00000    0.05291    0.02913 =
         0.02997   -0.00150   -0.00594   -0.01093
AFIX  23
H43A  2    0.718570    0.933655    0.253707    11.00000   -1.20000
H43B  2    0.695961    0.908087    0.319474    11.00000   -1.20000
AFIX   0
C44   1    0.816056    0.939476    0.303129    11.00000    0.04938    0.04175 =
         0.03464   -0.00761    0.00482   -0.00678
AFIX  23
H44A  2    0.850981    0.897216    0.308849    11.00000   -1.20000
H44B  2    0.845826    0.962955    0.269979    11.00000   -1.20000
AFIX   0
C45   1    0.645785    1.043331    0.243804    11.00000    0.07548    0.03710 =
         0.04700    0.00732   -0.03489   -0.02891
AFIX  23
H45A  2    0.628799    1.022690    0.216293    11.00000   -1.20000
H45B  2    0.596433    1.078454    0.249523    11.00000   -1.20000
AFIX   0
C46   1    0.730190    1.064131    0.221748    11.00000    0.08016    0.03852 =
         0.03736    0.00909   -0.02554   -0.03154
AFIX  23
H46A  2    0.772032    1.032805    0.202961    11.00000   -1.20000
H46B  2    0.716825    1.101477    0.193102    11.00000   -1.20000
AFIX   0
C47   1    0.572619    0.992032    0.330237    11.00000    0.04728    0.02949 =
         0.05302   -0.00273   -0.02597   -0.01132
AFIX  23
H47A  2    0.538345    1.031729    0.338600    11.00000   -1.20000
H47B  2    0.584310    0.964798    0.366845    11.00000   -1.20000
AFIX   0
C48   1    0.514318    0.966485    0.300541    11.00000    0.05265    0.04289 =
         0.05036   -0.00696   -0.01846   -0.01974
AFIX  23
H48A  2    0.497319    0.995238    0.265557    11.00000   -1.20000
H48B  2    0.549285    0.928082    0.289597    11.00000   -1.20000
AFIX   0
C49   1    0.700149    1.241299    0.288602    11.00000    0.05054    0.04367 =
         0.05568    0.00268    0.00608   -0.00435
AFIX  23
H49A  2    0.637707    1.265367    0.292212    11.00000   -1.20000
H49B  2    0.707027    1.208236    0.321910    11.00000   -1.20000
AFIX   0
C50   1    0.715011    1.213909    0.235103    11.00000    0.03179    0.04134 =
         0.04732    0.01087   -0.00513   -0.01702
AFIX  23
H50A  2    0.681912    1.180715    0.240770    11.00000   -1.20000
H50B  2    0.691514    1.245171    0.203150    11.00000   -1.20000
AFIX   0
C51   1    0.731037    1.344669    0.265054    11.00000    0.05309    0.03131 =
         0.05328   -0.00156    0.00958   -0.00521
AFIX  23
H51A  2    0.768374    1.369367    0.276005    11.00000   -1.20000
H51B  2    0.668227    1.357628    0.281471    11.00000   -1.20000
AFIX   0
C52   1    0.733498    1.355883    0.202399    11.00000    0.04904    0.03310 =
         0.05206    0.00207   -0.00227    0.00292
AFIX  23
H52A  2    0.678837    1.346395    0.192011    11.00000   -1.20000
H52B  2    0.732140    1.399360    0.187675    11.00000   -1.20000
AFIX   0
C53   1    0.794647    1.274895    0.342680    11.00000    0.08625    0.04345 =
         0.06407   -0.00116   -0.01101   -0.00814
part 1
AFIX  23
H53A  2    0.830296    1.306180    0.340322    21.00000   -1.20000
H53B  2    0.836034    1.234967    0.350947    21.00000   -1.20000
AFIX  23
part 2
H53C  2    0.745997    1.302474    0.361813   -21.00000   -1.20000
H53D  2    0.846361    1.295371    0.334171   -21.00000   -1.20000
AFIX   0

PART 1
C54   1    0.721748    1.280473    0.393071    21.00000    0.10556    0.08326 =
         0.06321    0.01842    0.00014    0.01103
AFIX  23
H54A  2    0.685287    1.249415    0.396606    21.00000   -1.20000
H54B  2    0.750705    1.273613    0.428459    21.00000   -1.20000
PART 2
AFIX   0
C54'  1    0.824245    1.221936    0.390832   -21.00000    0.09970    0.06179 =
         0.07589    0.01410   -0.03313   -0.02667
AFIX  23
H54C  2    0.788271    1.192541    0.387460   -21.00000   -1.20000
H54D  2    0.886619    1.204554    0.376466   -21.00000   -1.20000
PART 0
AFIX   0
C55   1    0.759666    1.233577    0.083502    11.00000    0.12995    0.07910 =
         0.04283   -0.00266   -0.01103   -0.09001
AFIX  23
H55A  2    0.705317    1.216041    0.088129    11.00000   -1.20000
H55B  2    0.789753    1.219172    0.118771    11.00000   -1.20000
AFIX   0
C56   1    0.732887    1.300150    0.073512    11.00000    0.08637    0.08354 =
         0.04692   -0.03055    0.00773   -0.05711
AFIX  23
H56A  2    0.686568    1.313533    0.046368    11.00000   -1.20000
H56B  2    0.705726    1.313528    0.109469    11.00000   -1.20000
AFIX   0
C57   1    0.775157    1.195651   -0.006688    11.00000    0.15803    0.04911 =
         0.04443    0.00112   -0.02880   -0.06187
AFIX  23
H57A  2    0.738917    1.166083    0.013906    11.00000   -1.20000
H57B  2    0.819700    1.175667   -0.034309    11.00000   -1.20000
AFIX   0
C58   1    0.714781    1.248297   -0.037598    11.00000    0.11136    0.04547 =
         0.04952   -0.00310   -0.01387   -0.05252
AFIX  23
H58A  2    0.699624    1.237807   -0.072094    11.00000   -1.20000
H58B  2    0.658003    1.259420   -0.013426    11.00000   -1.20000
AFIX   0
C59   1    0.902626    1.162727    0.052659    11.00000    0.19487    0.03052 =
         0.04646    0.01029   -0.04305   -0.02209
part 1
AFIX  23
H59A  2    0.934395    1.174444    0.080050    31.00000   -1.20000
H59B  2    0.946030    1.152883    0.019924    31.00000   -1.20000
AFIX  23
part 2
H59C  2    0.911238    1.168986    0.090468   -31.00000   -1.20000
H59D  2    0.955234    1.173636    0.027332   -31.00000   -1.20000
AFIX   0
PART 1
C60   1    0.859044    1.109356    0.080257    31.00000    0.15435    0.03425 =
         0.03010   -0.00579   -0.02423   -0.01487
AFIX  23
H60A  2    0.809011    1.121435    0.108956    31.00000   -1.20000
H60B  2    0.835051    1.094051    0.051577    31.00000   -1.20000
PART 2  -31.00
AFIX   0
C60'  1    0.917258    1.094466    0.058231   -31.00000    0.15442    0.03413 =
         0.03052   -0.00577   -0.02483   -0.01486
AFIX  23
H60C  2    0.903376    1.082889    0.023923   -31.00000   -1.20000
H60D  2    0.979610    1.073999    0.066445   -31.00000   -1.20000
PART 0
AFIX   0
C61   1    0.592639    0.498943    0.315385    11.00000    0.08358    0.02999 =
         0.12126   -0.01601   -0.04000    0.01333
AFIX  23
H61A  2    0.611098    0.509629    0.274465    11.00000   -1.20000
H61B  2    0.635322    0.461820    0.330900    11.00000   -1.20000
AFIX   0
C62   1    0.597559    0.549626    0.344173    11.00000    0.07554    0.02258 =
         0.13954   -0.01707   -0.04004    0.00244
AFIX  23
H62A  2    0.593755    0.535821    0.385665    11.00000   -1.20000
H62B  2    0.655585    0.562604    0.331767    11.00000   -1.20000
AFIX   0
C63   1    0.484105    0.439203    0.369298    11.00000    0.12986    0.03158 =
         0.15550    0.00927   -0.04879   -0.01613
AFIX  23
H63A  2    0.532234    0.402761    0.366069    11.00000   -1.20000
H63B  2    0.425711    0.428817    0.366924    11.00000   -1.20000
AFIX   0
C64   1    0.482904    0.456864    0.426400    11.00000    0.13332    0.04077 =
         0.13240    0.04021   -0.04963   -0.02095
AFIX  23
H64A  2    0.451120    0.430607    0.456051    11.00000   -1.20000
H64B  2    0.545529    0.451014    0.435864    11.00000   -1.20000
AFIX   0
C65   1    0.476309    0.472059    0.270481    11.00000    0.09572    0.02972 =
         0.14744   -0.03330   -0.05519    0.00612
AFIX  23
H65A  2    0.527685    0.443249    0.254945    11.00000   -1.20000
H65B  2    0.423237    0.452901    0.279151    11.00000   -1.20000
AFIX   0
C66   1    0.456064    0.528840    0.228153    11.00000    0.08392    0.04391 =
         0.11201   -0.04862   -0.03848    0.01803
AFIX  23
H66A  2    0.510843    0.546059    0.217160    11.00000   -1.20000
H66B  2    0.437965    0.519771    0.193843    11.00000   -1.20000
AFIX   0
C67   1    0.473816    0.753652    0.516792    11.00000    0.06163    0.05739 =
         0.04654   -0.00661   -0.00935   -0.02553
AFIX  23
H67A  2    0.447725    0.727764    0.549751    11.00000   -1.20000
H67B  2    0.450684    0.796374    0.521162    11.00000   -1.20000
AFIX   0
C68   1    0.575464    0.738829    0.515968    11.00000    0.06080    0.05542 =
         0.03785    0.00171   -0.01840   -0.02807
AFIX  23
H68A  2    0.593710    0.757797    0.544311    11.00000   -1.20000
H68B  2    0.597292    0.694467    0.525698    11.00000   -1.20000
AFIX   0
C69   1    0.360150    0.784575    0.451209    11.00000    0.03580    0.04410 =
         0.03585   -0.00132   -0.00765   -0.01175
AFIX  23
H69A  2    0.315869    0.783841    0.485138    11.00000   -1.20000
H69B  2    0.335261    0.771751    0.421318    11.00000   -1.20000
AFIX   0
C70   1    0.377565    0.847219    0.431112    11.00000    0.04329    0.03460 =
         0.05482   -0.00783   -0.00318   -0.00874
AFIX  23
H70A  2    0.327198    0.872381    0.409847    11.00000   -1.20000
H70B  2    0.379067    0.865514    0.464311    11.00000   -1.20000
AFIX   0
C71   1    0.445969    0.679705    0.465613    11.00000    0.07281    0.04554 =
         0.04608    0.01350   -0.01735   -0.03076
AFIX  23
H71A  2    0.397468    0.676866    0.443965    11.00000   -1.20000
H71B  2    0.433708    0.659472    0.505152    11.00000   -1.20000
AFIX   0
C72   1    0.536005    0.647110    0.440579    11.00000    0.07841    0.04349 =
         0.06209    0.00828   -0.02660   -0.02245
AFIX  23
H72A  2    0.581962    0.638800    0.467624    11.00000   -1.20000
H72B  2    0.530195    0.608113    0.432104    11.00000   -1.20000
AFIX   0
C73   1    0.729953    0.939597    0.580573    11.00000    0.16278    0.11903 =
         0.03223   -0.00359   -0.01841   -0.09918
AFIX  23
H73A  2    0.753242    0.895876    0.593719    11.00000   -1.20000
H73B  2    0.687648    0.955498    0.611386    11.00000   -1.20000
AFIX   0
C74   1    0.808008    0.972284    0.567265    11.00000    0.19502    0.15077 =
         0.05368   -0.00024   -0.04457   -0.12472
AFIX  23
H74A  2    0.785024    1.016218    0.566296    11.00000   -1.20000
H74B  2    0.850118    0.956920    0.596906    11.00000   -1.20000
AFIX   0
C75   1    0.630134    1.009056    0.513832    11.00000    0.11379    0.05670 =
         0.03591   -0.02625    0.01644   -0.05057
AFIX  23
H75A  2    0.613724    1.028077    0.547880    11.00000   -1.20000
H75B  2    0.573494    1.007525    0.499479    11.00000   -1.20000
AFIX   0
C76   1    0.682533    1.048416    0.468517    11.00000    0.09577    0.05859 =
         0.04028   -0.01737    0.01243   -0.04441
AFIX  23
H76A  2    0.641155    1.085902    0.452359    11.00000   -1.20000
H76B  2    0.729808    1.059860    0.485407    11.00000   -1.20000
AFIX   0
C77   1    0.619220    0.904578    0.540901    11.00000    0.10208    0.06813 =
         0.02368   -0.01627    0.01307   -0.04838
AFIX  23
H77A  2    0.563791    0.920528    0.564173    11.00000   -1.20000
H77B  2    0.649266    0.865307    0.562129    11.00000   -1.20000
AFIX   0
C78   1    0.595025    0.895666    0.485775    11.00000    0.06726    0.05576 =
         0.04057   -0.02742    0.00876   -0.01772
AFIX  23
H78A  2    0.558621    0.864103    0.493176    11.00000   -1.20000
H78B  2    0.558004    0.933834    0.467066    11.00000   -1.20000
AFIX   0
C79   1    1.066449    1.099586    0.292585    11.00000    0.05236    0.09761 =
         0.07967    0.05711   -0.03247   -0.03467
AFIX  23
H79A  2    1.110215    1.084046    0.321244    11.00000   -1.20000
H79B  2    1.100691    1.099146    0.254851    11.00000   -1.20000
AFIX   0
C80   1    1.022156    1.162998    0.297121    11.00000    0.07081    0.09705 =
         0.05384    0.02588   -0.03379   -0.05564
AFIX  23
H80A  2    1.008841    1.166923    0.337431    11.00000   -1.20000
H80B  2    1.063090    1.190369    0.278672    11.00000   -1.20000
AFIX   0
C81   1    0.974448    1.037378    0.361020    11.00000    0.06586    0.16094 =
         0.11008    0.10129   -0.06241   -0.06100
AFIX  23
H81A  2    0.962177    0.996307    0.365609    11.00000   -1.20000
H81B  2    1.025164    1.034330    0.383331    11.00000   -1.20000
AFIX   0
C82   1    0.894841    1.076641    0.384036    11.00000    0.10892    0.16800 =
         0.04415    0.03522   -0.04312   -0.11160
AFIX  23
H82A  2    0.869900    1.054787    0.420114    11.00000   -1.20000
H82B  2    0.911807    1.112789    0.391838    11.00000   -1.20000
AFIX   0
C83   1    1.032284    1.010730    0.269071    11.00000    0.06652    0.03318 =
         0.20021    0.02306    0.00132    0.01131
AFIX  23
H83A  2    0.994773    0.979893    0.281606    11.00000   -1.20000
H83B  2    1.095764    0.990974    0.274993    11.00000   -1.20000
AFIX   0
C84   1    1.024370    1.037607    0.206819    11.00000    0.08257    0.04513 =
         0.17421   -0.02052    0.03659   -0.00729
AFIX  23
H84A  2    1.074775    1.058334    0.191411    11.00000   -1.20000
H84B  2    1.027851    1.004951    0.185329    11.00000   -1.20000
AFIX   0
C85   1    1.131359    1.357748    0.092288    11.00000    0.05491    0.04257 =
         0.09465   -0.02690    0.00632   -0.02788
AFIX  23
H85A  2    1.197134    1.346659    0.081659    11.00000   -1.20000
H85B  2    1.122607    1.363120    0.132232    11.00000   -1.20000
AFIX   0
C86   1    1.095469    1.415679    0.057190    11.00000    0.06580    0.04389 =
         0.09096   -0.02954    0.01258   -0.02830
AFIX  23
H86A  2    1.126177    1.417423    0.018347    11.00000   -1.20000
H86B  2    1.106795    1.449260    0.072885    11.00000   -1.20000
AFIX   0
C87   1    1.112222    1.256208    0.135153    11.00000    0.04454    0.05616 =
         0.05538   -0.00926   -0.00409   -0.01249
AFIX  23
H87A  2    1.111104    1.271417    0.170531    11.00000   -1.20000
H87B  2    1.173757    1.232554    0.126746    11.00000   -1.20000
AFIX   0
C88   1    1.045823    1.215363    0.143801    11.00000    0.04714    0.05305 =
         0.05021   -0.00940    0.00241   -0.01179
AFIX  23
H88A  2    1.051424    1.195993    0.110358    11.00000   -1.20000
H88B  2    1.058316    1.183125    0.177286    11.00000   -1.20000
AFIX   0
C89   1    1.119360    1.289040    0.032721    11.00000    0.05825    0.04216 =
         0.05700   -0.01085    0.02160   -0.01199
AFIX  23
H89A  2    1.125356    1.244660    0.038042    11.00000   -1.20000
H89B  2    1.179214    1.298253    0.017865    11.00000   -1.20000
AFIX   0
C90   1    1.053714    1.319281   -0.009633    11.00000    0.07264    0.04427 =
         0.04555   -0.01834    0.01657   -0.01932
AFIX  23
H90A  2    1.057869    1.362265   -0.022046    11.00000   -1.20000
H90B  2    1.068530    1.299401   -0.043180    11.00000   -1.20000
AFIX   0
C91   1    0.666207    1.513520   -0.105192    11.00000    0.08369    0.04363 =
         0.08156   -0.03543   -0.02673   -0.00501
AFIX  23
H91A  2    0.601772    1.518487   -0.110465    11.00000   -1.20000
H91B  2    0.673333    1.550324   -0.092915    11.00000   -1.20000
AFIX   0
C92   1    0.720835    1.508050   -0.159801    11.00000    0.09613    0.02467 =
         0.06945   -0.01847   -0.02730   -0.01282
AFIX  23
H92A  2    0.690333    1.536732   -0.190988    11.00000   -1.20000
H92B  2    0.780819    1.517061   -0.159271    11.00000   -1.20000
AFIX   0
C93   1    0.615634    1.447759   -0.017709    11.00000    0.05316    0.08618 =
         0.10253   -0.06863    0.00821   -0.02593
AFIX  23
H93A  2    0.584719    1.484967   -0.002989    11.00000   -1.20000
H93B  2    0.638130    1.416299    0.014385    11.00000   -1.20000
AFIX   0
C94   1    0.769264    1.463068   -0.032611    11.00000    0.05994    0.03067 =
         0.04801   -0.01818   -0.01085   -0.01554
AFIX  23
H94A  2    0.763792    1.442544    0.007373    11.00000   -1.20000
H94B  2    0.771030    1.505826   -0.033413    11.00000   -1.20000
AFIX   0
C95   1    0.550280    1.425993   -0.046593    11.00000    0.06413    0.10722 =
         0.12071   -0.08279    0.00832   -0.03384
AFIX  23
H95A  2    0.508157    1.406768   -0.017742    11.00000   -1.20000
H95B  2    0.514443    1.460860   -0.070565    11.00000   -1.20000
AFIX   0
C96   1    0.854787    1.432501   -0.063180    11.00000    0.06335    0.01735 =
         0.04076   -0.00257   -0.00988   -0.01580
AFIX  23
H96E  2    0.869283    1.459276   -0.099144    11.00000   -1.20000
H96F  2    0.905440    1.425022   -0.039677    11.00000   -1.20000
AFIX   0
N1    3    0.115471    0.629550    0.236726    11.00000    0.06599    0.04081 =
         0.03628   -0.00582   -0.00885   -0.01541
N2    3    0.468689    0.732935    0.230307    11.00000    0.06434    0.03272 =
         0.04019   -0.01591   -0.00101   -0.02051
N3    3    0.805764    0.718548    0.396482    11.00000    0.03479    0.03585 =
         0.06448   -0.00363   -0.01042    0.00080
N4    3    0.659372    1.000254    0.299174    11.00000    0.04859    0.03035 =
         0.03893    0.00386   -0.02272   -0.01857
N5    3    0.764398    1.280703    0.288378    11.00000    0.05868    0.02514 =
         0.04089   -0.00046    0.00141   -0.00522
N6    3    0.823805    1.212503    0.034014    11.00000    0.13243    0.05834 =
         0.04307   -0.00798   -0.01889   -0.06047
N7    3    0.499253    0.486610    0.323412    11.00000    0.11390    0.01468 =
         0.10585    0.00741   -0.05499   -0.01265
N8    3    0.444485    0.744225    0.464609    11.00000    0.05457    0.04334 =
         0.02736    0.00231   -0.00789   -0.02521
N9    3    0.680893    0.948034    0.529509    11.00000    0.10864    0.05076 =
         0.02893   -0.00714   -0.01005   -0.04599
N10   3    1.002460    1.058154    0.300648    11.00000    0.03958    0.07087 =
         0.11144    0.05449   -0.03911   -0.03074
N11   3    1.091853    1.308521    0.088273    11.00000    0.05002    0.03423 =
         0.05060   -0.00643    0.00512   -0.02023
N12   3    0.691858    1.460268   -0.060106    11.00000    0.04318    0.05117 =
         0.06048   -0.03289    0.00413   -0.01225
N13   3    0.646534    0.674227    0.269070    11.00000    0.08140    0.02744 =
         0.08771   -0.03515   -0.01136    0.00052
N14   3    0.699223    0.634612    0.259225    11.00000    0.09023    0.09809 =
         0.06810   -0.03492   -0.00254   -0.05129
N15   3    0.759579    0.592638    0.247565    11.00000    0.10050    0.10501 =
         0.15186   -0.07010    0.00292    0.02433
isor 0.005 n16
isor 0.05 n17
eadp  n16 n16'
eadp  n17 n17'
part 1
AFIX   6
N16   3    0.624377    1.110758    0.339605    41.00000    0.04330    0.03960 =
         0.03777   -0.01084   -0.00721   -0.00215
N17   3    0.566214    1.146055    0.353454    41.00000    0.05024    0.03987 =
         0.10675    0.02167    0.00899   -0.01365
N18   3    0.503334    1.184382    0.369592    41.00000    0.12105    0.08733 =
         0.11519   -0.00943    0.02574   -0.00458
PART 2
AFIX   6
N16'  3    0.628886    1.106897    0.367927   -41.00000    0.04330    0.03960 =
         0.03777   -0.01084   -0.00721   -0.00215
N17'  3    0.572276    1.137941    0.344896   -41.00000    0.05024    0.03987 =
         0.10675    0.02167    0.00899   -0.01365
N18'  3    0.509311    1.171639    0.320679   -41.00000    0.11839    0.08530 =
         0.11121   -0.01067    0.02438   -0.00552
AFIX   0
PART 0
N19   3    0.952005    1.246587   -0.068489    11.00000    0.10464    0.03734 =
         0.05114   -0.00938   -0.04282    0.01469
N20   3    1.018647    1.214633   -0.061458    11.00000    0.15222    0.06486 =
         0.04653   -0.01186   -0.00410   -0.02208
N21   3    1.091387    1.181235   -0.053572    11.00000    0.14876    0.08661 =
         0.10327   -0.00477   -0.03824    0.00559
O1    4    0.226595    0.513089    0.282947    11.00000    0.08649    0.03587 =
         0.04608    0.00012   -0.01648   -0.02644
O2    4    0.294525    0.509166    0.359224    11.00000    0.10414    0.04163 =
         0.05601    0.01705   -0.02876   -0.04520
O3    4    0.282389    0.611629    0.421452    11.00000    0.10573    0.06779 =
         0.04287    0.00135   -0.01182   -0.05614
O4    4    0.310258    0.536124    0.496470    11.00000    0.24653    0.11252 =
         0.05046   -0.00082    0.01368   -0.04125
O5    4    0.769135    0.758387    0.509179    11.00000    0.05040    0.04893 =
         0.05177    0.00618   -0.02469   -0.01648
O6    4    0.830124    0.833748    0.521386    11.00000    0.08425    0.06495 =
         0.06363    0.02860   -0.04982   -0.03571
O7    4    0.958153    0.895498    0.431671    11.00000    0.05007    0.08884 =
         0.10008    0.05062   -0.04930   -0.03342
O8    4    1.018970    0.910524    0.502069    11.00000    0.13639    0.25689 =
         0.16509   -0.01636   -0.08770   -0.07645
O9    4    0.946617    1.303637    0.256218    11.00000    0.06338    0.03522 =
         0.06201   -0.01203   -0.00220   -0.02946
O10   4    0.964730    1.372138    0.177758    11.00000    0.05725    0.03710 =
         0.04071   -0.01182   -0.00531   -0.02243
O11   4    0.817906    1.441434    0.100693    11.00000    0.04995    0.03222 =
         0.03715   -0.00753   -0.00106   -0.01312
O12   4    0.896265    1.514794    0.084119    11.00000    0.06004    0.03205 =
         0.09585   -0.01520    0.01938   -0.02524
O13   4    0.248338    0.633852    0.296949    11.00000    0.06136    0.02912 =
         0.03919   -0.00490   -0.01151   -0.01484

O14   4    0.262960    0.659528    0.169708    11.00000    0.06833    0.02681 =
         0.03592   -0.01013   -0.00088   -0.02156
O15   4   -0.078397    0.601747    0.275198    11.00000    0.08182    0.13231 =
         0.09488   -0.06762    0.00955   -0.02596
AFIX   3
H15   2   -0.132828    0.602876    0.272299    11.00000   -1.20000
AFIX   0
O16   4    0.395184    0.685524    0.332458    11.00000    0.05554    0.01537 =
         0.04104   -0.00035   -0.01346   -0.01125
O17   4    0.519859    0.771045    0.315367    11.00000    0.07209    0.02367 =
         0.03180   -0.00349   -0.01977   -0.01342
O18   4    0.505020    0.689836    0.087548    11.00000    0.08197    0.09786 =
         0.06611   -0.05240    0.02389   -0.05850
AFIX   3
H18A  2    0.470484    0.666308    0.087830    11.00000   -1.20000
AFIX   0
O19   4    0.657020    0.805184    0.363793    11.00000    0.04111    0.02873 =
         0.03498   -0.00764    0.00035   -0.01220
O20   4    0.823394    0.832217    0.401611    11.00000    0.03601    0.03289 =
         0.05510    0.00316   -0.00266   -0.00334
O21   4    0.927740    0.595992    0.391912    11.00000    0.11295    0.07835 =
         0.13308   -0.02547   -0.03536    0.02502
AFIX   3
H21   2    0.929412    0.612232    0.349744    11.00000   -1.20000
AFIX   0
O22   4    0.814054    0.964199    0.350618    11.00000    0.03605    0.03858 =
         0.03525   -0.00169   -0.00762   -0.01200
O23   4    0.771727    1.075708    0.264585    11.00000    0.05430    0.03937 =
         0.03283    0.00855   -0.01776   -0.02424
O24   4    0.435423    0.955640    0.334937    11.00000    0.05113    0.02795 =
         0.06118    0.00321   -0.01508   -0.01287
AFIX   3
H24   2    0.447043    0.922184    0.356920    11.00000   -1.20000
AFIX   0
O25   4    0.807722    1.191363    0.222500    11.00000    0.04094    0.03743 =
         0.05167    0.00129   -0.01585   -0.01498
O26   4    0.809588    1.321620    0.176779    11.00000    0.04397    0.02795 =
         0.03866   -0.01245    0.00181   -0.01003
PART 1
O27   4    0.666890    1.337241    0.384919    21.00000    0.12285    0.12223 =
         0.12099   -0.02156   -0.00990   -0.02420
AFIX   3
H27   2    0.631213    1.336114    0.411471    21.00000   -1.20000
PART 2
AFIX   0
O27'  4    0.829345    1.212434    0.448171   -21.00000    0.12285    0.12223 =
         0.12099   -0.02156   -0.00990   -0.02420
AFIX   3
H27'  2    0.868686    1.181114    0.457465   -21.00000   -1.50000
AFIX   0

PART 0
O28   4    0.805881    1.327133    0.052312    11.00000    0.05370    0.04387 =
         0.03859   -0.01337    0.00140   -0.02711
O29   4    0.758927    1.297886   -0.052592    11.00000    0.09244    0.04050 =
         0.03999   -0.00560   -0.00616   -0.03998
PART 1
O30   4    0.928263    1.064953    0.105657    31.00000    0.13476    0.04591 =
         0.04133   -0.00926   -0.01677    0.00013
AFIX   3
H30   2    0.926344    1.066233    0.139298    31.00000   -1.20000
PART 2
AFIX   0
O30'  4    0.855021    1.082213    0.103997   -31.00000    0.12915    0.04721 =
         0.03928   -0.01383   -0.01785   -0.00239
AFIX   3
H30'  2    0.834402    1.112021    0.118818   -31.00000   -1.20000
PART 0
AFIX   0
O31   4    0.524903    0.598446    0.329778    11.00000    0.06671    0.02177 =
         0.07080    0.00009   -0.02170   -0.01126
O32   4    0.436896    0.520645    0.424803    11.00000    0.10352    0.06468 =
         0.07923    0.03052   -0.04798   -0.04447
AFIX   3
H32   2    0.384527    0.519082    0.453874    11.00000   -1.20000
AFIX   0

O33   4    0.384912    0.571918    0.251330    11.00000    0.06149    0.03198 =
         0.05715   -0.01315   -0.00876   -0.01577
O34   4    0.613368    0.760514    0.462213    11.00000    0.04285    0.04337 =
         0.03083    0.00182   -0.01226   -0.01880
O35   4    0.458218    0.847884    0.396733    11.00000    0.04714    0.03123 =
         0.03361   -0.00263   -0.00498   -0.01550
O36   4    0.562002    0.685732    0.389770    11.00000    0.06354    0.01862 =
         0.04035    0.00632   -0.01101   -0.01203
O37   4    0.722191    1.014679    0.425894    11.00000    0.06769    0.04541 =
         0.02965   -0.01423   -0.00195   -0.02559
O38   4    0.855556    0.961614    0.511659    11.00000    0.14965    0.12471 =
         0.05865    0.02616   -0.05548   -0.10201
AFIX   3
H38   2    0.915386    0.936120    0.520442    11.00000   -1.20000
AFIX   0

O39   4    0.673362    0.878201    0.449545    11.00000    0.05372    0.03834 =
         0.02639   -0.00364   -0.00603   -0.01942
O40   4    0.941056    1.179520    0.270718    11.00000    0.05933    0.04320 =
         0.04113   -0.00260   -0.01729   -0.02085
O41   4    0.828476    1.094896    0.345136    11.00000    0.06312    0.06218 =
         0.03673    0.00097   -0.01999   -0.03999
O42   4    0.941168    1.079355    0.200958    11.00000    0.07287    0.03696 =
         0.06576   -0.01419    0.00650   -0.00885
O43   4    0.997262    1.422322    0.055734    11.00000    0.05580    0.04456 =
         0.06624   -0.03087    0.02071   -0.02990
AFIX   3
H43   2    0.969544    1.458401    0.073218    11.00000   -1.20000
AFIX   0

O44   4    0.956694    1.250958    0.151954    11.00000    0.04222    0.03346 =
         0.04372   -0.00831   -0.00114   -0.01672
O45   4    0.966087    1.315712    0.014134    11.00000    0.06053    0.03783 =
         0.03981   -0.01387    0.00555   -0.01980
O46   4    0.730172    1.446964   -0.167380    11.00000    0.07896    0.02245 =
         0.05205   -0.01240   -0.01010   -0.01604
O47   4    0.599131    1.384070   -0.080019    11.00000    0.06420    0.06363 =
         0.07090   -0.04685    0.00412   -0.02490
O48   4    0.844113    1.376358   -0.074607    11.00000    0.06835    0.03036 =
         0.04060   -0.01222   -0.00221   -0.02493
O49   4    0.280770    0.987311    0.281185    11.00000    0.04973    0.10742 =
         0.23838    0.02437   -0.06168   -0.00085
AFIX   3
H49K  2    0.249621    1.027173    0.261405    11.00000   -1.50000
H49L  2    0.345621    0.987273    0.281205    11.00000   -1.50000
AFIX   0
O50   4    0.273210    0.096810    0.214325    10.50000    0.09522    0.10891 =
         0.10252    0.01278    0.02541   -0.03742
PART 1  50.50
O51   4    0.538425    0.748894    0.978179    50.50000    0.06076    0.07443 =
         0.06424   -0.00477   -0.00382   -0.01470
PART 2  -50.50
O51'  4    0.617186    0.729068    0.989345   -50.50000    0.06070    0.07444 =
         0.06455   -0.00530   -0.00355   -0.01464
PART 1
O54   4    0.697506    0.916849    0.141641    20.50000    0.13442    0.13230 =
         0.12521   -0.03001   -0.01716   -0.02724
PART 2
O54'  4    0.633791    0.904243    0.157908   -20.50000    0.13385    0.13176 =
         0.12508   -0.02983   -0.01663   -0.02777
PART 0
C97   1    0.774592    0.747297    0.167525    10.50000    0.06595    0.08466 =
         0.10251   -0.03510   -0.00655    0.02991
AFIX 137
H97C  2    0.746327    0.721193    0.198591    10.50000   -1.20000
H97D  2    0.806425    0.723434    0.138948    10.50000   -1.20000
H97G  2    0.728017    0.780188    0.150403    10.50000   -1.20000
AFIX   0
C98   1    0.841358    0.773808    0.190242    10.50000    0.08839    0.08646 =
         0.08429   -0.00916    0.00554   -0.00596
N22   3    0.888083    0.795583    0.212683    10.50000    0.10576    0.14314 =
         0.10823   -0.02650    0.01494   -0.00429
O55   4    0.247969    0.103083    0.096543    10.50000    0.18173    0.18250 =
         0.18123   -0.02287   -0.00720   -0.02936
O56   4    0.545814    0.153267    0.111389    10.50000    0.16980    0.18187 =
         0.18542   -0.02545   -0.02698   -0.04098
O57   4    0.685662    0.061968    0.084266    10.25000    0.09685    0.09800 =
         0.09030   -0.01507   -0.01271   -0.02241
O58   4    0.477475    0.312385    0.343509    10.25000    0.10548    0.09334 =
         0.10200   -0.01717   -0.01026   -0.01802
HKLF 4

REM  o365asb in P-1
REM R1 =  0.0763 for   16655 Fo > 4sig(Fo)  and  0.1287 for all   26768 data
REM   1766 parameters refined using    642 restraints

END

WGHT      0.1065     62.3871

REM Instructions for potential hydrogen bonds
HTAB C26 O3
HTAB C27 N19_$1
HTAB C28 O29_$1
HTAB C29 O46_$1
HTAB C29 O1
HTAB C32 O13
HTAB C35 N13
HTAB C37 N13
HTAB C37 O36
HTAB C38 O17
HTAB C40 O7
HTAB C43 O19
HTAB C44 O20
HTAB C47 N16
HTAB C47 N17'
HTAB C50 O23
HTAB C52 O11
HTAB C53 O9
HTAB C54' O41
HTAB C55 O25
HTAB C56 O26
HTAB C59 N20
HTAB C59 N19
HTAB C59 N20
HTAB C59 N21
HTAB C60 O57_$2
HTAB C62 O32
HTAB C62 N13
HTAB C62 N14
HTAB C62 N15
EQIV $6 x, y-1, z
HTAB C63 O27_$6
HTAB C63 O58
HTAB C63 O2
HTAB C66 O46_$1
EQIV $7 -x+1, -y+2, -z+1
HTAB C69 O27'_$7
HTAB C72 O31
HTAB C73 O6
HTAB C76 N16'
HTAB C78 O34
HTAB C81 O7
HTAB C81 O22
HTAB C82 O37
HTAB C85 O10
HTAB C90 O43
HTAB C90 N19
HTAB C90 N20
HTAB C94 O11
HTAB C94 O28
HTAB C96 O45
HTAB O15 N14_$3
HTAB O15 N15_$3
HTAB O18 O47_$1
HTAB O21 O15_$4
HTAB O24 O35
HTAB O27' O8_$5
HTAB O30 O42
HTAB O4 O32
HTAB O32 O4
HTAB O38 O8
HTAB O43 O12
HTAB O49 O50_$2
HTAB O49 O24
HTAB C97 N13
HTAB C97 N14

REM Highest difference peak  3.838,  deepest hole -2.273,  1-sigma level  0.177
Q1    1   0.3452  0.6066  0.3661  11.00000  0.05    3.84
Q2    1   0.8589  1.3777  0.0899  11.00000  0.05    2.16
Q3    1   0.8400  0.9097  0.4154  11.00000  0.05    2.14
Q4    1   0.4366  0.5922  0.3336  11.00000  0.05    2.02
Q5    1   0.8245  0.9336  0.4603  11.00000  0.05    1.83
Q6    1   0.3194  0.6208  0.3345  11.00000  0.05    1.79
Q7    1   0.7467  0.9532  0.4398  11.00000  0.05    1.65
Q8    1   0.2615  0.5692  0.6020  11.00000  0.05    1.49
Q9    1   0.3322  0.6024  0.3201  11.00000  0.05    1.41
Q10   1   0.7173  1.3625  0.3879  11.00000  0.05    1.31
;
_shelx_res_checksum   28570

_shelx_hkl_file
;
  -2   0   0   19.90    1.46
  -2   0   0   20.47    1.78
  -2   0   0   23.85    1.89
  -2   0   0   24.54    1.89
  -2   0   0   22.74    1.64
   2   0   0   22.64    1.65
   2   0   0   20.01    1.46
   2   0   0   20.88    1.77
  -3   0   0   26.42    2.41
  -3   0   0   29.62    2.55
  -3   0   0   29.34    2.54
  -3   0   0   32.31    2.23
  -3   0   0   28.81    1.98
   3   0   0   29.53    1.98
   3   0   0   31.72    2.24
   3   0   0   26.93    2.40
  -4   0   0    4.47    0.37
  -4   0   0    4.34    0.58
  -4   0   0    4.30    0.51
  -4   0   0    5.06    0.44
  -4   0   0    4.78    0.51
   4   0   0    4.28    0.48
   4   0   0    4.68    0.37
   4   0   0    4.69    0.48
  -5   0   0   19.07    1.90
  -5   0   0   20.28    1.41
  -5   0   0   18.99    1.75
   5   0   0   21.51    1.41
   5   0   0   17.87    1.70
   5   0   0   22.99    1.66
  -6   0   0   13.11    0.98
  -6   0   0   14.18    1.43
  -6   0   0   12.93    1.25
   6   0   0   13.16    1.20
   6   0   0   13.73    1.20
  -7   0   0    1.85    0.40
  -7   0   0    2.22    0.30
  -7   0   0    1.93    0.56
   7   0   0    2.12    0.38
   7   0   0    2.12    0.47
  -8   0   0    2.35    0.41
  -8   0   0    2.87    0.36
  -8   0   0    2.33    0.65
   8   0   0    2.84    0.45
   8   0   0    2.78    0.55
  -9   0   0    4.47    0.50
  -9   0   0    5.03    0.47
  -9   0   0    3.30    0.82
   9   0   0    3.75    0.56
   9   0   0    5.46    0.79
 -10   0   0    2.91    0.79
 -10   0   0    3.58    0.45
  10   0   0    3.02    0.47
  10   0   0    3.44    0.69
 -11   0   0   18.60    1.47
 -11   0   0   21.05    2.27
  11   0   0   19.75    1.73
  11   0   0   19.87    1.88
 -12   0   0    2.99    1.02
 -12   0   0    3.24    0.47
  12   0   0    4.38    0.91
  12   0   0    4.49    0.52
 -13   0   0    2.18    0.39
 -13   0   0    2.03    0.94
  13   0   0    2.22    0.75
 -14   0   0   -0.48    0.89
 -14   0   0    0.72    0.20
  14   0   0    0.70    0.63
 -15   0   0    1.52    0.93
  15   0   0    0.29    0.58
 -16   0   0    0.30    0.81
  16   0   0    0.29    0.55
 -17   0   0    0.50    0.99
  17   0   0    0.59    0.92
  17  -1   0   -0.72    0.40
 -17   1   0    1.03    1.08
  16  -1   0    0.03    0.47
 -16   1   0    0.79    0.95
  15  -1   0    0.88    0.57
 -15   1   0    1.64    1.03
  14  -1   0   -0.47    0.48
 -14   1   0    0.19    0.19
 -14   1   0   -0.27    0.87
  13  -1   0    3.56    0.91
 -13   1   0    3.77    1.22
 -13   1   0    3.87    0.55
  12  -1   0    2.04    0.65
 -12   1   0    2.25    0.42
 -12   1   0    2.32    1.00
  11  -1   0    0.26    0.17
  11  -1   0   -0.06    0.37
 -11   1   0    0.39    0.59
 -11   1   0   -0.01    0.16
  10  -1   0   -0.32    0.25
  10  -1   0   -0.08    0.16
 -10   1   0    0.15    0.46
 -10   1   0    0.06    0.13
   9  -1   0    0.15    0.29
   9  -1   0   -0.11    0.19
  -9   1   0    0.18    0.17
  -9   1   0   -0.27    0.39
  -9   1   0    0.15    0.16
   8  -1   0   15.71    1.48
   8  -1   0   14.72    1.41
  -8   1   0   15.92    1.22
  -8   1   0   18.10    1.82
  -8   1   0   17.72    1.53
   7  -1   0   41.42    3.27
   7  -1   0   37.47    3.39
  -7   1   0   41.91    2.87
  -7   1   0   41.53    3.78
  -7   1   0   45.47    3.52
   6  -1   0   23.07    1.82
   6  -1   0   20.87    1.85
  -6   1   0   22.64    2.14
  -6   1   0   20.77    1.55
  -6   1   0   22.95    1.94
   5  -1   0   15.97    1.30
   5  -1   0   14.24    1.26
   5  -1   0   12.93    1.08
  -5   1   0   14.40    1.09
  -5   1   0   16.47    1.36
  -5   1   0   18.05    1.54
   4  -1   0    5.56    0.60
   4  -1   0    6.56    0.50
   4  -1   0    7.04    0.61
  -4   1   0    6.60    0.64
  -4   1   0    6.30    0.75
  -4   1   0    6.80    0.51
   3  -1   0   17.12    1.26
   3  -1   0   15.14    1.10
  -3   1   0   14.55    1.10
  -3   1   0   17.81    1.26
  -3   1   0   15.14    1.34
   2  -1   0   50.60    3.64
   2  -1   0   46.30    3.28
   2  -1   0   49.46    4.13
  -2   1   0   52.78    3.64
  -2   1   0   46.65    3.28
  -1  -1   0   94.16    5.79
  -1  -1   0   97.04    6.42
  -1  -1   0   85.64    6.98
   1   1   0   83.51    7.22
   1   1   0   77.34    5.79
  -2  -1   0    3.26    0.29
  -2  -1   0    3.37    0.33
  -2  -1   0    2.70    0.21
  -2  -1   0    2.73    0.30
   2   1   0    3.24    0.31
   2   1   0    2.68    0.29
   2   1   0    2.59    0.21
  -3  -1   0    5.15    0.63
  -3  -1   0    8.28    0.61
  -3  -1   0    6.88    0.48
   3   1   0    7.58    0.62
   3   1   0    7.02    0.48
   3   1   0    4.87    0.62
  -4  -1   0   40.76    3.24
  -4  -1   0   35.45    2.50
  -4  -1   0   35.30    3.08
   4   1   0   38.53    2.85
   4   1   0   35.52    2.50
   4   1   0   38.12    3.06
  -5  -1   0    6.10    0.70
  -5  -1   0    7.51    0.53
  -5  -1   0    5.95    0.78
   5   1   0    7.80    0.71
   5   1   0    8.00    0.54
   5   1   0    5.37    0.67
  -6  -1   0   11.43    1.17
  -6  -1   0   12.08    1.32
  -6  -1   0   12.97    0.92
   6   1   0   13.57    1.17
   6   1   0   13.15    0.91
   6   1   0   11.42    1.15
  -7  -1   0   10.41    0.83
  -7  -1   0   11.36    1.09
  -7  -1   0   11.56    1.29
   7   1   0   11.09    1.07
   7   1   0   10.65    1.09
  -8  -1   0    3.21    0.40
  -8  -1   0    3.33    0.39
  -8  -1   0    3.48    0.70
   8   1   0    2.90    0.50
   8   1   0    4.61    0.70
  -9  -1   0    6.97    0.63
  -9  -1   0    5.98    1.08
   9   1   0    7.33    0.99
   9   1   0    8.12    0.81
 -10  -1   0    0.55    0.44
 -10  -1   0    0.15    0.16
  10   1   0    0.02    0.21
  10   1   0   -0.54    0.26
 -11  -1   0    1.11    0.25
 -11  -1   0    0.88    0.62
  11   1   0    1.17    0.35
  11   1   0    1.48    0.59
 -12  -1   0    0.31    0.16
 -12  -1   0    0.91    0.59
  12   1   0   -0.45    0.39
  12   1   0    0.64    0.28
 -13  -1   0    5.67    0.55
 -13  -1   0    6.14    1.31
  13   1   0    4.21    0.98
 -14  -1   0    0.85    0.19
 -14  -1   0    0.78    0.82
  14   1   0    0.62    0.63
 -15  -1   0    1.07    1.07
  15   1   0   -0.09    0.61
 -16  -1   0    0.64    0.84
  16   1   0    0.57    0.53
 -17  -1   0    1.96    0.92
  17   1   0    0.54    1.20
  16  -2   0    2.80    0.88
 -16   2   0    3.93    1.22
  15  -2   0    0.27    0.45
 -15   2   0    0.41    0.92
 -15   2   0    0.20    0.17
  14  -2   0    0.07    0.69
 -14   2   0    0.38    0.24
 -14   2   0    0.64    0.90
  13  -2   0    0.22    0.49
 -13   2   0   -0.58    0.74
 -13   2   0    0.34    0.22
  12  -2   0    6.39    1.05
 -12   2   0    6.53    1.30
 -12   2   0    6.09    0.65
  11  -2   0    1.04    0.50
 -11   2   0    1.25    0.31
 -11   2   0    0.71    0.64
  10  -2   0    5.79    0.59
  10  -2   0    6.22    0.92
 -10   2   0    6.33    0.62
 -10   2   0    5.71    1.12
   9  -2   0   10.53    1.01
   9  -2   0   12.98    1.20
  -9   2   0   12.25    0.95
  -9   2   0   10.57    1.46
   8  -2   0    1.67    0.43
   8  -2   0    1.13    0.26
  -8   2   0    1.27    0.29
  -8   2   0    2.30    0.36
  -8   2   0    0.56    0.52
   7  -2   0    1.05    0.34
   7  -2   0    1.74    0.27
  -7   2   0    1.38    0.29
  -7   2   0    1.04    0.25
  -7   2   0    1.26    0.55
   6  -2   0   11.90    1.05
   6  -2   0   10.53    1.00
  -6   2   0   11.73    0.89
  -6   2   0   11.90    1.30
   5  -2   0   18.41    1.47
  -5   2   0   17.11    1.29
  -5   2   0   18.35    1.75
   4  -2   0    7.67    0.69
   4  -2   0    7.50    0.58
  -4   2   0    7.75    0.60
   3  -2   0   10.08    0.73
   3  -2   0    8.05    0.62
   3  -2   0    7.11    0.83
  -3   2   0    8.22    0.63
   2  -2   0   34.80    2.91
   2  -2   0   35.16    2.55
  -2   2   0   33.92    2.56
  -2   2   0   32.36    2.30
  -2   2   0   33.65    2.90
   1  -2   0  104.57    7.08
   1  -2   0  101.96    7.82
   1  -2   0  110.78    8.48
   1  -2   0  116.04    8.84
  -1   2   0  106.93    8.48
  -1   2   0  106.29    7.09
  -1   2   0   98.16    7.83
  -1   2   0  108.04    8.83
   0  -2   0    5.84    0.47
   0  -2   0    5.73    0.39
   0  -2   0    4.67    0.47
   0   2   0    5.41    0.48
   0   2   0    5.15    0.47
  -1  -2   0  188.92   15.99
  -1  -2   0  183.50   15.46
  -1  -2   0  189.26   12.84
   1   2   0  207.17   14.24
   1   2   0  188.49   12.84
   1   2   0  207.91   15.99
  -2  -2   0   36.47    2.59
  -2  -2   0   34.32    2.87
  -2  -2   0   30.00    2.77
  -2  -2   0   33.77    2.27
   2   2   0   32.76    2.77
   2   2   0   34.35    2.27
   2   2   0   34.44    2.87
   2   2   0   34.25    2.59
  -3  -2   0   65.83    5.95
  -3  -2   0   73.64    4.90
  -3  -2   0   77.17    6.18
  -3  -2   0   80.38    5.50
  -3  -2   0   73.11    4.89
   3   2   0   74.69    5.50
   3   2   0   71.40    6.17
   3   2   0   73.40    5.95
  -4  -2   0    0.47    0.08
  -4  -2   0    0.43    0.17
  -4  -2   0    0.37    0.19
  -4  -2   0    0.81    0.16
   4   2   0    0.42    0.18
   4   2   0    0.33    0.16
   4   2   0    0.41    0.18
  -5  -2   0   17.23    1.25
  -5  -2   0   17.90    1.60
  -5  -2   0   19.81    1.72
   5   2   0   17.95    1.52
   5   2   0   18.70    1.60
   5   2   0   17.57    1.25
  -6  -2   0   15.23    1.39
  -6  -2   0   14.96    1.52
  -6  -2   0   15.07    1.07
   6   2   0   14.81    1.07
   6   2   0   15.61    1.36
   6   2   0   14.73    1.37
  -7  -2   0    3.52    0.36
  -7  -2   0    3.22    0.65
   7   2   0    3.22    0.61
   7   2   0    3.78    0.57
  -8  -2   0    0.98    0.21
  -8  -2   0    0.85    0.46
   8   2   0    0.74    0.31
   8   2   0    0.74    0.37
  -9  -2   0    1.50    0.51
  -9  -2   0    0.90    0.22
   9   2   0    0.92    0.46
   9   2   0    1.55    0.38
 -10  -2   0   13.86    1.10
 -10  -2   0   15.00    1.71
  10   2   0   14.57    1.49
  10   2   0   15.05    1.40
 -11  -2   0    0.34    0.15
 -11  -2   0    0.08    0.40
  11   2   0    0.22    0.45
  11   2   0    0.01    0.27
 -12  -2   0    0.72    0.18
 -12  -2   0    1.20    0.67
  12   2   0    1.06    0.34
  12   2   0    0.22    0.48
 -13  -2   0    0.24    0.64
 -13  -2   0    0.26    0.14
  13   2   0   -0.36    0.44
 -14  -2   0    0.19    0.15
 -14  -2   0    0.35    0.76
  14   2   0    0.42    0.46
 -15  -2   0   -0.32    0.77
  15   2   0   -0.52    0.56
 -16  -2   0    1.62    0.95
  16   2   0    0.18    0.43
 -17  -2   0    1.81    0.91
  17   2   0    0.16    0.68
  16  -3   0    0.99    0.61
 -16   3   0    1.83    1.16
  15  -3   0   -0.79    0.37
 -15   3   0   -0.18    0.19
 -15   3   0    1.01    0.89
  14  -3   0    0.92    0.61
 -14   3   0    1.69    1.01
 -14   3   0    0.77    0.27
  13  -3   0   -0.24    0.44
 -13   3   0   -0.46    0.72
 -13   3   0   -0.48    0.21
  12  -3   0    2.00    0.65
 -12   3   0    0.93    0.37
 -12   3   0    1.01    0.78
  11  -3   0    1.48    0.58
 -11   3   0    2.79    0.86
 -11   3   0    2.78    0.47
  10  -3   0    7.15    1.00
 -10   3   0    8.36    0.76
 -10   3   0    6.98    1.29
   9  -3   0   10.00    1.15
  -9   3   0   11.95    0.99
  -9   3   0   14.04    1.55
   8  -3   0    1.90    0.45
  -8   3   0    1.48    0.61
  -8   3   0    1.69    0.33
   7  -3   0   14.10    1.23
  -7   3   0   11.82    1.51
  -7   3   0   13.06    1.04
   6  -3   0    0.62    0.28
  -6   3   0    0.14    0.35
  -6   3   0    0.44    0.19
   5  -3   0   13.69    1.17
  -5   3   0   13.82    1.04
   4  -3   0    2.09    0.41
   4  -3   0    1.53    0.28
  -4   3   0    1.91    0.25
   3  -3   0   13.92    1.07
   3  -3   0   12.29    1.23
  -3   3   0   14.09    1.08
  -3   3   0   12.61    0.95
  -3   3   0   11.73    1.21
   2  -3   0   33.46    2.86
   2  -3   0   36.71    2.54
   2  -3   0   31.45    2.27
   2  -3   0   32.50    2.67
  -2   3   0   35.18    2.29
  -2   3   0   31.10    2.86
  -2   3   0   33.26    2.55
   1  -3   0    2.26    0.22
   1  -3   0    1.87    0.20
   1  -3   0    2.29    0.27
   1  -3   0    1.49    0.28
  -1   3   0    2.29    0.21
  -1   3   0    2.30    0.22
  -1   3   0    1.25    0.26
  -1   3   0    1.96    0.26
   0  -3   0   62.41    4.62
   0  -3   0   58.66    3.84
   0  -3   0   57.75    4.77
   0  -3   0   51.36    4.30
   0   3   0   54.22    4.77
   0   3   0   63.73    4.62
   0   3   0   50.10    4.30
   0   3   0   58.62    3.84
  -1  -3   0   74.37    5.66
  -1  -3   0   72.90    5.03
  -1  -3   0   78.19    6.27
  -1  -3   0   74.73    6.08
   1   3   0   74.35    5.03
   1   3   0   74.41    5.66
   1   3   0   78.74    6.27
   1   3   0   77.26    6.08
  -2  -3   0   27.30    2.28
  -2  -3   0   28.04    2.45
  -2  -3   0   29.02    1.99
  -2  -3   0   31.52    2.52
   2   3   0   32.75    2.52
   2   3   0   29.27    1.99
   2   3   0   28.69    2.45
  -3  -3   0   13.15    1.32
  -3  -3   0   16.46    1.27
  -3  -3   0   14.91    1.36
  -3  -3   0   15.13    1.03
   3   3   0   16.67    1.38
   3   3   0   14.03    1.27
   3   3   0   14.82    1.33
   3   3   0   14.97    1.03
  -4  -3   0   14.20    1.37
  -4  -3   0   11.75    1.30
  -4  -3   0   15.94    1.02
  -4  -3   0   14.43    1.01
  -4  -3   0   17.86    1.28
   4   3   0   14.72    1.39
   4   3   0   15.33    1.28
   4   3   0   13.30    1.31
  -5  -3   0    0.45    0.21
  -5  -3   0    0.33    0.08
  -5  -3   0    0.14    0.07
  -5  -3   0    0.18    0.06
   5   3   0    0.34    0.19
   5   3   0    0.39    0.20
  -6  -3   0   28.02    1.86
  -6  -3   0   25.66    2.47
  -6  -3   0   27.69    1.85
   6   3   0   27.50    2.24
   6   3   0   24.82    2.32
  -7  -3   0   39.42    2.70
  -7  -3   0   38.99    3.58
  -7  -3   0   41.41    2.71
   7   3   0   39.97    3.36
   7   3   0   37.27    3.18
  -8  -3   0    7.86    0.64
  -8  -3   0    7.99    1.06
   8   3   0    8.42    0.92
   8   3   0    8.34    0.95
  -9  -3   0    5.58    0.98
  -9  -3   0    5.57    0.52
   9   3   0    6.38    0.96
   9   3   0    7.16    0.81
 -10  -3   0    3.97    0.86
 -10  -3   0    4.92    0.45
  10   3   0    4.16    0.84
  10   3   0    4.73    0.70
 -11  -3   0    1.01    0.54
 -11  -3   0    0.69    0.20
  11   3   0    0.95    0.51
  11   3   0    0.53    0.35
 -12  -3   0    3.42    0.92
 -12  -3   0    2.41    0.34
  12   3   0    3.01    0.56
  12   3   0    2.34    0.75
 -13  -3   0    0.37    0.60
 -13  -3   0   -0.09    0.10
  13   3   0   -0.28    0.43
  13   3   0   -0.37    0.25
 -14  -3   0    3.75    1.19
  14   3   0    3.52    0.92
 -15  -3   0    0.22    0.69
  15   3   0   -0.55    0.52
 -16  -3   0    0.45    0.94
  16   3   0   -0.56    0.40
 -17  -3   0    3.17    1.05
  17   3   0    2.09    0.86
  16  -4   0    0.28    0.60
 -16   4   0    0.30    0.99
  15  -4   0    1.88    0.69
 -15   4   0    1.44    0.83
 -15   4   0    0.96    0.30
  14  -4   0    0.19    0.49
 -14   4   0    1.20    0.93
 -14   4   0    0.87    0.31
  13  -4   0    1.79    0.62
 -13   4   0    1.68    0.92
 -13   4   0    0.83    0.32
  12  -4   0    0.59    0.52
 -12   4   0    1.21    0.36
 -12   4   0    1.34    0.86
  11  -4   0    0.27    0.45
 -11   4   0    0.44    0.70
 -11   4   0    0.05    0.26
  10  -4   0    3.39    0.65
 -10   4   0    3.46    0.52
 -10   4   0    2.52    0.84
   9  -4   0    1.51    0.48
  -9   4   0    1.81    0.35
  -9   4   0    1.48    0.63
   8  -4   0    0.32    0.26
  -8   4   0    0.44    0.21
  -8   4   0    0.86    0.56
   7  -4   0   11.84    1.07
  -7   4   0   10.75    0.93
  -7   4   0   10.49    1.35
   6  -4   0   30.00    2.43
  -6   4   0   30.33    2.19
  -6   4   0   31.24    2.87
   5  -4   0    9.87    0.90
  -5   4   0    9.80    0.81
   4  -4   0    7.97    0.68
   4  -4   0    5.66    0.76
  -4   4   0    6.94    0.59
   3  -4   0    3.31    0.50
   3  -4   0    3.47    0.30
   3  -4   0    3.31    0.38
   3  -4   0    2.98    0.29
  -3   4   0    3.20    0.41
  -3   4   0    3.25    0.33
   2  -4   0   15.95    1.21
   2  -4   0   16.63    1.41
   2  -4   0   17.56    1.40
   2  -4   0   18.87    1.56
  -2   4   0   17.25    1.40
  -2   4   0   17.65    1.24
  -2   4   0   17.00    1.55
  -2   4   0   17.10    1.41
   1  -4   0   35.56    2.77
   1  -4   0   34.73    2.33
   1  -4   0   33.47    2.64
   1  -4   0   34.88    2.90
  -1   4   0   35.72    2.76
  -1   4   0   32.23    2.90
  -1   4   0   36.28    2.34
  -1   4   0   28.00    2.62
   0  -4   0    7.55    0.69
   0  -4   0    6.77    0.72
   0  -4   0    7.96    0.68
   0  -4   0    7.26    0.55
   0   4   0    7.51    0.56
   0   4   0    8.11    0.67
   0   4   0    6.22    0.70
   0   4   0    7.02    0.69
  -1  -4   0   50.35    3.40
  -1  -4   0   48.51    3.89
  -1  -4   0   51.51    4.24
   1   4   0   51.85    4.13
   1   4   0   51.84    4.24
   1   4   0   49.48    3.41
  -2  -4   0   24.37    1.98
  -2  -4   0   24.25    2.05
  -2  -4   0   21.85    2.01
  -2  -4   0   21.71    1.62
   2   4   0   23.33    1.62
   2   4   0   25.77    2.05
   2   4   0   25.84    1.98
   2   4   0   24.61    2.02
  -3  -4   0    1.36    0.16
  -3  -4   0    1.38    0.28
  -3  -4   0    1.32    0.26
  -3  -4   0    2.05    0.34
   3   4   0    1.41    0.16
   3   4   0    1.49    0.35
   3   4   0    1.57    0.29
   3   4   0    1.21    0.29
  -4  -4   0  107.61    9.13
  -4  -4   0  110.31    7.26
   4   4   0  104.22    9.14
   4   4   0  118.60    7.27
   4   4   0  104.29    8.17
   4   4   0  108.73    8.83
  -5  -4   0    4.68    0.56
  -5  -4   0    3.48    0.30
  -5  -4   0    3.71    0.30
   5   4   0    2.97    0.57
   5   4   0    4.27    0.58
  -6  -4   0    5.29    0.43
  -6  -4   0    4.68    0.43
  -6  -4   0    6.96    0.77
   6   4   0    7.27    0.73
   6   4   0    5.14    0.76
  -7  -4   0    0.38    0.32
  -7  -4   0    0.15    0.05
  -7  -4   0    0.09    0.09
   7   4   0    0.20    0.26
   7   4   0   -0.12    0.30
  -8  -4   0   -0.02    0.03
  -8  -4   0    0.03    0.11
  -8  -4   0   -0.23    0.26
   8   4   0    0.08    0.31
   8   4   0    0.04    0.24
  -9  -4   0    3.73    0.80
  -9  -4   0    5.14    0.44
   9   4   0    5.25    0.86
   9   4   0    4.70    0.74
 -10  -4   0    0.36    0.39
 -10  -4   0   -0.34    0.10
  10   4   0   -0.22    0.24
  10   4   0   -0.07    0.34
 -11  -4   0   15.04    1.21
 -11  -4   0   16.65    1.90
  11   4   0   18.92    1.64
  11   4   0   15.44    1.68
 -12  -4   0    0.42    0.53
 -12  -4   0    0.30    0.14
  12   4   0   -0.15    0.29
  12   4   0   -0.39    0.42
 -13  -4   0    0.17    0.61
 -13  -4   0    0.24    0.10
  13   4   0    0.39    0.60
  13   4   0    0.55    0.34
 -14  -4   0   -0.32    0.60
  14   4   0   -0.60    0.40
 -15  -4   0    1.16    0.91
  15   4   0    0.29    0.64
 -16  -4   0    1.96    1.07
  16   4   0    0.50    0.46
 -17  -4   0    0.75    0.88
  17   4   0   -0.33    0.56
  16  -5   0   -0.24    0.50
 -16   5   0    0.93    1.03
  15  -5   0    0.14    0.37
 -15   5   0    1.10    0.89
 -15   5   0    0.24    0.24
  14     0    0.18    0.47
 -14   5   0    0.57    0.83
 -14   5   0   -0.28    0.17
  13  -5   0    1.75    0.68
 -13   5   0    3.10    1.09
 -13   5   0    1.45    0.39
  12  -5   0    0.29    0.46
 -12   5   0    0.56    0.31
 -12   5   0    0.05    0.71
  11  -5   0    4.11    0.79
 -11   5   0    4.55    1.08
 -11   5   0    3.93    0.61
  10  -5   0    2.81    0.62
 -10   5   0    3.04    0.51
 -10   5   0    3.49    0.90
   9  -5   0   28.44    2.48
  -9   5   0   30.85    3.03
  -9   5   0   30.14    2.21
   8  -5   0   -0.02    0.20
  -8   5   0    0.00    0.17
  -8   5   0   -0.09    0.41
   7  -5   0    2.52    0.47
  -7   5   0    0.96    0.56
  -7   5   0    1.97    0.38
   6  -5   0    0.80    0.29
  -6   5   0    1.24    0.28
   5  -5   0    0.30    0.20
   5  -5   0    0.30    0.29
  -5   5   0    0.26    0.18
   4  -5   0    0.35    0.18
   4  -5   0    0.11    0.21
  -4   5   0    0.30    0.15
   3  -5   0   78.01    6.30
   3  -5   0   81.06    5.90
   3  -5   0   81.63    6.66
   3  -5   0   79.25    6.29
  -3   5   0   72.28    6.64
  -3   5   0   79.88    5.33
   2  -5   0   44.75    3.69
   2  -5   0   42.91    3.31
   2  -5   0   41.61    3.48
  -2   5   0   43.58    3.47
  -2   5   0   45.35    2.96
  -2   5   0   40.02    3.68
   1  -5   0    0.08    0.09
   1  -5   0    0.22    0.12
   1  -5   0    0.06    0.18
   1  -5   0    0.21    0.06
  -1   5   0    0.17    0.09
  -1   5   0    0.13    0.07
  -1   5   0    0.16    0.11
  -1   5   0    0.04    0.09
   0  -5   0    1.64    0.26
   0  -5   0    2.45    0.32
   0  -5   0    1.51    0.39
   0  -5   0    1.75    0.19
   0   5   0    1.64    0.27
   0   5   0    1.14    0.30
   0   5   0    2.25    0.29
   0   5   0    1.70    0.23
  -1  -5   0   18.27    1.58
  -1  -5   0   16.61    1.57
  -1  -5   0   18.28    1.26
   1   5   0   17.40    1.27
   1   5   0   19.48    1.56
   1   5   0   17.81    1.58
  -2  -5   0   72.69    5.13
  -2  -5   0   73.07    5.86
  -2  -5   0   74.37    6.25
  -2  -5   0   77.78    6.43
   2   5   0   79.86    6.25
   2   5   0   82.99    6.41
   2   5   0   78.94    5.88
   2   5   0   75.62    5.14
  -3  -5   0   20.60    1.51
  -3  -5   0   23.11    1.94
  -3  -5   0   20.53    1.91
  -3  -5   0   19.12    1.77
  -3  -5   0   24.79    1.96
   3   5   0   21.45    1.52
   3   5   0   22.51    1.92
   3   5   0   25.20    1.96
  -4  -5   0    9.54    0.69
  -4  -5   0   10.36    0.96
   4   5   0    9.63    0.70
   4   5   0    7.95    0.93
   4   5   0    9.63    0.95
   4   5   0   10.15    0.97
  -5  -5   0    8.56    0.95
  -5  -5   0    9.20    0.68
   5   5   0    9.20    0.95
   5   5   0    8.75    0.96
   5   5   0    9.99    0.69
  -6  -5   0    2.76    0.24
  -6  -5   0    1.80    0.44
  -6  -5   0    2.33    0.22
   6   5   0    2.24    0.52
   6   5   0    2.08    0.47
  -7  -5   0    2.81    0.60
  -7  -5   0    3.16    0.30
  -7  -5   0    3.33    0.28
   7   5   0    2.73    0.54
   7   5   0    3.23    0.66
  -8  -5   0   24.62    2.16
  -8  -5   0   19.22    1.46
  -8  -5   0   20.96    1.47
   8   5   0   18.10    1.88
   8   5   0   23.65    1.98
  -9  -5   0    0.30    0.36
  -9  -5   0    0.03    0.09
   9   5   0   -0.16    0.30
   9   5   0   -0.40    0.21
 -10  -5   0    0.70    0.44
 -10  -5   0    0.30    0.14
  10   5   0    0.47    0.39
  10   5   0    0.87    0.39
 -11  -5   0    6.29    1.08
 -11  -5   0    4.87    0.48
  11   5   0    4.60    0.93
  11   5   0    6.39    0.89
 -12  -5   0    0.71    0.58
 -12  -5   0    0.16    0.15
  12   5   0    0.29    0.52
  12   5   0    0.83    0.42
 -13  -5   0    0.14    0.11
 -13  -5   0   -0.15    0.49
  13   5   0   -0.01    0.36
  13   5   0    0.08    0.52
 -14  -5   0    0.42    0.64
  14   5   0   -0.56    0.22
  14   5   0   -0.05    0.48
 -15  -5   0    3.96    1.14
  15   5   0    2.32    0.92
 -16  -5   0    2.71    1.16
  16   5   0    3.13    0.91
 -17  -5   0    1.51    1.03
  17   5   0   -0.20    0.60
  15  -6   0    1.94    0.71
 -15   6   0    1.67    0.40
 -15   6   0    0.88    0.83
  14  -6   0    0.59    0.53
 -14   6   0   -0.49    0.68
 -14   6   0    0.24    0.24
  13  -6   0   -0.01    0.54
 -13   6   0    0.37    0.78
 -13   6   0   -0.53    0.18
  12  -6   0    2.95    0.76
 -12   6   0    3.60    0.59
 -12   6   0    4.42    1.19
  11  -6   0    1.02    0.48
 -11   6   0    1.16    0.85
 -11   6   0    0.69    0.33
  10  -6   0    0.62    0.44
 -10   6   0    3.08    0.91
 -10   6   0    1.62    0.40
   9  -6   0    1.51    0.43
  -9   6   0    1.64    0.39
  -9   6   0    1.81    0.69
   8  -6   0    2.72    0.54
  -8   6   0    2.41    0.43
  -8   6   0    2.00    0.71
   7  -6   0    2.89    0.53
  -7   6   0    3.00    0.47
  -7   6   0    4.26    0.85
   6  -6   0    1.86    0.40
  -6   6   0    1.32    0.32
   5  -6   0   44.37    3.85
   5  -6   0   43.72    3.36
  -5   6   0   41.57    3.04
   4  -6   0    3.35    0.58
   4  -6   0    5.41    0.48
   4  -6   0    6.45    0.73
  -4   6   0    4.47    0.50
   3  -6   0    2.68    0.40
   3  -6   0    1.19    0.31
   3  -6   0    1.27    0.21
  -3   6   0    2.08    0.31
   2  -6   0   39.73    3.38
   2  -6   0   45.08    3.75
   2  -6   0   43.65    3.56
  -2   6   0   45.95    3.54
  -2   6   0   45.72    3.03
  -2   6   0   40.96    3.75
   1  -6   0    0.11    0.17
   1  -6   0    0.15    0.11
   1  -6   0    0.20    0.10
  -1   6   0    0.28    0.13
  -1   6   0    0.22    0.12
  -1   6   0    0.20    0.09
   0  -6   0   48.13    3.98
   0  -6   0   46.67    3.72
   0  -6   0   46.84    3.87
   0  -6   0   46.28    3.20
   0   6   0   42.70    3.98
   0   6   0   49.69    3.86
   0   6   0   50.24    3.23
  -1  -6   0    1.00    0.23
  -1  -6   0    0.52    0.30
  -1  -6   0    0.94    0.15
  -1  -6   0    1.07    0.23
   1   6   0    1.29    0.20
   1   6   0    1.05    0.24
   1   6   0    1.49    0.28
   1   6   0    0.83    0.22
  -2  -6   0    6.07    0.87
  -2  -6   0    7.01    0.71
  -2  -6   0    6.58    0.52
   2   6   0    6.71    0.66
   2   6   0    7.31    0.55
   2   6   0    6.77    0.70
  -3  -6   0    5.83    0.49
  -3  -6   0    6.49    0.68
  -3  -6   0    7.47    0.83
   3   6   0    6.36    0.51
   3   6   0    6.89    0.66
   3   6   0    6.73    0.70
  -4  -6   0   22.60    1.66
  -4  -6   0   23.33    2.12
  -4  -6   0   25.09    2.15
   4   6   0   22.89    1.67
   4   6   0   26.99    2.17
   4   6   0   24.59    2.12
  -5  -6   0   14.85    1.41
  -5  -6   0   14.50    1.04
   5   6   0   15.09    1.05
   5   6   0   15.10    1.40
   5   6   0   13.10    1.37
  -6  -6   0    1.80    0.19
  -6  -6   0    1.61    0.42
   6   6   0    1.48    0.42
   6   6   0    1.77    0.51
   6   6   0    2.40    0.24
  -7  -6   0    3.57    0.31
  -7  -6   0    3.87    0.33
  -7  -6   0    2.84    0.61
   7   6   0    3.41    0.64
   7   6   0    3.53    0.73
  -8  -6   0   10.43    1.14
  -8  -6   0    8.23    0.69
  -8  -6   0    9.13    0.68
   8   6   0    8.25    1.22
   8   6   0   10.86    1.09
  -9  -6   0    0.63    0.16
  -9  -6   0    0.98    0.44
   9   6   0    1.40    0.51
   9   6   0    1.13    0.40
 -10  -6   0    4.76    0.44
 -10  -6   0    4.54    0.91
  10   6   0    4.54    0.94
  10   6   0    5.24    0.82
 -11  -6   0    2.61    0.76
 -11  -6   0    3.23    0.34
  11   6   0    2.61    0.68
  11   6   0    3.47    0.71
 -12  -6   0   20.25    2.10
 -12  -6   0   16.44    1.29
  12   6   0   20.17    1.82
  12   6   0   16.33    1.88
 -13  -6   0    5.81    1.19
  13   6   0    5.12    0.88
  13   6   0    3.67    0.93
 -14  -6   0    0.24    0.61
  14   6   0    0.50    0.61
  14   6   0    0.94    0.46
 -15  -6   0   -0.01    0.67
  15   6   0    0.71    0.68
 -16  -6   0    3.58    1.22
  16   6   0    2.62    0.88
 -17  -6   0    1.14    0.93
  17   6   0    0.10    0.57
  15  -7   0   -0.39    0.40
 -15   7   0    1.89    1.04
 -15   7   0   -0.06    0.27
  14  -7   0    0.14    0.45
 -14   7   0   -0.37    0.84
 -14   7   0    0.58    0.27
  13  -7   0   -0.34    0.39
 -13   7   0    0.15    0.79
 -13   7   0    0.67    0.29
  12  -7   0   -0.16    0.39
 -12   7   0    0.27    0.25
 -12   7   0    0.46    0.84
  11  -7   0    0.44    0.42
 -11   7   0    0.21    0.26
 -11   7   0    1.01    0.80
  10  -7   0    1.59    0.52
 -10   7   0    2.22    0.44
   9  -7   0    5.52    0.80
  -9   7   0    5.43    0.69
  -9   7   0    3.03    0.96
   8  -7   0   18.39    1.64
  -8   7   0   17.62    2.05
  -8   7   0   18.74    1.49
   7  -7   0    0.15    0.23
  -7   7   0    0.31    0.20
  -7   7   0   -0.13    0.41
   6  -7   0    1.10    0.34
  -6   7   0    0.52    0.24
   5  -7   0   -0.01    0.19
   5  -7   0    0.41    0.33
  -5   7   0    0.19    0.19
   4  -7   0    6.73    0.79
   4  -7   0    6.91    0.67
   4  -7   0    7.52    0.71
   4  -7   0    9.03    0.95
  -4   7   0    9.08    0.74
   3  -7   0    6.05    0.65
   3  -7   0    8.14    0.80
   3  -7   0    6.84    0.80
  -3   7   0    7.36    0.64
  -3   7   0    7.28    0.65
   2  -7   0    1.37    0.31
   2  -7   0    1.10    0.24
   2  -7   0    1.76    0.40
  -2   7   0    1.59    0.28
  -2   7   0    1.40    0.23
  -2   7   0    1.12    0.26
   1  -7   0    8.24    0.88
   1  -7   0    8.45    0.82
   1  -7   0    8.63    0.78
  -1   7   0    8.94    0.77
  -1   7   0    6.66    0.80
  -1   7   0    8.24    0.69
   0  -7   0   21.31    1.90
   0  -7   0   23.70    1.95
   0  -7   0   20.38    1.92
   0   7   0   24.04    1.89
   0   7   0   22.64    1.60
   0   7   0   20.24    1.94
  -1  -7   0   18.29    1.42
  -1  -7   0   21.75    1.80
  -1  -7   0   18.96    1.80
   1   7   0   20.25    1.80
   1   7   0   23.10    1.78
   1   7   0   19.53    1.45
  -2  -7   0   33.02    2.36
  -2  -7   0   34.06    2.87
  -2  -7   0   34.77    2.98
   2   7   0   33.45    2.38
   2   7   0   35.54    2.95
   2   7   0   36.57    2.92
  -3  -7   0    1.28    0.31
  -3  -7   0    0.80    0.36
  -3  -7   0    0.91    0.15
   3   7   0    1.00    0.23
   3   7   0    1.16    0.29
   3   7   0    0.90    0.17
  -4  -7   0   32.33    2.39
  -4  -7   0   34.12    2.96
  -4  -7   0   36.98    3.07
   4   7   0   34.66    3.00
   4   7   0   34.31    2.40
   4   7   0   38.68    3.07
  -5  -7   0   37.06    3.35
  -5  -7   0   40.87    3.28
  -5  -7   0   38.06    2.61
   5   7   0   38.05    2.62
   5   7   0   38.97    3.30
  -6  -7   0   13.52    1.00
  -6  -7   0   15.04    1.42
   6   7   0   13.21    1.43
   6   7   0   14.87    1.42
   6   7   0   13.82    1.02
  -7  -7   0    1.62    0.48
  -7  -7   0    2.61    0.23
   7   7   0    2.23    0.52
   7   7   0    1.99    0.60
  -8  -7   0    9.63    0.73
  -8  -7   0    9.48    1.18
  -8  -7   0   10.11    0.74
   8   7   0   11.26    1.15
   8   7   0    7.83    1.23
  -9  -7   0   11.97    0.99
  -9  -7   0   16.87    1.62
  -9  -7   0   13.19    0.98
   9   7   0   13.44    1.48
   9   7   0   17.75    1.51
 -10  -7   0    3.49    0.36
 -10  -7   0    4.13    0.86
  10   7   0    4.80    0.95
  10   7   0    4.63    0.78
 -11  -7   0   13.21    1.03
 -11  -7   0   16.06    1.72
  11   7   0   16.06    1.56
  11   7   0   12.64    1.56
 -12  -7   0    0.68    0.16
 -12  -7   0    1.01    0.90
  12   7   0    0.83    0.54
  12   7   0    0.40    0.46
 -13  -7   0    2.43    0.82
  13   7   0    1.26    0.50
  13   7   0    0.80    0.53
 -14  -7   0    0.40    0.55
  14   7   0   -0.17    0.39
  14   7   0    0.09    0.51
 -15  -7   0    0.22    0.79
  15   7   0   -0.38    0.56
  15   7   0    0.21    0.27
 -16  -7   0    7.48    1.58
  16   7   0    6.78    1.34
 -17  -7   0    1.00    1.00
  17   7   0    1.02    0.73
  15  -8   0    0.23    0.59
 -15   8   0    0.69    0.33
 -15   8   0    0.40    0.95
  14  -8   0    0.73    0.46
 -14   8   0    0.52    0.26
 -14   8   0    0.30    0.91
  13  -8   0    1.44    0.62
 -13   8   0    1.71    0.40
 -13   8   0    3.34    1.16
  12  -8   0    0.85    0.53
 -12   8   0    0.62    0.34
 -12   8   0    0.28    0.82
  11  -8   0    5.93    0.95
 -11   8   0    6.08    1.37
 -11   8   0    5.23    0.77
  10  -8   0   -0.04    0.30
 -10   8   0   -0.47    0.21
 -10   8   0    1.17    0.67
   9  -8   0    0.05    0.29
  -9   8   0   -0.26    0.22
  -9   8   0    0.24    0.65
   8  -8   0    0.12    0.25
  -8   8   0   -0.43    0.45
  -8   8   0    0.07    0.20
   7  -8   0    2.81    0.52
  -7   8   0    2.10    0.42
  -7   8   0    1.86    0.66
   6  -8   0    3.67    0.60
  -6   8   0    3.84    0.56
   5  -8   0    8.43    0.96
   5  -8   0    7.30    0.80
   5  -8   0    7.54    0.67
   5  -8   0    6.54    0.68
  -5   8   0    7.14    0.73
   4  -8   0    2.33    0.46
   4  -8   0    0.71    0.36
   4  -8   0    2.38    0.28
  -4   8   0    1.71    0.35
   3  -8   0    5.08    0.66
   3  -8   0    6.48    0.82
   3  -8   0    7.52    0.82
  -3   8   0    7.93    0.68
  -3   8   0    7.48    0.64
   2  -8   0   53.45    4.50
   2  -8   0   54.14    4.31
   2  -8   0   59.74    4.72
  -2   8   0   56.02    3.82
  -2   8   0   49.66    4.71
  -2   8   0   56.98    4.47
   1  -8   0    6.84    0.90
   1  -8   0    6.36    0.66
   1  -8   0    5.71    0.61
  -1   8   0    5.15    0.64
  -1   8   0    6.89    0.60
  -1   8   0    6.57    0.62
   0  -8   0    8.92    0.98
   0  -8   0    8.22    0.81
   0   8   0    7.38    0.81
   0   8   0    8.95    0.81
   0   8   0    8.61    0.71
  -1  -8   0   26.28    2.19
  -1  -8   0   22.89    2.18
   1   8   0   27.36    2.16
   1   8   0   22.19    2.17
   1   8   0   25.52    1.79
  -2  -8   0   52.46    4.38
  -2  -8   0   46.78    3.49
   2   8   0   52.21    4.35
   2   8   0   55.68    4.29
   2   8   0   50.88    3.51
  -3  -8   0    0.14    0.04
  -3  -8   0   -0.33    0.18
  -3  -8   0    0.06    0.18
   3   8   0    0.17    0.12
   3   8   0    0.07    0.16
   3   8   0    0.16    0.11
  -4  -8   0   41.78    3.41
  -4  -8   0   35.00    2.65
  -4  -8   0   37.86    3.30
   4   8   0   37.91    2.67
   4   8   0   42.22    3.38
   4   8   0   39.93    3.34
  -5  -8   0    4.98    0.69
  -5  -8   0    4.23    0.86
  -5  -8   0    3.87    0.34
   5   8   0    4.38    0.68
   5   8   0    3.78    0.37
  -6  -8   0    0.92    0.50
  -6  -8   0    1.06    0.37
  -6  -8   0    0.86    0.14
   6   8   0    1.26    0.39
   6   8   0    0.97    0.18
  -7  -8   0    7.05    0.55
  -7  -8   0    6.90    0.91
   7   8   0    7.17    1.11
   7   8   0    7.19    0.59
   7   8   0    8.00    0.94
  -8  -8   0    3.81    0.76
  -8  -8   0    4.66    0.37
   8   8   0    4.01    0.87
   8   8   0    4.94    0.80
  -9  -8   0   25.43    1.86
  -9  -8   0   27.74    1.86
  -9  -8   0   26.82    2.59
   9   8   0   31.38    2.52
   9   8   0   22.15    2.41
 -10  -8   0    5.29    0.99
 -10  -8   0    5.46    0.47
  10   8   0    5.45    1.00
  10   8   0    6.20    0.97
 -11  -8   0    1.07    0.16
 -11  -8   0    0.38    0.44
  11   8   0    0.58    0.54
  11   8   0    0.65    0.45
 -12  -8   0    0.39    0.48
  12   8   0    0.33    0.48
  12   8   0   -0.41    0.32
 -13  -8   0    4.95    1.03
  13   8   0    5.00    0.87
  13   8   0    3.10    0.85
 -14  -8   0    4.55    1.12
  14   8   0    5.36    1.20
  14   8   0    4.64    0.87
 -15  -8   0    6.57    1.40
  15   8   0    5.14    1.22
  15   8   0    5.56    0.94
 -16  -8   0    0.96    0.86
  16   8   0   -0.43    0.50
 -17  -8   0    0.98    0.91
  17   8   0    0.36    0.67
  14  -9   0    0.46    0.47
 -14   9   0    0.12    0.91
 -14   9   0    0.84    0.35
  13  -9   0   -0.23    0.42
 -13   9   0    1.06    0.95
 -13   9   0   -0.52    0.22
  12  -9   0    1.96    0.64
 -12   9   0    1.63    1.01
 -12   9   0    2.15    0.55
  11  -9   0    0.27    0.39
 -11   9   0    0.08    0.33
 -11   9   0    0.65    0.76
  10  -9   0    1.12    0.46
 -10   9   0    0.82    0.39
 -10   9   0    2.04    0.81
   9  -9   0    5.56    0.89
  -9   9   0    6.38    1.24
  -9   9   0    7.13    0.95
   8  -9   0    0.74    0.33
  -8   9   0   -0.06    0.52
  -8   9   0    0.38    0.30
   7  -9   0    6.18    0.78
  -7   9   0    2.01    0.74
  -7   9   0    3.24    0.55
   6  -9   0    5.96    0.78
  -6   9   0    3.97    0.62
   5  -9   0   15.01    1.49
   5  -9   0   17.05    1.76
   5  -9   0   19.36    1.49
   5  -9   0   18.88    1.59
  -5   9   0   17.22    1.41
   4  -9   0   12.35    1.15
   4  -9   0   11.07    1.21
   4  9   0    9.89    1.01
  -4   9   0   12.77    1.02
   3  -9   0    0.16    0.26
   3  -9   0    0.03    0.13
   3  -9   0    0.24    0.30
  -3   9   0   -0.02    0.10
  -3   9   0   -0.01    0.19
   2  -9   0    0.06    0.27
   2  -9   0    0.07    0.20
  -2   9   0    0.05    0.13
  -2   9   0   -0.15    0.08
  -2   9   0    0.21    0.22
   1  -9   0    9.66    1.13
   1  -9   0   11.15    1.05
  -1   9   0    9.26    1.03
  -1   9   0   11.50    0.91
  -1   9   0   10.64    0.98
   0  -9   0    1.94    0.35
   0  -9   0    2.02    0.54
   0   9   0    1.76    0.35
   0   9   0    2.31    0.35
   0   9   0    2.25    0.38
  -1  -9   0    5.86    0.61
  -1  -9   0    6.01    0.98
   1   9   0    4.89    0.61
   1   9   0    5.71    0.54
   1   9   0    5.70    0.64
  -2  -9   0   43.55    3.74
  -2  -9   0   40.64    3.60
   2   9   0   45.84    3.67
   2   9   0   42.14    3.70
   2   9   0   44.10    3.01
  -3  -9   0    2.04    0.59
  -3  -9   0    1.97    0.40
   3   9   0    2.09    0.44
   3   9   0    2.23    0.35
   3   9   0    1.78    0.28
  -4  -9   0    0.88    0.10
  -4  -9   0    1.03    0.35
  -4  -9   0    0.75    0.45
   4   9   0    0.81    0.20
   4   9   0    1.02    0.34
   4   9   0    0.94    0.29
  -5  -9   0    8.68    0.67
  -5  -9   0    9.29    1.36
  -5  -9   0    8.91    1.00
   5   9   0    9.41    0.72
   5   9   0    8.82    1.02
  -6  -9   0    8.81    0.69
  -6  -9   0   11.50    1.52
  -6  -9   0    9.56    1.05
   6   9   0    9.26    0.73
   6   9   0    9.50    1.06
  -7  -9   0   -0.04    0.03
  -7  -9   0    0.09    0.27
  -7  -9   0    0.05    0.38
   7   9   0   -0.22    0.22
   7   9   0    0.04    0.10
  -8  -9   0   13.92    1.57
  -8  -9   0   14.68    1.07
   8   9   0   15.60    1.11
   8   9   0   15.63    1.57
  -9  -9   0    7.44    0.54
  -9  -9   0    5.66    1.03
  -9  -9   0    7.79    0.59
   9   9   0    6.51    1.03
   9   9   0    6.97    1.17
 -10  -9   0   -0.04    0.31
 -10  -9   0    0.07    0.07
  10   9   0    0.31    0.44
  10   9   0   -0.05    0.35
 -11  -9   0    1.68    0.60
 -11  -9   0    1.49    0.20
  11   9   0    3.39    0.70
  11   9   0    1.71    0.73
 -12  -9   0    4.02    0.93
  12   9   0    3.77    0.94
  12   9   0    3.04    0.75
 -13  -9   0    2.05    0.76
  13   9   0    0.14    0.54
  13   9   0    1.57    0.59
 -14  -9   0    2.18    0.81
  14   9   0    1.88    0.63
  14   9   0    0.96    0.70
 -15  -9   0    2.53    0.95
  15   9   0    1.84    0.80
  15   9   0    1.83    0.64
 -16  -9   0    0.35    0.75
  16   9   0    0.49    0.56
 -17  -9   0    1.17    0.99
  17   9   0   -0.22    0.62
  14 -10   0    0.12    0.50
 -14  10   0    0.94    0.38
 -14  10   0    0.67    0.90
  13 -10   0   -0.14    0.37
 -13  10   0    0.32    0.89
 -13  10   0    0.13    0.27
  12 -10   0    4.29    0.87
 -12  10   0    5.81    1.43
 -12  10   0    5.10    0.80
  11 -10   0    1.15    0.54
 -11  10   0    1.26    0.45
 -11  10   0    1.33    0.92
  10 -10   0    0.33    0.39
 -10  10   0    1.91    0.75
 -10  10   0    0.26    0.30
   9 -10   0   -0.40    0.24
  -9  10   0   -0.19    0.59
  -9  10   0   -0.12    0.22
   8 -10   0    0.00    0.30
  -8  10   0    0.70    0.67
  -8  10   0   -0.29    0.24
   7 -10   0    4.46    0.68
  -7  10   0    1.95    0.76
  -7  10   0    3.68    0.61
   6 -10   0    1.78    0.45
  -6  10   0    0.66    0.31
   5 -10   0   29.53    2.31
   5 -10   0   31.51    2.39
   5 -10   0   23.33    2.32
   5 -10   0   28.65    2.62
  -5  10   0   27.53    2.12
   4 -10   0    1.21    0.41
   4 -10   0    0.92    0.19
   4 -10   0    1.09    0.38
  -4  10   0    0.47    0.26
   3 -10   0    0.62    0.31
   3 -10   0    0.32    0.34
  -3  10   0    0.31    0.15
  -3  10   0    0.52    0.25
   2 -10   0    9.26    1.01
   2 -10   0    6.67    0.84
  -2  10   0    8.51    0.78
  -2  10   0    7.28    0.75
   1 -10   0   17.23    1.66
   1 -10   0   17.46    1.56
  -1  10   0   17.57    1.49
  -1  10   0   13.69    1.53
  -1  10   0   17.52    1.33
   0 -10   0    7.77    1.10
   0 -10   0    7.57    0.77
   0  10   0    7.00    0.77
   0  10   0    7.02    0.77
   0  10   0    6.55    0.68
  -1 -10   0    2.07    0.38
  -1 -10   0    2.18    0.65
   1  10   0    1.91    0.37
   1  10   0    1.88    0.39
   1  10   0    2.06    0.35
  -2 -10   0    2.43    0.41
  -2 -10   0    1.95    0.60
   2  10   0    1.48    0.32
   2  10   0    2.31    0.35
   2  10   0    2.29    0.45
  -3 -10   0    0.12    0.38
  -3 -10   0   -0.05    0.21
   3  10   0    0.08    0.22
   3  10   0    0.09    0.15
   3  10   0   -0.03    0.14
  -4 -10   0    0.41    0.30
  -4 -10   0    0.02    0.35
   4  10   0    0.21    0.24
   4  10   0    0.22    0.19
   4  10   0    0.22    0.14
  -5 -10   0    2.49    0.55
  -5 -10   0    2.37    0.76
   5  10   0    3.62    0.40
   5  10   0    3.08    0.61
  -6 -10   0   39.96    3.44
  -6 -10   0   34.48    2.62
  -6 -10   0   38.21    3.43
   6  10   0   39.96    2.66
   6  10   0   40.65    3.39
  -7 -10   0    9.46    1.10
  -7 -10   0    8.77    0.68
  -7 -10   0    9.37    1.44
   7  10   0   10.00    0.75
   7  10   0    9.23    1.11
  -8 -10   0    4.03    0.95
  -8 -10   0    4.68    0.36
  -8 -10   0    4.70    0.82
   8  10   0    4.61    0.44
   8  10   0    3.66    0.75
  -9 -10   0   13.13    1.56
   9  10   0   15.37    1.55
 -10 -10   0    0.25    0.12
 -10 -10   0    0.57    0.44
  10  10   0    0.63    0.42
  10  10   0   -0.06    0.48
 -11 -10   0    0.24    0.07
 -11 -10   0   -0.01    0.42
  11  10   0   -0.11    0.41
  11  10   0    0.47    0.53
 -12 -10   0    0.09    0.47
  12  10   0    0.09    0.42
  12  10   0    0.04    0.47
 -13 -10   0    2.04    0.82
  13  10   0    2.67    0.92
  13  10   0    3.15    0.80
 -14 -10   0    1.30    0.76
  14  10   0    0.27    0.45
  14  10   0   -0.12    0.57
 -15 -10   0    0.53    0.63
  15  10   0   -0.02    0.56
  15  10   0    0.54    0.52
 -16 -10   0    2.90    1.20
  16  10   0    3.38    0.65
 -17 -10   0    4.07    1.27
  17  10   0    2.69    1.01
  14 -11   0    1.39    0.63
 -14  11   0    0.81    1.03
 -14  11   0    2.53    0.54
  13 -11   0    0.70    0.42
 -13  11   0   -0.46    0.30
 -13  11   0    1.28    1.00
  12 -11   0   -0.14    0.37
 -12  11   0    0.32    0.33
 -12  11   0    1.06    0.84
  11 -11   0   -0.16    0.42
 -11  11   0    0.88    0.38
 -11  11   0    0.76    0.86
  10 -11   0    0.91    0.43
 -10  11   0   -0.10    0.26
 -10  11   0    2.18    0.71
   9 -11   0    0.73    0.42
  -9  11   0    0.91    0.40
  -9  11   0    0.46    0.76
   8 -11   0    9.04    1.00
  -8  11   0    7.44    1.36
  -8  11   0    7.26    0.98
   7 -11   0    4.43    0.70
  -7  11   0    2.01    0.81
  -7  11   0    3.26    0.63
   6 -11   0    0.58    0.36
  -6  11   0    0.26    0.31
   5 -11   0    2.24    0.58
   5 -11   0    4.10    0.71
   5 -11   0    2.12    0.29
  -5  11   0    3.71    0.57
   4 -11   0   10.36    1.18
   4 -11   0   12.73    1.28
  -4  11   0   10.89    1.03
   3 -11   0    3.38    0.60
   3 -11   0    3.44    0.70
  -3  11   0    2.60    0.47
  -3  11   0    2.91    0.43
   2 -11   0    5.25    0.72
   2 -11   0    6.71    0.99
  -2  11   0    6.52    0.69
  -2  11   0    5.74    0.63
   1 -11   0   28.63    2.42
   1 -11   0   28.76    2.49
  -1  11   0   28.64    2.33
  -1  11   0   21.86    2.40
  -1  11   0   29.05    2.05
   0 -11   0    8.03    1.17
   0 -11   0    7.72    0.78
   0  11   0    6.16    0.76
   0  11   0    6.90    0.77
   0  11   0    7.21    0.72
  -1 -11   0   23.92    2.35
  -1 -11   0   25.65    2.23
   1  11   0   22.46    2.22
   1  11   0   24.60    1.86
   1  11   0   27.74    2.23
  -2 -11   0    4.04    0.51
  -2 -11   0    3.10    0.80
   2  11   0    3.46    0.47
   2  11   0    2.70    0.47
   2  11   0    4.45    0.66
  -3 -11   0   38.86    3.70
  -3 -11   0   41.02    3.77
   3  11   0   44.13    3.73
   3  11   0   47.54    3.75
   3  11   0   44.45    3.05
  -4 -11   0   23.36    2.43
  -4 -11   0   25.68    2.37
   4  11   0   26.48    2.29
   4  11   0   25.58    2.33
   4  11   0   25.47    1.85
  -5 -11   0    6.30    0.86
  -5 -11   0    5.14    1.06
   5  11   0    5.97   0.86
   5  11   0    4.97    0.52
  -6 -11   0    1.30    0.60
  -6 -11   0    0.78    0.40
   6  11   0    1.09    0.23
   6  11   0    0.87    0.42
  -7 -11   0    0.22    0.32
  -7 -11   0    0.10    0.27
   7  11   0    0.10    0.13
   7  11   0    0.08    0.28
  -8 -11   0    1.88    0.72
  -8 -11   0    0.82    0.41
   8  11   0    1.11    0.45
   8  11   0    1.45    0.24
  -9 -11   0    3.84    0.94
  -9 -11   0    3.53    0.82
   9  11   0    5.21    0.90
   9  11   0    5.43    0.48
 -10 -11   0   20.94    2.16
 -10 -11   0   19.54    1.45
 -10 -11   0   21.88    2.28
  10  11   0   22.01    2.11
 -11 -11   0    0.60    0.47
  11  11   0    0.19    0.42
 -12 -11   0    0.26    0.49
  12  11   0    0.61    0.66
  12  11   0    0.27    0.49
 -13 -11   0    6.57    1.25
  13  11   0    6.72    1.11
  13  11   0    6.58    1.31
 -14 -11   0    1.57    0.72
  14  11   0    0.41    0.64
  14  11   0    0.34    0.58
 -15 -11   0    0.27    0.56
  15  11   0   -0.71    0.44
  15  11   0   -0.02    0.50
 -16 -11   0    0.77    0.79
  16  11   0   -0.01    0.48
  16  11   0    0.65    0.43
 -17 -11   0   -0.19    0.82
  17  11   0   -0.44    0.52
  13 -12   0   -0.31    0.31
 -13  12   0   -0.92    0.80
 -13  12   0    0.05    0.37
  12 -12   0   -0.21    0.31
 -12  12   0   -0.26    0.85
 -12  12   0   -0.27    0.32
  11 -12   0    0.63    0.46
 -11  12   0    0.65    0.92
 -11  12   0    0.07    0.34
  10 -12   0    4.93    0.93
 -10  12   0    6.17    1.31
 -10  12   0    4.56    0.82
   9 -12   0    0.56    0.42
  -9  12   0    0.30    0.35
  -9  12   0   -0.39    0.71
   8 -12   0    1.88    0.57
  -8  12   0    2.34    0.52
  -8  12   0    3.01    0.88
   7 -12   0   12.85    1.38
  -7  12   0   13.67    1.28
  -7  12   0   13.21    1.73
   6 -12   0    0.11    0.21
   6 -12   0    1.02    0.40
  -6  12   0    0.95    0.34
   5 -12   0    2.97    0.63
   5 -12   0    3.72    0.70
   5 -12   0    2.16    0.38
  -5  12   0    2.75    0.53
   4 -12   0    5.34    0.91
   4 -12   0    8.26    1.07
  -4  12   0    6.94    0.67
  -4  12   0    6.13    0.81
   3 -12   0    7.79    0.92
   3 -12   0    8.10    1.13
  -3  12   0    8.20    0.78
  -3  12   0    7.04    0.89
   2 -12   0   -0.03    0.35
   2 -12   0    0.86    0.33
  -2  12   0    0.71    0.25
  -2  12   0    0.61    0.31
   1 -12   0    0.16    0.33
   1 -12   0    0.68    0.24
  -1  12   0    0.36    0.23
  -1  12   0    0.61    0.30
  -1  12   0    0.21    0.12
   0 -12   0   15.83    1.60
   0 -12   0   14.98    1.36
   0  12   0   11.89    1.34
   0  12   0   15.78    1.23
   0  12   0   13.78    1.34
  -1 -12   0    0.62    0.24
  -1 -12   0    0.45    0.46
   1  12   0    0.31    0.25
   1  12   0    0.57    0.27
   1  12   0    0.39    0.23
  -2 -12   0   15.25    1.47
  -2 -12   0   12.63    1.64
   2  12   0   15.21    1.45
   2  12   0   17.44    1.52
   2  12   0   15.41    1.24
  -3 -12   0    5.75    0.70
  -3 -12   0    6.72    1.20
   3  12   0    5.66    0.59
   3  12   0    5.08    0.62
   3  12   0    6.12    0.86
  -4 -12   0    6.92    1.27
  -4 -12   0    6.27    0.82
   4  12   0    6.07    0.63
   4  12   0    7.46    0.76
   4  12   0    7.63    0.88
  -5 -12   0   30.26    3.15
  -5 -12   0   37.34    3.22
   5  12   0   35.70    2.50
   5  12   0   35.72    3.14
  -6 -12   0    7.84    1.01
  -6 -12   0    7.21    1.33
   6  12   0    8.16    0.69
   6  12   0    7.45    1.00
  -7 -12   0   26.38    2.57
  -7 -12   0   26.48    2.66
   7  12   0   28.61    2.54
   7  12   0   26.15    1.92
  -8 -12   0   19.73    2.02
  -8 -12   0   17.66    2.12
   8  12   0   22.02    2.04
   8  12   0   19.62    1.46
  -9 -12   0    0.36    0.41
  -9 -12   0    0.32    0.41
   9  12   0    0.09    0.34
   9  12   0    0.19    0.14
 -10 -12   0    0.18    0.40
 -10 -12   0    0.50    0.43
  10  12   0    0.39    0.45
 -11 -12   0    3.90    1.04
 -11 -12   0    5.55    1.02
  11  12   0    4.85    0.98
 -12 -12   0    0.20    0.57
 -12 -12   0   -0.21    0.34
  12  12   0    0.23    0.52
 -13 -12   0    4.72    1.13
  13  12   0    5.55    1.07
 -14 -12   0    0.08    0.67
  14  12   0    0.91    0.67
  14  12   0    0.60    0.57
 -15 -12   0    0.49    0.72
  15  12   0   -0.08    0.46
  15  12   0   -0.26    0.46
 -16 -12   0    3.45    1.14
  16  12   0    1.63    0.74
  16  12   0    2.91    0.74
 -17 -12   0    1.31    0.97
  17  12   0    1.04    0.68
  13 -13   0    0.03    0.37
 -13  13   0    0.20    0.85
 -13  13   0   -0.57    0.41
  12 -13   0    0.38    0.45
 -12  13   0    1.06    1.02
 -12  13   0    0.37    0.45
  11 -13   0    2.41    0.64
 -11  13   0    2.39    0.60
 -11  13   0    1.25    0.98
  10 -13   0    0.05    0.44
 -10  13   0    0.81    0.41
 -10  13   0    2.03    0.90
   9 -13   0    0.45    0.37
  -9  13   0   -0.26    0.66
  -9  13   0   -0.04    0.30
   8 -13   0    5.83    0.91
  -8  13   0    4.12    0.74
  -8  13   0    4.98    1.16
   7 -13   0    2.40    0.59
  -7  13   0    1.04    0.73
  -7  13   0    1.15    0.44
   6 -13   0    9.02    0.86
   6 -13   0    9.29    1.11
   5 -13   0    5.40    0.81
   5 -13   0    2.89    0.46
   5 -13   0    3.18    0.66
  -5  13   0    3.69    0.62
   4 -13   0    3.45    0.64
   4 -13   0    2.48    0.65
  -4  13   0    2.47    0.54
  -4  13   0    2.53    0.40
   3 -13   0   11.82    1.25
   3 -13   0    8.57    1.07
  -3  13   0   10.28    1.02
  -3  13   0   10.05    0.96
   2 -13   0    9.23    0.97
   2 -13   0    8.00    1.24
  -2  13   0    8.30    0.89
  -2  13   0    7.84    0.85
   1 -13   0    2.91    0.50
   1 -13   0    1.65    0.60
  -1  13   0    2.41    0.49
  -1  13   0    2.89    0.49
   0 -13   0    2.46    0.70
   0 -13   0    1.27    0.31
   0  13   0    1.28    0.38
   0  13   0    1.34    0.29
   0  13   0    1.54    0.38
  -1 -13   0    3.80    0.83
  -1 -13   0    3.74    0.54
   1  13   0    3.04    0.52
   1  13   0    3.66    0.61
   1  13   0    3.20    0.54
  -2 -13   0    7.82    1.36
  -2 -13   0    8.46    0.85
   2  13   0    7.56    0.75
   2  13   0    6.57    0.80
   2  13   0    7.88    0.89
  -3 -13   0    5.07    0.65
  -3 -13   0    3.20    0.91
   3  13   0    5.28    0.81
   3  13   0    5.85    0.66
   3  13   0    5.04    0.59
  -4 -13   0   24.97    2.44
  -4 -13   0   24.90    2.59
   4  13   0   27.28    2.39
   4  13   0   29.20    2.48
   4  13   0   27.04    1.98
  -5 -13   0    2.35    0.54
  -5 -13   0    1.88    0.70
   5  13   0    2.54    0.55
   5  13   0    2.25    0.37
  -6 -13   0    7.40    0.95
  -6 -13   0    5.92    1.18
   6  13   0    7.02    1.02
   6  13   0    6.31    0.63
  -7 -13   0    0.14    0.47
  -7 -13   0    0.10    0.38
   7  13   0    0.05    0.29
   7  13   0    0.01    0.13
  -8 -13   0    3.73    0.99
  -8 -13   0    4.65    0.86
   8  13   0    3.74    0.47
   8  13   0    4.73    0.86
  -9 -13   0    1.15    0.58
  -9 -13   0    1.19    0.50
   9  13   0    1.21    0.25
   9  13   0    1.20    0.50
 -10 -13   0    0.30    0.41
 -10 -13   0    0.83    0.50
  10  13   0    0.18    0.47
  10  13   0    0.35    0.15
 -11 -13   0    0.14    0.51
 -11 -13   0    0.36    0.54
  11  13   0    0.12    0.45
 -12 -13   0    1.42    0.70
 -12 -13   0    1.98    0.78
  12  13   0    2.29    0.76
 -13 -13   0    4.56    1.10
 -13 -13   0    3.46    1.08
  13  13   0    4.53    0.97
 -14 -13   0   -0.05    0.50
 -14 -13   0   -0.62    0.43
  14  13   0   -0.48    0.53
 -15 -13   0   -0.01    0.64
  15  13   0   -0.14    0.49
 -16 -13   0   -0.02    0.74
  16  13   0   -0.21    0.40
  12 -14   0    0.24    0.46
 -12  14   0   -0.55    0.90
 -12  14   0   -0.26    0.39
  11 -14   0    1.90    0.63
 -11  14   0    3.00    1.11
 -11  14   0    1.25    0.57
  10 -14   0    1.12    0.56
 -10  14   0    0.78    0.95
 -10  14   0    0.36    0.43
   9 -14   0    1.17    0.55
  -9  14   0    1.52    0.83
  -9  14   0    0.00    0.40
   8 -14   0    4.23    0.83
  -8  14   0    4.24    0.80
  -8  14   0    4.11    1.08
   7 -14   0    0.84    0.45
  -7  14   0    0.69    0.40
  -7  14   0    0.87    0.74
   6 -14   0    0.54    0.39
  -6  14   0    0.32    0.33
   5 -14   0    1.25    0.30
   5 -14   0    1.91    0.57
   5 -14   0    0.84    0.40
  -5  14   0    0.71    0.39
   4 -14   0    7.07    1.06
   4 -14   0    4.66    0.80
  -4  14   0    4.04    0.72
  -4  14   0    4.65    0.55
   3 -14   0    4.52    0.76
   3 -14   0    5.53    0.96
  -3  14   0    4.65    0.55
  -3  14   0    4.62    0.72
   2 -14   0    3.33    0.81
   2 -14   0    3.45    0.59
  -2  14   0    3.31    0.52
  -2  14   0    2.30    0.52
   1 -14   0   12.18    1.52
   1 -14   0   14.61    1.36
  -1  14   0   13.77    1.31
  -1  14   0   12.89    1.23
   0 -14   0   -0.03    0.13
   0 -14   0   -0.12    0.34
   0  14   0    0.09    0.26
   0  14   0   -0.04    0.15
  -1 -14   0    2.39    0.42
  -1 -14   0    2.32    0.71
   1  14   0    2.32    0.43
   1  14   0    2.75    0.53
   1  14   0    2.06    0.47
  -2 -14   0   -0.12    0.35
  -2 -14   0    0.43    0.21
   2  14   0    0.37    0.21
   2  14   0    0.77    0.31
   2  14   0    0.50    0.26
  -3 -14   0    5.14    1.14
  -3 -14   0    6.15    0.77
   3  14   0    6.93    0.84
   3  14   0    6.77    0.71
   3  14   0    5.87    0.73
  -4 -14   0    6.70    1.29
  -4 -14   0    6.40    0.76
   4  14   0    6.21    0.71
   4  14   0    6.55    0.96
   4  14   0    5.19    0.66
  -5 -14   0   -0.05    0.21
  -5 -14   0    0.22    0.37
   5  14   0    0.22    0.19
   5  14   0    0.18    0.27
  -6 -14   0   17.85    2.16
  -6 -14   0   21.45    2.06
   6  14   0   19.75    1.54
   6  14   0   21.02    2.00
  -7 -14   0    0.83    0.46
  -7 -14   0    1.21    0.65
   7  14   0    0.91    0.46
   7  14   0    1.13    0.26
  -8 -14   0    2.79    0.91
  -8 -14   0    3.16    0.76
   8  14   0    3.62    0.77
   8  14   0    3.45    0.45
  -9 -14   0    1.76    0.63
  -9 -14   0    0.50    0.52
   9  14   0    1.20    0.26
   9  14   0    1.16    0.56
 -10 -14   0    9.34    1.75
 -10 -14   0   11.49    1.48
  10  14   0   14.07    1.55
 -11 -14   0    0.34    0.50
 -11 -14   0    0.17    0.48
  11  14   0   -0.04    0.50
 -12 -14   0    0.48    0.60
 -12 -14   0   -0.27    0.50
  12  14   0   -0.45    0.44
 -13 -14   0    0.92    0.69
 -13 -14   0    0.78    0.62
  13  14   0    1.03    0.61
 -14 -14   0   -1.03    0.47
 -14 -14   0   -0.03    0.62
  14  14   0   -0.02    0.48
 -15 -14   0   -0.14    0.62
 -15 -14   0    0.32    0.67
  15  14   0    0.43    0.61
 -16 -14   0    2.49    0.97
 -16 -14   0    2.25    0.89
  16  14   0    3.63    0.88
  12 -15   0    1.44    0.54
 -12  15   0    1.52    0.60
 -12  15   0    0.03    1.04
  11 -15   0    1.08    0.54
 -11  15   0    1.07    0.54
 -11  15   0    1.21    1.02
  10 -15   0    2.67    0.72
 -10  15   0    2.79    1.10
 -10  15   0    2.37    0.67
   9 -15   0   -0.02    0.44
  -9  15   0    0.10    0.39
  -9  15   0    2.36    0.84
   8 -15   0   -0.22    0.38
  -8  15   0   -0.39    0.35
  -8  15   0    0.33    0.71
   7 -15   0    0.54    0.45
  -7  15   0   -0.04    0.59
  -7  15   0    0.69    0.46
   6 -15   0    2.18    0.65
  -6  15   0    0.49    0.67
  -6  15   0    1.58    0.50
   5 -15   0    0.63    0.45
   5 -15   0    0.23    0.20
  -5  15   0   -0.06    0.39
   4 -15   0    2.34    0.54
   4 -15   0    2.32    0.67
  -4  15   0    2.09    0.58
  -4  15   0    1.89    0.37
   3 -15   0    0.43    0.37
   3 -15   0    0.72    0.31
  -3  15   0    0.80    0.41
  -3  15   0    0.65    0.23
   2 -15   0    1.87    0.43
   2 -15   0    1.79    0.67
  -2  15   0    1.73    0.50
  -2  15   0    1.76    0.38
   1 -15   0    0.03    0.39
   1 -15   0   -0.13    0.15
  -1  15   0    0.00    0.11
  -1  15   0   -0.11    0.27
   0 -15   0    0.61    0.22
   0 -15   0    0.17    0.41
   0  15   0    0.99    0.37
   0  15   0    0.58    0.22
  -1 -15   0    1.24    0.57
  -1 -15   0    1.86    0.37
   1  15   0    2.06    0.45
   1  15   0    1.87    0.37
   1  15   0    1.78    0.44
  -2 -15   0   13.72    1.29
  -2 -15   0   12.27    1.83
   2  15   0   11.37    1.25
   2  15   0   14.22    1.20
   2  15   0   14.12    1.37
  -3 -15   0   25.52    2.62
  -3 -15   0   26.99    2.41
   3  15   0   27.81    2.03
   3  15   0   24.60    2.34
   3  15   0   27.77    2.48
  -4 -15   0    5.22    0.65
  -4 -15   0    4.28    1.04
   4  15   0    4.04    0.56
   4  15   0    5.41    0.84
   4  15   0    5.58    0.66
  -5 -15   0    0.52    0.45
  -5 -15   0    0.35    0.28
   5  15   0    0.25    0.29
   5  15   0    0.39    0.40
  -6 -15   0    0.01    0.30
  -6 -15   0    0.54    0.45
   6  15   0    0.06    0.18
   6  15   0   -0.34    0.19
  -7 -15   0   14.37    1.62
  -7 -15   0   12.88    2.07
   7  15   0   14.64    1.59
   7  15   0   14.29    1.16
  -8 -15   0    3.41    0.84
  -8 -15   0    2.30    0.84
   8  15   0    4.46    0.54
   8  15   0    4.41    0.87
  -9 -15   0    0.95    0.57
  -9 -15   0    0.82    0.58
   9  15   0    1.26    0.27
   9  15   0    1.66    0.61
 -10 -15   0    3.16    0.83
 -10 -15   0    4.53    1.17
  10  15   0    3.47    0.86
 -11 -15   0    0.09    0.58
 -11 -15   0    1.36    0.60
  11  15   0    0.46    0.51
 -12 -15   0    0.85    0.63
 -12 -15   0    0.26    0.45
  12  15   0    1.03    0.60
 -13 -15   0    1.74    0.84
 -13 -15   0    1.24    0.71
  13  15   0    2.14    0.75
 -14 -15   0   12.95    1.79
 -14 -15   0   10.65    2.07
  14  15   0   16.51    1.81
 -15 -15   0    1.83    0.88
 -15 -15   0    1.68    0.89
  15  15   0    2.09    0.76
 -16 -15   0    1.08    0.69
 -16 -15   0   -0.02    0.76
  16  15   0    0.32    0.50
  11 -16   0    0.39    0.51
 -11  16   0    0.28    0.44
 -11  16   0   -1.00    0.74
  10 -16   0    0.63    0.46
 -10  16   0    0.27    0.47
 -10  16   0   -0.48    0.74
   9 -16   0   -0.31    0.40
  -9  16   0   -0.11    0.43
  -9  16   0    0.66    0.77
   8 -16   0    1.47    0.67
  -8  16   0    0.87    0.40
  -8  16   0    0.05    0.78
   7 -16   0   -0.37    0.37
  -7  16   0   -0.34    0.64
  -7  16   0    0.63    0.43
   6 -16   0    3.13    0.79
  -6  16   0    2.06    0.58
  -6  16   0    1.52    0.80
   5 -16   0    0.39    0.49
  -5  16   0    0.27    0.45
   4 -16   0    0.02    0.23
   4 -16   0    0.61    0.41
  -4  16   0    0.21    0.43
  -4  16   0    0.38    0.15
   3 -16   0    0.29    0.22
   3 -16   0    0.57    0.51
  -3  16   0    0.19    0.38
  -3  16   0    0.17    0.15
   2 -16   0    0.57    0.51
   2 -16   0    0.90    0.26
  -2  16   0    0.31    0.40
  -2  16   0    0.55    0.22
   1 -16   0    6.88    1.33
   1 -16   0    9.45    0.94
  -1  16   0    7.46    1.02
  -1  16   0    8.65    0.94
   0 -16   0    3.26    0.44
   0 -16   0    4.05    0.95
   0  16   0    2.64    0.53
   0  16   0    3.82    0.67
  -1 -16   0   12.22    1.19
  -1 -16   0   10.67    1.71
   1  16   0   12.93    1.29
   1  16   0   12.35    1.17
  -2 -16   0    0.46    0.17
  -2 -16   0    0.88    0.54
   2  16   0    0.38    0.32
   2  16   0    0.37    0.26
  -3 -16   0   -0.06    0.14
  -3 -16   0    0.08    0.40
   3  16   0   -0.30    0.20
   3  16   0   -0.20    0.24
  -4 -16   0    0.33    0.41
  -4 -16   0    0.36    0.18
   4  16   0    0.41    0.37
   4  16   0    0.02    0.25
  -5 -16   0    2.06    0.73
  -5 -16   0    2.79    0.52
   5  16   0    2.30    0.62
   5  16   0    1.49    0.45
  -6 -16   0    0.24    0.31
  -6 -16   0    0.18    0.42
   6  16   0    0.40    0.32
   6  16   0    0.22    0.22
  -7 -16   0   24.75    2.69
  -7 -16   0   25.86    2.51
   7  16   0   24.29    2.44
   7  16   0   26.23    1.92
  -8 -16   0    0.90    0.57
  -8 -16   0    1.04    0.50
   8  16   0    0.82    0.27
   8  16   0    0.77    0.46
  -9 -16   0   -0.05    0.40
  -9 -16   0    0.35    0.47
   9  16   0   -0.07    0.37
   9  16   0   -0.03    0.12
 -10 -16   0    0.14    0.45
 -10 -16   0   -0.55    0.38
  10  16   0   -0.22    0.39
 -11 -16   0   11.32    2.10
 -11 -16   0   15.54    1.91
  11  16   0   19.09    1.93
 -12 -16   0    1.36    0.68
 -12 -16   0    2.28    0.80
  12  16   0    3.70    0.90
 -13 -16   0    0.42    0.68
 -13 -16   0    0.02    0.54
  13  16   0    1.84    0.72
 -14 -16   0   -0.91    0.49
 -14 -16   0    0.24    0.62
  14  16   0    1.48    0.69
 -15 -16   0    0.18    0.52
 -15 -16   0   -1.29    0.60
  15  16   0    0.16    0.46
  10 -17   0    0.11    0.45
 -10  17   0    0.62    0.46
   9 -17   0    0.26    0.48
  -9  17   0    0.36    0.50
   8 -17   0    0.12    0.38
  -8  17   0   -0.57    0.40
  -8  17   0    0.93    0.69
   7 -17   0    0.98    0.56
  -7  17   0    0.72    0.55
  -7  17   0    0.91    0.72
   6 -17   0    4.77    0.97
  -6  17   0    2.44    0.69
  -6  17   0    2.05    0.81
   5 -17   0    0.35    0.56
  -5  17   0    0.46    0.55
   4 -17   0    1.82    0.70
  -4  17   0    1.74    0.31
  -4  17   0    2.63    0.69
   3 -17   0    0.15    0.16
   3 -17   0    0.42    0.47
  -3  17   0    0.05    0.46
  -3  17   0    0.08    0.13
   2 -17   0    2.07    0.68
   2 -17   0    1.10    0.31
  -2  17   0    1.96    0.40
  -2  17   0    2.19    0.63
   1 -17   0    1.13    0.24
   1 -17   0    0.40    0.48
  -1  17   0    0.35    0.24
  -1  17   0    0.33    0.42
   0 -17   0    2.16    0.76
   0 -17   0    2.75    0.36
   0  17   0    2.88    0.55
   0  17   0    2.81    0.61
  -1 -17   0    0.41    0.13
  -1 -17   0    0.43    0.58
   1  17   0    0.42    0.27
   1  17   0    0.33    0.36
  -2 -17   0    1.66    0.30
  -2 -17   0    2.14    0.86
   2  17   0    2.10    0.51
   2  17   0    1.91    0.48
  -3 -17   0   10.61    1.05
  -3 -17   0    8.82    1.63
   3  17   0   11.14    1.10
   3  17   0   11.00    1.22
  -4 -17   0   13.82    1.32
  -4 -17   0   11.56    1.98
   4  17   0   13.41    1.22
   4  17   0   13.38    1.46
  -5 -17   0    4.43    1.15
  -5 -17   0    6.96    0.77
   5  17   0    6.31    0.80
   5  17   0    7.86    0.96
  -6 -17   0    7.57    0.86
  -6 -17   0    4.17    1.13
   6  17   0    6.94    0.75
   6  17   0    8.34    1.22
  -7 -17   0    1.01    0.39
  -7 -17   0    0.67    0.58
   7  17   0    0.70    0.42
   7  17   0    0.80    0.28
  -8 -17   0   20.51    2.53
  -8 -17   0   23.20    2.36
   8  17   0   23.78    1.78
   8  17   0   23.82    2.38
  -9 -17   0    3.65    1.06
  -9 -17   0    4.79    0.94
   9  17   0    4.92    1.01
 -10 -17   0    0.22    0.39
 -10 -17   0    0.01    0.39
  10  17   0    0.06    0.44
 -11 -17   0    0.36    0.48
 -11 -17   0    0.39    0.55
  11  17   0    1.25    0.58
 -12 -17   0    0.47    0.75
 -12 -17   0   -0.95    0.44
  12  17   0    0.32    0.54
 -13 -17   0    0.99    0.67
 -13 -17   0    1.34    0.71
  13  17   0    2.49    0.82
 -14 -17   0    0.18    0.55
  14  17   0    0.10    0.53
 -15 -17   0    2.36    0.94
 -15 -17   0    2.54    0.94
  15  17   0    4.70    1.01
  10 -18   0   -0.27    0.40
 -10  18   0   -0.69    0.35
   9 -18   0    0.52    0.49
  -9  18   0    1.33    0.61
   8 -18   0   -0.55    0.41
  -8  18   0   -0.22    0.45
   7 -18   0    1.87    0.67
  -7  18   0    1.32    0.63
   6 -18   0    0.13    0.49
  -6  18   0   -0.12    0.56
   5 -18   0    1.11    0.61
  -5  18   0    0.26    0.52
   4 -18   0    0.04    0.52
  -4  18   0    0.82    0.58
   3 -18   0    1.35    0.63
  -3  18   0    1.76    0.63
  -3  18   0    1.57    0.33
   2 -18   0    1.51    0.68
  -2  18   0    1.18    0.34
  -2  18   0    1.57    0.59
   1 -18   0    0.41    0.52
  -1  18   0    0.69    0.47
  -1  18   0    0.66    0.25
   0 -18   0    5.99    1.28
   0  18   0    7.85    0.89
   0  18   0    7.05    1.01
  -1 -18   0    0.76    0.59
   1  18   0    0.76    0.31
   1  18   0    0.58    0.41
  -2 -18   0    3.01    0.94
   2  18   0    3.09    0.62
   2  18   0    3.57    0.67
  -3 -18   0    2.38    0.97
   3  18   0    2.68    0.56
   3  18   0    3.06    0.66
  -4 -18   0    9.65    1.82
   4  18   0   14.16    1.47
   4  18   0   13.75    1.24
  -5 -18   0    0.96    0.53
   5  18   0    1.07    0.43
   5  18   0    0.83    0.35
  -6 -18   0    0.06    0.39
   6  18   0    0.01    0.27
   6  18   0    0.11    0.29
  -7 -18   0    0.41    0.51
   7  18   0    0.92    0.45
   7  18   0    0.62    0.30
  -8 -18   0    5.36    1.37
   8  18   0    6.16    1.13
   8  18   0    6.58    0.68
  -9 -18   0    0.14    0.43
   9  18   0    0.08    0.47
 -10 -18   0    6.22    1.50
  10  18   0    7.44    1.27
 -11 -18   0    0.34    0.52
  11  18   0   -0.09    0.47
 -12 -18   0    0.67    0.70
  12  18   0    1.42    0.67
 -13 -18   0    1.16    0.80
  13  18   0    0.63    0.58
 -14 -18   0    0.36    0.63
  14  18   0    0.24    0.47
 -15 -18   0    0.45    0.60
  15  18   0    1.61    0.63
   9 -19   0   -0.52    0.39
  -9  19   0    0.25    0.42
   8 -19   0    1.23    0.68
  -8  19   0    0.52    0.57
   7 -19   0   -0.07    0.40
  -7  19   0    0.08    0.49
   6 -19   0   -0.16    0.47
  -6  19   0   -0.25    0.49
   5 -19   0    0.25    0.51
  -5  19   0    0.72    0.59
   4 -19   0    0.11    0.50
  -4  19   0   -0.46    0.52
   3 -19   0   11.59    1.76
  -3  19   0    9.95    1.41
  -3  19   0   12.53    1.17
   2 -19   0   -0.26    0.43
  -2  19   0    0.02    0.13
  -2  19   0   -0.14    0.42
   1 -19   0    1.83    0.79
  -1  19   0    1.71    0.44
  -1  19   0    2.03    0.71
   0 -19   0    1.88    0.79
   0  19   0    1.20    0.55
   0  19   0    1.28    0.40
  -1 -19   0   11.03    1.88
   1  19   0   12.10    1.27
   1  19   0   12.61    1.32
  -2 -19   0    2.17    0.85
   2  19   0    1.94    0.56
   2  19   0    2.04    0.53
  -3 -19   0    1.10    0.63
   3  19   0    0.30    0.26
   3  19   0    0.50    0.38
  -4 -19   0    1.78    0.93
   4  19   0    2.12    0.57
   4  19   0    2.36    0.55
  -5 -19   0    1.10    0.68
   5  19   0    1.11    0.43
   5  19   0    0.70    0.37
  -6 -19   0    0.83    0.62
   6  19   0    0.67    0.39
   6  19   0    0.36    0.32
  -7 -19   0    9.34    1.83
   7  19   0   12.15    1.14
   7  19   0   14.13    1.51
  -8 -19   0    9.83    1.91
   8  19   0   14.41    1.55
   8  19   0   12.78    1.10
  -9 -19   0    2.65    0.95
   9  19   0    5.71    1.08
 -10 -19   0   -0.02    0.65
  10  19   0    0.14    0.50
 -11 -19   0    0.53    0.59
  11  19   0    0.58    0.56
 -12 -19   0    1.50    0.94
  12  19   0    2.02    0.74
 -13 -19   0    0.10    0.64
  13  19   0    0.84    0.55
 -14 -19   0    1.08    0.75
  14  19   0    3.40    0.90
   8 -20   0    0.78    0.58
  -8  20   0    0.15    0.40
   7 -20   0    1.58    0.74
  -7  20   0    0.56    0.58
   6 -20   0    9.71    1.45
  -6  20   0    7.30    1.31
   5 -20   0   -0.22    0.51
  -5  20   0   -0.51    0.48
   4 -20   0   -0.50    0.47
  -4  20   0   -0.99    0.46
   3 -20   0   -0.28    0.47
  -3  20   0    0.93    0.57
   2 -20   0    0.28    0.61
  -2  20   0    0.65    0.59
  -2  20   0    0.08    0.15
   1 -20   0    0.88    0.64
  -1  20   0    0.34    0.21
  -1  20   0    0.45    0.62
   0 -20   0    2.92    0.92
   0  20   0    3.27    0.77
   0  20   0    2.60    0.61
  -1 -20   0   10.34    1.80
   1  20   0   12.87    1.33
   1  20   0   12.20    1.32
  -2 -20   0    0.80    0.70
   2  20   0    0.95    0.36
   2  20   0    0.35    0.46
  -3 -20   0    1.36    0.82
   3  20   0    3.71    0.75
   3  20   0    2.82    0.62
  -4 -20   0    2.92    1.11
   4  20   0    4.81    0.86
   4  20   0    4.33    0.76
  -5 -20   0   19.79    2.99
   5  20   0   24.82    2.00
   5  20   0   25.15    2.41
  -6 -20   0    0.30    0.46
   6  20   0    0.69    0.39
   6  20   0    0.52    0.31
  -7 -20   0    1.28    0.88
   7  20   0    0.62    0.44
   7  20   0    1.10    0.34
  -8 -20   0    0.79    0.67
   8  20   0    0.37    0.45
  -9 -20   0   -0.35    0.46
   9  20   0    0.21    0.40
 -10 -20   0    0.86    0.72
  10  20   0    0.22    0.49
 -11 -20   0    2.17    1.04
  11  20   0    5.87    1.09
 -12 -20   0    2.10    0.95
  12  20   0    3.26    0.85
 -13 -20   0    0.79    0.63
  13  20   0    2.14    0.83
   7 -21   0    1.37    0.75
  -7  21   0    0.80    0.69
   6 -21   0    1.20    0.63
  -6  21   0    0.93    0.67
   5 -21   0   -0.55    0.38
  -5  21   0   -0.26    0.51
   4 -21   0    1.15    0.68
  -4  21   0    0.95    0.68
   3 -21   0    1.86    0.79
  -3  21   0    0.99    0.64
   2 -21   0   21.01    2.21
  -2  21   0   17.76    1.82
  -2  21   0   16.00    1.60
   1 -21   0    0.19    0.64
  -1  21   0    0.93    0.33
  -1  21   0    1.08    0.66
   0 -21   0    1.72    0.83
   0  21   0    3.34    0.83
   0  21   0    3.36    0.63
  -1 -21   0    0.23    0.69
   1  21   0   -0.12    0.27
   1  21   0    0.77    0.51
  -2 -21   0    4.96    1.31
   2  21   0    5.07    0.90
   2  21   0    3.88    0.82
  -3 -21   0    3.17    1.05
   3  21   0    3.78    0.78
   3  21   0    3.80    0.78
  -4 -21   0   -0.27    0.44
   4  21   0   -0.15    0.24
   4  21   0    0.28    0.40
  -5 -21   0    2.50    0.96
   5  21   0    2.27    0.60
   5  21   0    2.48    0.56
  -6 -21   0    0.91    0.73
   6  21   0    1.61    0.46
   6  21   0    1.85    0.56
  -7 -21   0    3.25    1.09
   7  21   0    3.14    0.78
   7  21   0    3.80    0.61
  -8 -21   0    9.21    2.07
   8  21   0   14.58    1.66
  -9 -21   0    2.81    1.13
   9  21   0    3.32    0.82
 -10 -21   0   -0.44    0.47
  10  21   0    0.06    0.53
 -11 -21   0    0.44    0.65
  11  21   0    0.87    0.59
 -12 -21   0    0.59    0.56
  12  21   0    0.68    0.54
 -13 -21   0   -0.41    0.36
  13  21   0   -0.31    0.50
   6 -22   0   -0.39    0.58
  -6  22   0   -1.02    0.54
   5 -22   0    3.02    0.84
  -5  22   0    1.73    0.87
   4 -22   0    7.44    1.36
  -4  22   0    5.52    1.16
   3 -22   0    0.55    0.56
  -3  22   0    1.62    0.78
   2 -22   0    0.50    0.62
  -2  22   0    1.16    0.61
   1 -22   0   10.58    1.87
  -1  22   0   14.02    1.69
  -1  22   0   13.31    1.34
   0 -22   0    0.51    0.61
   0  22   0    1.07    0.63
   0  22   0    1.17    0.42
  -1 -22   0    2.35    0.98
   1  22   0    3.26    0.81
   1  22   0    2.75    0.62
  -2 -22   0    2.43    1.02
   2  22   0    1.75    0.51
   2  22   0    2.94    0.77
  -3 -22   0    0.52    0.70
   3  22   0    0.64    0.45
   3  22   0    1.74    0.51
  -4 -22   0    0.20    0.55
   4  22   0    1.95    0.53
   4  22   0    1.23    0.51
  -5 -22   0    3.37    1.12
   5  22   0    3.74    0.80
   5  22   0    3.92    0.75
  -6 -22   0    1.45    0.74
   6  22   0    2.80    0.59
   6  22   0    3.18    0.78
  -7 -22   0    1.06    0.63
   7  22   0    1.00    0.50
  -8 -22   0    0.55    0.47
   8  22   0    0.13    0.42
  -9 -22   0    0.52    0.57
   9  22   0    0.00    0.40
 -10 -22   0    1.05    0.73
  10  22   0    2.02    0.68
 -11 -22   0    3.86    1.18
  11  22   0    4.75    1.08
 -12 -22   0   -0.03    0.47
  12  22   0    0.00    0.49
   5 -23   0    0.51    0.67
  -5  23   0    0.67    0.69
   4 -23   0   -0.24    0.51
  -4  23   0   -0.46    0.52
   3 -23   0    0.28    0.53
  -3  23   0   -0.24    0.69
   2 -23   0    1.01    0.75
  -2  23   0    0.06    0.57
   1 -23   0    5.15    1.30
  -1  23   0    6.82    1.11
  -1  23   0    5.01    0.65
   0 -23   0   -0.19    0.63
   0  23   0    1.41    0.66
   0  23   0    0.20    0.20
  -1 -23   0    1.77    0.78
   1  23   0    2.59    0.79
   1  23   0    1.90    0.46
  -2 -23   0   -0.40    0.55
   2  23   0    0.88    0.62
   2  23   0    0.63    0.37
  -3 -23   0   12.01    2.19
   3  23   0   14.54    1.53
   3  23   0   16.24    1.65
  -4 -23   0    0.13    0.56
   4  23   0    0.26    0.28
   4  23   0   -0.37    0.42
  -5 -23   0    1.12    0.82
   5  23   0    1.99    0.61
   5  23   0    2.72    0.71
  -6 -23   0    1.53    0.86
   6  23   0    3.38    0.82
   6  23   0    1.98    0.45
  -7 -23   0    0.41    0.55
   7  23   0    0.29    0.45
  -8 -23   0    3.09    1.02
   8  23   0    2.72    0.84
  -9 -23   0    0.30    0.57
   9  23   0   -0.36    0.35
 -10 -23   0    0.17    0.51
  10  23   0    1.28    0.52
 -11 -23   0    0.55    0.51
  11  23   0   -0.17    0.52
   3 -24   0    0.14    0.51
  -3  24   0   -0.86    0.56
   2 -24   0    5.70    1.32
  -2  24   0    7.71    1.29
   1 -24   0   -0.23    0.55
  -1  24   0    0.02    0.47
   0 -24   0    3.36    1.09
   0  24   0    2.89    0.60
   0  24   0    3.00    0.91
  -1 -24   0    0.22    0.55
   1  24   0    0.97    0.62
   1  24   0    0.80    0.31
  -2 -24   0    3.34    1.16
   2  24   0    4.35    0.92
   2  24   0    2.80    0.62
  -3 -24   0    1.99    0.87
   3  24   0    2.78    0.72
   3  24   0    2.11    0.58
  -4 -24   0    0.27    0.57
   4  24   0    0.33    0.29
   4  24   0    0.28    0.46
  -5 -24   0    1.72    0.76
   5  24   0    3.76    0.75
   5  24   0    3.87    0.88
  -6 -24   0    0.81    0.63
   6  24   0    0.56    0.47
  -7 -24   0    0.30    0.63
   7  24   0    0.44    0.44
  -8 -24   0    0.67    0.76
   8  24   0   -0.03    0.43
  -9 -24   0    2.93    1.09
   9  24   0    3.64    0.88
 -10 -24   0    0.18    0.48
  10  24   0    0.89    0.36
   1 -25   0   -0.37    0.61
  -1  25   0    0.71    0.59
   0 -25   0    0.08    0.72
   0  25   0   -0.33    0.54
   0  25   0    0.72    0.28
  -1 -25   0   -0.55    0.50
   1  25   0    0.38    0.25
   1  25   0    0.26    0.59
  -2 -25   0    4.34    1.28
   2  25   0    8.49    0.99
   2  25   0    6.50    1.17
  -3 -25   0    1.16    0.67
   3  25   0    1.35    0.64
   3  25   0    1.38    0.47
  -4 -25   0    1.37    0.73
   4  25   0    0.04    0.48
   4  25   0    0.99    0.48
  -5 -25   0    1.22    0.78
   5  25   0    0.51    0.43
   5  25   0    1.08    0.35
  -6 -25   0    0.10    0.60
   6  25   0    0.26    0.43
  -7 -25   0   -0.15    0.50
   7  25   0    0.10    0.40
  -8 -25   0   -0.03    0.41
   8  25   0    0.06    0.37
  -2 -26   0    2.15    0.75
   2  26   0    1.43    0.64
   2  26   0    1.02    0.36
  -3 -26   0   -0.47    0.54
   3  26   0    0.32    0.47
   3  26   0    0.27    0.37
  -4 -26   0   -0.21    0.52
   4  26   0   -0.50    0.30
   4  26   0   -0.44    0.27
  -5 -26   0   -0.24    0.50
   5  26   0   -0.41    0.28
  -6 -26   0    1.59    0.83
   6  26   0    3.01    0.70
   4  26  -1    1.36    0.51
   4  26  -1    0.21    0.35
  -4 -26   1    0.71    0.67
   3  26  -1    2.68    0.69
   3  26  -1    1.24    0.50
  -3 -26   1    1.41    0.76
   8  25  -1    1.40    0.43
  -8 -25   1   -0.73    0.52
   7  25  -1    3.00    0.76
  -7 -25   1    2.61    1.11
   6  25  -1    2.30    0.70
  -6 -25   1    2.33    1.06
   5  25  -1    0.65    0.41
  -5 -25   1    0.29    0.54
   4  25  -1    0.41    0.36
   4  25  -1   -0.51    0.35
  -4 -25   1    0.94    0.71
   3  25  -1    1.70    0.68
   3  25  -1    2.10    0.61
  -3 -25   1    1.78    0.93
   2  25  -1    6.70    1.15
   2  25  -1    6.14    1.04
  -2 -25   1    5.40    1.37
   1  25  -1    6.07    1.08
   1  25  -1    4.93    0.84
  -1 -25   1    3.79    1.17
   0  25  -1    6.96    0.82
   0  25  -1    6.22    1.17
   0 -25   1    4.97    1.31
  -1  25  -1    0.26    0.55
   1 -25   1   -0.32    0.63
   9  24  -1    0.02    0.41
  -9 -24   1   -0.30    0.55
   8  24  -1   -0.07    0.34
  -8 -24   1    0.08    0.65
   7  24  -1    0.21    0.48
  -7 -24   1    0.33    0.56
   6  24  -1    0.66    0.46
  -6 -24   1    1.20    0.82
   5  24  -1    0.91    0.48
   5  24  -1    0.48    0.33
  -5 -24   1    0.74    0.75
   4  24  -1    1.22    0.56
   4  24  -1    1.31    0.49
  -4 -24   1   -0.04    0.50
   3  24  -1    9.52    1.31
   3  24  -1   10.45    1.20
  -3 -24   1    5.96    1.52
   2  24  -1    0.81    0.32
   2  24  -1    0.14    0.55
  -2 -24   1   -0.29    0.51
   1  24  -1    0.80    0.30
   1  24  -1    0.91    0.68
  -1 -24   1    0.86    0.63
   0  24  -1   -0.90    0.53
   0  24  -1    0.02    0.20
   0 -24   1   -1.07    0.41
  -1  24  -1    1.04    0.67
   1 -24   1    0.69    0.75
  -2  24  -1    0.21    0.68
   2 -24   1    0.68    0.65
  -3  24  -1    1.53    0.81
   3 -24   1    1.11    0.71
  11  23  -1    0.33    0.51
 -11 -23   1    0.62    0.53
  10  23  -1    5.55    1.08
 -10 -23   1    3.83    1.22
   9  23  -1    0.28    0.48
  -9 -23   1    0.24    0.58
   8  23  -1    0.78    0.57
  -8 -23   1    0.44    0.61
   7  23  -1    1.26    0.63
  -7 -23   1    0.55    0.80
   6  23  -1    3.67    0.87
  -6 -23   1    1.78    0.94
   5  23  -1   -0.20    0.37
   5  23  -1    1.04    0.48
  -5 -23   1    0.27    0.66
   4  23  -1   10.42    1.23
   4  23  -1    9.95    1.22
  -4 -23   1    5.60    1.55
   3  23  -1    3.35    0.83
   3  23  -1    3.96    0.77
  -3 -23   1    2.46    0.84
   2  23  -1    0.14    0.54
   2  23  -1    0.50    0.31
  -2 -23   1    0.25    0.60
   1  23  -1    3.83    0.73
   1  23  -1    3.8    0.90
  -1 -23   1    4.27    1.17
   0  23  -1    0.73    0.65
   0  23  -1    0.01    0.19
   0 -23   1   -0.46    0.57
  -1  23  -1    8.54    0.88
  -1  23  -1    6.20    1.14
   1 -23   1    5.21    1.35
  -2  23  -1   -0.21    0.62
   2 -23   1   -0.54    0.43
  -3  23  -1    0.56    0.62
   3 -23   1    0.59    0.71
  -4  23  -1   -0.75    0.49
   4 -23   1    0.43    0.61
  12  22  -1    0.09    0.49
 -12 -22   1   -0.80    0.39
  11  22  -1    3.32    0.93
 -11 -22   1    1.41    0.65
  10  22  -1   -0.30    0.39
 -10 -22   1    0.24    0.55
   9  22  -1    2.52    0.82
  -9 -22   1    0.42    0.71
   8  22  -1   -0.37    0.39
  -8 -22   1    0.38    0.59
   7  22  -1    2.80    0.78
  -7 -22   1    2.19    0.98
   6  22  -1    1.14    0.57
   6  22  -1    0.96    0.33
  -6 -22   1   -0.30    0.48
   5  22  -1   -0.31    0.28
   5  22  -1    0.49    0.30
  -5 -22   1    0.33    0.74
   4  22  -1   19.32    1.72
   4  22  -1   20.84    2.01
  -4 -22   1   12.22    2.40
   3  22  -1    0.05    0.47
   3  22  -1    0.15    0.27
  -3 -22   1    0.30    0.59
   2  22  -1    1.47    0.50
   2  22  -1    1.25    0.66
  -2 -22   1    0.55    0.68
   1  22  -1   -0.06    0.49
   1  22  -1    0.57    0.32
  -1 -22   1    0.78    0.70
   0  22  -1   11.88    1.30
   0  22  -1   13.40    1.58
   0 -22   1   11.27    1.92
  -1  22  -1    0.59    0.24
  -1  22  -1    0.17    0.57
   1 -22   1   -0.68    0.55
  -2  22  -1   -1.08    0.53
   2 -22   1   -0.21    0.47
  -3  22  -1   -0.04    0.45
   3 -22   1   -0.26    0.50
  -4  22  -1    0.72    0.58
   4 -22   1    0.33    0.60
  -5  22  -1    1.16    0.70
   5 -22   1    0.94    0.65
  -6  22  -1    0.63    0.80
   6 -22   1    2.97    0.82
  13  21  -1    0.18    0.57
 -13 -21   1    0.21    0.46
  12  21  -1    4.00    1.01
 -12 -21   1    2.08    0.82
  11  21  -1    1.14    0.70
 -11 -21   1    1.54    0.83
  10  21  -1    0.11    0.50
 -10 -21   1    0.30    0.61
   9  21  -1    0.46    0.49
  -9 -21   1    0.13    0.55
   8  21  -1    3.65    0.84
  -8 -21   1    0.76    0.80
   7  21  -1    7.67    1.31
  -7 -21   1    4.13    1.39
   6  21  -1    3.57    0.63
   6  21  -1    4.66    0.96
  -6 -21   1    4.34    1.29
   5  21  -1    0.28    0.27
   5  21  -1   -0.27    0.27
  -5 -21   1    0.37    0.73
   4  21  -1    0.19    0.36
   4  21  -1    0.96    0.44
  -4 -21   1    1.06    0.83
   3  21  -1    5.64    0.90
   3  21  -1    5.68    0.98
  -3 -21   1    3.78    1.16
   2  21  -1    5.48    0.94
   2  21  -1    5.16    0.94
  -2 -21   1    4.08    1.16
   1  21  -1    0.75    0.39
   1  21  -1    1.00    0.53
  -1 -21   1    0.60    0.67
   0  21  -1   11.44    1.25
   0  21  -1   12.38    1.51
   0 -21   1    8.92    1.75
  -1  21  -1    2.91    0.83
  -1  21  -1    1.76    0.48
   1 -21   1    2.16    0.90
  -2  21  -1    0.34    0.57
   2 -21   1    0.61    0.68
  -3  21  -1    7.20    1.16
   3 -21   1    5.88    1.26
  -4  21  -1    5.09    1.08
   4 -21   1    7.65    1.42
  -5  21  -1   -0.51    0.52
   5 -21   1    0.60    0.59
  -6  21  -1    0.45    0.62
   6 -21   1    1.47    0.70
  -7  21  -1    0.97    0.66
   7 -21   1    2.14    0.74
  13  20  -1    0.31    0.51
 -13 -20   1   -0.11    0.43
  12  20  -1    1.00    0.59
 -12 -20   1    0.97    0.71
  11  20  -1    2.38    0.72
 -11 -20   1    1.87    0.89
  10  20  -1    8.79    1.43
 -10 -20   1    5.98    1.47
   9  20  -1   14.07    1.63
  -9 -20   1    8.92    1.90
   8  20  -1    1.49    0.57
  -8 -20   1    0.47    0.70
   7  20  -1    1.72    0.36
   7  20  -1    1.79    0.67
  -7 -20   1    1.37    0.75
   6  20  -1    3.38    0.60
   6  20  -1    3.78    0.81
  -6 -20   1    3.51    1.15
   5  20  -1   -0.04    0.31
   5  20  -1    0.46    0.31
  -5 -20   1    0.42    0.57
   4  20  -1    3.51    0.77
   4  20  -1    3.51    0.67
  -4 -20   1    1.63    0.85
   3  20  -1   17.04    1.56
   3  20  -1   18.83    1.82
  -3 -20   1   12.32    2.20
   2  20  -1   -0.17    0.37
   2  20  -1    0.04    0.24
  -2 -20   1    0.11    0.45
   1  20  -1    1.37    0.59
   1  20  -1    1.61    0.47
  -1 -20   1    0.19    0.69
   0  20  -1    0.56    0.30
   0  20  -1    0.23    0.51
   0 -20   1   -0.20    0.41
  -1  20  -1   24.80    2.30
  -1  20  -1   25.85    2.26
   1 -20   1   23.95    2.66
  -2  20  -1    1.18    0.29
  -2  20  -1    1.63    0.69
   2 -20   1    1.31    0.75
  -3  20  -1    0.10    0.53
   3 -20   1    2.01    0.80
  -4  20  -1    0.59    0.57
   4 -20   1    0.40    0.58
  -5  20  -1    0.95    0.65
   5 -20   1    1.64    0.63
  -6  20  -1    0.70    0.65
   6 -20   1    3.78    0.90
  -7  20  -1    2.09    0.76
   7 -20   1    3.28    0.91
  -8  20  -1    0.56    0.45
   8 -20   1    0.62    0.52
  14  19  -1    2.57    0.85
 -14 -19   1    2.20    0.89
  13  19  -1    1.47    0.67
 -13 -19   1    0.80    0.70
  12  19  -1    2.82    0.86
 -12 -19   1    1.86    0.90
  11  19  -1    2.54    0.82
 -11 -19   1    1.20    0.67
  10  19  -1    0.08    0.51
 -10 -19   1    0.12    0.56
   9  19  -1    0.09    0.47
  -9 -19   1   -0.36    0.41
   8  19  -1    0.25    0.30
  -8 -19   1    0.21    0.55
   7  19  -1    1.79    0.41
   7  19  -1    1.88    0.55
  -7 -19   1    1.43    0.79
   6  19  -1   19.88    1.64
   6  19  -1   22.12    2.11
  -6 -19   1   14.94    2.46
   5  19  -1   10.74    1.22
   5  19  -1    9.32    1.02
  -5 -19   1    6.57    1.51
   4  19  -1    0.46    0.34
   4  19  -1    0.69    0.40
  -4 -19   1    0.32    0.60
   3  19  -1    1.60    0.55
   3  19  -1    0.68    0.44
  -3 -19   1    0.46    0.65
   2  19  -1   12.35    1.26
   2  19  -1   12.84    1.37
  -2 -19   1    9.67    1.77
   1  19  -1    0.27    0.26
   1  19  -1   -0.66    0.33
  -1 -19   1    0.32    0.53
   0  19  -1    0.32    0.23
   0  19  -1   -0.21    0.46
   0 -19   1    0.77    0.60
  -1  19  -1    0.09    0.49
  -1  19  -1    0.64    0.32
   1 -19   1    0.19    0.52
  -2  19  -1    0.23    0.49
  -2  19  -1    0.55    0.23
   2 -19   1    0.02    0.52
  -3  19  -1    2.23    0.40
  -3  19  -1    2.31    0.73
   3 -19   1    3.22    0.91
  -4  19  -1    2.09    0.75
   4 -19   1    3.23    0.92
  -5  19  -1    3.53    0.87
   5 -19   1    4.11    0.99
  -6  19  -1   -0.72    0.58
   6 -19   1    0.88    0.55
  -7  19  -1   -0.01    0.53
   7 -19   1    0.34    0.50
  -8  19  -1   -0.50    0.37
   8 -19   1    0.15    0.44
  -9  19  -1   -0.29    0.34
   9 -19   1    0.48    0.48
  14  18  -1    0.72    0.56
 -14 -18   1    0.00    0.56
  13  18  -1    1.53    0.70
 -13 -18   1    1.78    1.02
  12  18  -1    0.46    0.57
 -12 -18   1   -0.17    0.51
  11  18  -1   -0.01    0.39
 -11 -18   1   -0.01    0.51
  10  18  -1   14.73    1.68
 -10 -18   1    7.90    1.75
   9  18  -1    7.59    1.29
  -9 -18   1    4.67    1.33
   8  18  -1    9.97    1.33
   8  18  -1   11.54    0.98
  -8 -18   1    7.78    1.65
   7  18  -1    0.80    0.31
   7  18  -1    0.84    0.39
  -7 -18   1    0.88    0.59
   6  18  -1    2.31    0.49
   6  18  -1    2.87    0.72
  -6 -18   1    2.84    0.98
   5  18  -1    5.22    0.75
   5  18  -1    6.88    1.09
  -5 -18   1    4.20    1.21
   4  18  -1   -0.04    0.29
   4  18  -1    0.21    0.27
  -4 -18   1    0.17    0.54
   3  18  -1    0.28    0.27
   3  18  -1   -0.32    0.27
  -3 -18   1   -0.56    0.42
   2  18  -1    8.26    0.98
   2  18  -1    7.36    0.96
  -2 -18   1    6.02    1.30
   1  18  -1    0.55    0.40
   1  18  -1    1.26    0.40
  -1 -18   1    1.64    0.72
   0  18  -1    2.23    0.63
   0  18  -1    2.06    0.49
   0 -18   1    1.47    0.72
  -1  18  -1    0.08    0.44
  -1  18  -1    0.08    0.18
   1 -18   1    0.48    0.45
  -2  18  -1    5.14    0.93
  -2  18  -1    5.25    0.67
   2 -18   1    5.72    1.18
  -3  18  -1   -0.19    0.10
  -3  18  -1   -0.39    0.43
   3 -18   1   -0.14    0.40
  -4  18  -1    1.46    0.64
   4 -18   1    2.29    0.76
  -5  18  -1   -0.09    0.48
   5 -18   1    0.78    0.59
  -6  18  -1   -0.23    0.48
   6 -18   1    0.02    0.48
  -7  18  -1    1.60    0.66
   7 -18   1    3.04    0.79
  -8  18  -1   -0.91    0.38
   8 -18   1    0.28    0.51
  -9  18  -1   -0.22    0.40
   9 -18   1    0.02    0.43
  15  17  -1    0.11    0.49
 -15 -17   1   -0.08    0.45
  14  17  -1    2.09    0.73
 -14 -17   1   -0.94    0.62
 -14 -17   1    1.09    0.73
  13  17  -1    4.76    1.04
 -13 -17   1    2.91    1.05
 -13 -17   1    3.11    0.96
  12  17  -1    0.49    0.57
 -12 -17   1   -0.64    0.46
 -12 -17   1   -0.16    0.57
  11  17  -1    2.34    0.74
 -11 -17   1    0.58    0.54
 -11 -17   1    0.85    0.62
  10  17  -1    0.91    0.57
 -10 -17   1    0.47    0.76
 -10 -17   1    0.14    0.39
   9  17  -1   13.53    1.62
  -9 -17   1   13.05    1.51
  -9 -17   1    8.20    1.77
   8  17  -1    0.37    0.50
   8  17  -1    0.14    0.16
  -8 -17   1   -0.37    0.31
  -8 -17   1    0.35    0.55
   7  17  -1    0.30    0.23
   7  17  -1    0.36    0.31
  -7 -17   1   -0.09    0.47
  -7 -17   1    0.14    0.27
   6  17  -1    5.31    0.95
   6  17  -1    5.05    0.65
  -6 -17   1    5.19    0.70
  -6 -17   1    2.93    1.07
   5  17  -1    5.18    0.95
   5  17  -1    4.87    0.68
  -5 -17   1    5.03    0.78
  -5 -17   1    3.92    1.10
   4  17  -1    2.97    0.67
   4  17  -1    2.45    0.49
  -4 -17   1    2.02    0.40
  -4 -17   1    2.05    0.84
   3  17  -1   24.35    2.23
   3  17  -1   23.62    1.86
  -3 -17   1   20.12    2.42
  -3 -17   1   21.97    2.11
   2  17  -1    2.27    0.54
   2  17  -1    2.42    0.52
  -2 -17   1    0.42    0.60
  -2 -17   1    1.83    0.40
   1  17  -1   12.50    1.27
   1  17  -1   14.42    1.41
  -1 -17   1   12.36    1.92
  -1 -17   1   12.90    1.30
   0  17  -1    0.23    0.37
   0  17  -1    0.82    0.31
   0 -17   1    0.55    0.48
   0 -17   1    0.35    0.16
  -1  17  -1    1.31    0.35
  -1  17  -1    2.20    0.56
   1 -17   1    0.87    0.64
   1 -17   1    0.66    0.20
  -2  17  -1    1.96    0.62
  -2  17  -1    2.23    0.47
   2 -17   1    2.68    0.86
   2 -17   1    3.09    0.55
  -3  17  -1   -0.11    0.12
  -3  17  -1    0.19    0.44
   3 -17   1    0.20    0.22
   3 -17   1   -0.16    0.39
  -4  17  -1    2.81    0.36
  -4  17  -1    3.04    0.71
   4 -17   1    3.33    0.85
   4 -17   1    2.25    0.54
  -5  17  -1   -0.18    0.47
   5 -17   1   -0.22    0.20
   5 -17   1   -0.52    0.40
  -6  17  -1    1.52    0.65
   6 -17   1    1.83    0.69
  -7  17  -1   -0.18    0.71
  -7  17  -1   -0.61    0.42
   7 -17   1    0.45    0.46
  -8  17  -1    3.93    0.84
  -8  17  -1    1.86    0.95
   8 -17   1    6.98    1.11
  -9  17  -1   -0.02    0.85
  -9  17  -1   -0.10    0.47
   9 -17   1   -0.07    0.40
 -10  17  -1    0.10    0.39
  10 -17   1    0.56    0.47
  15  16  -1    1.28    0.62
 -15 -16   1   -0.88    0.65
 -15 -16   1    1.10    0.70
  14  16  -1    0.64    0.61
 -14 -16   1   -0.34    0.73
 -14 -16   1    0.79    0.79
  13  16  -1   -0.58    0.45
 -13 -16   1   -0.36    0.58
 -13 -16   1   -0.32    0.53
  12  16  -1    1.16    0.62
 -12 -16   1    0.56    0.70
 -12 -16   1    0.95    0.74
  11  16  -1    1.03    0.59
 -11 -16   1    0.20    0.54
 -11 -16   1    0.43    0.54
  10  16  -1    3.29    0.87
 -10 -16   1    2.71    0.90
 -10 -16   1    2.89    1.02
   9  16  -1   23.51    2.26
  -9 -16   1   19.15    2.19
  -9 -16   1   18.73    2.34
   8  16  -1    0.09    0.15
   8  16  -1   -0.05    0.38
  -8 -16   1   -0.23    0.35
  -8 -16   1    0.46    0.43
   7  16  -1    1.52    0.48
   7  16  -1    0.38    0.22
  -7 -16   1    0.52    0.42
  -7 -16   1   -0.09    0.45
   6  16  -1    8.87    1.12
   6  16  -1    9.04    0.82
  -6 -16   1    6.32    1.44
  -6 -16   1    8.09    1.05
   5  16  -1   27.01    1.95
   5  16  -1   27.21    2.47
  -5 -16   1   24.95    2.41
  -5 -16   1   19.16    2.52
   4  16  -1    2.35    0.61
   4  16  -1    1.94    0.47
  -4 -16   1    2.58    0.52
  -4 -16   1    2.45    0.83
   3  16  -1   12.39    1.18
   3  16  -1   13.29    1.44
  -3 -16   1   12.41    1.95
  -3 -16   1   13.50    1.35
   2  16  -1    0.31    0.31
   2  16  -1    0.20    0.28
  -2 -16   1    0.16    0.47
  -2 -16   1    0.28    0.18
   1  16  -1    0.11    0.32
   1  16  -1    0.01    0.21
  -1 -16   1    0.06    0.17
  -1 -16   1   -0.07    0.39
   0  16  -1    0.96    0.40
   0  16  -1    0.88    0.30
   0 -16   1    0.97    0.48
   0 -16   1    0.65    0.27
  -1  16  -1    7.50    0.86
  -1  16  -1    7.36    1.00
   1 -16   1    7.70    0.87
   1 -16   1    6.80    1.24
  -2  16  -1    1.77    0.41
  -2  16  -1    1.59    0.50
   2 -16   1    0.95    0.36
   2 -16   1    2.06    0.70
  -3  16  -1    2.44    0.63
  -3  16  -1    2.59    0.45
   3 -16   1    3.11    0.59
   3 -16   1    2.36    0.75
  -4  16  -1    0.07    0.41
  -4  16  -1    0.18    0.14
   4 -16   1    0.40    0.44
   4 -16   1    0.15    0.27
  -5  16  -1    4.82    0.86
   5 -16   1    6.51    1.08
   5 -16   1    3.65    0.78
  -6  16  -1   -0.21    0.36
   6 -16   1    0.12    0.50
  -7  16  -1   -0.33    0.39
   7 -16   1    0.90    0.53
  -8  16  -1   -0.70    0.33
  -8  16  -1   -0.67    0.76
   8 -16   1   -0.15    0.33
  -9  16  -1    1.17    0.95
  -9  16  -1    0.48    0.52
   9 -16   1    1.04    0.58
 -10  16  -1    0.55    0.48
 -10  16  -1    1.94    0.87
  10 -16   1    2.25    0.67
 -11  16  -1    0.06    0.88
 -11  16  -1    0.01    0.34
  11 -16   1   -0.40    0.38
  16  15  -1   -0.36    0.45
 -16 -15   1   -0.08    0.74
 -16 -15   1   -0.04    0.44
  15  15  -1    1.54    0.73
 -15 -15   1    0.30    0.62
 -15 -15   1    0.64    0.78
  14  15  -1    0.79    0.63
 -14 -15   1    0.31    0.57
 -14 -15   1   -0.85    0.51
  13  15  -1    6.01    1.16
 -13 -15   1    4.48    1.13
 -13 -15   1    3.21    1.16
  12  15  -1   16.75    1.82
 -12 -15   1    8.69    1.83
 -12 -15   1   15.55    1.90
  11  15  -1   -0.07    0.48
 -11 -15   1    0.33    0.40
 -11 -15   1   -0.74    0.51
  10  15  -1    0.68    0.54
 -10 -15   1    0.45    0.55
 -10 -15   1    1.39    0.69
   9  15  -1    2.69    0.38
   9  15  -1    3.22    0.82
  -9 -15   1    3.08    0.82
  -9 -15   1    2.16    0.85
   8  15  -1   29.11    2.72
   8  15  -1   28.93    2.00
  -8 -15   1   26.55    2.72
  -8 -15   1   22.17    2.72
   7  15  -1   -0.17    0.15
   7  15  -1   -0.11    0.28
  -7 -15   1   -0.23    0.42
  -7 -15   1    0.19    0.44
   6  15  -1   -0.22    0.24
   6  15  -1   -0.14    0.19
  -6 -15   1   -0.63    0.23
  -6 -15   1    0.07    0.42
   5  15  -1    1.50    0.35
   5  15  -1    1.41    0.52
  -5 -15   1    1.49    0.44
  -5 -15   1    1.66    0.71
   4  15  -1    0.51    0.28
   4  15  -1    0.84    0.42
  -4 -15   1    1.19    0.62
  -4 -15   1    0.65    0.30
   3  15  -1    0.05    0.26
   3  15  -1    0.23    0.25
  -3 -15   1    0.06    0.20
  -3 -15   1    0.32    0.44
   2  15  -1   24.74    2.11
   2  15  -1   17.48    2.00
   2  15  -1   23.93    1.75
  -2 -15   1   20.57    2.26
  -2 -15   1   23.37    2.07
   1  15  -1    0.28    0.30
   1  15  -1   -0.03    0.20
  -1 -15   1    0.27    0.22
  -1 -15   1    0.18    0.38
   0  15  -1   14.11    1.37
   0  15  -1   12.47    1.24
   0 -15   1   13.70    1.37
   0 -15   1   13.55    1.85
  -1  15  -1    0.10    0.16
  -1  15  -1    0.09    0.29
   1 -15   1   -0.32    0.29
   1 -15   1    0.35    0.23
  -2  15  -1    0.04    0.14
  -2  15  -1   -0.18    0.28
   2 -15   1    0.25    0.40
   2 -15   1    0.23    0.25
  -3  15  -1   -0.25    0.32
  -3  15  -1    0.08    0.18
   3 -15   1    0.19    0.22
   3 -15   1    0.09    0.37
  -4  15  -1    7.46    0.77
  -4  15  -1    6.41    0.94
   4 -15   1    8.10    1.23
   4 -15   1    7.75    0.98
  -5  15  -1    3.21    0.71
   5 -15   1    2.81    0.75
   5 -15   1    3.04    0.66
  -6  15  -1    0.00    0.30
   6 -15   1    0.10    0.38
   6 -15   1   -0.39    0.25
  -7  15  -1    3.50    0.76
   7 -15   1    5.86    0.99
  -8  15  -1    0.84    0.44
  -8  15  -1   -0.77    0.68
   8 -15   1    0.04    0.40
  -9  15  -1    0.64    0.89
  -9  15  -1    0.28    0.42
   9 -15   1    1.22    0.54
 -10  15  -1   -0.11    0.91
 -10  15  -1   -0.64    0.39
  10 -15   1    0.00    0.35
 -11  15  -1   -0.60    0.36
 -11  15  -1    0.31    0.94
  11 -15   1    0.07    0.45
  16  14  -1   -0.12    0.45
 -16 -14   1   -0.17    0.49
 -16 -14   1    0.37    0.81
  15  14  -1   13.71    1.62
 -15 -14   1    7.35    1.71
 -15 -14   1   10.11    1.80
  14  14  -1    5.23    1.06
 -14 -14   1    3.41    1.11
 -14 -14   1    3.57    1.01
  13  14  -1   -0.53    0.51
 -13 -14   1   -0.12    0.45
 -13 -14   1   -0.28    0.49
  12  14  -1    0.10    0.60
 -12 -14   1    1.25    0.80
 -12 -14   1    0.95    0.64
  11  14  -1    6.05    1.17
 -11 -14   1    5.40    1.31
 -11 -14   1    5.19    1.14
  10  14  -1    1.59    0.65
 -10 -14   1    0.96    0.56
 -10 -14   1    1.18    0.64
   9  14  -1    3.59    0.44
   9  14  -1    4.63    0.95
  -9 -14   1    3.41    0.94
  -9 -14   1    3.68    0.90
   8  14  -1    6.06    1.04
   8  14  -1    5.44    0.55
  -8 -14   1    6.40    1.07
  -8 -14   1    4.58    1.15
   7  14  -1    0.09    0.36
   7  14  -1    0.01    0.14
  -7 -14   1    0.10    0.33
  -7 -14   1    0.18    0.42
   6  14  -1    1.48    0.48
   6  14  -1    1.62    0.31
  -6 -14   1    1.53    0.55
  -6 -14   1    0.88    0.54
   5  14  -1    2.90    0.65
   5  14  -1    3.13    0.46
  -5 -14   1    2.76    0.63
  -5 -14   1    2.97    0.86
   4  14  -1   37.54    2.64
   4  14  -1   39.07    3.30
  -4 -14   1   35.81    3.30
  -4 -14   1   31.86    3.31
   3  14  -1    9.79    1.05
   3  14  -1    8.03    0.81
  -3 -14   1    6.81    1.32
  -3 -14   1    8.49    0.97
   2  14  -1    2.26    0.49
   2  14  -1    1.93    0.39
   2  14  -1    1.88    0.40
  -2 -14   1    1.87    0.42
  -2 -14   1    0.91    0.57
   1  14  -1    9.32    1.02
   1  14  -1   11.10    0.94
   1  14  -1    7.87    0.93
  -1 -14   1    9.45    1.01
  -1 -14   1   10.01    1.51
   0  14  -1   -0.12    0.14
   0  14  -1   -0.18    0.23
   0 -14   1   -0.10    0.15
   0 -14   1    0.15    0.36
  -1  14  -1    9.97    1.03
  -1  14  -1   10.45    1.06
   1 -14   1   11.33    1.56
   1 -14   1   10.34    1.11
  -2  14  -1    2.20    0.43
  -2  14  -1    1.96    0.49
   2 -14   1    1.49    0.61
   2 -14   1    2.66    0.53
  -3  14  -1    1.38    0.46
  -3  14  -1    1.34    0.31
   3 -14   1    1.45    0.42
   3 -14   1    1.23    0.52
  -4  14  -1    1.37    0.30
  -4  14  -1    2.15    0.51
   4 -14   1    2.43    0.63
   4 -14   1    0.95    0.44
  -5  14  -1    4.05    0.74
   5 -14   1    3.06    0.70
   5 -14   1    4.54    0.86
  -6  14  -1   -0.12    0.29
   6 -14   1    0.23    0.36
   6 -14   1    0.73    0.50
  -7  14  -1   -0.21    0.24
   7 -14   1    0.18    0.41
  -8  14  -1    0.55    0.32
  -8  14  -1   -0.01    0.76
   8 -14   1    0.07    0.42
  -9  14  -1    6.39    1.00
  -9  14  -1    6.59    1.43
   9 -14   1    7.79    1.14
 -10  14  -1    0.05    0.40
 -10  14  -1    0.86    1.01
  10 -14   1    0.46    0.46
 -11  14  -1    3.60    1.05
 -11  14  -1    2.25    0.66
  11 -14   1    3.01    0.75
 -12  14  -1   -0.13    0.44
 -12  14  -1    1.00    1.01
  12 -14   1    0.23    0.44
  16  13  -1    0.98    0.64
 -16 -13   1    0.76    0.85
  15  13  -1    0.24    0.55
 -15 -13   1   -0.12    0.59
  14  13  -1    0.51    0.58
 -14 -13   1    0.05    0.55
 -14 -13   1    1.15    0.71
  13  13  -1   -0.72    0.52
 -13 -13   1    0.05    0.49
 -13 -13   1   -0.37    0.50
  12  13  -1   -0.16    0.48
 -12 -13   1    0.13    0.55
 -12 -13   1   -0.30    0.53
  11  13  -1   13.83    1.59
 -11 -13   1   12.51    1.60
 -11 -13   1    8.46    1.69
  10  13  -1    0.19    0.45
 -10 -13   1    0.06    0.48
 -10 -13   1    0.06    0.35
   9  13  -1    8.91    0.75
   9  13  -1   10.65    1.29
  -9 -13   1    6.66    1.40
  -9 -13   1    9.99    1.32
   8  13  -1    2.59    0.69
   8  13  -1    3.26    0.39
  -8 -13   1    3.42    0.80
  -8 -13   1    2.31    0.69
   7  13  -1    9.31    0.78
   7  13  -1    9.77    1.20
  -7 -13   1    9.30    1.25
  -7 -13   1    9.02    1.56
   6  13  -1    0.49    0.20
   6  13  -1    0.62    0.33
  -6 -13   1    0.38    0.43
  -6 -13   1    0.31    0.37
   5  13  -1    6.59    0.97
   5  13  -1    5.96    0.61
  -5 -13   1    6.58    0.96
  -5 -13   1    6.42    1.24
   4  13  -1    1.34    0.31
   4  13  -1    1.55    0.46
  -4 -13   1    1.31    0.42
  -4 -13   1    0.46    0.46
   3  13  -1    1.50    0.43
   3  13  -1    1.27    0.31
   3  13  -1    1.15    0.29
  -3 -13   1    1.11    0.56
  -3 -13   1    1.16    0.35
   2  13  -1   12.59    1.01
   2  13  -1   11.05    1.18
   2  13  -1    9.03    1.10
  -2 -13   1    9.30    1.48
  -2 -13   1   13.07    1.19
   1  13  -1    0.01    0.21
   1  13  -1    0.12    0.22
   1  13  -1    0.12    0.14
  -1 -13   1   -0.20    0.14
  -1 -13   1   -0.07    0.35
   0  13  -1    4.92    0.60
   0  13  -1    5.79    0.70
   0  13  -1    5.27    0.71
   0 -13   1    5.36    0.68
   0 -13   1    4.67    0.98
  -1  13  -1    1.95    0.47
  -1  13  -1    3.08    0.52
   1 -13   1    2.20    0.47
   1 -13   1    1.94    0.65
  -2  13  -1   30.26    2.75
  -2  13  -1   34.27    2.47
   2 -13   1   31.64    2.93
   2 -13   1   34.98    2.93
  -3  13  -1    3.72    0.50
  -3  13  -1    4.28    0.66
   3 -13   1    4.48    0.75
   3 -13   1    4.26    0.83
  -4  13  -1    1.63    0.31
  -4  13  -1    2.16    0.50
   4 -13   1    2.24    0.61
   4 -13   1    1.71    0.51
  -5  13  -1    1.79    0.48
   5 -13   1    2.45    0.58
   5 -13   1    2.58    0.64
  -6  13  -1    1.33    0.41
   6 -13   1    1.04    0.47
   6 -13   1    0.67    0.15
   6 -13   1    0.91    0.45
  -7  13  -1    7.26    0.96
   7 -13   1    6.79    1.06
  -8  13  -1    1.11    0.88
  -8  13  -1    2.57    0.61
   8 -13   1    3.39    0.72
  -9  13  -1    0.38    0.39
  -9  13  -1   -0.38    0.70
   9 -13   1    0.51    0.41
 -10  13  -1    1.32    0.51
 -10  13  -1    2.21    1.06
  10 -13   1    0.81    0.47
 -11  13  -1    3.06    0.95
 -11  13  -1    0.19    0.41
  11 -13   1    0.32    0.47
 -12  13  -1    0.70    0.99
 -12  13  -1    1.65    0.61
  12 -13   1    1.66    0.61
 -13  13  -1    2.29    0.61
 -13  13  -1    1.30    0.94
  13 -13   1    2.19    0.70
  16  12  -1    0.03    0.43
  16  12  -1   -0.58    0.52
 -16 -12   1   -0.38    0.72
  15  12  -1   -0.42    0.49
  15  12  -1   -0.18    0.48
 -15 -12   1   -0.27    0.70
  14  12  -1    1.01    0.69
 -14 -12   1    0.97    0.70
  13  12  -1    0.23    0.58
 -13 -12   1    0.83    0.70
  12  12  -1    4.92    0.98
 -12 -12   1    2.65    0.85
 -12 -12   1    2.61    0.86
  11  12  -1    0.20    0.48
 -11 -12   1    0.93    0.58
 -11 -12   1    0.53    0.54
  10  12  -1   10.18    1.25
 -10 -12   1    6.39    1.32
 -10 -12   1    7.43    1.28
   9  12  -1    2.84    0.72
   9  12  -1    2.28    0.32
  -9 -12   1    2.82    0.80
  -9 -12   1    1.58    0.71
   8  12  -1    0.58    0.16
   8  12  -1    0.30    0.35
  -8 -12   1    0.14    0.39
  -8 -12   1    0.18    0.42
   7  12  -1    7.65    1.12
   7  12  -1    7.12    0.62
  -7 -12   1    6.36    1.26
  -7 -12   1    6.98    1.09
   6  12  -1    1.59    0.49
   6  12  -1    1.10    0.24
  -6 -12   1    0.84    0.57
  -6 -12   1    1.48    0.53
   5  12  -1   37.14    3.31
   5  12  -1   39.52    2.62
  -5 -12   1   36.19    3.38
  -5 -12   1   33.41    3.33
   4  12  -1    4.69    0.56
   4  12  -1    5.10    0.83
  -4 -12   1    5.18    1.08
  -4 -12   1    5.24    0.80
   3  12  -1    1.27    0.29
   3  12  -1    1.48    0.42
   3  12  -1    0.75    0.26
  -3 -12   1    1.58    0.41
  -3 -12   1    0.89    0.54
   2  12  -1    0.22    0.18
   2  12  -1    0.33    0.27
   2  12  -1    0.16    0.19
  -2 -12   1    0.55    0.27
  -2 -12   1    0.16    0.38
   1  12  -1   17.07    1.33
   1  12  -1   16.42    1.56
   1  12  -1   15.02    1.55
  -1 -12   1   18.69    1.83
  -1 -12   1   16.06    1.58
   0  12  -1    4.38    0.67
   0  12  -1    4.31    0.55
   0  12  -1    3.50    0.56
   0 -12   1    3.34    0.83
   0 -12   1    5.51    0.64
  -1  12  -1    0.75    0.32
  -1  12  -1    0.72    0.32
   1 -12   1    1.40    0.52
   1 -12   1    1.34    0.36
  -2  12  -1   29.62    2.58
  -2  12  -1   28.52    2.27
   2 -12   1   30.37    2.76
   2 -12   1   33.79    2.76
  -3  12  -1   -0.18    0.22
  -3  12  -1    0.33    0.16
   3 -12   1    0.32    0.27
   3 -12   1   -0.16    0.28
  -4  12  -1    2.52    0.55
  -4  12  -1    4.23    0.45
   4 -12   1    2.28    0.63
   4 -12   1    4.71    0.78
  -5  12  -1   16.83    1.53
   5 -12   1   16.63    1.85
   5 -12   1   21.95    1.80
  -6  12  -1    9.64    1.01
   6 -12   1   10.19    0.93
   6 -12   1    9.11    1.22
   6 -12   1   11.11    1.17
  -7  12  -1    4.65    0.77
   7 -12   1    5.47    0.90
   7 -12   1    6.37    1.08
  -8  12  -1    0.26    0.36
   8 -12   1    0.60    0.44
  -9  12  -1    0.68    0.39
  -9  12  -1   -0.67    0.69
   9 -12   1    0.42    0.40
 -10  12  -1    0.13    0.31
 -10  12  -1    0.23    0.88
  10 -12   1    0.84    0.48
 -11  12  -1    2.81    1.00
 -11  12  -1    0.67    0.38
  11 -12   1    0.40    0.43
 -12  12  -1    0.11    0.39
 -12  12  -1    0.56    0.96
  12 -12   1    0.30    0.41
 -13  12  -1   -0.42    0.31
 -13  12  -1   -0.05    0.88
  13 -12   1    0.13    0.46
  17  11  -1    0.80    0.65
 -17 -11   1    0.68    0.99
  16  11  -1   -0.33    0.48
  16  11  -1   -0.16    0.43
 -16 -11   1   -0.13    0.87
  15  11  -1   -0.22    0.53
  15  11  -1   -0.75    0.42
 -15 -11   1   -1.13    0.55
  14  11  -1    5.29    1.06
  14  11  -1    3.23    1.40
 -14 -11   1    5.30    1.19
  13  11  -1    2.30    0.75
  13  11  -1    2.30    0.83
 -13 -11   1    1.75    0.84
  12  11  -1    3.21    0.97
  12  11  -1    4.82    0.96
 -12 -11   1    4.66    1.06
  11  11  -1    0.73    0.50
 -11 -11   1    0.63    0.51
  10  11  -1    4.60    0.86
 -10 -11   1    2.89    0.94
 -10 -11   1    3.08    0.28
 -10 -11   1    3.15    0.79
   9  11  -1    6.14    1.02
   9  11  -1    5.80    0.50
  -9 -11   1    4.67    1.10
  -9 -11   1    5.32    0.98
   8  11  -1   17.95    1.27
   8  11  -1   19.71    1.86
  -8 -11   1   17.91    1.84
  -8 -11   1   16.13    1.22
  -8 -11   1   17.53    1.96
   7  11  -1    8.92    1.13
   7  11  -1    9.58    0.72
  -7 -11   1    8.79    1.13
  -7 -11   1    7.53    1.36
  -7 -11   1    8.58    0.65
   6  11  -1   43.07    2.88
   6  11  -1   43.00    3.69
  -6 -11   1   38.87    3.66
  -6 -11   1   39.39    3.74
   5  11  -1    2.17    0.51
   5  11  -1    1.91    0.31
  -5 -11   1    1.75    0.65
  -5 -11   1    2.82    0.61
   4  11  -1   19.56    1.48
   4  11  -1   21.87    1.95
  -4 -11   1   20.36    1.95
  -4 -11   1   18.31    2.04
   3  11  -1    0.42    0.30
   3  11  -1    0.34    0.19
   3  11  -1    0.17    0.18
  -3 -11   1    0.03    0.36
  -3 -11   1    0.36    0.26
   2  11  -1    3.79    0.59
   2  11  -1    3.42    0.47
   2  11  -1    4.48    0.67
  -2 -11   1    3.67    0.61
  -2 -11   1    2.88    0.78
   1  11  -1   48.96    4.65
   1  11  -1   56.05    3.78
   1  11  -1   57.79    4.56
  -1 -11   1   56.29    4.68
  -1 -11   1   50.29    4.46
   0  11  -1   -0.12    0.17
   0  11  -1    0.09    0.14
   0  11  -1    0.04    0.20
   0 -11   1   -0.01    0.31
   0 -11   1    0.10    0.21
  -1  11  -1    1.52    0.38
  -1  11  -1    2.36    0.43
   1 -11   1    1.85    0.59
   1 -11   1    1.44    0.40
  -2  11  -1   11.19    1.05
  -2  11  -1   10.88    1.00
   2 -11   1   10.97    1.27
   2 -11   1   11.21    1.18
  -3  11  -1   10.72    1.05
  -3  11  -1   12.58    1.08
   3 -11   1   11.43    1.25
   3 -11   1   12.74    1.29
  -4  11  -1    0.22    0.14
  -4  11  -1    0.60    0.32
   4 -11   1    0.71    0.36
   4 -11   1    0.53    0.36
  -5  11  -1    0.44    0.27
   5 -11   1    0.28    0.29
   5 -11   1    0.10    0.12
   5 -11   1    0.50    0.39
  -6  11  -1   16.33    1.37
   6 -11   1   15.19    1.33
   6 -11   1   16.31    1.72
   6 -11   1   13.91    1.46
  -7  11  -1    0.85    0.35
   7 -11   1    1.80    0.56
   7 -11   1    0.57    0.35
  -8  11  -1    0.43    0.33
   8 -11   1    0.70    0.42
  -9  11  -1    7.13    0.97
  -9  11  -1    6.48    1.38
   9 -11   1    8.92    1.02
 -10  11  -1    1.90    0.97
 -10  11  -1    1.69    0.47
  10 -11   1    1.92    0.57
 -11  11  -1   -0.41    0.26
 -11  11  -1    1.79    0.89
  11 -11   1    0.20    0.36
 -12  11  -1   -0.52    0.32
 -12  11  -1    0.44    0.91
  12 -11   1   -0.70    0.33
 -13  11  -1    1.16    0.50
 -13  11  -1    0.62    0.94
  13 -11   1    1.18    0.57
 -14  11  -1   -0.30    0.34
 -14  11  -1   -0.38    0.81
  14 -11   1   -0.33    0.49
  17  10  -1   -0.09    0.58
 -17 -10   1   -0.02    0.86
  16  10  -1   -0.10    0.52
  16  10  -1   -0.03    0.34
 -16 -10   1    0.02    0.77
  15  10  -1    0.23    0.48
  15  10  -1   -0.01    0.50
 -15 -10   1    0.35    0.64
  14  10  -1    1.99    0.72
  14  10  -1    0.74    0.63
 -14 -10   1    1.59    0.81
  13  10  -1    0.07    0.43
  13  10  -1    0.16    0.54
 -13 -10   1    0.32    0.63
  12  10  -1   -0.06    0.47
  12  10  -1    0.35    0.56
 -12 -10   1    0.38    0.54
  11  10  -1   14.94    1.64
  11  10  -1   11.63    1.84
 -11 -10   1   14.88    1.75
  10  10  -1    1.57    0.57
  10  10  -1    1.49    0.65
 -10 -10   1    1.59    0.63
 -10 -10   1    1.82    0.19
   9  10  -1    5.65    0.96
  -9 -10   1    4.53    0.91
  -9 -10   1    5.50    0.41
   8  10  -1    3.00    0.70
   8  10  -1    2.96    0.30
  -8 -10   1    3.12    0.69
  -8 -10   1    2.34    0.22
  -8 -10   1    2.64    0.78
   7  10  -1    0.41    0.34
   7  10  -1    0.48    0.15
  -7 -10   1    0.10    0.34
  -7 -10   1    0.45    0.09
  -7 -10   1    0.70    0.52
   6  10  -1    0.42    0.30
   6  10  -1    0.13    0.10
  -6 -10   1    0.11    0.04
  -6 -10   1   -0.09    0.33
  -6 -10   1   -0.03    0.33
   5  10  -1    4.68    0.45
   5  10  -1    5.41    0.82
  -5 -10   1    4.40    0.36
  -5 -10   1    4.61    0.98
  -5 -10   1    4.80    0.78
   4  10  -1   21.83    1.98
   4  10  -1   20.57    1.51
  -4 -10   1   18.29    2.04
  -4 -10   1   21.34    2.01
   3  10  -1    3.94    0.46
   3  10  -1    3.74    0.51
   3  10  -1    4.33    0.70
  -3 -10   1    3.57    0.61
  -3 -10   1    3.80    0.86
   2  10  -1   12.53    1.28
   2  10  -1   14.51    1.33
   2  10  -1   12.14    1.03
  -2 -10   1   11.98    1.47
  -2 -10   1   14.03    1.33
   1  10  -1    3.34    0.46
   1  10  -1    2.98    0.53
   1  10  -1    4.09    0.63
  -1 -10   1    3.36    0.80
  -1 -10   1    3.47    0.56
   0  10  -1   22.66    1.97
   0  10  -1   18.48    2.01
   0  10  -1   23.27    1.68
   0 -10   1   22.27    2.10
   0 -10   1   24.56    2.06
  -1  10  -1    3.77    0.54
  -1  10  -1    2.92    0.53
  -1  10  -1    3.66    0.50
   1 -10   1    3.57    0.59
   1 -10   1    4.79    0.87
  -2  10  -1    3.57    0.49
  -2  10  -1    3.98    0.55
   2 -10   1    5.35    0.74
   2 -10   1    4.51    0.80
  -3  10  -1    7.70    0.79
  -3  10  -1    7.38    0.74
   3 -10   1    8.24    0.94
   3 -10   1    7.68    1.04
  -4  10  -1    3.15    0.34
  -4  10  -1    2.48    0.45
   4 -10   1    2.64    0.58
   4 -10   1    4.17    0.69
   4 -10   1    2.17    0.39
  -5  10  -1    2.19    0.46
   5 -10   1    1.55    0.50
   5 -10   1    3.89    0.65
   5 -10   1    1.90    0.35
  -6  10  -1    6.17    0.81
   6 -10   1    6.50    0.91
   6 -10   1    8.89    1.05
  -7  10  -1   15.10    1.42
   7 -10   1   17.16    1.83
   7 -10   1   17.49    1.56
  -8  10  -1    0.65    0.33
   8 -10   1    1.66    0.49
  -9  10  -1    2.45    0.52
  -9  10  -1    0.80    0.80
   9 -10   1    2.96    0.63
 -10  10  -1   -0.80    0.66
 -10  10  -1   -0.13    0.23
  10 -10   1   -0.28    0.31
 -11  10  -1    1.44    0.94
 -12  10  -1    0.24    0.29
 -12  10  -1    1.12    0.96
  12 -10   1   -0.05    0.35
 -13  10  -1    2.05    1.05
 -13  10  -1    2.35    0.56
  13 -10   1    2.07    0.61
 -14  10  -1    0.98    1.04
 -14  10  -1    1.02    0.47
  14 -10   1    0.10    0.49
  17   9  -1    2.03    0.90
 -17  -9   1    3.10    1.19
  16   9  -1    0.09    0.55
 -16  -9   1    1.12    0.85
  15   9  -1   -0.08    0.51
  15   9  -1    0.92    0.57
 -15  -9   1    0.47    0.68
  14   9  -1    2.31    0.86
  14   9  -1    4.08    0.88
 -14  -9   1    2.68    0.93
  13   9  -1    1.22    0.60
  13   9  -1    1.74    0.68
 -13  -9   1    0.66    0.61
  12   9  -1    1.21    0.68
  12   9  -1    0.38    0.49
 -12  -9   1    0.67    0.57
  11   9  -1    0.28    0.42
  11   9  -1   -0.18    0.36
 -11  -9   1    0.42    0.44
  10   9  -1    1.04    0.57
  10   9  -1    0.90    0.51
 -10  -9   1    0.43    0.46
 -10  -9   1    1.00    0.14
   9   9  -1    0.87    0.46
   9   9  -1    0.62    0.51
  -9  -9   1    0.69    0.13
  -9  -9   1    0.50    0.08
  -9  -9   1    1.01    0.48
   8   9  -1   11.77    1.27
  -8  -9   1   10.01    0.75
  -8  -9   1    9.85    1.25
   7   9  -1   33.38    2.20
   7   9  -1   35.21    2.93
  -7  -9   1   30.96    2.92
  -7  -9   1   29.41    2.17
  -7  -9   1   30.95    2.94
   6   9  -1    3.36    0.66
   6   9  -1    3.37    0.32
  -6  -9   1    3.25    0.62
  -6  -9   1    2.91    0.76
  -6  -9   1    2.84    0.27
   5   9  -1    0.68    0.15
   5   9  -1    0.77    0.38
  -5  -9   1    0.77    0.38
  -5  -9   1    0.45    0.09
  -5  -9   1    0.19    0.43
   4   9  -1    4.70    0.75
   4   9  -1    4.58    0.42
  -4  -9   1    3.69    0.84
  -4  -9   1    4.14    0.36
  -4  -9   1    5.30    0.76
   3   9  -1    5.37    0.59
   3   9  -1    5.66    0.76
   3   9  -1    4.77    0.45
  -3  -9   1    4.84    0.65
  -3  -9   1    4.26    0.38
  -3  -9   1    3.89    0.83
   2   9  -1    0.32    0.23
   2   9  -1    0.41    0.21
   2   9  -1    0.51    0.17
  -2  -9   1    0.06    0.32
  -2  -9   1    0.30    0.20
   1   9  -1    5.73    0.70
   1   9  -1    5.93    0.70
   1   9  -1    6.05    0.57
  -1  -9   1    6.73    0.72
  -1  -9   1    5.44    0.96
   0   9  -1   35.37    3.47
   0   9  -1   39.56    2.80
   0   9  -1   42.49    3.36
   0  -9   1   38.94    3.34
   0  -9   1   42.89    3.49
  -1   9  -1   27.38    2.29
  -1   9  -1   22.53    2.39
  -1   9  -1   28.24    1.97
   1  -9   1   29.64    2.40
   1  -9   1   27.75    2.43
  -2   9  -1    1.10    0.28
  -2   9  -1    0.73    0.23
   2  -9   1    0.17    0.28
   2  -9   1    0.40    0.37
  -3   9  -1    0.66    0.26
  -3   9  -1    1.17    0.23
   3  -9   1    1.38    0.39
   3  -9   1    0.32    0.32
   3  -9   1    1.08    0.27
  -4   9  -1   13.62    1.12
  -4   9  -1   13.04    1.10
   4  -9   1   10.38    1.16
   4  -9   1   14.90    1.41
   4  -9   1   13.54    1.26
  -5   9  -1   -0.19    0.17
   5  -9   1    0.49    0.28
   5  -9   1    0.30    0.13
   5  -9   1    0.09    0.30
   5  -9   1    0.34    0.17
  -6   9  -1   15.68    1.30
   6  -9   1   11.73    1.60
   6  -9   1   18.37    1.46
  -7   9  -1   -0.21    0.21
   7  -9   1    0.14    0.27
   7  -9   1   -0.30    0.25
  -8   9  -1    0.46    0.30
   8  -9   1    0.15    0.29
  -9   9  -1    0.20    0.73
  -9   9  -1    1.35    0.40
   9  -9   1    1.41    0.48
 -10   9  -1    1.25    0.84
 -10   9  -1    2.03    0.52
  10  -9   1    2.44    0.58
 -11   9  -1    2.77    0.59
 -11   9  -1    5.28    1.21
  11  -9   1    4.14    0.80
 -12   9  -1    1.64    0.96
 -12   9  -1    1.37    0.47
  12  -9   1    2.37    0.63
 -13   9  -1    1.39    0.99
 -13   9  -1    1.43    0.40
  13  -9   1    0.14    0.46
 -14   9  -1    2.82    1.15
 -14   9  -1    1.43    0.40
  14  -9   1    1.11    0.61
  17   8  -1   -0.22    0.55
 -17  -8   1    0.16    0.96
  16   8  -1    2.59    0.87
 -16  -8   1    4.62    1.30
  15   8  -1    2.65    0.68
  15   8  -1    1.78    0.82
 -15  -8   1    2.67    1.00
  14   8  -1    0.94    0.69
  14   8  -1    2.31    0.65
 -14  -8   1    0.84    0.77
  13   8  -1    1.46    0.72
  13   8  -1    1.53    0.62
 -13  -8   1    1.70    0.71
  12   8  -1    1.63    0.74
  12   8  -1    2.83    0.70
 -12  -8   1    2.54    0.80
  11   8  -1    2.30    0.74
  11   8  -1    4.24    0.83
 -11  -8   1    2.70    0.77
 -11  -8   1    2.66    0.24
  10   8  -1    2.17    0.68
  10   8  -1    2.68    0.65
 -10  -8   1    2.17    0.22
 -10  -8   1    1.74    0.60
   9   8  -1    4.83    0.95
   9   8  -1    5.69    0.92
  -9  -8   1    5.57    0.97
  -9  -8   1    5.03    0.42
  -9  -8   1    5.51    0.42
   8   8  -1    0.16    0.36
   8   8  -1    0.43    0.38
  -8  -8   1    0.26    0.07
  -8  -8   1    0.41    0.10
  -8  -8   1   -0.20    0.29
   7   8  -1   32.05    2.09
   7   8  -1   25.57    2.62
   7   8  -1   31.72    2.78
  -7  -8   1   30.40    2.82
  -7  -8   1   30.06    2.08
   6   8  -1    0.09    0.08
   6   8  -1    0.09    0.30
  -6  -8   1    0.35    0.46
  -6  -8   1    0.07    0.07
  -6  -8   1    0.11    0.28
   5   8  -1    0.39    0.12
   5   8  -1    0.21    0.30
  -5  -8   1    0.11    0.37
  -5  -8   1    0.28    0.09
  -5  -8   1    0.33    0.27
   4   8  -1   16.12    1.53
   4   8  -1   16.76    1.17
   4   8  -1   17.05    1.59
  -4  -8   1   16.47    1.59
  -4  -8   1   15.39    1.14
  -4  -8   1   16.44    1.68
   3   8  -1   31.97    2.62
   3   8  -1   33.00    2.64
   3   8  -1   29.10    2.07
  -3  -8   1   27.05    2.03
  -3  -8   1   30.65    2.67
  -3  -8   1   27.22    2.58
   2   8  -1    4.73    0.44
   2   8  -1    5.36    0.62
   2   8  -1    5.15    0.58
  -2  -8   1    2.81    0.68
  -2  -8   1    4.42    0.59
  -2  -8   1    4.61    0.38
   1   8  -1   17.39    1.23
   1   8  -1   17.14    1.50
   1   8  -1   14.41    1.51
  -1  -8   1   17.02    1.54
  -1  -8   1   15.26    1.57
   0   8  -1   12.63    1.21
   0   8  -1   14.11    1.03
   0   8  -1   11.74    1.25
   0  -8   1   14.71    1.38
   0  -8   1   13.40    1.26
  -1   8  -1    1.97    0.39
  -1   8  -1    3.30    0.39
  -1   8  -1    2.37    0.36
   1  -8   1    2.76    0.46
   1  -8   1    2.34    0.56
  -2   8  -1    6.84    0.64
  -2   8  -1    5.75    0.70
  -2   8  -1    6.91    0.65
   2  -8   1    5.81    0.67
   2  -8   1    6.65    0.90
   2  -8   1    7.16    0.79
  -3   8  -1   19.52    1.50
  -3   8  -1   20.70    1.66
   3  -8   1   20.10    1.74
   3  -8   1   16.99    1.71
   3  -8   1   21.43    1.90
  -4   8  -1   13.40    1.09
  -4   8  -1   13.67    1.09
   4  -8   1   14.13    1.24
   4  -8   1   10.44    1.15
   4  -8   1   13.40    1.37
  -5   8  -1    0.11    0.20
   5  -8   1    0.13    0.20
   5  -8   1    0.38    0.12
   5  -8   1   -0.10    0.21
  -6   8  -1    4.89    0.63
   6  -8   1    3.48    0.76
   6  -8   1    5.82    0.66
  -7   8  -1    0.43    0.26
   7  -8   1    0.08    0.33
   7  -8   1    0.73    0.32
  -8   8  -1    5.62    0.72
   8  -8   1    5.06    0.77
  -9   8  -1   -0.11    0.66
  -9   8  -1    1.27    0.37
   9  -8   1    1.71    0.50
 -10   8  -1   -0.38    0.64
 -10   8  -1    0.01    0.25
  10  -8   1   -0.04    0.33
 -11   8  -1    4.77    0.71
 -11   8  -1    3.80    1.21
  11  -8   1    4.06    0.80
 -12   8  -1   -0.28    0.22
 -12   8  -1   -0.16    0.82
  12  -8   1    0.24    0.37
 -13   8  -1    1.83    0.46
 -13   8  -1    3.91    1.21
  13  -8   1    0.88    0.50
 -14   8  -1    1.25    1.04
 -14   8  -1    1.28    0.35
  14  -8   1    1.04    0.58
 -15   8  -1   -0.44    0.29
 -15   8  -1   -0.38    0.87
  15  -8   1    0.06    0.45
  17   7  -1    0.77    0.63
 -17  -7   1    1.49    0.96
  16   7  -1    1.46    0.70
 -16  -7   1    0.43    0.82
  15   7  -1    3.97    0.73
  15   7  -1    2.14    0.84
 -15  -7   1    3.27    1.05
  14   7  -1    2.83    0.91
  14   7  -1    4.03    0.82
 -14  -7   1    5.90    1.16
  13   7  -1   -0.33    0.43
  13   7  -1    0.21    0.45
 -13  -7   1    0.02    0.52
  12   7  -1   -0.03    0.47
  12   7  -1   -0.12    0.37
 -12  -7   1   -0.22    0.43
  11   7  -1    7.89    1.30
  11   7  -1    9.81    1.18
 -11  -7   1    8.24    0.63
 -11  -7   1    6.93    1.25
  10   7  -1   15.66    1.46
  10   7  -1   11.45    1.39
 -10  -7   1   13.81    1.50
 -10  -7   1   11.39    0.86
 -10  -7   1   11.61    0.88
   9   7  -1    0.72    0.45
   9   7  -1    1.40    0.49
  -9  -7   1    0.42    0.41
  -9  -7   1    0.94    0.13
  -9  -7   1    0.84    0.15
   8   7  -1    5.80    0.98
   8   7  -1    7.63    0.91
  -8  -7   1    4.76    0.43
  -8  -7   1    5.84    0.91
  -8  -7   1    5.55    0.43
   7   7  -1    1.31    0.52
   7   7  -1    2.36    0.56
  -7  -7   1    2.17    0.21
  -7  -7   1    1.97    0.49
   6   7  -1    5.34    0.88
   6   7  -1    4.14    0.36
   6   7  -1    3.60    0.70
  -6  -7   1    4.82    0.73
  -6  -7   1    4.12    0.35
   5   7  -1    2.80    0.26
   5   7  -1    3.00    0.59
  -5  -7   1    2.80    0.68
  -5  -7   1    3.22    0.56
  -5  -7   1    2.48    0.24
   4   7  -1   34.45    2.96
   4   7  -1   35.47    2.31
   4   7  -1   35.34    2.96
  -4  -7   1   33.80    2.99
  -4  -7   1   31.24    2.29
  -4  -7   1   32.72    2.88
   3   7  -1   15.87    1.18
   3   7  -1   17.42    1.57
   3   7  -1   17.74    1.54
  -3  -7   1   16.18    1.60
  -3  -7   1   18.40    1.60
  -3  -7   1   15.44    1.16
   2   7  -1    5.83    0.48
   2   7  -1    5.41    0.61
   2   7  -1    6.11    0.66
  -2  -7   1    5.19    0.43
  -2  -7   1    5.48    0.83
  -2  -7   1    5.45    0.65
   1   7  -1   17.73    1.23
   1   7  -1   18.47    1.54
   1   7  -1   16.95    1.56
  -1  -7   1   16.26    1.19
  -1  -7   1   16.48    1.55
  -1  -7   1   15.21    1.56
   0   7  -1    6.43    0.75
   0   7  -1    8.64    0.75
   0   7  -1    7.31    0.61
   0  -7   1    7.56    0.76
   0  -7   1    6.94    0.72
   0  -7   1    6.62    0.83
  -1   7  -1   27.36    2.72
  -1   7  -1   32.83    2.22
  -1   7  -1   33.70    2.62
   1  -7   1   28.88    2.63
   1  -7   1   33.01    2.76
   1  -7   1   32.45    2.60
  -2   7  -1   13.15    1.42
  -2   7  -1   16.20    1.31
  -2   7  -1   17.09    1.19
   2  -7   1   17.66    1.43
   2  -7   1   12.76    1.33
   2  -7   1   15.96    1.47
  -3   7  -1    5.41    0.51
  -3   7  -1    4.32    0.44
   3  -7   1    7.07    0.67
   3  -7   1    3.82    0.65
   3  -7   1    3.35    0.51
  -4   7  -1   10.24    0.86
  -4   7  -1    9.96    0.82
   4  -7   1   10.09    1.10
   4  -7   1    8.14    0.88
   4  -7   1    9.75    0.96
  -5   7  -1   10.73    0.97
   5  -7   1   11.94    1.29
   5  -7   1   11.67    1.09
  -6   7  -1    0.03    0.18
   6  -7   1   -0.02    0.27
   6  -7   1    0.09    0.21
  -7   7  -1    0.87    0.27
   7  -7   1    0.96    0.34
   7  -7   1    0.02    0.37
  -8   7  -1    0.58    0.28
   8  -7   1    0.72    0.32
  -9   7  -1    0.46    0.28
  -9   7  -1   -0.10    0.55
   9  -7   1    0.48    0.31
 -10   7  -1    5.80    0.79
 -10   7  -1    5.35    1.24
  10  -7   1    6.39    0.92
 -11   7  -1    0.09    0.30
 -11   7  -1   -0.04    0.69
  11  -7   1   -0.10    0.30
 -12   7  -1    1.93    0.97
 -12   7  -1    0.95    0.36
  12  -7   1    0.62    0.45
 -13   7  -1    0.94    0.84
 -13   7  -1    0.10    0.29
  13  -7   1   -0.40    0.38
 -14   7  -1    0.58    0.28
 -14   7  -1    0.33    0.92
  14  -7   1    1.05    0.56
 -15   7  -1    0.35    0.88
 -15   7  -1    0.14    0.31
  15  -7   1   -0.12    0.43
  17   6  -1    6.83    1.37
 -17  -6   1    8.78    1.71
  16   6  -1    0.28    0.54
 -16  -6   1   -1.08    0.74
  15   6  -1    0.42    0.63
 -15  -6   1    0.42    0.76
  14   6  -1   -0.07    0.48
  14   6  -1    0.30    0.45
 -14  -6   1   -0.07    0.61
  13   6  -1   -0.54    0.42
  13   6  -1    0.48    0.42
 -13  -6   1    0.30    0.56
  12   6  -1    0.39    0.49
  12   6  -1    1.13    0.52
 -12  -6   1    1.01    0.17
 -12  -6   1    1.56    0.67
  11   6  -1    5.77    1.10
  11   6  -1    7.33    1.03
 -11  -6   1    7.39    1.23
 -11  -6   1    5.47    0.49
  10   6  -1   12.44    1.41
 -10  -6   1   14.19    1.52
 -10  -6   1   11.48    0.89
   9   6  -1    1.75    0.52
   9   6  -1    1.15    0.48
  -9  -6   1    1.87    0.22
  -9  -6   1    1.85    0.17
  -9  -6   1    1.82    0.55
   8   6  -1    1.61    0.50
   8   6  -1    1.39    0.49
  -8  -6   1    1.76    0.20
  -8  -6   1    1.42    0.49
  -8  -6   1    1.45    0.16
   7   6  -1   14.32    1.52
   7   6  -1   16.53    1.59
  -7  -6   1   16.45    1.09
  -7  -6   1   15.38    1.58
  -7  -6   1   14.44    1.08
   6   6  -1   20.13    1.85
   6   6  -1   17.73    1.77
  -6  -6   1   19.38    1.33
  -6  -6   1   18.92    1.85
   5   6  -1   18.11    1.84
   5   6  -1   22.38    1.97
   5   6  -1   21.46    1.46
  -5  -6   1   22.82    1.99
  -5  -6   1   20.51    1.45
   4   6  -1    1.62    0.18
   4   6  -1    1.46    0.32
   4   6  -1    1.19    0.35
  -4  -6   1    1.68    0.17
  -4  -6   1    2.09    0.40
  -4  -6   1    1.38    0.45
   3   6  -1    4.53    0.52
   3   6  -1    4.95    0.59
   3   6  -1    4.36    0.37
  -3  -6   1    4.94    0.60
  -3  -6   1    4.29    0.35
  -3  -6   1    4.92    0.78
   2   6  -1   14.88    1.12
   2   6  -1   17.60    1.46
   2   6  -1   17.06    1.45
  -2  -6   1   14.78    1.45
  -2  -6   1   14.61    1.10
  -2  -6   1   16.35    1.47
   1   6  -1   21.01    1.46
   1   6  -1   23.61    1.83
   1   6  -1   20.39    1.86
  -1  -6   1   21.29    1.87
  -1  -6   1   19.76    1.44
  -1  -6   1   19.00    1.80
  -1  -6   1   20.55    1.82
   0   6  -1   31.68    2.53
   0   6  -1   32.86    2.10
   0   6  -1   26.09    2.61
   0  -6   1   31.19    2.63
   0  -6   1   28.17    2.53
   0  -6   1   30.73    2.50
   0  -6   1   30.34    2.07
  -1   6  -1    6.60    0.65
  -1   6  -1    8.03    0.59
  -1   6  -1    6.17    0.70
   1  -6   1    6.33    0.67
   1  -6   1    7.25    0.77
   1  -6   1    7.04    0.73
  -2   6  -1   17.55    1.73
  -2   6  -1   20.54    1.59
  -2   6  -1   19.48    1.39
   2  -6   1   17.00    1.59
   2  -6   1   21.40    1.77
   2  -6   1   17.28    1.61
  -3   6  -1    5.08    0.47
  -3   6  -1    5.14    0.50
   3  -6   1    5.19    0.53
   3  -6   1    5.99    0.67
   3  -6   1    4.00    0.61
  -4   6  -1    0.33    0.18
   4  -6   1    0.33    0.29
   4  -6   1    0.29    0.20
  -5   6  -1    1.46    0.32
   5  -6   1    1.96    0.39
   5  -6   1    0.94    0.41
  -6   6  -1    2.63    0.43
   6  -6   1    3.75    0.55
   6  -6   1    2.72    0.63
  -7   6  -1   24.67    1.80
   7  -6   1   24.13    1.98
   7  -6   1   21.67    2.33
  -8   6  -1    1.74    0.38
   8  -6   1    1.40    0.38
  -9   6  -1    1.45    0.35
  -9   6  -1    2.43    0.76
   9  -6   1    1.12    0.39
 -10   6  -1   -0.11    0.65
 -10   6  -1    0.76    0.31
  10  -6   1    0.09    0.36
 -11   6  -1    0.06    0.71
 -11   6  -1    0.30    0.30
  11  -6   1    0.35    0.37
 -12   6  -1    0.03    0.21
 -12   6  -1    0.02    0.79
  12  -6   1   -0.21    0.38
 -13   6  -1    1.19    0.34
 -13   6  -1    0.31    0.88
  13  -6   1    1.17    0.55
 -14   6  -1   -0.11    0.23
 -14   6  -1    0.61    0.85
  14  -6   1    0.19    0.47
 -15   6  -1   -0.38    0.23
 -15   6  -1   -0.09    0.84
  15  -6   1   -0.27    0.44
  17   5  -1    1.68    0.70
 -17  -5   1    2.11    1.03
  16   5  -1    0.81    0.54
 -16  -5   1    0.44    0.90
  15   5  -1   -0.30    0.49
 -15  -5   1    0.55    0.80
  14   5  -1    2.19    0.82
  14   5  -1    3.63    0.71
 -14  -5   1    2.54    0.91
  13   5  -1    6.99    1.35
  13   5  -1   11.51    1.21
 -13  -5   1    8.15    1.47
  12   5  -1   -0.02    0.38
  12   5  -1   -0.08    0.41
 -12  -5   1   -0.15    0.45
  11   5  -1   -0.12    0.41
  11   5  -1    0.40    0.45
 -11  -5   1    0.03    0.11
 -11  -5   1    0.64    0.51
  10   5  -1    1.09    0.50
  10   5  -1    1.24    0.49
 -10  -5   1    2.11    0.64
 -10  -5   1    0.97    0.20
   9   5  -1    6.48    0.95
   9   5  -1    6.02    0.99
  -9  -5   1    5.73    0.51
  -9  -5   1    7.12    0.50
  -9  -5   1    7.07    1.08
   8   5  -1   -0.06    0.31
   8   5  -1   -0.17    0.25
  -8  -5   1    0.27    0.33
  -8  -5   1    0.11    0.08
  -8  -5   1    0.28    0.05
   7   5  -1    1.50    0.46
   7   5  -1    1.08    0.46
  -7  -5   1    0.94    0.15
  -7  -5   1    0.93    0.14
  -7  -5   1    1.34    0.42
   6   5  -1   24.47    2.25
   6   5  -1   28.43    2.41
  -6  -5   1   25.96    1.81
  -6  -5   1   26.48    1.80
  -6  -5   1   27.28    2.45
   5   5  -1   -0.16    0.19
   5   5  -1    0.12    0.07
   5   5  -1    0.14    0.23
  -5  -5   1    0.22    0.19
  -5  -5   1    0.05    0.04
   4   5  -1   -0.14    0.14
   4   5  -1    0.23    0.21
   4   5  -1    0.23    0.07
   4   5  -1    0.06    0.15
  -4  -5   1    0.42    0.20
  -4  -5   1    0.26    0.07
   3   5  -1    1.80    0.18
   3   5  -1    2.16    0.41
   3   5  -1    1.45    0.29
  -3  -5   1    2.06    0.18
  -3  -5   1    1.66    0.34
  -3  -5   1    2.32    0.50
   2   5  -1    0.19    0.08
   2   5  -1    0.11    0.14
   2   5  -1    0.05    0.07
   2   5  -1    0.26    0.18
  -2  -5   1    0.20    0.19
  -2  -5   1    0.16    0.13
  -2  -5   1    0.36    0.29
  -2  -5   1    0.16    0.07
   1   5  -1   65.10    4.30
   1   5  -1   58.58    4.90
   1   5  -1   7.85    5.40
   1   5  -1   72.50    5.25
  -1  -5   1   63.67    5.39
  -1  -5   1   62.57    4.28
  -1  -5   1   55.40    4.89
   0   5  -1   19.40    1.26
   0   5  -1   16.65    1.51
   0   5  -1   16.30    1.58
   0   5  -1   18.42    1.53
   0  -5   1   18.46    1.24
   0  -5   1   17.63    1.55
   0  -5   1   18.24    1.59
   0  -5   1   15.37    1.53
  -1   5  -1    1.88    0.34
  -1   5  -1    1.92    0.28
  -1   5  -1    1.89    0.25
  -1   5  -1    1.58    0.31
   1  -5   1    1.71    0.32
   1  -5   1    1.50    0.17
   1  -5   1    1.82    0.31
   1  -5   1    1.67    0.36
  -2   5  -1    1.51    0.23
  -2   5  -1    1.03    0.26
  -2   5  -1    1.12    0.18
   2  -5   1    1.05    0.21
   2  -5   1    2.19    0.37
   2  -5   1    1.04    0.26
  -3   5  -1    2.66    0.33
  -3   5  -1    2.18    0.22
   3  -5   1    2.07    0.29
   3  -5   1    2.94    0.41
   3  -5   1    1.76    0.39
  -4   5  -1   63.75    4.47
   4  -5   1   62.42    4.93
   4  -5   1   70.47    5.65
  -5   5  -1   13.60    1.13
   5  -5   1   16.08    1.27
   5  -5   1   13.40    1.49
  -6   5  -1    2.34    0.38
   6  -5   1    2.98    0.64
   6  -5   1    2.14    0.41
  -7   5  -1    0.78    0.26
   7  -5   1    1.11    0.45
   7  -5   1    1.16    0.33
  -8   5  -1    1.34    0.64
  -8   5  -1    2.16    0.39
   8  -5   1    2.56    0.50
  -9   5  -1    0.26    0.21
  -9   5  -1   -0.64    0.47
   9  -5   1    0.02    0.27
 -10   5  -1    0.09    0.24
 -10   5  -1   -0.44    0.47
  10  -5   1   -0.17    0.27
 -11   5  -1    9.71    1.64
 -11   5  -1   10.30    0.97
  11  -5   1    9.81    1.18
 -12   5  -1    0.05    0.25
 -12   5  -1    0.29    0.77
  12  -5   1    0.32    0.46
 -13   5  -1    0.19    0.77
 -13   5  -1    0.13    0.26
  13  -5   1    0.22    0.41
 -14   5  -1   -0.65    0.72
 -14   5  -1    0.19    0.22
  14  -5   1   -0.08    0.44
 -15   5  -1    2.61    0.48
 -15   5  -1    4.80    1.33
  15  -5   1    1.96    0.73
 -16   5  -1   -0.27    0.24
 -16   5  -1    0.70    0.94
  16  -5   1    0.35    0.54
  17   4  -1    1.64    0.75
 -17  -4   1    2.80    1.20
  16   4  -1    0.72    0.59
 -16  -4   1    3.05    1.14
  15   4  -1   -0.23    0.54
 -15  -4   1    0.16    0.77
  14   4  -1    0.22    0.55
 -14  -4   1    1.73    0.82
  13   4  -1   -0.31    0.32
  13   4  -1   -0.88    0.43
 -13  -4   1    0.29    0.61
  12   4  -1    1.74    0.67
  12   4  -1    1.51    0.51
 -12  -4   1    1.58    0.65
 -12  -4   1    0.95    0.21
  11   4  -1    1.49    0.51
  11   4  -1    1.49    0.63
 -11  -4   1    1.10    0.22
 -11  -4   1    1.35    0.60
  10   4  -1    0.00    0.31
  10   4  -1   -0.15    0.28
 -10  -4   1   -0.03    0.10
 -10  -4   1    0.29    0.38
   9   4  -1   15.48    1.54
   9   4  -1   17.26    1.58
  -9  -4   1   14.31    1.10
  -9  -4   1   15.14    1.68
   8   4  -1    0.15    0.32
   8   4  -1    0.24    0.31
  -8  -4   1    0.10    0.10
  -8  -4   1    0.10    0.04
  -8  -4   1   -0.05    0.26
   7   4  -1    1.39    0.50
   7   4  -1    1.66    0.48
  -7  -4   1    2.02    0.21
  -7  -4   1    2.02    0.20
  -7  -4   1    1.80    0.51
   6   4  -1    8.91    0.96
   6   4  -1    9.11    1.00
  -6  -4   1    8.10    0.63
  -6  -4   1   10.04    1.02
  -6  -4   1    8.81    0.64
   5   4  -1    0.50    0.26
   5   4  -1    0.64    0.29
  -5  -4   1    0.42    0.21
  -5  -4   1    0.59    0.09
  -5  -4   1    0.67    0.09
   4   4  -1   10.21    0.99
   4   4  -1    8.91    0.66
   4   4  -1    9.13    0.93
   4   4  -1   10.27    0.97
  -4  -4   1    9.97    0.97
  -4  -4   1    9.29    0.67
   3   4  -1   98.97    6.26
   3   4  -1   96.79    7.67
   3   4  -1  101.94    7.89
   3   4  -1   89.11    7.06
  -3  -4   1   96.93    7.89
  -3  -4   1   95.24    7.05
  -3  -4   1   93.49    6.25
  -3  -4   1   80.19    7.64
   2   4  -1    8.28    0.85
   2   4  -1    8.78    0.81
   2   4  -1    8.44    0.60
  -2  -4   1    7.79    0.59
  -2  -4   1    7.61    0.82
  -2  -4   1    8.79    0.88
  -2  -4   1    8.87    0.84
   1   4  -1   11.74    1.05
   1   4  -1   11.27    0.80
   1   4  -1   11.83    1.05
   1   4  -1   11.52    1.06
  -1  -4   1   10.44    1.04
  -1  -4   1   11.32    1.05
  -1  -4   1   11.05    0.79
   0   4  -1   19.27    1.76
   0   4  -1   20.01    1.70
   0   4  -1   20.93    1.39
   0   4  -1   17.94    1.64
   0  -4   1   20.37    1.38
   0  -4   1   19.13    1.66
   0  -4   1   19.54    1.70
   0  -4   1   21.37    1.77
  -1   4  -1    1.48    0.21
  -1   4  -1    1.33    0.27
  -1   4  -1    1.20    0.28
  -1   4  -1    1.45    0.23
   1  -4   1    1.09    0.16
   1  -4   1    1.28    0.24
   1  -4   1    1.33    0.29
   1  -4   1    1.20    0.26
  -2   4  -1   63.16    4.07
  -2   4  -1   61.57    4.82
  -2   4  -1   58.85    5.10
  -2   4  -1   58.12    4.53
   2  -4   1   65.04    5.11
   2  -4   1   64.45    4.53
   2  -4   1   56.84    4.04
   2  -4   1   53.81    4.83
  -3   4  -1    0.60    0.14
  -3   4  -1    0.63    0.18
   3  -4   1    0.34    0.15
   3  -4   1    0.68    0.23
  -4   4  -1    8.19    0.70
   4  -4   1    8.45    0.95
   4  -4   1    9.27    0.80
  -5   4  -1    7.03    0.65
   5  -4   1    7.04    0.91
   5  -4   1    8.34    0.75
  -6   4  -1   13.51    1.10
   6  -4   1   14.81    1.53
   6  -4   1   14.11    1.24
  -7   4  -1    8.20    0.76
   7  -4   1    8.92    0.88
  -8   4  -1   35.44    2.55
  -8   4  -1   34.57    3.40
   8  -4   1   36.18    2.87
  -9   4  -1    1.82    0.70
  -9   4  -1    2.07    0.40
   9  -4   1    2.77    0.54
 -10   4  -1    1.21    0.68
 -10   4  -1    1.08    0.33
  10  -4   1    1.05    0.43
 -11   4  -1    1.03    0.33
 -11   4  -1    1.61    0.69
  11  -4   1    0.49    0.43
 -12   4  -1    1.63    0.88
 -12   4  -1    0.76    0.32
  12  -4   1    0.91    0.52
 -13   4  -1   -0.65    0.21
 -13   4  -1   -0.04    0.69
  13  -4   1   -0.02    0.40
 -14   4  -1    0.92    0.88
 -14   4  -1   -0.05    0.24
  14  -4   1    0.85    0.55
 -15   4  -1   -0.02    0.23
 -15   4  -1    1.03    0.79
  15  -4   1    0.29    0.49
 -16   4  -1    0.04    0.22
 -16   4  -1   -0.30    0.93
  16  -4   1   -0.34    0.45
  17   3  -1    0.71    0.51
 -17  -3   1    1.29    0.94
  16   3  -1    0.90    0.61
 -16  -3   1    1.43    0.97
  15   3  -1   -0.17    0.51
 -15  -3   1    0.77    0.81
  14   3  -1    0.28    0.56
 -14  -3   1    0.67    0.76
  13   3  -1   -0.54    0.46
  13   3  -1   -0.30    0.29
 -13  -3   1    0.40    0.52
 -13  -3   1   -0.07    0.08
  12   3  -1    2.66    0.78
  12   3  -1    3.29    0.65
 -12  -3   1    3.09    0.86
 -12  -3   1    3.47    0.37
  11   3  -1    0.98    0.53
  11   3  -1    1.02    0.45
 -11  -3   1    2.01    0.67
 -11  -3   1    1.22    0.24
  10   3  -1    1.64    0.46
  10   3  -1    1.11    0.49
 -10  -3   1    1.55    0.59
 -10  -3   1    1.28    0.23
   9   3  -1    3.38    0.62
   9   3  -1    2.66    0.64
  -9  -3   1    2.59    0.32
  -9  -3   1    3.22    0.74
   8   3  -1    0.23    0.30
   8   3  -1    0.32    0.31
  -8  -3   1    0.35    0.35
  -8  -3   1    0.27    0.13
   7   3  -1    1.25    0.45
   7   3  -1    1.87    0.46
  -7  -3   1    1.39    0.19
  -7  -3   1    1.78    0.51
   6   3  -1    0.72    0.31
   6   3  -1    0.69    0.31
  -6  -3   1    0.61    0.11
  -6  -3   1    0.39    0.29
  -6  -3   1    0.66    0.11
   5   3  -1   72.13    5.95
   5   3  -1   74.22    5.51
  -5  -3   1   62.01    5.95
  -5  -3   1   78.44    4.83
  -5  -3   1   70.71    6.15
  -5  -3   1   74.28    4.82
   4   3  -1   10.01    0.98
   4   3  -1    9.82    0.92
   4   3  -1    9.73    0.98
  -4  -3   1    9.80    0.68
  -4  -3   1    9.40    0.67
  -4  -3   1    8.73    0.94
  -4  -3   1   10.77    0.99
   3   3  -1    8.15    0.60
   3   3  -1    8.93    0.83
   3   3  -1    9.53    0.86
   3   3  -1    9.43    0.90
  -3  -3   1    7.75    0.86
  -3  -3   1    9.30    0.81
  -3  -3   1    8.24    0.60
  -3  -3   1    8.99    0.86
   2   3  -1  101.95    8.15
   2   3  -1  105.57    6.68
   2   3  -1  108.57    8.39
  -2  -3   1   98.88    7.47
  -2  -3   1   98.95    6.68
  -2  -3   1  104.58    8.40
  -2  -3   1   86.50    8.13
   1   3  -1    4.97    0.53
   1   3  -1    5.63    0.56
  1   3  -1    5.13    0.55
   1   3  -1    5.22    0.39
  -1  -3   1    5.52    0.38
  -1  -3   1    5.33    0.57
  -1  -3   1    4.86    0.53
  -1  -3   1    5.40    0.54
   0   3  -1    5.66    0.40
   0   3  -1    4.94    0.54
   0   3  -1    5.19    0.53
   0   3  -1    5.13    0.52
   0  -3   1    5.32    0.54
   0  -3   1    5.53    0.55
   0  -3   1    4.46    0.51
   0  -3   1    5.58    0.39
  -1   3  -1   24.34    1.54
  -1   3  -1   24.44    1.83
  -1   3  -1   18.50    1.73
  -1   3  -1   22.67    1.94
   1  -3   1   20.35    1.83
   1  -3   1   21.58    1.52
   1  -3   1   24.49    1.95
   1  -3   1   20.45    1.73
  -2   3  -1   15.24    1.04
  -2   3  -1   14.71    1.34
  -2   3  -1   15.07    1.18
  -2   3  -1   13.48    1.18
   2  -3   1   14.22    1.03
   2  -3   1   15.92    1.35
   2  -3   1   12.70    1.20
   2  -3   1   14.89    1.17
  -3   3  -1    6.75    0.74
  -3   3  -1    7.79    0.64
  -3   3  -1    6.94    0.56
   3  -3   1    6.88    0.76
   3  -3   1    6.02    0.53
   3  -3   1    7.61    0.64
  -4   3  -1   12.93    0.96
   4  -3   1   11.56    1.26
   4  -3   1   13.72    1.08
  -5   3  -1    5.20    0.49
   5  -3   1    5.52    0.72
   5  -3   1    5.30    0.56
  -6   3  -1    0.71    0.21
   6  -3   1    1.46    0.45
   6  -3   1    0.60    0.24
  -7   3  -1    2.23    0.37
   7  -3   1    2.47    0.47
  -8   3  -1    0.44    0.49
  -8   3  -1    1.08    0.26
   8  -3   1    0.75    0.34
  -9   3  -1   13.48    1.07
  -9   3  -1   11.20    1.57
   9  -3   1   13.09    1.27
 -10   3  -1    0.13    0.52
 -10   3  -1    0.31    0.22
  10  -3   1   -0.05    0.27
 -11   3  -1   -0.56    0.16
 -11   3  -1    0.94    0.57
  11  -3   1   -0.46    0.34
 -12   3  -1    0.15    0.26
 -12   3  -1    0.92    0.75
  12  -3   1   -0.18    0.37
 -13   3  -1    1.85    0.98
 -13   3  -1    0.45    0.35
  13  -3   1    0.68    0.53
 -14   3  -1    3.32    1.20
 -14   3  -1    3.39    0.58
  14  -3   1    2.71    0.75
 -15   3  -1    0.10    0.83
 -15   3  -1   -0.27    0.19
  15  -3   1    0.01    0.42
 -16   3  -1    2.74    1.21
  16  -3   1    1.26    0.65
  17   2  -1    0.48    0.57
 -17  -2   1    0.63    0.78
 -16  -2   1    1.93    1.05
  15   2  -1    0.34    0.56
 -15  -2   1    1.47    0.98
  14   2  -1   -0.13    0.50
 -14  -2   1    0.21    0.69
  13   2  -1   -0.42    0.45
  13   2  -1    0.66    0.32
 -13  -2   1   -0.28    0.48
 -13  -2   1    0.25    0.16
  12   2  -1    0.15    0.36
  12   2  -1    0.33    0.47
 -12  -2   1    0.86    0.64
 -12  -2   1    0.80    0.19
  11   2  -1    5.01    0.80
  11   2  -1    5.59    0.98
 -11  -2   1    5.43    0.51
 -11  -2   1    4.79    1.07
  10   2  -1   10.61    1.08
  10   2  -1    9.88    1.14
 -10  -2   1    8.81    0.76
 -10  -2   1    9.66    1.31
   9   2  -1    2.49    0.51
   9   2  -1    2.60    0.60
  -9  -2   1    2.36    0.31
  -9  -2   1    2.05    0.60
   8   2  -1   10.40    1.04
   8   2  -1    8.50    0.99
  -8  -2   1    7.42    1.08
  -8  -2   1    9.02    0.69
   7   2  -1   13.74    1.27
   7   2  -1   13.41    1.32
   7   2  -1   13.02    0.94
  -7  -2   1   12.84    1.46
  -7  -2   1   12.34    0.94
   6   2  -1    0.11    0.21
   6   2  -1    0.25    0.25
   6   2  -1    0.10    0.07
  -6  -2   1    0.02    0.07
  -6  -2   1    0.15    0.25
  -6  -2   1    0.18    0.10
   5   2  -1    0.08    0.06
   5   2  -1    0.24    0.21
   5   2  -1    0.45    0.20
  -5  -2   1    0.19    0.09
  -5  -2   1    0.20    0.19
  -5  -2   1    0.07    0.06
   4   2  -1    1.84    0.37
   4   2  -1    2.82    0.43
   4   2  -1    1.94    0.17
   4   2  -1    1.37    0.35
  -4  -2   1    2.89    0.46
  -4  -2   1    1.68    0.36
  -4  -2   1    2.10    0.17
   3   2  -1    0.17    0.15
   3   2  -1    0.22    0.22
   3   2  -1   -0.03    0.04
  -3  -2   1    0.26    0.19
  -3  -2   1    0.35    0.17
  -3  -2   1    0.04    0.04
  -3  -2   1    0.11    0.10
  -3  -2   1    0.13    0.04
   2   2  -1   19.39    1.82
   2   2  -1   23.49    1.86
   2   2  -1   21.77    1.69
  -2  -2   1   19.20    1.82
  -2  -2   1   22.57    1.86
   1   2  -1    6.73    0.68
   1   2  -1    7.13    0.50
   1   2  -1    8.21    0.67
   1   2  -1    7.87    0.69
  -1  -2   1    8.74    0.68
  -1  -2   1    7.03    0.50
  -1  -2   1    7.51    0.68
  -1  -2   1    6.36    0.67
   0   2  -1   10.68    0.91
   0   2  -1   11.55    0.99
   0   2  -1   12.39    0.76
   0   2  -1    9.96    0.94
   0  -2   1   10.01    0.98
   0  -2   1   10.82    0.95
   0  -2   1   11.39    0.76
  -1   2  -1  152.29    9.45
  -1   2  -1  139.57   11.34
  -1   2  -1  136.02   10.44
  -1   2  -1  143.32   11.79
   1  -2   1  151.92   11.80
   1  -2   1  145.12    9.45
   1  -2   1  126.24   11.35
   1  -2   1  145.14   10.44
  -2   2  -1    1.95    0.28
  -2   2  -1    3.33    0.36
  -2   2  -1    2.60    0.23
   2  -2   1    1.71    0.26
   2  -2   1    2.11    0.21
   2  -2   1    3.32    0.37
  -3   2  -1   16.54    1.35
  -3   2  -1   16.38    1.21
   3  -2   1   18.64    1.60
   3  -2   1   17.53    1.35
  -4   2  -1    2.64    0.28
   4  -2   1    2.91    0.33
   4  -2   1    3.15    0.51
  -5   2  -1    0.06    0.09
   5  -2   1   -0.06    0.15
   5  -2   1   -0.13    0.09
  -6   2  -1    9.23    0.76
   6  -2   1    8.92    1.09
   6  -2   1    9.70    0.90
  -7   2  -1    0.67    0.49
  -7   2  -1    0.78    0.23
   7  -2   1    0.96    0.33
  -8   2  -1   15.07    1.10
  -8   2  -1   13.96    1.61
   8  -2   1   11.89    1.26
  -9   2  -1    0.94    0.24
  -9   2  -1    1.11    0.59
   9  -2   1    0.49    0.35
 -10   2  -1    3.41    0.83
 -10   2  -1    3.40    0.49
  10  -2   1    3.60    0.70
 -11   2  -1    5.05    0.63
 -11   2  -1    3.74    0.99
  11  -2   1    4.52    0.85
 -12   2  -1    0.79    0.33
 -12   2  -1    0.47    0.70
  12  -2   1    0.38    0.50
 -13   2  -1    5.15    1.29
 -13   2  -1    4.06    0.60
  13  -2   1    4.32    0.94
 -14   2  -1    0.54    0.85
 -14   2  -1    0.20    0.22
  14  -2   1    0.11    0.45
 -15   2  -1    0.64    0.88
 -15   2  -1    0.71    0.25
  15  -2   1    0.56    0.59
 -16   2  -1    0.99    0.89
  16  -2   1    0.34    0.63
  17   1  -1   -0.26    0.52
 -17  -1   1    0.68    0.80
  16   1  -1    0.43    0.52
 -16  -1   1    0.73    0.85
  15   1  -1    0.76    0.61
 -15  -1   1    1.03    0.94
  14   1  -1    0.33    0.57
 -14  -1   1   -0.03    0.74
  13   1  -1    1.74    0.72
 -13  -1   1    2.68    0.37
 -13  -1   1    2.33    0.90
  12   1  -1   -0.39    0.37
  12   1  -1    0.03    0.27
 -12  -1   1   -0.05    0.11
 -12  -1   1    0.00    0.55
  11   1  -1    7.13    1.13
  11   1  -1    6.88    0.86
 -11  -1   1    5.25    1.15
 -11  -1   1    7.75    0.65
  10   1  -1    0.37    0.41
  10   1  -1    0.56    0.33
 -10  -1   1    0.69    0.20
 -10  -1   1    0.19    0.39
   9   1  -1    5.26    0.73
   9   1  -1    4.63    0.80
  -9  -1   1    4.69    0.45
  -9  -1   1    4.00    0.84
   8   1  -1    0.54    0.32
   8   1  -1    0.79    0.36
  -8  -1   1    0.44    0.35
  -8  -1   1    0.72    0.18
   7   1  -1   15.43    1.35
   7   1  -1   14.38    1.40
  -7  -1   1   14.36    1.05
  -7  -1   1   12.94    1.33
  -7  -1   1   14.48    1.54
   6   1  -1    6.23    0.67
   6   1  -1    5.22    0.69
   6   1  -1    5.99    0.46
  -6  -1   1    5.15    0.82
  -6  -1   1    5.82    0.64
  -6  -1   1    5.46    0.47
   5   1  -1    6.13    0.64
   5   1  -1    5.15    0.68
   5   1  -1    6.25    0.46
  -5  -1   1    4.90    0.63
  -5  -1   1    5.99    0.72
  -5  -1   1    6.29    0.46
   4   1  -1    6.96    0.72
   4   1  -1    7.43    0.77
   4   1  -1    7.31    0.65
   4   1  -1    5.98    0.48
  -4  -1   1    5.54    0.48
  -4  -1   1    7.13    0.74
  -4  -1   1    7.81    0.62
  -4  -1   1    6.87    0.72
   3   1  -1    5.63    0.70
   3   1  -1    6.59    0.69
   3   1  -1    6.42    0.61
   3   1  -1    7.07    0.48
  -3  -1   1    6.56    0.70
  -3  -1   1    6.56    0.48
  -3  -1   1    7.51    0.61
  -3  -1   1    5.88    0.70
   2   1  -1  128.79   12.28
   2   1  -1  157.55   10.90
   2   1  -1  150.64    9.82
   2   1  -1  137.53   11.89
  -2  -1   1  168.45   10.90
  -2  -1   1  141.31   11.90
  -2  -1   1  160.59   12.30
  -2  -1   1  143.52    9.82
  -2   1  -1   10.38    0.85
  -2   1  -1   10.60    0.77
   2  -1   1   11.27    0.86
   2  -1   1   11.52    1.02
  -3   1  -1    1.22    0.27
  -3   1  -1    1.39    0.21
  -3   1  -1    1.36    0.18
   3  -1   1    1.56    0.23
   3  -1   1    1.52    0.31
   3  -1   1    1.42    0.17
  -4   1  -1    6.60    0.56
  -4   1  -1    6.17    0.50
   4  -1   1    6.49    0.59
   4  -1   1    6.22    0.49
   4  -1   1    5.79    0.70
  -5   1  -1   20.49    1.87
  -5   1  -1   22.84    1.58
   5  -1   1   21.90    1.82
   5  -1   1   24.89    1.81
   5  -1   1   22.91    2.09
  -6   1  -1    1.12    0.26
  -6   1  -1    1.03    0.21
   6  -1   1    1.06    0.18
   6  -1   1    1.42    0.33
  -7   1  -1   15.61    1.11
  -7   1  -1   14.20    1.35
  -7   1  -1   12.65    1.58
   7  -1   1   13.43    1.22
   7  -1   1   16.69    1.35
  -8   1  -1    4.07    0.57
  -8   1  -1    4.62    0.45
  -8   1  -1    2.72    0.74
   8  -1   1    3.32    0.40
   8  -1   1    3.98    0.65
  -9   1  -1   16.86    1.91
  -9   1  -1   17.97    1.28
  -9   1  -1   16.97    1.52
   9  -1   1   15.72    1.41
   9  -1   1   15.70    1.54
 -10   1  -1    0.90    0.44
 -10   1  -1    0.11    0.15
  10  -1   1    0.41    0.15
  10  -1   1    0.26    0.32
 -11   1  -1    4.45    1.08
 -11   1  -1    4.69    0.59
  11  -1   1    5.00    0.49
  11  -1   1    5.02    0.88
 -12   1  -1   -0.11    0.16
 -12   1  -1   -0.69    0.61
  12  -1   1   -0.53    0.34
 -13   1  -1   -0.33    0.17
 -13   1  -1    0.22    0.82
  13  -1   1   -0.40    0.48
 -14   1  -1    0.41    0.98
 -14   1  -1   -0.10    0.17
  14  -1   1    0.72    0.52
 -15   1  -1    8.54    0.74
 -15   1  -1    6.44    1.55
  15  -1   1    6.14    1.23
 -16   1  -1    0.42    1.01
  16  -1   1   -0.66    0.45
 -17   1  -1    0.88    1.13
  17  -1   1    0.70    0.63
  17   0  -1   -0.24    0.56
 -17   0   1   -0.58    0.85
  16   0  -1    0.23    0.53
 -16   0   1    1.90    1.02
  15   0  -1    1.00    0.68
 -15   0   1    2.66    1.05
  14   0  -1    2.15    0.76
 -14   0   1    1.95    0.31
 -14   0   1    1.25    1.10
  13   0  -1    0.30    0.58
 -13   0   1    0.48    0.80
 -13   0   1   -0.19    0.12
  12   0  -1    2.03    0.38
  12   0  -1    1.90    0.66
 -12   0   1    2.08    0.33
 -12   0   1    2.06    0.89
  11   0  -1    3.14    0.72
  11   0  -1    3.07    0.54
 -11   0   1    4.08    0.99
 -11   0   1    2.85    0.41
  10   0  -1    0.13    0.34
  10   0  -1    0.14    0.23
 -10   0   1    0.32    0.42
 -10   0   1    0.25    0.16
   9   0  -1    4.98    0.73
   9   0  -1    5.05    0.82
  -9   0   1    5.19    1.01
  -9   0   1    6.01    0.52
   8   0  -1   16.69    1.47
   8   0  -1   14.84    1.46
  -8   0   1   14.37    1.67
  -8   0   1   15.38    1.16
  -8   0   1   16.33    1.46
   7   0  -1    9.73    1.01
   7   0  -1    9.76    1.00
  -7   0   1    9.92    0.76
  -7   0   1   10.29    1.02
  -7   0   1    7.71    1.14
   6   0  -1    1.02    0.34
   6   0  -1    1.61    0.38
   6   0  -1    1.58    0.20
  -6   0   1    1.52    0.22
  -6   0   1    0.79    0.37
  -6   0   1    1.32    0.34
   5   0  -1   58.62    5.21
   5   0  -1   64.90    4.28
   5   0  -1   69.89    4.83
  -5   0   1   60.35    5.25
  -5   0   1   66.43    5.48
  -5   0   1   62.80    4.28
   4   0  -1    0.88    0.21
   4   0  -1    1.14    0.28
   4   0  -1    0.69    0.12
  -4   0   1    1.38    0.31
  -4   0   1    0.93    0.25
  -4   0   1    0.85    0.13
   3   0  -1    2.72    0.30
   3   0  -1    2.26    0.20
   3   0  -1    1.86    0.36
   3   0  -1    2.36    0.38
  -3   0   1    1.95    0.35
  -3   0   1    2.07    0.20
  -3   0   1    2.50    0.27
  -3   0   1    2.54    0.40
   2   0  -1   22.46    1.68
   2   0  -1   20.28    1.86
   2   0  -1   22.49    1.91
   2   0  -1   20.75    1.48
  -2   0   1   24.35    1.92
  -2   0   1   23.44    1.68
  -2   0   1   20.82    1.49
  -2   0   1   22.16    1.87
  -1   0   1    6.21    0.43
   0   0  -1    0.00    0.01
   0   0   1    0.00    0.00
   0   0   1    0.00    0.01
  -2   0  -1  130.81   10.80
  -2   0  -1  129.73    9.01
  -2   0  -1  133.13   11.26
  -2   0  -1  143.38    9.94
   2   0   1  131.64    9.01
   2   0   1  134.66   10.80
   2   0   1  143.16    9.94
   2   0   1  141.06   11.27
  -3   0  -1    7.36    0.53
  -3   0  -1    6.51    0.72
  -3   0  -1    5.97    0.62
  -3   0  -1    8.09    0.61
   3   0   1    8.40    0.63
   3   0   1    7.10    0.52
   3   0   1    6.66    0.60
   3   0   1    7.12    0.74
  -4   0  -1    1.84    0.21
  -4   0  -1    2.50    0.31
  -4   0  -1    2.02    0.23
  -4   0  -1    1.94    0.28
   4   0   1    1.86    0.20
   4   0   1    1.85    0.30
   4   0   1    1.85    0.37
   4   0   1    1.97    0.23
  -5   0  -1   15.74    1.41
  -5   0  -1   16.23    1.16
   5   0   1   16.18    1.36
   5   0   1   15.94    1.15
   5   0   1   17.08    1.36
  -6   0  -1   17.88    1.30
  -6   0  -1   16.53    1.59
  -6   0  -1   19.95    1.82
   6   0   1   18.29    1.53
   6   0   1   18.13    1.52
  -7   0  -1    9.99    0.79
  -7   0  -1    9.98    1.21
  -7   0  -1    9.06    0.99
   7   0   1    9.41    0.89
   7   0   1   10.66    1.00
  -8   0  -1    0.50    0.19
  -8   0  -1    0.31    0.40
  -8   0  -1    0.71    0.21
   8   0   1    0.53    0.20
   8   0   1    0.70    0.36
  -9   0  -1    1.09    0.26
  -9   0  -1    1.12    0.24
  -9   0  -1    0.91    0.60
   9   0   1    1.53    0.28
   9   0   1    1.56    0.46
 -10   0  -1    0.17    0.15
 -10   0  -1   -0.19    0.37
  10   0   1    0.08    0.32
  10   0   1    0.02    0.14
 -11   0  -1    0.35    0.59
 -11   0  -1    0.92    0.25
  11   0   1    0.78    0.45
  11   0   1    0.47    0.22
 -12   0  -1    7.04    1.41
 -12   0  -1    9.41    0.81
  12   0   1    9.79    1.35
 -13   0  -1    1.54    0.89
 -13   0  -1    1.79    0.35
  13   0   1    2.06    0.73
 -14   0  -1    0.80    0.86
 -14   0  -1    0.97    0.25
  14   0   1    1.08    0.63
 -15   0  -1    0.84    0.91
 -15   0  -1    0.14    0.13
  15   0   1   -0.58    0.42
 -16   0  -1    1.66    1.00
  16   0   1   -0.04    0.48
 -17   0  -1   -0.44    0.97
  17   0   1    0.20    0.48
  17  -1  -1   -0.78    0.53
 -17   1   1   -0.25    0.92
  16  -1  -1    0.08    0.49
 -16   1   1    1.31    0.91
  15  -1  -1    0.22    0.52
 -15   1   1   -1.27    0.88
  14  -1  -1    1.03    0.64
 -14   1   1    1.72    0.96
 -14   1   1    1.03    0.23
  13  -1  -1    3.52    0.89
 -13   1   1    3.38    0.49
 -13   1   1    4.56    1.22
  12  -1  -1    4.17    0.86
 -12   1   1    5.08    0.52
 -12   1   1    2.97    1.04
  11  -1  -1    1.97    0.41
  11  -1  -1    2.85    0.70
 -11   1   1    1.36    0.73
 -11   1   1    2.34    0.37
  10  -1  -1   -0.22    0.23
  10  -1  -1    0.34    0.35
 -10   1   1   -0.11    0.45
 -10   1   1   -0.12    0.15
   9  -1  -1    0.58    0.36
   9  -1  -1    1.00    0.32
  -9   1   1    1.12    0.24
  -9   1   1    1.39    0.55
   8  -1  -1    3.64    0.56
   8  -1  -1    3.24    0.60
  -8   1   1    5.34    0.53
  -8   1   1    2.40    0.71
  -8   1   1    3.74    0.45
   7  -1  -1    0.12    0.25
   7  -1  -1   -0.09    0.26
  -7   1   1   -0.04    0.36
  -7   1   1    0.34    0.24
  -7   1   1    0.02    0.14
   6  -1  -1    2.37    0.42
   6  -1  -1    1.95    0.39
  -6   1   1    1.78    0.26
  -6   1   1    1.00    0.45
  -6   1   1    2.74    0.47
   5  -1  -1    1.17    0.27
   5  -1  -1    0.94    0.28
   5  -1  -1    1.03    0.15
  -5   1   1    1.24    0.30
  -5   1   1    0.72    0.33
  -5   1   1    1.17    0.19
   4  -1  -1   14.94    1.14
   4  -1  -1   18.36    1.34
   4  -1  -1   14.78    1.43
  -4   1   1   16.09    1.15
  -4   1   1   16.85    1.55
  -4   1   1   17.63    1.46
   3  -1  -1    5.49    0.60
   3  -1  -1    4.88    0.57
   3  -1  -1    5.31    0.48
   3  -1  -1    5.08    0.40
  -3   1   1    5.42    0.48
  -3   1   1    4.74    0.59
  -3   1   1    5.26    0.57
  -3   1   1    5.15    0.41
   2  -1  -1    0.11    0.08
   2  -1  -1    0.25    0.12
   2  -1  -1    0.13    0.14
   2  -1  -1    0.19    0.07
  -2   1   1    0.10    0.11
  -2   1   1    0.21    0.13
  -2   1   1    0.20    0.09
  -2   1   1    0.17    0.07
   1  -1  -1  942.28   77.14
   1  -1  -1  924.41   74.41
   1  -1  -1  878.71   61.94
  -1   1   1 1000.00   74.42
   0  -1  -1    9.77    0.77
   0   1   1   13.16    0.86
  -2  -1  -1   38.27    2.59
  -2  -1  -1   40.47    2.89
  -2  -1  -1   38.06    3.11
  -2  -1  -1   37.42    2.59
   2   1   1   41.38    3.28
   2   1   1   37.64    2.89
   2   1   1   38.03    3.11
  -3  -1  -1    6.70    0.55
  -3  -1  -1    6.11    0.64
  -3  -1  -1    6.62    0.46
  -3  -1  -1    5.65    0.56
   3   1   1    6.00    0.55
   3   1   1    6.02    0.46
   3   1   1    6.14    0.65
   3   1   1    6.33    0.57
  -4  -1  -1    5.71    0.59
  -4  -1  -1    4.84    0.52
  -4  -1  -1    5.27    0.42
  -4  -1  -1    5.58    0.49
   4   1   1    5.14    0.53
   4   1   1    5.21    0.50
   4   1   1    5.29    0.41
  -5  -1  -1    7.30    0.82
  -5  -1  -1    6.89    0.53
  -5  -1  -1    6.12    0.67
   5   1   1    6.68    0.64
   5   1   1    6.76    0.53
   5   1   1    7.60    0.70
  -6  -1  -1    0.43    0.12
  -6  -1  -1   -0.06    0.13
  -6  -1  -1    0.32    0.30
   6   1   1    0.18    0.14
   6   1   1    1.25    0.30
  -7  -1  -1    2.75    0.66
  -7  -1  -1    2.69    0.34
  -7  -1  -1    2.66    0.48
   7   1   1    3.48    0.58
   7   1   1    2.92    0.42
  -8  -1  -1    8.80    1.17
  -8  -1  -1    8.72    0.71
  -8  -1  -1    8.20    0.85
   8   1   1    8.34    0.84
   8   1   1   10.26    1.01
  -9  -1  -1    3.95    0.84
  -9  -1  -1    3.44    0.44
   9   1   1    4.01    0.50
   9   1   1    4.18    0.72
 -10  -1  -1   24.51    2.38
 -10  -1  -1   20.64    1.62
  10   1   1   21.15    2.02
  10   1   1   23.26    1.93
 -11  -1  -1    0.70    0.20
 -11  -1  -1    0.46    0.57
  11   1   1    1.14    0.52
  11   1   1    0.44    0.25
 -12  -1  -1    0.45    0.20
 -12  -1  -1    1.03    0.65
  12   1   1    1.59    0.65
  12   1   1    0.35    0.21
 -13  -1  -1    1.21    0.27
 -13  -1  -1    0.12    0.77
  13   1   1    1.16    0.62
 -14  -1  -1    1.22    0.85
 -14  -1  -1    1.70    0.31
  14   1   1    1.97    0.73
 -15  -1  -1    1.18    1.07
  15   1   1    0.90    0.69
 -16  -1  -1    1.58    1.04
  16   1   1    0.35    0.52
 -17  -1  -1    1.44    0.90
  17   1   1   -0.01    0.53
  16  -2  -1    0.96    0.60
 -16   2   1    0.96    0.89
  15  -2  -1    0.65    0.48
 -15   2   1    0.41    0.79
  14  -2  -1    2.18    0.75
 -14   2   1    1.21    1.10
 -14   2   1    1.77    0.36
  13  -2  -1    0.52    0.56
 -13   2   1    0.68    0.84
 -13   2   1    0.99    0.32
  12  -2  -1   -0.20    0.39
 -12   2   1    0.31    0.22
 -12   2   1    0.72    0.58
  11  -2  -1    0.35    0.17
  11  -2  -1   -0.45    0.37
 -11   2   1    0.32    0.57
 -11   2   1    0.16    0.16
  10  -2  -1    0.11    0.22
  10  -2  -1    0.27    0.33
 -10   2   1    0.39    0.21
 -10   2   1   -0.12    0.44
   9  -2  -1   10.06    1.19
   9  -2  -1   11.02    1.10
  -9   2   1   13.96    1.14
  -9   2   1   11.62    0.97
  -9   2   1   11.22    1.48
   8  -2  -1   23.90    2.10
   8  -2  -1   21.55    2.13
  -8   2   1   24.30    2.48
  -8   2   1   25.74    1.82
  -8   2   1   29.33    2.21
   7  -2  -1    0.99    0.32
   7  -2  -1    1.48    0.39
  -7   2   1    1.97    0.32
  -7   2   1    1.00    0.51
  -7   2   1    2.34    0.39
   6  -2  -1    7.98    0.88
   6  -2  -1    9.38    0.97
  -6   2   1   12.69    1.19
  -6   2   1    8.89    0.74
  -6   2   1    8.49    0.91
   5  -2  -1   20.63    1.63
  -5   2   1   16.62    1.88
  -5   2   1   23.10    1.74
  -5   2   1   19.01    1.43
   4  -2  -1   16.10    1.57
   4  -2  -1   21.29    1.49
   4  -2  -1   19.07    1.29
  -4   2   1   18.01    1.30
  -4   2   1   17.47    1.72
   3  -2  -1    1.72    0.30
   3  -2  -1    2.15    0.21
   3  -2  -1    1.44    0.25
  -3   2   1    2.60    0.40
  -3   2   1    2.27    0.35
  -3   2   1    2.24    0.25
  -3   2   1    1.89    0.23
  -3   2   1    1.79    0.23
   2  -2  -1   16.55    1.55
   2  -2  -1   20.01    1.45
   2  -2  -1   17.82    1.30
  -2   2   1   20.18    1.67
  -2   2   1   20.37    1.66
  -2   2   1   18.58    1.30
  -2   2   1   19.43    1.46
  -2   2   1   18.44    1.53
   1  -2  -1    4.29    0.41
   1  -2  -1    4.46    0.41
   1  -2  -1    5.30    0.46
  -1   2   1    4.85    0.46
  -1   2   1    5.11    0.36
  -1   2   1    4.67    0.40
  -1   2   1    4.63    0.41
  -1  -2  -1    6.96    0.60
  -1  -2  -1    6.91    0.49
  -1  -2  -1    6.69    0.59
   1   2   1    7.38    0.60
   1   2   1    6.40    0.49
  -2  -2  -1    1.22    0.12
  -2  -2  -1    1.14    0.19
  -2  -2  -1    1.41    0.19
  -2  -2  -1    1.28    0.21
   2   2   1    1.15    0.17
   2   2   1    1.33    0.13
   2   2   1    1.01    0.21
  -3  -2  -1   23.64    1.64
  -3  -2  -1   25.64    2.12
  -3  -2  -1   22.80    1.99
  -3  -2  -1   24.69    1.88
  -3  -2  -1   24.74    2.11
   3   2   1   23.63    1.99
   3   2   1   23.62    1.89
  -4  -2  -1    6.40    0.49
  -4  -2  -1    7.74    0.61
  -4  -2  -1    6.88    0.49
  -4  -2  -1    5.85    0.66
  -4  -2  -1    5.08    0.61
  -4  -2  -1    5.69    0.71
   4   2   1    6.15    0.61
   4   2   1    6.89    0.64
  -5  -2  -1   27.36    2.56
  -5  -2  -1   33.96    2.76
  -5  -2  -1   30.52    2.09
   5   2   1   30.51    2.42
   5   2   1   31.20    2.54
  -6  -2  -1   55.04    3.62
  -6  -2  -1   59.42    4.71
  -6  -2  -1   47.23    4.41
   6   2   1   54.37    4.13
   6   2   1   51.61    3.62
   6   2   1   54.73    4.38
  -7  -2  -1    3.58    0.36
  -7  -2  -1    2.91    0.40
  -7  -2  -1    3.03    0.71
   7   2   1    4.33    0.65
   7   2   1    3.59    0.51
  -8  -2  -1   11.68    0.93
  -8  -2  -1   13.22    1.44
   8   2   1   12.16    1.15
   8   2   1   12.08    1.24
  -9  -2  -1    1.13    0.49
  -9  -2  -1    0.87    0.22
   9   2   1    1.08    0.29
   9   2   1    0.59    0.42
 -10  -2  -1    1.13    0.53
 -10  -2  -1    1.19    0.25
  10   2   1    1.84    0.37
  10   2   1    1.22    0.51
 -11  -2  -1    0.36    0.16
 -11  -2  -1    0.80    0.53
  11   2   1    0.47    0.26
  11   2   1    0.76    0.49
 -12  -2  -1    2.21    0.35
 -12  -2  -1    1.84    0.78
  12   2   1    2.38    0.44
  12   2   1    1.57    0.68
 -13  -2  -1   -0.19    0.12
 -13  -2  -1   -0.16    0.55
  13   2   1   -0.33    0.38
 -14  -2  -1    1.00    0.21
 -14  -2  -1    2.79    1.04
  14   2   1    1.37    0.70
 -15  -2  -1    2.28    1.04
  15   2   1    1.06    0.75
 -16  -2  -1    2.35    1.09
  16   2   1    1.10    0.58
 -17  -2  -1    0.66    0.85
  17   2   1    0.54    0.55
  16  -3  -1   -0.06    0.49
 -16   3   1    0.49    0.97
  15  -3  -1    0.61    0.51
 -15   3   1    2.23    0.96
 -15   3   1    0.50    0.22
  14  -3  -1    0.00    0.47
 -14   3   1   -0.11    0.16
 -14   3   1    0.58    0.88
  13  -3  -1    0.04    0.45
 -13   3   1    0.93    0.91
 -13   3   1   -0.01    0.21
  12  -3  -1    0.69    0.51
 -12   3   1    0.52    0.71
 -12   3   1    0.05    0.22
  11  -3  -1    1.35    0.57
 -11   3   1    0.73    0.64
 -11   3   1    2.08    0.38
  10  -3  -1    4.13    0.74
  10  -3  -1    3.08    0.42
 -10   3   1    4.33    0.55
 -10   3   1    3.94    0.96
   9  -3  -1    0.76    0.24
   9  -3  -1    0.73    0.38
  -9   3   1    1.05    0.59
  -9   3   1    0.56    0.14
  -9   3   1    0.96    0.27
   8  -3  -1    9.77    0.93
   8  -3  -1    8.50    0.99
  -8   3   1   10.13    0.89
  -8   3   1    9.95    0.84
  -8   3   1    9.05    1.26
   7  -3  -1   15.06    1.40
   7  -3  -1   13.41    1.39
  -7   3   1   15.79    1.22
  -7   3   1   16.72    1.75
  -7   3   1   17.89    1.38
   6  -3  -1   24.50    2.16
  -6   3   1   25.41    1.93
  -6   3   1   27.00    2.57
  -6   3   1   29.79    2.25
   5  -3  -1    5.85    0.62
   5  -3  -1    4.90    0.64
  -5   3   1    6.67    0.55
  -5   3   1    6.13    0.57
  -5   3   1    8.14    0.87
   4  -3  -1    8.00    0.68
   4  -3  -1    6.39    0.69
  -4   3   1    6.40    0.81
  -4   3   1    8.46    0.64
  -4   3   1    6.10    0.58
   3  -3  -1    1.97    0.25
   3  -3  -1    2.03    0.29
   3  -3  -1    1.65    0.22
  -3   3   1    1.71    0.37
  -3   3   1    1.87    0.34
  -3   3   1    1.89    0.22
  -3   3   1    2.13    0.20
  -3   3   1    1.61    0.24
   2  -3  -1   18.20    1.45
   2  -3  -1   18.96    1.52
  -2   3   1   18.65    1.51
  -2   3   1   19.21    1.48
  -2   3   1   18.70    1.31
  -2   3   1   17.82    1.64
  -2   3   1   18.37    1.65
   1  -3  -1    1.57    0.19
   1  -3  -1    1.81    0.19
   1  -3  -1    1.69    0.27
  -1   3   1    1.75    0.23
  -1   3   1    1.66    0.27
  -1   3   1    1.66    0.19
   0  -3  -1   70.24    5.37
   0  -3  -1   68.03    4.48
   0  -3  -1   64.52    5.00
   0   3   1   69.02    5.53
   0   3   1   68.81    4.48
   0   3   1   56.79    4.99
   0   3   1   70.13    5.37
  -1  -3  -1    7.75    0.68
  -1  -3  -1    8.16    0.57
  -1  -3  -1    7.55    0.72
   1   3   1    8.17    0.58
   1   3   1    7.81    0.69
  -2  -3  -1    0.20    0.10
  -2  -3  -1    0.18    0.10
  -2  -3  -1    0.38    0.15
  -2  -3  -1    0.58    0.21
  -2  -3  -1    0.27    0.07
   2   3   1    0.31    0.07
   2   3   1    0.21    0.10
  -3  -3  -1    0.43    0.15
  -3  -3  -1    0.33    0.15
  -3  -3  -1    0.38    0.09
  -3  -3  -1    0.44    0.18
  -3  -3  -1    0.34    0.14
   3   3   1    0.34    0.14
   3   3   1    0.43    0.09
   3   3   1    0.41    0.22
  -4  -3  -1   18.97    1.69
  -4  -3  -1   20.48    1.60
  -4  -3  -1   19.61    1.77
  -4  -3  -1   18.48    1.36
  -4  -3  -1   21.31    1.81
   4   3   1   19.29    1.62
   4   3   1   20.18    1.68
  -5  -3  -1    2.41    0.29
  -5  -3  -1    2.24    0.21
  -5  -3  -1    2.03    0.22
   5   3   1    1.96    0.33
   5   3   1    2.57    0.46
  -6  -3  -1   -0.27    0.22
  -6  -3  -1   -0.03    0.05
  -6  -3  -1   -0.09    0.09
   6   3   1    0.04    0.15
   6   3   1   -0.07    0.21
  -7  -3  -1    8.99    1.11
  -7  -3  -1    8.71    0.69
   7   3   1    8.38    0.95
   7   3   1    9.10    0.92
  -8  -3  -1    5.64    0.52
  -8  -3  -1    5.74    0.97
   8   3   1    5.72    0.84
   8   3   1    6.18    0.70
  -9  -3  -1   30.52    2.16
  -9  -3  -1   28.84    2.94
   9   3   1   30.64    2.63
   9   3   1   32.43    2.65
 -10  -3  -1   -0.03    0.36
 -10  -3  -1   -0.16    0.10
  10   3   1   -0.42    0.27
  10   3   1   -0.28    0.20
 -11  -3  -1    0.86    0.21
 -11  -3  -1    1.81    0.62
  11   3   1    1.59    0.39
  11   3   1    1.57    0.59
 -12  -3  -1    0.72    0.19
 -12  -3  -1    0.34    0.63
  12   3   1    0.78    0.56
  12   3   1    0.69    0.33
 -13  -3  -1    1.07    0.71
 -13  -3  -1    0.60    0.17
  13   3   1    0.70    0.25
  13   3   1    0.39    0.49
 -14  -3  -1   -0.24    0.71
 -14  -3  -1    0.20    0.13
  14   3   1   -0.44    0.50
 -15  -3  -1    2.14    0.96
  15   3   1    0.42    0.60
 -16  -3  -1    1.92    1.07
  16   3   1    1.16    0.70
 -17  -3  -1    1.10    0.89
  17   3   1   -0.33    0.48
  16  -4  -1    0.07    0.46
 -16   4   1    0.54    1.05
  15  -4  -1   -0.02    0.46
 -15   4   1    1.61    0.91
 -15   4   1    0.46    0.21
  14  -4  -1   -0.70    0.31
 -14   4   1    0.78    0.84
  13  -4  -1    0.98    0.57
 -13   4   1    0.62    0.89
 -13   4   1    1.35    0.39
  12  -4  -1    1.78    0.67
 -12   4   1    2.53    0.49
 -12   4   1    2.29    0.94
  11  -4  -1   10.00    1.19
 -11   4   1   11.15    0.96
 -11   4   1    9.48    1.60
  10  -4  -1    3.15    0.66
 -10   4   1    4.08    0.55
 -10   4   1    2.50    0.85
   9  -4  -1    0.75    0.41
  -9   4   1    0.81    0.55
  -9   4   1    1.23    0.32
   8  -4  -1    1.45    0.40
  -8   4   1    1.57    0.32
  -8   4   1    0.69    0.52
   7  -4  -1    0.45    0.28
  -7   4   1    2.08    0.54
  -7   4   1    0.62    0.23
   6  -4  -1   19.17    1.56
  -6   4   1   18.25    1.37
  -6   4   1   16.73    1.84
   5  -4  -1   34.30    2.65
  -5   4   1   32.67    3.07
  -5   4   1   35.03    2.73
  -5   4   1   32.67    2.38
   4  -4  -1    1.80    0.28
   4  -4  -1    2.39    0.36
  -4   4   1    2.18    0.46
  -4   4   1    1.85    0.20
  -4   4   1    2.12    0.29
   3  -4  -1   36.59    2.63
   3  -4  -1   39.75    2.78
   3  -4  -1   34.65    2.75
  -3   4   1   29.53    2.97
  -3   4   1   34.71    2.37
  -3   4   1   28.35    2.95
   2  -4  -1    1.68    0.19
   2  -4  -1    1.25    0.18
   2  -4  -1    1.68    0.21
   2  -4  -1    1.47    0.27
  -2   4   1    1.38    0.26
  -2   4   1    1.85    0.24
  -2   4   1    2.45    0.29
   1  -4  -1   33.04    2.49
   1  -4  -1   31.82    2.61
   1  -4  -1   33.53    2.72
   1  -4  -1   31.43    2.20
  -1   4   1   31.53    2.72
  -1   4   1   33.74    2.61
  -1   4   1   28.53    2.48
  -1   4   1   32.98    2.21
   0  -4  -1   64.14    4.99
   0  -4  -1   60.70    4.04
   0  -4  -1   57.06    4.56
   0  -4  -1   64.00    4.85
   0   4   1   62.71    4.85
   0   4   1   56.64    4.99
   0   4   1   62.38    4.06
   0   4   1   52.80    4.54
  -1  -4  -1   39.76    3.23
  -1  -4  -1   35.70    3.17
  -1  -4  -1   39.21    2.63
   1   4   1   39.03    2.63
   1   4   1   34.47    3.01
   1   4   1   42.16    3.23
   1   4   1   40.10    3.17
  -2  -4  -1    0.90    0.13
  -2  -4  -1    0.97    0.20
  -2  -4  -1    0.94    0.29
  -2  -4  -1    0.91    0.17
   2   4   1    0.80    0.14
   2   4   1    1.03    0.28
   2   4   1    1.13    0.21
   2   4   1    0.97    0.19
  -3  -4  -1   28.84    1.92
  -3  -4  -1   27.14    2.36
  -3  -4  -1   29.18    2.43
  -3  -4  -1   27.49    2.22
   3   4   1   29.12    2.36
   3   4   1   27.54    1.92
   3   4   1   25.62    2.24
   3   4   1   29.58    2.44
  -4  -4  -1    0.23    0.11
  -4  -4  -1    0.18    0.16
  -4  -4  -1    0.11    0.06
  -4  -4  -1    0.02    0.06
   4   4   1   -0.03    0.17
   4   4   1    0.06    0.07
   4   4   1    0.11    0.15
  -5  -4  -1    5.51    0.45
  -5  -4  -1    5.66    0.68
   5   4   1    6.16    0.62
   5   4   1    5.74    0.67
  -6  -4  -1   89.87    5.89
  -6  -4  -1   85.76    7.47
  -6  -4  -1   92.25    5.89
   6   4   1   79.60    6.66
   6   4   1   90.19    7.15
  -7  -4  -1   16.42    1.14
  -7  -4  -1   15.28    1.63
  -7  -4  -1   15.86    1.15
   7   4   1   16.91    1.53
   7   4   1   15.11    1.47
  -8  -4  -1   11.84    1.43
  -8  -4  -1   12.32    0.95
   8   4   1   13.94    1.27
   8   4   1   13.14    1.33
  -9  -4  -1    2.51    0.61
  -9  -4  -1    2.06    0.29
   9   4   1    2.12    0.45
   9   4   1    2.16    0.59
 -10  -4  -1   -0.22    0.09
 -10  -4  -1   -0.31    0.29
  10   4   1   -0.34    0.30
  10   4   1   -0.08    0.23
 -11  -4  -1    1.52    0.25
 -11  -4  -1    0.89    0.51
  11   4   1    1.25    0.39
  11   4   1    0.62    0.47
 -12  -4  -1    0.72    0.19
 -12  -4  -1    0.50    0.53
  12   4   1   -0.03    0.47
  12   4   1    0.66    0.33
 -13  -4  -1    3.15    0.41
 -13  -4  -1    2.68    0.98
  13   4   1    4.25    0.65
  13   4   1    1.77    0.73
 -14  -4  -1    0.65    0.80
  14   4   1    0.47    0.67
 -15  -4  -1    0.65    0.82
  15   4   1   -0.30    0.49
 -16  -4  -1    2.63    1.15
  16   4   1    2.57    0.85
 -17  -4  -1    5.59    1.42
  17   4   1    3.37    0.95
  16  -5  -1    0.18    0.49
 -16   5   1    0.59    0.94
  15  -5  -1    0.17    0.43
 -15   5   1   -0.68    0.17
 -15   5   1    0.69    0.90
  14  -5  -1   -0.26    0.41
 -14   5   1    0.13    0.20
 -14   5   1    0.74    0.82
  13  -5  -1    0.42    0.49
 -13   5   1    1.31    0.93
 -13   5   1    0.55    0.27
  12  -5  -1   -0.02    0.44
 -12   5   1    0.21    0.27
 -12   5   1    0.94    0.84
  11  -5  -1    0.36    0.38
 -11   5   1    0.01    0.24
 -11   5   1    0.31    0.69
  10  -5  -1   -0.16    0.33
 -10   5   1    0.81    0.60
 -10   5   1    0.57    0.24
   9  -5  -1    1.10    0.38
  -9   5   1    1.46    0.32
  -9   5   1    1.95    0.72
   8  -5  -1   10.41    0.99
  -8   5   1    8.67    0.82
  -8   5   1    7.81    1.30
   7  -5  -1   28.61    2.36
  -7   5   1   30.21    2.82
  -7   5   1   28.41    2.12
   6  -5  -1    1.24    0.32
  -6   5   1    0.90    0.26
  -6   5   1   -0.08    0.38
   5  -5  -1   13.82    1.08
  -5   5   1   11.05    0.94
  -5   5   1    9.96    1.25
   4  -5  -1   11.36    1.02
   4  -5  -1   11.65    0.99
   4  -5  -1   12.43    1.05
  -4   5   1   11.52    1.24
  -4   5   1   12.65    0.94
   3  -5  -1    3.51    0.36
   3  -5  -1    1.96    0.
  -3   5   1    2.59    0.33
  -3   5   1    1.83    0.36
   2  -5  -1    2.22    0.26
   2  -5  -1    3.50    0.38
   2  -5  -1    2.51    0.34
  -2   5   1    2.30    0.37
  -2   5   1    3.03    0.34
   1  -5  -1    0.31    0.12
   1  -5  -1    0.16    0.07
   1  -5  -1    0.09    0.15
   1  -5  -1    0.21    0.10
  -1   5   1    0.46    0.14
  -1   5   1    0.27    0.09
  -1   5   1    0.27    0.11
  -1   5   1    0.25    0.12
   0  -5  -1    2.51    0.29
   0  -5  -1    2.43    0.26
   0  -5  -1    3.26    0.51
   0  -5  -1    2.28    0.24
   0   5   1    1.91    0.26
   0   5   1    2.76    0.45
   0   5   1    2.62    0.28
   0   5   1    2.41    0.28
  -1  -5  -1   15.45    1.38
  -1  -5  -1   15.64    1.09
  -1  -5  -1   15.09    1.31
   1   5   1   15.94    1.32
   1   5   1   15.04    1.10
   1   5   1   14.93    1.36
   1   5   1   15.11    1.30
  -2  -5  -1    6.71    0.64
  -2  -5  -1    6.34    0.50
  -2  -5  -1    6.38    0.61
  -2  -5  -1    5.94    0.73
   2   5   1    6.27    0.70
   2   5   1    5.97    0.50
   2   5   1    7.35    0.61
   2   5   1    5.92    0.63
  -3  -5  -1   12.35    1.16
  -3  -5  -1   10.82    1.01
  -3  -5  -1   12.72    1.07
  -3  -5  -1    9.96    1.04
  -3  -5  -1   11.92    0.84
   3   5   1   11.12    1.06
   3   5   1   11.50    0.85
   3   5   1   12.73    1.09
  -4  -5  -1   10.88    0.96
  -4  -5  -1    9.57    0.71
   4   5   1    9.83    0.93
   4   5   1    8.51    0.70
   4   5   1   10.97    0.98
   4   5   1    8.31    0.93
  -5  -5  -1   43.15    3.02
  -5  -5  -1   45.92    3.86
   5   5   1   45.54    3.71
   5   5   1   43.04    3.53
   5   5   1   44.84    3.02
  -6  -5  -1    1.82    0.18
  -6  -5  -1    1.68    0.41
   6   5   1    1.69    0.37
   6   5   1    1.97    0.50
  -7  -5  -1    3.52    0.29
  -7  -5  -1    3.15    0.63
  -7  -5  -1    3.11    0.33
   7   5   1    3.31    0.56
   7   5   1    3.31    0.67
  -8  -5  -1   16.67    1.17
  -8  -5  -1   16.11    1.70
   8   5   1   13.64    1.55
   8   5   1   16.82    1.54
  -9  -5  -1    0.29    0.34
  -9  -5  -1   -0.15    0.11
   9   5   1    0.07    0.24
   9   5   1   -0.05    0.32
 -10  -5  -1   23.18    2.21
 -10  -5  -1   19.04    1.49
  10   5   1   23.71    1.95
  10   5   1   18.51    1.95
 -11  -5  -1    0.20    0.15
 -11  -5  -1    0.75    0.48
  11   5   1   -0.19    0.29
  11   5   1    0.39    0.40
 -12  -5  -1    0.37    0.15
 -12  -5  -1    0.27    0.54
  12   5   1    0.34    0.33
  12   5   1   -0.11    0.35
 -13  -5  -1    0.22    0.12
 -13  -5  -1    0.35    0.60
  13   5   1    1.08    0.66
  13   5   1    0.48    0.35
 -14  -5  -1    0.31    0.69
  14   5   1   -0.37    0.48
  14   5   1   -0.16    0.19
 -15  -5  -1    0.46    0.84
  15   5   1    0.01    0.51
 -16  -5  -1    1.10    0.98
  16   5   1    0.38    0.60
 -17  -5  -1    4.89    1.50
  17   5   1    4.33    1.15
  15  -6  -1    0.52    0.50
 -15   6   1    1.53    0.38
 -15   6   1    1.34    0.97
  14  -6  -1    0.25    0.42
 -14   6   1   -0.18    0.20
 -14   6   1    1.15    0.81
  13  -6  -1   -0.51    0.37
 -13   6   1    0.12    0.24
 -13   6   1    0.44    0.79
  12  -6  -1    1.87    0.60
 -12   6   1    3.14    1.00
 -12   6   1    1.82    0.43
  11  -6  -1    2.48    0.67
 -11   6   1    3.61    1.08
 -11   6   1    3.13    0.57
  10  -6  -1   25.40    2.24
 -10   6   1   23.87    2.67
 -10   6   1   26.09    1.97
   9  -6  -1    1.10    0.40
  -9   6   1    2.85    0.80
  -9   6   1    1.36    0.35
   8  -6  -1    0.34    0.28
  -8   6   1    0.19    0.21
  -8   6   1    0.97    0.58
   7  -6  -1    0.89    0.32
  -7   6   1    0.61    0.26
  -7   6   1    1.10    0.55
   6  -6  -1    3.28    0.51
  -6   6   1    2.88    0.68
  -6   6   1    2.73    0.44
   5  -6  -1    0.73    0.22
   5  -6  -1    0.54    0.25
   5  -6  -1    0.29    0.10
  -5   6   1    0.35    0.35
  -5   6   1    0.56    0.22
   4  -6  -1   23.78    2.21
   4  -6  -1   30.28    2.20
   4  -6  -1   29.06    2.24
  -4   6   1   27.31    1.97
   3  -6  -1   29.92    2.58
   3  -6  -1   31.55    2.79
   3  -6  -1   34.74    2.59
   3  -6  -1   36.24    2.53
  -3   6   1   27.20    2.76
  -3   6   1   30.90    2.24
   2  -6  -1    6.69    0.74
   2  -6  -1    9.38    0.78
   2  -6  -1    6.75    0.66
  -2   6   1    8.06    0.67
  -2   6   1    8.29    0.65
  -2   6   1    6.52    0.74
   1  -6  -1    0.72    0.15
   1  -6  -1    0.16    0.18
   1  -6  -1    0.81    0.17
  -1   6   1    0.46    0.14
  -1   6   1    0.56    0.16
  -1   6   1    0.49    0.12
   0  -6  -1   78.22    6.01
   0  -6  -1   78.24    5.86
   0  -6  -1   69.62    4.86
   0  -6  -1   72.94    5.54
   0   6   1   64.49    6.01
   0   6   1   75.94    5.84
   0   6   1   60.67    5.49
   0   6   1   77.09    4.89
  -1  -6  -1   10.30    0.96
  -1  -6  -1   10.36    1.09
  -1  -6  -1   10.96    0.81
   1   6   1   11.12    0.83
   1   6   1   11.15    0.96
   1   6   1   10.30    1.04
   1   6   1   12.07    0.99
  -2  -6  -1   47.34    4.01
  -2  -6  -1   48.45    3.86
  -2  -6  -1   48.56    4.09
  -2  -6  -1   47.51    3.29
   2   6   1   48.30    3.31
   2   6   1   51.46    4.07
   2   6   1   47.12    4.00
   2   6   1   51.26    3.86
  -3  -6  -1    0.43    0.26
  -3  -6  -1    0.61    0.12
  -3  -6  -1    0.41    0.15
   3   6   1    0.69    0.20
   3   6   1    0.41    0.15
   3   6   1    0.43    0.12
  -4  -6  -1    0.26    0.27
  -4  -6  -1    0.36    0.16
  -4  -6  -1    0.23    0.08
   4   6   1    0.38    0.19
   4   6   1    0.23    0.16
   4   6   1    0.26    0.09
  -5  -6  -1    1.54    0.34
  -5  -6  -1    1.38    0.18
   5   6   1    1.24    0.41
   5   6   1    1.64    0.22
   5   6   1    1.38    0.33
  -6  -6  -1    0.43    0.09
  -6  -6  -1    0.41    0.28
   6   6   1    0.33    0.13
   6   6   1    0.40    0.34
   6   6   1    0.30    0.25
  -7  -6  -1   23.17    1.62
  -7  -6  -1   24.38    1.63
  -7  -6  -1   21.74    2.19
   7   6   1   24.55    2.10
   7   6   1   20.03    2.04
  -8  -6  -1    3.62    0.36
  -8  -6  -1    4.90    0.79
   8   6   1    3.09    0.72
   8   6   1    4.21    0.66
  -9  -6  -1    1.17    0.22
  -9  -6  -1    1.17    0.53
   9   6   1    1.32    0.53
   9   6   1    1.77    0.46
 -10  -6  -1    5.76    0.53
 -10  -6  -1    7.11    1.12
  10   6   1    4.65    0.91
  10   6   1    6.96    0.84
 -11  -6  -1    0.41    0.17
 -11  -6  -1    1.00    0.57
  11   6   1    0.04    0.40
  11   6   1    0.40    0.32
 -12  -6  -1    0.67    0.66
 -12  -6  -1    0.59    0.16
  12   6   1    0.08    0.35
  12   6   1   -0.21    0.44
 -13  -6  -1    0.13    0.54
 -13  -6  -1   -0.12    0.11
  13   6   1    0.20    0.57
  13   6   1   -0.16    0.33
 -14  -6  -1    2.79    0.95
  14   6   1    3.03    0.64
  14   6   1    3.04    0.93
 -15  -6  -1    3.02    1.07
  15   6   1    2.06    0.81
 -16  -6  -1    2.23    1.06
  16   6   1    2.17    0.84
 -17  -6  -1    2.51    1.06
  17   6   1    0.46    0.59
  15  -7  -1   -0.12    0.43
 -15   7   1    1.42    1.01
 -15   7   1   -0.03    0.27
  14  -7  -1   -0.95    0.30
 -14   7   1   -0.04    0.23
 -14   7   1   -0.15    0.80
  13  -7  -1    1.26    0.55
 -13   7   1    3.71    1.20
 -13   7   1    1.31    0.39
  12  -7  -1    0.44    0.47
 -12   7   1    0.39    0.28
 -12   7   1    1.28    0.88
  11  -7  -1    0.28    0.43
 -11   7   1    1.27    0.42
 -11   7   1    1.95    0.84
  10  -7  -1    1.28    0.46
 -10   7   1    1.31    0.42
 -10   7   1    1.56    0.76
   9  -7  -1    2.42    0.54
  -9   7   1    1.65    0.74
  -9   7   1    2.38    0.47
   8  -7  -1    0.27    0.26
  -8   7   1    0.80    0.51
  -8   7   1    0.41    0.26
   7  -7  -1    7.19    0.81
  -7   7   1    6.52    1.11
  -7   7   1    7.74    0.75
   6  -7  -1   17.74    1.42
  -6   7   1   14.59    1.25
  -6   7   1   14.42    1.67
   5  -7  -1    2.34    0.49
   5  -7  -1    4.07    0.38
  -5   7   1    2.93    0.46
  -5   7   1    4.27    0.73
   4  -7  -1    4.05    0.58
   4  -7  -1    2.99    0.38
  -4   7   1    4.71    0.54
   3  -7  -1   10.38    0.99
   3  -7  -1   12.18    1.08
   3  -7  -1   12.39    1.00
   3  -7  -1   11.07    1.14
  -3   7   1   11.75    0.95
   2  -7  -1    8.46    0.83
   2  -7  -1    8.53    0.85
   2  -7  -1    7.97    0.75
  -2   7   1    8.43    0.74
  -2   7   1    8.74    0.71
  -2   7   1    7.07    0.81
   1  -7  -1   17.24    1.42
   1  -7  -1   15.17    1.46
   1  -7  -1   17.17    1.47
  -1   7   1   17.12    1.40
  -1   7   1   17.26    1.24
  -1   7   1   14.25    1.46
   0  -7  -1    2.04    0.26
   0  -7  -1    3.15    0.57
   0  -7  -1    2.50    0.29
   0   7   1    2.83    0.34
   0   7   1    1.95    0.28
   0   7   1    2.29    0.29
  -1  -7  -1   31.60    2.63
  -1  -7  -1   30.48    2.16
  -1  -7  -1   31.18    2.65
   1   7   1   28.63    2.64
   1   7   1   33.58    2.63
   1   7   1   33.96    2.20
  -2  -7  -1    2.41    0.35
  -2  -7  -1    1.70    0.48
  -2  -7  -1    2.17    0.22
   2   7   1    2.26    0.29
   2   7   1    2.51    0.27
   2   7   1    2.42    0.37
  -3  -7  -1   73.40    6.08
  -3  -7  -1   80.05    6.58
  -3  -7  -1   72.52    5.27
   3   7   1   77.36    5.29
   3   7   1   82.12    6.42
   3   7   1   85.18    6.57
  -4  -7  -1    0.39    0.10
  -4  -7  -1    0.31    0.17
  -4  -7  -1    0.38    0.28
   4   7   1    0.18    0.17
   4   7   1    0.49    0.21
   4   7   1    0.33    0.11
  -5  -7  -1    9.67    1.00
  -5  -7  -1    9.97    0.73
  -5  -7  -1    9.93    1.14
   5   7   1    9.20    0.99
   5   7   1    9.47    0.74
  -6  -7  -1    1.92    0.43
  -6  -7  -1    2.09    0.20
   6   7   1    1.79    0.25
   6   7   1    1.83    0.55
   6   7   1    1.65    0.42
  -7  -7  -1   19.68    1.37
  -7  -7  -1   19.74    1.88
   7   7   1   19.67    1.80
   7   7   1   19.67    1.39
   7   7   1   15.77    1.78
  -8  -7  -1    0.14    0.12
  -8  -7  -1   -0.19    0.31
   8   7   1    0.31    0.36
   8   7   1    0.36    0.30
  -9  -7  -1   13.43    1.67
  -9  -7  -1   16.62    1.16
   9   7   1   15.74    1.65
   9   7   1   16.74    1.59
 -10  -7  -1    8.73    0.71
 -10  -7  -1    8.27    1.27
  10   7   1    8.59    1.26
  10   7   1    8.59    1.04
 -11  -7  -1   13.91    1.51
 -11  -7  -1    9.68    0.83
  11   7   1   12.24    1.25
  11   7   1    9.27    1.42
 -12  -7  -1   11.11    1.66
 -12  -7  -1   11.03    0.86
  12   7   1   10.69    1.26
  12   7   1   12.53    1.72
 -13  -7  -1    4.09    0.99
  13   7   1    2.21    0.83
  13   7   1    3.11    0.67
 -14  -7  -1   -0.10    0.55
  14   7   1    0.00    0.31
  14   7   1    0.35    0.58
 -15  -7  -1    1.90    0.98
  15   7   1    1.12    0.67
 -16  -7  -1    1.75    0.97
  16   7   1    0.49    0.58
 -17  -7  -1    3.69    1.27
  17   7   1    6.34    1.31
  15  -8  -1    0.47    0.52
 -15   8   1   -0.03    0.30
 -15   8   1   -0.05    0.92
  14  -8  -1   -0.06    0.36
 -14   8   1    0.25    0.26
 -14   8   1    0.54    0.92
  13  -8  -1    0.08    0.44
 -13   8   1    0.55    0.91
 -13   8   1    0.18    0.24
  12  -8  -1    1.54    0.58
 -12   8   1    1.22    0.39
 -12   8   1    1.70    0.94
  11  -8  -1    4.17    0.78
 -11   8   1    5.99    1.26
 -11   8   1    3.20    0.60
  10  -8  -1    4.34    0.75
 -10   8   1    3.36    1.01
 -10   8   1    4.10    0.65
   9  -8  -1   14.07    1.40
  -9   8   1   13.42    1.79
  -9   8   1   14.41    1.27
   8  -8  -1    0.53    0.31
  -8   8   1    2.29    0.72
  -8   8   1    1.11    0.33
   7  -8  -1    0.50    0.29
  -7   8   1    0.64    0.46
  -7   8   1    0.76    0.51
   6  -8  -1    0.19    0.24
   6  -8  -1    0.03    0.17
  -6   8   1    0.36    0.23
  -6   8   1   -0.21    0.35
   5  -8  -1   10.72    1.03
   5  -8  -1   11.95    1.02
   5  -8  -1   11.02    1.11
  -5   8   1   12.86    1.36
  -5   8   1   12.76    1.03
   4  -8  -1    9.10    0.79
   4  -8  -1    8.81    0.90
  -4   8   1    6.78    0.77
   3  -8  -1    4.79    0.55
   3  -8  -1    6.40    0.72
   3  -8  -1    7.16    0.74
  -3   8   1    5.82    0.65
   2  -8  -1    5.87    0.59
   2  -8  -1    4.03    0.66
   2  -8  -1    4.62    0.49
  -2   8   1    4.34    0.54
  -2   8   1    4.00    0.51
  -2   8   1    4.11    0.47
   1  -8  -1   45.46    3.73
   1  -8  -1   44.26    3.52
   1  -8  -1   43.92    3.62
  -1   8   1   38.48    3.73
  -1   8   1   46.05    3.60
  -1   8   1   45.24    3.07
   0  -8  -1   23.86    2.20
   0  -8  -1   28.12    2.21
   0   8   1   26.53    1.86
   0   8   1   22.55    2.22
   0   8   1   27.04    2.18
  -1  -8  -1   52.79    4.32
  -1  -8  -1   51.39    4.14
   1   8   1   53.48    3.55
   1   8   1   46.95    4.32
   1   8   1   53.96    4.25
  -2  -8  -1    0.89    0.36
  -2  -8  -1    0.88    0.21
   2   8   1    0.93    0.17
   2   8   1    0.78    0.24
   2   8   1    1.06    0.21
  -3  -8  -1   12.62    1.14
  -3  -8  -1   10.10    1.23
  -3  -8  -1   11.29    0.88
   3   8   1   11.49    1.14
   3   8   1   12.08    0.92
   3   8   1   13.59    1.12
  -4  -8  -1    6.12    0.67
  -4  -8  -1    7.79    1.12
  -4  -8  -1    5.70    0.47
   4   8   1    6.06    0.51
   4   8   1    6.07    0.67
   4   8   1    5.56    0.69
  -5  -8  -1   35.33    2.45
  -5  -8  -1   34.62    3.12
  -5  -8  -1   37.40    3.12
   5   8   1   35.47    3.07
   5   8   1   36.50    2.47
  -6  -8  -1   17.48    1.27
  -6  -8  -1   18.01    1.95
  -6  -8  -1   16.59    1.70
   6   8   1   18.60    1.30
   6   8   1   18.70    1.70
  -7  -8  -1   11.49    1.29
  -7  -8  -1   11.65    0.89
   7   8   1   12.83    1.28
   7   8   1   13.82    0.95
   7   8   1   10.89    1.32
  -8  -8  -1   10.64    1.26
   8   8   1    9.44    1.39
   8   8   1   12.49    1.23
  -9  -8  -1   -0.03    0.35
  -9  -8  -1    0.36    0.14
   9   8   1    0.77    0.46
   9   8   1    0.19    0.32
 -10  -8  -1   38.52    2.72
 -10  -8  -1   42.09    3.72
  10   8   1   43.33    3.51
  10   8   1   33.83    3.37
 -11  -8  -1    2.01    0.67
 -11  -8  -1    2.07    0.27
  11   8   1    1.82    0.66
  11   8   1    2.04    0.60
 -12  -8  -1    3.21    0.83
 -12  -8  -1    1.96    0.27
  12   8   1    3.11    0.67
  12   8   1    2.90    0.84
 -13  -8  -1    0.16    0.53
  13   8   1   -0.06    0.32
  13   8   1    0.18    0.54
 -14  -8  -1    0.55    0.67
  14   8   1    0.24    0.39
  14   8   1   -0.04    0.54
 -15  -8  -1    1.99    0.87
  15   8   1    0.37    0.58
  15   8   1    1.65    0.49
 -16  -8  -1    2.27    0.99
  16   8   1    0.78    0.65
 -17  -8  -1    1.60    0.97
  17   8   1    0.80    0.65
  14  -9  -1    0.54    0.50
 -14   9   1    2.23    1.11
 -14   9   1    1.20    0.38
  13  -9  -1   -0.55    0.34
 -13   9   1    0.26    0.31
 -13   9   1    0.58    0.91
  12  -9  -1    2.95    0.74
 -12   9   1    3.31    0.59
 -12   9   1    2.33    1.03
  11  -9  -1   -0.36    0.30
 -11   9   1   -0.09    0.30
 -11   9   1    0.86    0.77
  10  -9  -1    0.33    0.40
 -10   9   1    1.49    0.74
 -10   9   1    1.09    0.40
   9  -9  -1    0.65    0.38
  -9   9   1    0.18    0.27
  -9   9   1   -0.70    0.55
   8  -9  -1    2.11    0.48
  -8   9   1    1.51    0.67
  -8   9   1    1.36    0.39
   7  -9  -1    2.67    0.52
  -7   9   1    1.43    0.63
  -7   9   1    1.86    0.43
   6  -9  -1    2.01    0.25
   6  -9  -1    1.52    0.41
   6  -9  -1    1.25    0.27
  -6   9   1    1.47    0.36
  -6   9   1    1.87    0.60
   5  -9  -1    1.93    0.29
   5  -9  -1    1.41    0.41
  -5   9   1    2.18    0.60
  -5   9   1    2.00    0.40
   4  -9  -1    1.71    0.41
   4  -9  -1    1.47    0.26
  -4   9   1    1.09    0.31
   3  -9  -1   34.66    2.97
   3  -9  -1   35.28    2.77
   3  -9  -1   32.35    2.77
  -3   9   1   31.72    2.42
   2  -9  -1    0.78    0.27
   2  -9  -1    0.50    0.32
  -2   9   1    0.46    0.20
  -2   9   1    0.38    0.15
  -2   9   1    0.65    0.25
   1  -9  -1   15.40    1.40
   1  -9  -1   14.07    1.28
  -1   9   1   12.37    1.28
  -1   9   1   13.86    1.11
  -1   9   1   13.94    1.23
   0  -9  -1   29.48    2.37
   0  -9  -1   26.34    2.28
   0   9   1   22.98    2.29
   0   9   1   27.40    2.26
   0   9   1   28.99    1.95
  -1  -9  -1   12.22    1.28
  -1  -9  -1   11.72    1.07
   1   9   1   12.06    0.95
   1   9   1   13.00    1.12
   1   9   1   10.86    1.08
  -2  -9  -1   16.04    1.49
  -2  -9  -1   13.98    1.60
   2   9   1   18.05    1.46
   2   9   1   16.64    1.25
   2   9   1   16.77    1.51
  -3  -9  -1   33.07    2.5
  -3  -9  -1   31.48    2.84
   3   9   1   36.65    2.81
   3   9   1   30.41    2.79
   3   9   1   30.81    2.29
  -4  -9  -1   39.30    3.33
  -4  -9  -1   34.74    3.26
   4   9   1   40.23    3.31
   4   9   1   38.58    3.28
   4   9   1   37.29    2.66
  -5  -9  -1   -0.08    0.35
  -5  -9  -1   -0.19    0.21
   5   9   1   -0.18    0.21
   5   9   1    0.09    0.10
  -6  -9  -1    3.43    0.85
  -6  -9  -1    3.78    0.60
  -6  -9  -1    3.03    0.27
   6   9   1    3.19    0.35
   6   9   1    3.82    0.64
  -7  -9  -1    6.95    1.22
  -7  -9  -1    7.98    0.96
   7   9   1    7.63    0.66
   7   9   1    9.23    0.99
  -8  -9  -1   32.93    3.09
   8   9   1   33.31    2.35
   8   9   1   34.74    3.00
  -9  -9  -1    0.89    0.46
   9   9   1    1.18    0.55
   9   9   1    1.68    0.49
 -10  -9  -1    2.30    0.64
 -10  -9  -1    3.06    0.32
  10   9   1    2.30    0.73
  10   9   1    3.23    0.67
 -11  -9  -1    0.77    0.17
 -11  -9  -1    0.54    0.46
  11   9   1    0.97    0.44
  11   9   1    0.88    0.59
 -12  -9  -1    2.17    0.24
 -12  -9  -1    3.67    0.83
  12   9   1    2.45    0.86
  12   9   1    2.99    0.66
 -13  -9  -1    3.62    0.99
  13   9   1    3.17    0.92
  13   9   1    4.10    0.80
 -14  -9  -1   10.92    1.68
  14   9   1   12.87    1.32
  14   9   1    6.32    1.40
 -15  -9  -1    0.11    0.60
  15   9   1   -0.01    0.42
  15   9   1   -0.16    0.55
 -16  -9  -1    0.53    0.80
  16   9   1    0.18    0.58
 -17  -9  -1   -1.12    0.71
  17   9   1   -0.33    0.51
  14 -10  -1    0.38    0.47
 -14  10   1    0.31    0.84
 -14  10   1    0.16    0.29
  13 -10  -1   -0.24    0.38
 -13  10   1    0.30    0.27
 -13  10   1    0.28    0.88
  12 -10  -1    0.88    0.46
 -12  10   1    0.21    0.30
 -12  10   1    0.65    0.87
  11 -10  -1    0.71    0.44
 -11  10   1    0.23    0.76
 -11  10   1    0.69    0.37
  10 -10  -1    7.52    1.08
 -10  10   1    9.05    1.52
 -10  10   1    7.77    1.00
   9 -10  -1    0.50    0.36
  -9  10   1    0.75    0.64
  -9  10   1    0.56    0.35
   8 -10  -1   11.63    1.10
  -8  10   1    5.63    1.26
  -8  10   1    9.37    0.97
   7 -10  -1    2.90    0.56
  -7  10   1    2.75    0.52
  -7  10   1    2.67    0.78
   6 -10  -1   11.00    1.09
   6 -10  -1   10.00    0.93
   6 -10  -1    9.70    0.96
  -6  10   1   11.64    1.34
  -6  10   1   10.89    1.01
   5 -10  -1   -0.25    0.09
   5 -10  -1    0.08    0.24
  -5  10   1    0.13    0.22
  -5  10   1   -0.08    0.37
   4 -10  -1    5.39    0.55
   4 -10  -1    5.37    0.79
   4 -10  -1    5.23    0.56
  -4  10   1    5.09    0.66
   3 -10  -1    0.98    0.39
   3 -10  -1    0.51    0.28
  -3  10   1    0.24    0.23
  -3  10   1    0.58    0.18
   2 -10  -1    8.78    0.91
   2 -10  -1    9.73    1.05
  -2  10   1    8.69    0.82
  -2  10   1    8.30    0.82
  -2  10   1    7.60    0.86
   1 -10  -1    0.50    0.35
   1 -10  -1    0.17    0.18
  -1  10   1   -0.22    0.17
  -1  10   1   -0.11    0.13
  -1  10   1    0.15    0.14
   0 -10  -1    0.40    0.17
   0 -10  -1    0.50    0.39
   0  10   1    0.34    0.16
   0  10   1    0.24    0.20
   0  10   1    0.16    0.16
  -1 -10  -1   64.30    5.32
  -1 -10  -1   68.82    5.58
   1  10   1   67.78    4.58
   1  10   1   71.21    5.48
   1  10   1   60.86    5.59
  -2 -10  -1    7.91    0.80
  -2 -10  -1    9.40    1.31
   2  10   1    8.38    0.87
   2  10   1    7.62    0.77
   2  10   1    8.87    0.73
  -3 -10  -1    0.06    0.33
  -3 -10  -1    0.02    0.18
   3  10   1    0.23    0.22
   3  10   1    0.00    0.13
   3  10   1    0.23    0.15
  -4 -10  -1    1.83    0.65
  -4 -10  -1    2.45    0.46
   4  10   1    2.26    0.47
   4  10   1    2.37    0.34
   4  10   1    2.15    0.40
  -5 -10  -1    3.22    0.54
  -5 -10  -1    1.53    0.62
   5  10   1    3.16    0.57
   5  10   1    2.58    0.36
  -6 -10  -1    3.20    0.58
  -6 -10  -1    3.77    0.88
   6  10   1    3.07    0.60
   6  10   1    3.19    0.40
  -7 -10  -1   39.19    3.47
  -7 -10  -1   36.86    3.46
   7  10   1   38.73    2.69
   7  10   1   40.62    3.41
  -8 -10  -1    2.99    0.65
  -8 -10  -1    3.31    0.85
   8  10   1    4.14    0.41
   8  10   1    3.24    0.65
  -9 -10  -1    0.73    0.42
   9  10   1    0.84    0.40
   9  10   1    0.37    0.16
 -10 -10  -1    0.32    0.35
 -10 -10  -1    0.73    0.16
  10  10   1    0.07    0.42
  10  10   1    1.48    0.48
 -11 -10  -1    8.77    0.67
 -11 -10  -1    6.88    1.19
  11  10   1    7.55    1.36
  11  10   1    9.35    1.12
 -12 -10  -1    1.51    0.66
  12  10   1    2.73    0.66
  12  10   1    1.79    0.71
 -13 -10  -1    1.00    0.69
  13  10   1    0.30    0.63
  13  10   1    1.51    0.59
 -14 -10  -1    1.48    0.73
  14  10   1    0.79    0.50
  14  10   1    0.54    0.69
 -15 -10  -1    0.31    0.54
  15  10   1   -0.51    0.38
  15  10   1   -0.35    0.52
 -16 -10  -1    0.29    0.78
  16  10   1    0.09    0.27
  16  10   1   -0.54    0.45
 -17 -10  -1   -0.50    0.75
  17  10   1    0.85    0.71
  14 -11  -1   -0.07    0.48
 -14  11   1    0.13    0.36
 -14  11   1    0.11    0.96
  13 -11  -1    2.03    0.64
 -13  11   1    2.77    1.15
 -13  11   1    1.58    0.42
  12 -11  -1    0.58    0.40
 -12  11   1    0.34    0.36
 -12  11   1    0.71    0.85
  11 -11  -1   -0.03    0.40
 -11  11   1    0.72    0.39
 -11  11   1    1.59    0.92
  10 -11  -1    0.38    0.41
 -10  11   1    0.01    0.71
 -10  11   1    0.38    0.34
   9 -11  -1    0.07    0.36
  -9  11   1    0.80    0.77
  -9  11   1    0.26    0.29
   8 -11  -1    1.97    0.53
  -8  11   1    1.53    0.49
  -8  11   1    1.52    0.70
   7 -11  -1    5.69    0.84
  -7  11   1    5.70    1.09
  -7  11   1    4.36    0.71
   6 -11  -1   15.53    1.19
   6 -11  -1   15.79    1.36
   6 -11  -1   10.29    1.09
  -6  11   1   13.46    1.20
  -6  11   1   11.90    1.49
   5 -11  -1    5.34    0.81
   5 -11  -1    5.10    0.53
  -5  11   1    3.29    0.79
  -5  11   1    4.10    0.65
   4 -11  -1    0.74    0.36
   4 -11  -1    0.58    0.21
  -4  11   1    0.95    0.31
   3 -11  -1    0.90    0.31
   3 -11  -1    0.52    0.32
  -3  11   1    0.83    0.31
  -3  11   1    0.59    0.20
   2 -11  -1   14.29    1.43
   2 -11  -1   16.03    1.55
  -2  11   1   15.33    1.26
  -2  11   1   14.73    1.33
   1 -11  -1    6.29    0.65
   1 -11  -1    7.35    1.03
  -1  11   1    5.85    0.68
  -1  11   1    4.22    0.59
  -1  11   1    5.35    0.61
   0 -11  -1   25.08    2.17
   0 -11  -1   23.95    1.97
   0  11   1   18.51    1.98
   0  11   1   22.85    1.96
   0  11   1   23.45    1.72
  -1 -11  -1    0.47    0.42
  -1 -11  -1    0.24    0.15
   1  11   1    0.09    0.19
   1  11   1   -0.04    0.17
   1  11   1    0.18    0.17
  -2 -11  -1    0.80    0.49
  -2 -11  -1    0.98    0.25
   2  11   1    0.66    0.25
   2  11   1    1.39    0.25
   2  11   1    1.45    0.36
  -3 -11  -1    1.61    0.59
  -3 -11  -1    2.22    0.41
   3  11   1    2.58    0.35
   3  11   1    1.73    0.32
   3  11   1    1.79    0.45
  -4 -11  -1    0.42    0.39
  -4 -11  -1    0.19    0.28
   4  11   1   -0.08    0.13
   4  11   1    0.15    0.21
   4  11   1    0.02    0.17
  -5 -11  -1   75.35    6.37
  -5 -11  -1   68.24    6.02
   5  11   1   75.21    6.21
   5  11   1   76.99    5.09
  -6 -11  -1    2.39    0.76
  -6 -11  -1    2.13    0.48
   6  11   1    2.26    0.33
   6  11   1    1.79    0.49
  -7 -11  -1    2.74    0.79
  -7 -11  -1    1.75    0.50
   7  11   1    2.44    0.56
   7  11   1    1.60    0.28
  -8 -11  -1   15.74    1.87
  -8 -11  -1   16.50    1.70
   8  11   1   16.58    1.25
   8  11   1   16.96    1.69
  -9 -11  -1    2.00    0.74
  -9 -11  -1    2.89    0.64
   9  11   1    2.50    0.62
   9  11   1    2.25    0.34
 -10 -11  -1    0.01    0.34
 -10 -11  -1   -0.29    0.34
  10  11   1    0.14    0.34
 -11 -11  -1    2.61    0.26
 -11 -11  -1    2.32    0.69
  11  11   1    1.76    0.62
 -12 -11  -1    0.21    0.51
  12  11   1    0.93    0.62
  12  11   1    0.33    0.46
 -13 -11  -1    0.55    0.56
  13  11   1    0.61    0.61
  13  11   1   -0.31    0.38
 -14 -11  -1    0.44    0.55
  14  11   1    0.02    0.47
  14  11   1   -0.54    0.82
 -15 -11  -1    3.26    0.94
  15  11   1    2.75    0.74
  15  11   1    2.72    0.90
 -16 -11  -1    0.37    0.73
  16  11   1    1.78    0.55
  16  11   1    1.22    0.61
 -17 -11  -1    0.12    0.79
  17  11   1    0.02    0.79
  13 -12  -1   -0.04    0.37
 -13  12   1    0.45    0.90
 -13  12   1   -0.38    0.34
  12 -12  -1    0.24    0.38
 -12  12   1    0.81    0.41
 -12  12   1    0.59    0.95
  11 -12  -1    0.07    0.38
 -11  12   1   -0.05    0.27
 -11  12   1    0.67    0.82
  10 -12  -1    0.41    0.43
 -10  12   1    0.36    0.70
 -10  12   1    0.38    0.41
   9 -12  -1    7.21    1.06
  -9  12   1    6.38    0.90
  -9  12   1    4.46    1.17
   8 -12  -1    1.45    0.47
  -8  12   1    1.50    0.64
  -8  12   1    0.33    0.35
   7 -12  -1    0.35    0.36
  -7  12   1    0.44    0.36
  -7  12   1    0.37    0.63
   6 -12  -1   -0.23    0.18
   6 -12  -1    0.36    0.34
  -6  12   1   -0.20    0.43
  -6  12   1   -0.07    0.26
   5 -12  -1    1.29    0.31
   5 -12  -1    2.11    0.57
  -5  12   1    1.77    0.46
  -5  12   1    2.64    0.73
   4 -12  -1    0.21    0.16
   4 -12  -1    0.21    0.31
  -4  12   1   -0.01    0.21
   3 -12  -1    1.87    0.54
   3 -12  -1    1.64    0.42
  -3  12   1    2.04    0.45
  -3  12   1    2.23    0.36
   2 -12  -1   18.67    1.68
   2 -12  -1   14.45    1.48
  -2  12   1   16.50    1.34
  -2  12   1   15.18    1.41
   1 -12  -1    1.88    0.58
   1 -12  -1    2.07    0.39
  -1  12   1    1.90    0.42
  -1  12   1    1.27    0.30
  -1  12   1    1.92    0.38
   0 -12  -1   52.60    4.24
   0 -12  -1   48.40    4.16
   0  12   1   47.18    3.53
   0  12   1   49.78    4.15
  -1 -12  -1    0.43    0.45
  -1 -12  -1    0.76    0.21
   1  12   1    1.08    0.30
   1  12   1    0.69    0.26
   1  12   1    0.47    0.21
  -2 -12  -1   21.17    1.83
  -2 -12  -1   18.06    2.03
   2  12   1   18.69    1.79
   2  12   1   21.25    1.58
   2  12   1   22.77    1.89
  -3 -12  -1   43.91    3.78
  -3 -12  -1   39.64    3.76
   3  12   1   44.48    3.74
   3  12   1   44.31    3.72
   3  12   1   44.34    3.09
  -4 -12  -1    7.58    0.90
  -4 -12  -1    7.00    1.25
   4  12   1    8.51    0.94
   4  12   1    7.64    0.73
   4  12   1    8.90    0.86
  -5 -12  -1    7.67    1.37
  -5 -12  -1   11.22    1.13
   5  12   1    9.77    1.09
   5  12   1    9.62    0.84
  -6 -12  -1    0.69    0.36
  -6 -12  -1    0.76    0.52
   6  12   1    0.64    0.21
   6  12   1    0.39    0.30
  -7 -12  -1    5.20    1.13
  -7 -12  -1    6.01    0.91
   7  12   1    5.96    0.94
   7  12   1    6.66    0.60
  -8 -12  -1   10.32    1.69
  -8 -12  -1   12.71    1.41
   8  12   1   13.67    1.41
   8  12   1   12.50    1.00
  -9 -12  -1   15.97    1.83
  -9 -12  -1   16.31    1.99
   9  12   1   18.66    1.34
   9  12   1   18.75    1.83
 -10 -12  -1    0.15    0.35
 -10 -12  -1   -0.05    0.37
  10  12   1    0.08    0.14
  10  12   1    0.13    0.37
 -11 -12  -1    0.65    0.53
 -11 -12  -1    0.66    0.45
  11  12   1    1.15    0.55
 -12 -12  -1    7.61    1.54
 -12 -12  -1   11.13    1.43
  12  12   1   10.07    1.28
 -13 -12  -1    0.77    0.69
  13  12   1    0.70    0.57
 -14 -12  -1    0.08    0.50
  14  12   1    0.08    0.48
  14  12   1   -0.46    0.56
 -15 -12  -1    0.63    0.72
  15  12   1    0.48    0.53
  15  12   1   -0.17    0.45
 -16 -12  -1    1.65    0.81
  16  12   1    0.61    0.63
  16  12   1    0.61    0.54
 -17 -12  -1   -0.81    0.68
  17  12   1   -0.32    0.58
  13 -13  -1    0.11    0.42
 -13  13   1    0.02    0.83
 -13  13   1   -0.31    0.40
  12 -13  -1   -0.24    0.34
 -12  13   1   -0.89    0.91
 -12  13   1   -0.32    0.33
  11 -13  -1    0.55    0.39
 -11  13   1    0.21    0.36
 -11  13   1    0.87    0.84
  10 -13  -1    1.51    0.54
 -10  13   1    2.90    1.03
 -10  13   1    1.46    0.52
   9 -13  -1    4.27    0.84
  -9  13   1    5.59    1.20
  -9  13   1    4.94    0.80
   8 -13  -1    5.03    0.87
  -8  13   1    3.68    0.72
  -8  13   1    7.29    1.23
   7 -13  -1    3.60    0.72
  -7  13   1    2.30    0.54
  -7  13   1    1.70    0.76
   6 -13  -1    7.45    1.07
   6 -13  -1    8.04    0.74
  -6  13   1    5.82    0.89
  -6  13   1    4.81    1.06
   5 -13  -1    0.32    0.23
   5 -13  -1    1.19    0.47
  -5  13   1    0.42    0.33
  -5  13   1    0.42    0.47
   4 -13  -1   14.35    1.42
  -4  13   1   11.71    1.18
   3 -13  -1   10.52    1.32
   3 -13  -1   14.21    1.32
  -3  13   1   13.37    1.21
  -3  13   1   11.96    1.16
   2 -13  -1    0.01    0.15
   2 -13  -1   -0.03    0.32
  -2  13   1    0.67    0.30
  -2  13   1   -0.10    0.13
   1 -13  -1    1.43    0.53
   1 -13  -1    1.78    0.36
  -1  13   1    1.66    0.29
  -1  13   1    1.26    0.40
  -1  13   1    1.99    0.39
   0 -13  -1    1.21    0.26
   0 -13  -1    0.41    0.42
   0  13   1    0.90    0.24
   0  13   1    1.04    0.33
   0  13   1    0.94    0.29
  -1 -13  -1   13.79    1.77
  -1 -13  -1   18.43    1.56
   1  13   1   19.80    1.64
   1  13   1   14.65    1.57
   1  13   1   19.24    1.43
  -2 -13  -1   12.63    1.78
  -2 -13  -1   13.07    1.23
   2  13   1   16.16    1.16
   2  13   1   12.07    1.20
   2  13   1   13.10    1.30
  -3 -13  -1   12.49    1.23
  -3 -13  -1   13.37    1.58
   3  13   1   11.76    1.07
   3  13   1   13.42    1.31
   3  13   1   13.32    1.19
  -4 -13  -1    8.87    0.94
  -4 -13  -1   10.13    1.56
   4  13   1    8.58    0.88
   4  13   1    8.11    0.78
   4  13   1    8.42    0.98
  -5 -13  -1    5.37    0.82
  -5 -13  -1    5.95    1.16
   5  13   1    6.20    0.89
   5  13   1    5.19    0.57
  -6 -13  -1   11.87    1.79
  -6 -13  -1   14.17    1.47
   6  13   1   14.39    1.47
   6  13   1   13.65    1.10
  -7 -13  -1   17.14    2.06
  -7 -13  -1   18.65    1.89
   7  13   1   19.33    1.42
   7  13   1   18.35    1.85
  -8 -13  -1    8.95    1.58
  -8 -13  -1   10.14    1.21
   8  13   1   10.20    1.20
   8  13   1    9.44    0.82
  -9 -13  -1    7.80    1.06
  -9 -13  -1    6.75    1.37
   9  13   1    7.86    0.70
   9  13   1    7.75    1.17
 -10 -13  -1    5.39    0.96
 -10 -13  -1    3.73    1.02
  10  13   1    5.42    0.53
  10  13   1    5.29    0.98
 -11 -13  -1    0.81    0.51
 -11 -13  -1    0.31    0.45
  11  13   1    0.13    0.46
 -12 -13  -1    2.09    0.86
 -12 -13  -1    2.36    0.81
  12  13   1    2.94    0.79
 -13 -13  -1    0.61    0.54
 -13 -13  -1    0.11    0.51
  13  13   1    0.13    0.46
 -14 -13  -1    0.18    0.61
 -14 -13  -1    0.23    0.58
  14  13   1    0.01    0.46
 -15 -13  -1    1.26    0.74
  15  13   1    2.43    0.71
 -16 -13  -1   -0.05    0.69
  16  13   1    0.24    0.41
  12 -14  -1    0.62    0.48
 -12  14   1   -0.24    0.41
 -12  14   1   -0.73    0.84
  11 -14  -1    0.44    0.36
 -11  14   1    0.52    0.42
 -11  14   1    0.27    0.85
  10 -14  -1   -0.20    0.36
 -10  14   1   -0.53    0.29
 -10  14   1    0.52    0.82
   9 -14  -1    1.73    0.57
  -9  14   1    0.67    0.42
  -9  14   1    0.54    0.81
   8 -14  -1    0.47    0.44
  -8  14   1    1.70    0.74
  -8  14   1    0.36    0.36
   7 -14  -1    0.41    0.42
  -7  14   1   -0.28    0.55
  -7  14   1    0.05    0.35
   6 -14  -1    2.05    0.62
  -6  14   1    2.57    0.77
  -6  14   1    1.37    0.46
   5 -14  -1   10.32    1.14
   5 -14  -1    8.70    0.88
  -5  14   1    6.88    0.97
  -5  14   1    8.24    1.25
   4 -14  -1    4.32    0.85
  -4  14   1    3.38    0.68
   3 -14  -1    1.85    0.59
   3 -14  -1    1.79    0.42
  -3  14   1    1.54    0.32
  -3  14   1    1.53    0.45
   2 -14  -1    7.51    1.27
   2 -14  -1    9.52    0.97
  -2  14   1    8.99    0.91
  -2  14   1    8.15    1.00
   1 -14  -1    0.05    0.35
   1 -14  -1   -0.14    0.13
  -1  14   1    0.00    0.16
  -1  14   1   -0.27    0.08
  -1  14   1   -0.20    0.23
   0 -14  -1    0.93    0.23
   0 -14  -1    0.45    0.40
   0  14   1    0.80    0.27
   0  14   1    0.78    0.36
   0  14   1    0.87    0.21
  -1 -14  -1   15.36    1.85
  -1 -14  -1   20.12    1.62
   1  14   1   15.14    1.63
   1  14   1   18.93    1.69
   1  14   1   19.16    1.49
  -2 -14  -1    1.45    0.64
  -2 -14  -1    1.58    0.29
   2  14   1    1.28    0.28
   2  14   1    1.63    0.41
   2  14   1    1.50    0.36
  -3 -14  -1   14.87    1.82
  -3 -14  -1   16.28    1.51
   3  14   1   17.76    1.35
   3  14   1   17.04    1.60
   3  14   1   15.39    1.46
  -4 -14  -1   11.81    1.22
  -4 -14  -1   10.39    1.66
   4  14   1   12.51    1.18
   4  14   1   13.48    1.31
   4  14   1   11.57    1.04
  -5 -14  -1    6.68    1.31
  -5 -14  -1    8.14    0.98
   5  14   1    7.62    0.78
   5  14   1    9.42    1.03
   5  14   1    9.52    1.02
  -6 -14  -1   -0.13    0.33
  -6 -14  -1    0.88    0.54
   6  14   1    0.61    0.23
   6  14   1    0.94    0.35
  -7 -14  -1    6.14    0.94
  -7 -14  -1    3.61    1.00
   7  14   1    5.30    0.87
   7  14   1    4.96    0.54
  -8 -14  -1    0.36    0.53
  -8 -14  -1    0.79    0.46
   8  14   1    0.31    0.35
   8  14   1    0.21    0.18
  -9 -14  -1    0.46    0.42
  -9 -14  -1    0.01    0.29
   9  14   1    0.17    0.18
   9  14   1    0.18    0.38
 -10 -14  -1   -0.13    0.40
 -10 -14  -1    0.18    0.37
  10  14   1    0.16    0.41
  10  14   1    0.04    0.16
 -11 -14  -1    1.34    0.61
 -11 -14  -1    0.16    0.46
  11  14   1   -0.05    0.44
 -12 -14  -1    9.22    1.49
 -12 -14  -1    6.64    1.50
  12  14   1   11.39    1.37
 -13 -14  -1   -0.38    0.51
 -13 -14  -1   -0.44    0.37
  13  14   1   -0.32    0.49
 -14 -14  -1   -0.81    0.39
 -14 -14  -1   -0.64    0.57
  14  14   1    0.22    0.43
 -15 -14  -1   -0.37    0.61
 -15 -14  -1   -0.04    0.76
  15  14   1    0.54    0.59
 -16 -14  -1    0.15    0.62
 -16 -14  -1   -0.28    0.62
  16  14   1   -0.19    0.45
  12 -15  -1    1.84    0.61
 -12  15   1    0.08    0.92
 -12  15   1    1.81    0.55
  11 -15  -1    0.98    0.54
 -11  15   1    0.16    0.90
 -11  15   1    0.38    0.50
  10 -15  -1    0.45    0.46
 -10  15   1    0.03    0.74
 -10  15   1    0.81    0.46
   9 -15  -1    4.79    0.90
  -9  15   1    4.46    1.13
  -9  15   1    5.06    0.87
   8 -15  -1    5.53    0.95
  -8  15   1    5.30    1.13
  -8  15   1    4.33    0.80
   7 -15  -1    0.46    0.41
  -7  15   1    0.27    0.51
  -7  15   1   -0.33    0.33
   6 -15  -1   -0.41    0.29
  -6  15   1   -0.35    0.48
  -6  15   1   -0.29    0.26
   5 -15  -1    0.55    0.24
   5 -15  -1    0.36    0.45
  -5  15   1    0.12    0.50
  -5  15   1    0.43    0.29
   4 -15  -1    0.90    0.48
  -4  15   1    0.25    0.39
   3 -15  -1    0.20    0.41
  -3  15   1    0.41    0.35
  -3  15   1    0.17    0.14
   2 -15  -1   17.73    1.88
   2 -15  -1   17.79    1.67
  -2  15   1   16.45    1.55
  -2  15   1   17.70    1.60
   1 -15  -1    2.27    0.39
   1 -15  -1    2.48    0.71
  -1  15   1    1.22    0.21
  -1  15   1    1.60    0.45
  -1  15   1    2.54    0.43
   0 -15  -1    1.68    0.61
   0 -15  -1    0.88    0.24
   0  15   1    0.95    0.40
   0  15   1    1.04    0.32
   0  15   1    1.02    0.22
  -1 -15  -1    0.04    0.11
  -1 -15  -1    0.13    0.38
   1  15   1    0.22    0.16
   1  15   1   -0.26    0.23
   1  15   1    0.04    0.16
  -2 -15  -1   14.06    1.27
  -2 -15  -1   12.19    1.85
   2  15   1   13.72    1.22
   2  15   1   12.82    1.27
   2  15   1   15.88    1.42
  -3 -15  -1    1.86    0.35
  -3 -15  -1    1.91    0.70
   3  15   1    1.86    0.42
   3  15   1    2.18    0.52
   3  15   1    1.78    0.31
  -4 -15  -1    0.81    0.27
  -4 -15  -1    0.97    0.60
   4  15   1    0.67    0.28
   4  15   1    0.69    0.24
   4  15   1    0.88    0.37
  -5 -15  -1   20.02    1.91
  -5 -15  -1   19.05    2.17
   5  15   1   21.20    1.96
   5  15   1   18.37    1.87
   5  15   1   21.03    1.57
  -6 -15  -1   -0.01    0.28
  -6 -15  -1    0.28    0.37
   6  15   1   -0.02    0.17
   6  15   1   -0.33    0.15
  -7 -15  -1    1.02    0.47
  -7 -15  -1    1.27    0.66
   7  15   1    0.89    0.44
   7  15   1    1.32    0.29
  -8 -15  -1    4.96    0.93
  -8 -15  -1    3.93    1.07
   8  15   1    5.45    0.56
   8  15   1    4.07    0.88
  -9 -15  -1   10.77    1.92
  -9 -15  -1   15.99    1.73
   9  15   1   15.27    1.20
   9  15   1   15.28    1.69
 -10 -15  -1    0.46    0.38
 -10 -15  -1    0.48    0.45
  10  15   1   -0.25    0.39
  10  15   1    0.01    0.12
 -11 -15  -1    0.61    0.51
 -11 -15  -1   -0.17    0.29
  11  15   1    0.42    0.50
 -12 -15  -1   -0.08    0.45
 -12 -15  -1    0.21    0.58
  12  15   1    0.09    0.52
 -13 -15  -1   -0.23    0.50
 -13 -15  -1    0.43    0.62
  13  15   1   -0.17    0.44
 -14 -15  -1    2.50    0.99
 -14 -15  -1    2.48    0.89
  14  15   1    4.36    0.92
 -15 -15  -1    2.44    0.98
 -15 -15  -1    3.44    0.96
  15  15   1    4.18    0.96
 -16 -15  -1   11.03    1.92
 -16 -15  -1    9.12    1.89
  16  15   1   14.13    1.62
  11 -16  -1    0.41    0.45
 -11  16   1   -1.04    0.69
 -11  16   1    0.92    0.52
  10 -16  -1    0.45    0.42
 -10  16   1   -0.59    0.73
 -10  16   1    0.24    0.42
   9 -16  -1    0.74    0.51
  -9  16   1    0.56    0.50
  -9  16   1    0.78    0.81
   8 -16  -1    0.62    0.52
  -8  16   1    0.04    0.42
  -8  16   1   -0.23    0.64
   7 -16  -1    0.65    0.51
  -7  16   1    2.39    0.68
  -7  16   1    0.61    0.42
   6 -16  -1    0.12    0.41
  -6  16   1    0.15    0.60
  -6  16   1    0.58    0.39
   5 -16  -1    0.80    0.23
   5 -16  -1    1.02    0.58
  -5  16   1    0.31    0.54
  -5  16   1    0.57    0.44
   4 -16  -1    2.07    0.71
  -4  16   1    2.31    0.63
  -4  16   1    1.84    0.67
   3 -16  -1    0.34    0.43
  -3  16   1    0.05    0.14
  -3  16   1   -0.33    0.39
   2 -16  -1   -0.19    0.14
   2 -16  -1   -0.23    0.33
  -2  16   1    0.09    0.12
  -2  16   1    0.03    0.38
   1 -16  -1    2.46    0.78
   1 -16  -1    3.77    0.46
  -1  16   1    3.27    0.63
  -1  16   1    2.93    0.56
   0 -16  -1    7.16    0.72
   0 -16  -1    5.48    1.15
   0  16   1    7.67    0.97
   0  16   1    6.81    0.81
  -1 -16  -1    7.86    0.74
  -1 -16  -1    6.10    1.25
   1  16   1    6.14    0.87
   1  16   1    7.87    0.89
  -2 -16  -1   13.44    1.97
  -2 -16  -1   15.16    1.32
   2  16   1   18.30    1.36
   2  16   1   16.32    1.49
   2  16   1   12.10    1.31
  -3 -16  -1    2.71    0.82
   3  16   1    2.05    0.35
   3  16   1    3.32    0.58
   3  16   1    2.31    0.54
  -4 -16  -1    0.00    0.12
  -4 -16  -1    0.20    0.42
   4  16   1    0.08    0.26
   4  16   1   -0.13    0.23
  -5 -16  -1   -0.18    0.33
  -5 -16  -1    0.33    0.20
   5  16   1   -0.03    0.23
   5  16   1    0.15    0.29
  -6 -16  -1    9.21    1.69
  -6 -16  -1   13.11    1.34
   6  16   1   12.48    1.38
   6  16   1   12.72    1.09
  -7 -16  -1    1.06    0.59
  -7 -16  -1    1.35    0.48
   7  16   1    1.35    0.34
   7  16   1    1.46    0.48
  -8 -16  -1    0.54    0.56
  -8 -16  -1    0.87    0.48
   8  16   1    1.22    0.53
   8  16   1    1.04    0.29
  -9 -16  -1    0.05    0.37
  -9 -16  -1    0.25    0.43
   9  16   1    0.44    0.48
   9  16   1    0.20    0.17
 -10 -16  -1    0.73    0.58
 -10 -16  -1    0.93    0.54
  10  16   1    0.72    0.50
 -11 -16  -1    7.31    1.55
 -11 -16  -1    9.76    1.49
  11  16   1   10.01    1.46
 -12 -16  -1    1.16    0.72
 -12 -16  -1    0.28    0.57
  12  16   1    0.27    0.54
 -13 -16  -1    7.02    1.59
 -13 -16  -1    8.41    1.50
  13  16   1   14.14    1.54
 -14 -16  -1    2.92    0.85
 -14 -16  -1    2.18    0.98
  14  16   1    3.65    0.92
 -15 -16  -1    0.67    0.68
 -15 -16  -1    0.86    0.66
  15  16   1    0.52    0.54
 -16 -16  -1   -0.91    0.59
 -16 -16  -1    0.16    0.56
  16  16   1    0.28    0.49
  10 -17  -1   -0.10    0.42
 -10  17   1   -0.51    0.42
   9 -17  -1    0.20    0.39
  -9  17   1   -0.18    0.48
   8 -17  -1   -0.16    0.42
  -8  17   1   -0.20    0.46
   7 -17  -1    0.94    0.57
  -7  17   1    0.22    0.42
  -7  17   1    1.21    0.59
   6 -17  -1   -0.01    0.40
  -6  17   1    0.67    0.54
  -6  17   1   -0.04    0.33
   5 -17  -1    1.65    0.66
  -5  17   1    1.68    0.68
  -5  17   1    1.88    0.65
   4 -17  -1    1.61    0.71
  -4  17   1    0.86    0.55
  -4  17   1    1.34    0.63
   3 -17  -1    0.26    0.47
  -3  17   1    0.13    0.14
  -3  17   1    0.56    0.46
   2 -17  -1    5.22    1.08
  -2  17   1    4.88    0.61
  -2  17   1    4.93    0.85
   1 -17  -1    3.22    0.89
  -1  17   1    2.73    0.64
  -1  17   1    3.18    0.56
   0 -17  -1    4.98    1.12
   0  17   1    4.83    0.76
   0  17   1    5.68    0.84
  -1 -17  -1    2.13    0.73
   1  17   1    2.11    0.49
   1  17   1    2.94    0.61
  -2 -17  -1    0.67    0.51
   2  17   1    0.38    0.27
   2  17   1   -0.20    0.28
  -3 -17  -1    7.13    1.41
   3  17   1    8.85    1.04
   3  17   1    9.01    1.04
  -4 -17  -1    1.34    0.65
   4  17   1    0.41    0.30
   4  17   1    0.79    0.37
  -5 -17  -1    0.37    0.42
  -5 -17  -1    0.19    0.13
   5  17   1    0.20    0.26
   5  17   1    0.52    0.29
  -6 -17  -1    8.28    1.60
  -6 -17  -1   10.82    1.13
   6  17   1   10.58    1.25
   6  17   1   12.11    1.03
  -7 -17  -1    0.19    0.44
  -7 -17  -1    0.36    0.33
   7  17   1    0.34    0.25
   7  17   1    0.25    0.26
  -8 -17  -1    0.13    0.45
  -8 -17  -1    0.12    0.30
   8  17   1    0.16    0.21
   8  17   1   -0.08    0.34
  -9 -17  -1    0.13    0.37
  -9 -17  -1   -0.42    0.31
   9  17   1    0.08    0.44
   9  17   1    0.55    0.23
 -10 -17  -1   14.03    2.43
 -10 -17  -1   18.63    2.01
  10  17   1   19.97    2.05
 -11 -17  -1   -0.25    0.40
 -11 -17  -1    0.44    0.48
  11  17   1    0.68    0.57
 -12 -17  -1    1.21    0.59
 -12 -17  -1    1.49    0.75
  12  17   1    2.06    0.68
 -13 -17  -1    0.38    0.67
  13  17   1    0.70    0.57
 -14 -17  -1    0.18    0.64
  14  17   1    0.54    0.53
 -15 -17  -1    1.10    0.70
  15  17   1    0.86    0.56
  10 -18  -1    0.55    0.52
 -10  18   1   -0.25    0.36
   9 -18  -1    1.00    0.55
  -9  18   1    1.09    0.60
   8 -18  -1    0.58    0.49
  -8  18   1    2.59    0.72
   7 -18  -1    1.98    0.71
  -7  18   1    1.37    0.67
   6 -18  -1   -0.04    0.46
  -6  18   1   -0.75    0.35
   5 -18  -1    4.77    1.03
  -5  18   1    3.12    0.88
   4 -18  -1   -0.31    0.48
  -4  18   1   -0.21    0.45
   3 -18  -1    5.26    1.08
  -3  18   1    3.87    0.84
  -3  18   1    4.41    0.55
   2 -18  -1    2.40    0.80
  -2  18   1    3.53    0.76
  -2  18   1    2.73    0.51
   1 -18  -1    8.17    1.49
  -1  18   1    8.52    0.92
  -1  18   1    8.25    1.12
   0 -18  -1   -0.09    0.38
   0  18   1   -0.08    0.14
   0  18   1   -0.02    0.38
  -1 -18  -1   -0.14    0.33
   1  18   1    0.03    0.20
   1  18   1    0.26    0.37
  -2 -18  -1    5.25    1.18
   2  18   1    6.89    0.87
   2  18   1    7.16    0.95
  -3 -18  -1    8.40    1.62
   3  18   1   10.71    1.07
   3  18   1    9.57    1.15
  -4 -18  -1    0.78    0.56
   4  18   1    0.96    0.36
   4  18   1    0.90    0.39
  -5 -18  -1   12.89    2.18
   5  18   1   17.04    1.72
   5  18   1   17.37    1.44
  -6 -18  -1    1.07    0.63
   6  18   1    1.08    0.42
   6  18   1    1.50    0.41
  -7 -18  -1   11.59    2.04
   7  18   1   16.21    1.67
   7  18   1   15.27    1.29
  -8 -18  -1    2.07    0.84
   8  18   1    3.14    0.76
   8  18   1    2.75    0.50
  -9 -18  -1    0.50    0.55
   9  18   1    1.16    0.27
   9  18   1    1.67    0.61
 -10 -18  -1   -0.41    0.32
  10  18   1    0.10    0.42
 -11 -18  -1    0.28    0.49
  11  18   1    0.46    0.45
 -12 -18  -1    1.60    0.89
  12  18   1    2.12    0.77
 -13 -18  -1   -0.18    0.57
  13  18   1    0.40    0.54
 -14 -18  -1    1.13    0.79
  14  18   1    3.53    0.87
 -15 -18  -1   -0.45    0.38
  15  18   1   -0.51    0.35
   9 -19  -1   -0.24    0.39
  -9  19   1   -0.35    0.38
   8 -19  -1    2.43    0.73
  -8  19   1    2.45    0.67
   7 -19  -1   -0.29    0.35
  -7  19   1    0.29    0.43
   6 -19  -1    5.21    1.06
  -6  19   1    3.74    0.95
   5 -19  -1   -0.02    0.74
  -5  19   1   -0.86    0.58
   4 -19  -1    3.38    0.96
  -4  19   1    4.37    0.91
   3 -19  -1    0.34    0.49
  -3  19   1    1.18    0.62
  -3  19   1    0.37    0.14
   2 -19  -1    1.49    0.70
  -2  19   1    1.54    0.37
  -2  19   1    1.30    0.61
   1 -19  -1    6.66    1.33
  -1  19   1    7.06    0.82
  -1  19   1    6.83    1.08
   0 -19  -1    2.80    0.89
   0  19   1    1.85    0.46
   0  19   1    3.18    0.70
  -1 -19  -1    0.43    0.47
   1  19   1    0.31    0.45
   1  19   1    0.24    0.25
  -2 -19  -1    2.28    0.78
   2  19   1    3.22    0.66
   2  19   1    2.73    0.65
  -3 -19  -1    7.11    1.47
   3  19   1   11.65    1.21
   3  19   1   10.44    1.12
  -4 -19  -1    0.00    0.42
   4  19   1    1.28    0.39
   4  19   1    0.52    0.36
  -5 -19  -1   -0.46    0.33
   5  19   1    0.35    0.29
   5  19   1    0.20    0.29
  -6 -19  -1    0.42    0.43
   6  19   1    0.99    0.39
   6  19   1    1.50    0.48
  -7 -19  -1    1.79    0.76
   7  19   1    3.60    0.58
   7  19   1    3.43    0.76
  -8 -19  -1    0.35    0.41
   8  19   1    0.76    0.30
   8  19   1    0.83    0.39
  -9 -19  -1    7.58    1.67
   9  19   1   13.20    1.55
 -10 -19  -1    0.27    0.49
  10  19   1    0.96    0.59
 -11 -19  -1    0.25    0.53
  11  19   1    0.25    0.50
 -12 -19  -1    0.00    0.56
  12  19   1    0.17    0.41
 -13 -19  -1    0.62    0.86
  13  19   1    1.56    0.61
 -14 -19  -1    0.25    0.55
  14  19   1    0.34    0.55
   8 -20  -1    0.75    0.55
  -8  20   1    0.48    0.39
   7 -20  -1    0.52    0.52
  -7  20   1    1.12    0.57
   6 -20  -1    0.11    0.45
  -6  20   1    0.13    0.59
   5 -20  -1    0.61    0.59
  -5  20   1    0.92    0.60
   4 -20  -1    5.62    1.14
  -4  20   1    3.84    0.97
   3 -20  -1    0.25    0.54
  -3  20   1    0.96    0.61
   2 -20  -1    0.82    0.75
  -2  20   1    1.14    0.61
  -2  20   1    0.77    0.22
   1 -20  -1   -0.09    0.44
  -1  20   1    0.06    0.44
  -1  20   1   -0.11    0.16
   0 -20  -1    6.98    1.42
   0  20   1    8.35    0.99
   0  20   1    9.50    1.25
  -1 -20  -1    1.90    0.77
   1  20   1    1.67    0.48
   1  20   1    1.02    0.54
  -2 -20  -1    1.40    0.67
   2  20   1    2.92    0.67
   2  20   1    2.33    0.56
  -3 -20  -1    0.06    0.42
   3  20   1    0.25    0.28
   3  20   1    0.67    0.43
  -4 -20  -1    0.70    0.57
   4  20   1    0.95    0.45
   4  20   1    0.85    0.36
  -5 -20  -1    0.22    0.50
   5  20   1    0.19    0.34
   5  20   1    1.38    0.44
  -6 -20  -1   13.53    2.31
   6  20   1   17.26    1.78
   6  20   1   16.35    1.46
  -7 -20  -1    7.03    1.69
   7  20   1   13.67    1.49
   7  20   1   12.83    1.15
  -8 -20  -1    2.05    0.89
   8  20   1    2.35    0.43
   8  20   1    2.80    0.70
  -9 -20  -1    0.09    0.44
   9  20   1    0.02    0.41
 -10 -20  -1    0.25    0.50
  10  20   1   -0.12    0.43
 -11 -20  -1   -0.38    0.76
  11  20   1    0.38    0.46
 -12 -20  -1    0.33    0.53
  12  20   1    1.38    0.63
 -13 -20  -1    5.22    1.50
  13  20   1    8.41    1.42
 -14 -20  -1   -0.49    0.46
  14  20   1    0.16    0.53
   7 -21  -1    5.58    1.11
  -7  21   1    4.49    0.94
   6 -21  -1   -0.91    0.36
  -6  21   1    0.35    0.64
   5 -21  -1   -0.23    0.46
  -5  21   1    1.37    0.68
   4 -21  -1    0.72    0.85
  -4  21   1    2.28    0.81
   3 -21  -1   -0.20    0.52
  -3  21   1    0.00    0.55
   2 -21  -1   -0.33    0.52
  -2  21   1    0.71    0.19
  -2  21   1   -0.48    0.54
   1 -21  -1    1.08    0.76
  -1  21   1    1.37    0.36
  -1  21   1    1.10    0.60
   0 -21  -1   10.27    1.76
   0  21   1   11.44    1.44
   0  21   1   10.57    1.17
  -1 -21  -1   -0.27    0.39
   1  21   1    0.43    0.50
   1  21   1    0.61    0.32
  -2 -21  -1    1.26    0.74
   2  21   1    2.68    0.71
   2  21   1    1.67    0.49
  -3 -21  -1    1.10    1.18
   3  21   1    1.40    0.53
   3  21   1    1.31    0.46
  -4 -21  -1   10.71    2.01
   4  21   1   17.81    1.71
   4  21   1   15.50    1.49
  -5 -21  -1   -0.10    0.49
   5  21   1    0.43    0.35
   5  21   1    0.85    0.37
  -6 -21  -1    3.42    1.06
   6  21   1    4.82    0.92
   6  21   1    3.62    0.66
  -7 -21  -1    2.03    0.94
   7  21   1    3.16    0.58
   7  21   1    4.43    0.90
  -8 -21  -1    0.28    0.46
   8  21   1   -0.06    0.35
  -9 -21  -1    0.34    0.55
   9  21   1    0.41    0.43
 -10 -21  -1    4.25    1.26
  10  21   1    3.01    0.88
 -11 -21  -1    4.25    .37
  11  21   1    8.46    1.33
 -12 -21  -1   -0.25    0.58
  12  21   1    0.64    0.57
 -13 -21  -1   -0.30    0.42
  13  21   1   -0.34    0.49
   6 -22  -1   -0.03    0.53
  -6  22   1    0.36    0.59
   5 -22  -1    0.75    0.61
  -5  22   1    0.07    0.60
   4 -22  -1   -0.18    0.55
  -4  22   1   -0.20    0.54
   3 -22  -1   11.28    1.68
  -3  22   1    8.28    1.34
   2 -22  -1   -0.22    0.57
  -2  22   1    0.45    0.58
   1 -22  -1    3.84    1.14
  -1  22   1    6.67    0.75
  -1  22   1    4.94    1.02
   0 -22  -1    0.65    0.72
   0  22   1    1.30    0.42
   0  22   1    1.84    0.69
  -1 -22  -1    0.98    0.71
   1  22   1    3.05    0.62
   1  22   1    2.37    0.78
  -2 -22  -1    3.47    1.03
   2  22   1    3.69    0.76
   2  22   1    4.73    0.90
  -3 -22  -1    0.60    0.50
   3  22   1    0.04    0.44
   3  22   1    0.53    0.39
  -4 -22  -1    1.11    0.64
   4  22   1    1.71    0.50
   4  22   1    1.12    0.55
  -5 -22  -1    0.17    0.57
   5  22   1    0.73    0.37
   5  22   1    1.03    0.46
  -6 -22  -1    2.01    0.97
   6  22   1    2.56    0.69
   6  22   1    1.92    0.53
  -7 -22  -1    6.15    1.60
   7  22   1    8.39    0.89
   7  22   1    9.31    1.44
  -8 -22  -1    1.76    0.97
   8  22   1    2.51    0.82
  -9 -22  -1    0.25    0.62
   9  22   1    0.80    0.44
 -10 -22  -1    0.56    0.59
  10  22   1    1.47    0.65
 -11 -22  -1    0.29    0.63
  11  22   1    0.86    0.57
 -12 -22  -1    0.31    0.57
  12  22   1    0.18    0.54
   5 -23  -1    4.80    1.14
  -5  23   1    2.36    0.93
   4 -23  -1    1.27    0.77
  -4  23   1    2.03    0.83
   3 -23  -1    1.28    0.68
  -3  23   1    1.16    0.65
   2 -23  -1    6.97    1.49
  -2  23   1    6.72    1.19
   1 -23  -1   -0.28    0.60
  -1  23   1   -0.11    0.20
  -1  23   1   -0.07    0.59
   0 -23  -1    2.23    0.98
   0  23   1    1.12    0.67
   0  23   1    2.39    0.53
  -1 -23  -1    0.68    0.69
   1  23   1    0.50    0.24
   1  23   1    0.32    0.63
  -2 -23  -1    0.92    0.76
   2  23   1    2.64    0.71
   2  23   1    1.67    0.53
  -3 -23  -1    1.15    0.74
   3  23   1    3.02    0.75
   3  23   1    2.84    0.59
  -4 -23  -1    1.97    0.76
   4  23   1    2.51    0.65
   4  23   1    2.75    0.75
  -5 -23  -1    1.34    0.80
   5  23   1    2.63    0.67
   5  23   1    2.54    0.63
  -6 -23  -1    0.87    0.70
   6  23   1    0.06    0.38
   6  23   1    0.67    0.41
  -7 -23  -1    1.44    0.84
   7  23   1    2.25    0.78
  -8 -23  -1    0.65    0.71
   8  23   1    0.45    0.52
  -9 -23  -1    0.78    0.69
   9  23   1    1.67    0.67
 -10 -23  -1    2.44    0.98
  10  23   1    4.65    0.99
 -11 -23  -1    0.36    0.53
  11  23   1   -0.20    0.50
   3 -24  -1    0.80    0.62
  -3  24   1    1.30    0.69
   2 -24  -1    1.27    0.77
  -2  24   1    1.45    0.64
   1 -24  -1    0.12    0.67
  -1  24   1   -0.45    0.54
   0 -24  -1    1.86    0.91
   0  24   1    3.38    0.92
   0  24   1    3.03    0.63
  -1 -24  -1    0.27    0.54
   1  24   1   -0.07    0.24
   1  24   1    1.28    0.64
  -2 -24  -1    6.10    1.49
   2  24   1    6.16    1.08
   2  24   1    6.09    1.00
  -3 -24  -1   -0.23    0.43
   3  24   1    0.59    0.32
   3  24   1    0.05    0.49
  -4 -24  -1    1.33    0.64
   4  24   1    0.67    0.51
   4  24   1    0.76    0.41
  -5 -24  -1    0.71    0.48
   5  24   1    0.51    0.45
   5  24   1    0.28    0.39
  -6 -24  -1    0.05    0.59
   6  24   1    0.40    0.37
   6  24   1    0.20    0.28
  -7 -24  -1    3.55    1.29
   7  24   1    3.67    0.91
  -8 -24  -1   -0.65    0.55
   8  24   1   -0.33    0.38
  -9 -24  -1   -0.18    0.45
   9  24   1    0.16    0.36
 -10 -24  -1   -0.21    0.48
  10  24   1    0.17    0.33
   2 -25  -1   -0.33    0.47
  -2  25   1    0.58    0.65
   1 -25  -1    0.20    0.65
  -1  25   1    1.20    0.78
   0 -25  -1   -0.83    0.46
   0  25   1   -0.72    0.58
   0  25   1    0.56    0.25
  -1 -25  -1    1.00    0.76
   1  25   1    1.00    0.35
   1  25   1    1.41    0.65
  -2 -25  -1   -0.29    0.55
   2  25   1    0.44    0.58
   2  25   1    0.47    0.28
  -3 -25  -1   -0.33    0.54
   3  25   1    0.45    0.57
   3  25   1    0.42    0.31
  -4 -25  -1    4.36    1.23
   4  25   1    5.41    0.97
   4  25   1    5.51    1.03
  -5 -25  -1   -0.01    0.47
   5  25   1   -0.04    0.41
   5  25   1   -0.10    0.50
  -6 -25  -1    0.90    0.64
   6  25   1    0.19    0.37
  -7 -25  -1   -0.28    0.42
   7  25   1   -0.09    0.31
  -8 -25  -1    1.34    0.79
   8  25   1    2.43    0.63
  -9 -25  -1    0.02    0.50
   9  25   1    0.35    0.48
  -1 -26  -1    3.30    1.14
   1  26   1    6.92    0.83
   1  26   1    5.50    1.10
  -2 -26  -1    1.37    0.82
   2  26   1    0.55    0.34
   2  26   1    1.27    0.60
  -3 -26  -1    0.49    0.52
   3  26   1    0.90    0.40
   3  26   1    0.20    0.53
  -4 -26  -1   -0.14    0.45
   4  26   1   -0.03    0.39
   4  26   1    0.26    0.28
  -5 -26  -1    0.70    0.55
   5  26   1    1.35    0.53
   5  26   1    0.88    0.39
  -6 -26  -1    1.03    0.63
   6  26   1    0.91    0.38
   7  25  -2    0.08    0.34
  -7 -25   2    0.03    0.51
   6  25  -2    3.61    0.82
  -6 -25   2    1.08    0.79
   5  25  -2    4.26    0.92
  -5 -25   2    2.14    0.96
   4  25  -2    2.15    0.61
   4  25  -2    1.13    0.35
  -4 -25   2   -0.03    0.46
   3  25  -2    2.95    0.67
   3  25  -2    1.76    0.66
  -3 -25   2    1.31    0.74
   2  25  -2    2.26    0.53
   2  25  -2    2.48    0.74
  -2 -25   2    1.41    0.79
   1  25  -2    0.28    0.58
   1  25  -2    0.65    0.34
  -1 -25   2    1.00    0.72
   0  25  -2   -0.08    0.56
   0 -25   2    0.22    0.60
   9  24  -2   -0.05    0.41
  -9 -24   2    0.00    0.64
   8  24  -2    2.35    0.67
  -8 -24   2    2.70    1.12
   7  24  -2    4.70    1.00
  -7 -24   2    3.19    1.09
   6  24  -2    0.42    0.47
  -6 -24   2   -0.22    0.48
   5  24  -2    0.33    0.40
  -5 -24   2    0.96    0.57
   4  24  -2    3.67    0.82
   4  24  -2    3.07    0.70
  -4 -24   2    3.38    0.95
   3  24  -2   12.28    1.29
   3  24  -2    8.49    1.25
  -3 -24   2    5.59    1.44
   2  24  -2    7.43    1.25
   2  24  -2    8.92    1.07
  -2 -24   2    5.56    1.46
   1  24  -2   10.33    1.12
   1  24  -2    8.30    1.30
  -1 -24   2    5.75    1.56
   0  24  -2    0.46    0.58
   0  24  -2   -0.19    0.21
   0 -24   2   -0.51    0.44
  -1  24  -2    0.62    0.65
   1 -24   2   -0.98    0.57
  -2  24  -2    1.24    0.73
   2 -24   2    2.02    1.03
  -3  24  -2   -0.87    0.59
   3 -24   2   -0.59    0.45
  10  23  -2    0.42    0.40
 -10 -23   2    0.47    0.63
   9  23  -2    3.28    0.86
  -9 -23   2    2.60    1.02
   8  23  -2   -0.24    0.45
  -8 -23   2    0.74    0.70
   7  23  -2   -0.52    0.43
  -7 -23   2   -0.45    0.45
   6  23  -2    2.02    0.67
  -6 -23   2    0.90    0.67
   5  23  -2    1.44    0.57
   5  23  -2    0.84    0.38
  -5 -23   2    1.43    0.86
   4  23  -2    7.01    1.18
   4  23  -2    5.56    0.94
  -4 -23   2    4.67    1.33
   3  23  -2    2.90    0.77
   3  23  -2    3.46    0.73
  -3 -23   2    1.76    0.83
   2  23  -2    1.57    0.65
   2  23  -2    1.55    0.42
  -2 -23   2    1.79    0.78
   1  23  -2    0.68    0.32
   1  23  -2   -0.27    0.52
  -1 -23   2    0.11    0.59
   0  23  -2    3.70    0.88
   0  23  -2    2.41    0.58
   0 -23   2    1.93    0.84
  -1  23  -2    1.06    0.25
  -1  23  -2    0.98    0.72
   1 -23   2    0.44    0.71
  -2  23  -2   -0.50    0.50
   2 -23   2    0.22    0.61
  -3  23  -2    0.34    0.62
   3 -23   2    0.98    0.59
  -4  23  -2    0.74    0.59
   4 -23   2    0.73    0.65
  11  22  -2    4.19    1.01
 -11 -22   2    3.59    1.29
  10  22  -2   -0.42    0.40
 -10 -22   2    0.44    0.54
   9  22  -2   -0.26    0.49
  -9 -22   2   -0.29    0.56
   8  22  -2    0.41    0.56
  -8 -22   2    1.75    0.71
   7  22  -2    4.68    1.04
  -7 -22   2    4.12    1.31
   6  22  -2    0.14    0.40
  -6 -22   2    0.37    0.70
   5  22  -2   17.39    1.81
   5  22  -2   15.88    1.46
  -5 -22   2   10.99    2.16
   4  22  -2    2.82    0.69
   4  22  -2    3.31    0.76
  -4 -22   2    2.38    0.96
   3  22-2    0.18    0.46
   3  22  -2    0.44    0.28
  -3 -22   2   -0.26    0.48
   2  22  -2    7.07    1.09
   2  22  -2    6.02    1.03
  -2 -22   2    3.92    1.21
   1  22  -2   -0.20    0.24
   1  22  -2    0.88    0.61
  -1 -22   2    0.35    0.70
   0  22  -2    6.76    1.10
   0  22  -2    8.70    0.98
   0 -22   2    5.57    1.42
  -1  22  -2    0.35    0.22
  -1  22  -2    0.52    0.62
   1 -22   2    0.81    0.76
  -2  22  -2    0.90    0.66
   2 -22   2    1.14    0.73
  -3  22  -2   -0.28    0.53
   3 -22   2   -0.69    0.46
  -4  22  -2   -0.03    0.59
   4 -22   2    0.54    0.65
  -5  22  -2   -0.83    0.48
   5 -22   2   -0.36    0.49
  12  21  -2    4.36    1.09
 -12 -21   2    3.06    1.09
  11  21  -2    0.72    0.55
 -11 -21   2   -0.24    0.48
  10  21  -2    2.81    0.86
 -10 -21   2    1.86    0.90
   9  21  -2    0.08    0.42
  -9 -21   2   -0.48    0.43
   8  21  -2    0.85    0.46
  -8 -21   2   -0.71    0.53
   7  21  -2   -0.38    0.31
  -7 -21   2   -0.37    0.49
   6  21  -2    0.39    0.38
   6  21  -2    0.12    0.22
  -6 -21   2   -0.40    0.57
   5  21  -2   13.99    1.53
   5  21  -2   13.47    1.27
  -5 -21   2    8.78    1.86
   4  21  -2   -0.10    0.37
   4  21  -2    0.26    0.26
  -4 -21   2   -0.13    0.50
   3  21  -2    0.17    0.44
   3  21  -2    1.03    0.43
  -3 -21   2    0.73    0.58
   2  21  -2    0.33    0.51
   2  21  -2   -0.27    0.21
  -2 -21   2    0.00    0.57
   1  21  -2   19.00    1.82
   1  21  -2   16.26    1.66
  -1 -21   2   14.75    2.29
   0  21  -2    0.23    0.51
   0  21  -2   -0.23    0.20
   0 -21   2    0.84    0.70
  -1  21  -2   -0.64    0.52
  -1  21  -2   -0.10    0.19
   1 -21   2   -0.17    0.52
  -2  21  -2    0.23    0.54
  -2  21  -2    0.43    0.19
   2 -21   2    0.10    0.65
  -3  21  -2    0.38    0.56
   3 -21   2    0.01    0.47
  -4  21  -2    0.07    0.59
   4 -21   2   -0.30    0.42
  -5  21  -2    3.39    0.90
   5 -21   2    5.94    1.18
  -6  21  -2    6.17    1.14
   6 -21   2    7.27    1.31
  -7  21  -2    0.51    0.66
   7 -21   2    1.16    0.68
  13  20  -2    0.57    0.59
 -13 -20   2    1.36    0.77
  12  20  -2    0.66    0.59
 -12 -20   2    1.07    0.73
  11  20  -2    0.22    0.47
 -11 -20   2   -0.32    0.49
  10  20  -2   -0.77    0.39
 -10 -20   2   -0.10    0.56
   9  20  -2    1.85    0.67
  -9 -20   2    0.67    0.72
   8  20  -2   13.66    1.65
  -8 -20   2   10.82    2.20
   7  20  -2    2.98    0.84
  -7 -20   2    0.63    0.68
   6  20  -2    0.85    0.30
   6  20  -2    0.44    0.40
  -6 -20   2    0.27    0.59
   5  20  -2    2.02    0.47
   5  20  -2    2.06    0.58
  -5 -20   2    1.21    0.81
   4  20  -2    6.53    1.14
   4  20  -2    7.17    0.94
  -4 -20   2    6.82    1.49
   3  20  -2    1.97    0.56
   3  20  -2    1.23    0.47
  -3 -20   2    0.91    0.76
   2  20  -2    0.55    0.46
   2  20  -2    0.10    0.25
  -2 -20   2    0.39    0.55
   1  20  -2    7.58    0.94
   1  20  -2    6.08    0.98
  -1 -20   2    5.27    1.32
   0  20  -2    1.51    0.62
   0  20  -2    2.02    0.50
   0 -20   2    1.68    0.76
  -1  20  -2    1.48    0.67
  -1  20  -2    1.31    0.37
   1 -20   2    1.48    0.78
  -2  20  -2    3.15    0.56
  -2  20  -2    2.88    0.83
   2 -20   2    2.65    0.89
  -3  20  -2    6.20    1.11
   3 -20   2    6.71    1.33
  -4  20  -2    0.81    0.60
   4 -20   2    0.80    0.58
  -5  20  -2    0.02    0.56
   5 -20   2    0.26    0.55
  -6  20  -2    1.89    0.72
   6 -20   2    3.41    0.90
  -7  20  -2    1.16    0.70
   7 -20   2    0.86    0.60
  -8  20  -2   -1.04    0.46
   8 -20   2    0.49    0.55
  14  19  -2   -0.66    0.47
 -14 -19   2   -0.40    0.45
  13  19  -2    1.13    0.65
 -13 -19   2    0.18    0.54
  12  19  -2    6.25    1.24
 -12 -19   2    5.64    1.55
  11  19  -2    6.70    1.28
 -11 -19   2    5.62    1.47
  10  19  -2   17.50    1.95
 -10 -19   2   11.19    2.23
   9  19  -2    0.38    0.52
  -9 -19   2    0.89    0.76
   8  19  -2    1.63    0.56
  -8 -19   2    1.66    0.89
   7  19  -2    2.17    0.39
   7  19  -2    1.84    0.63
  -7 -19   2    2.80    0.94
   6  19  -2   -0.15    0.22
   6  19  -2   -0.20    0.23
  -6 -19   2    0.09    0.52
   5  19  -2    3.27    0.59
   5  19  -2    3.76    0.82
  -5 -19   2    2.06    0.96
   4  19  -2   23.63    2.25
   4  19  -2   22.51    1.84
  -4 -19   2   16.70    2.66
   3  19  -2   -0.08    0.32
   3  19  -2   -0.10    0.28
  -3 -19   2    0.48    0.59
   2  19  -2    0.54    0.39
   2  19  -2    1.74    0.51
  -2 -19   2    1.43    0.67
   1  19  -2    0.02    0.43
   1  19  -2   -0.26    0.24
  -1 -19   2   -0.47    0.42
   0  19  -2   16.01    1.66
   0  19  -2   19.29    1.81
   0 -19   2   17.43    2.11
  -1  19  -2    1.32    0.39
  -1  19  -2    1.58    0.66
   1 -19   2    1.09    0.75
  -2  19  -2    0.29    0.22
  -2  19  -2    0.68    0.63
   2 -19   2    0.48    0.60
  -3  19  -2    0.66    0.20
  -3  19  -2    1.55    0.67
   3 -19   2    0.84    0.62
  -4  19  -2    0.39    0.54
   4 -19   2    0.89    0.61
  -5  19  -2    1.40    0.70
   5 -19   2    1.91    0.78
  -6  19  -2    1.41    0.70
   6 -19   2    3.06    0.87
  -7  19  -2    2.25    0.82
   7 -19   2    2.52    0.79
  -8  19  -2    1.02    0.55
   8 -19   2    1.20    0.59
  -9  19  -2   -0.29    0.33
   9 -19   2    0.19    0.46
  14  18  -2    0.10    0.51
 -14 -18   2    0.83    0.68
  13  18  -2    2.48    0.79
 -13 -18   2    1.05    0.85
  12  18  -2    1.94    0.74
 -12 -18   2    1.51    0.76
  11  18  -2    3.99    0.92
 -11 -18   2    0.79    0.82
  10  18  -2    1.00    0.67
 -10 -18   2    0.91    0.74
   9  18  -2   -0.70    0.47
  -9 -18   2    0.31    0.70
   8  18  -2    1.94    0.59
  -8 -18   2    0.96    0.72
   7  18  -2   16.99    1.85
   7  18  -2   17.02    1.36
  -7 -18   2   13.42    2.39
   6  18  -2    3.14    0.53
   6  18  -2    3.77    0.80
  -6 -18   2    2.35    0.94
   5  18  -2    4.15    0.64
   5  18  -2    3.14    0.74
  -5 -18   2    2.84    0.99
   4  18  -2    1.20    0.40
   4  18  -2    0.70    0.37
  -4 -18   2    0.38    0.52
   3  18  -2   13.76    1.30
   3  18  -2   15.35    1.57
  -3 -18   2   11.15    1.93
   2  18  -2   -0.04    0.24
   2  18  -2   -0.33    0.32
  -2 -18   2    0.15    0.52
   1  18  -2    0.91    0.36
   1  18  -2    1.10    0.49
  -1 -18   2    0.48    0.59
   0  18  -2    1.12    0.50
   0  18  -2    1.46    0.46
   0 -18   2    1.43    0.73
  -1  18  -2    0.83    0.49
  -1  18  -2    0.26    0.26
   1 -18   2    0.00    0.49
  -2  18  -2    5.41    0.96
  -2  18  -2    6.14    0.74
   2 -18   2    5.82    1.25
  -3  18  -2    1.32    0.63
  -3  18  -2    0.95    0.26
   3 -18   2    0.47    0.54
  -4  18  -2    2.86    0.80
   4 -18   2    3.22    0.89
  -5  18  -2   -0.09    0.54
   5 -18   2    0.87    0.55
  -6  18  -2    2.01    0.71
   6 -18   2    3.47    0.90
  -7  18  -2   -0.05    0.54
   7 -18   2    0.54    0.51
  -8  18  -2   -0.27    0.36
   8 -18   2   -0.01    0.49
  -9  18  -2    0.42    0.43
   9 -18   2    1.31    0.59
  15  17  -2    0.95    0.54
 -15 -17   2   -0.07    0.42
 -15 -17   2   -1.13    0.60
  14  17  -2    2.92    0.85
 -14 -17   2    0.58    0.75
 -14 -17   2    1.79    0.91
  13  17  -2    0.76    0.61
 -13 -17   2    0.54    0.62
 -13 -17   2   -0.84    0.55
  12  17  -2   -0.05    0.56
 -12 -17   2    0.04    0.49
 -12 -17   2   -0.80    0.52
  11  17  -2   11.36    1.67
 -11 -17   2   11.00    1.42
 -11 -17   2    6.92    1.66
  10  17  -2    3.00    0.92
 -10 -17   2    2.88    0.76
 -10 -17   2    3.07    1.03
   9  17  -2   11.39    1.63
  -9 -17   2   10.64    1.94
  -9 -17   2    9.49    1.50
   8  17  -2    8.67    1.40
  -8 -17   2    7.63    1.21
  -8 -17   2    6.85    1.55
   7  17  -2    8.20    0.78
   7  17  -2    8.29    1.32
  -7 -17   2    8.35    1.06
  -7 -17   2    6.07    1.53
   6  17  -2    4.41    0.87
   6  17  -2    4.27    0.59
  -6 -17   2    4.13    0.76
  -6 -17   2    4.09    1.17
   5  17  -2   -0.16    0.19
   5  17  -2   -0.36    0.19
  -5 -17   2   -0.18    0.17
  -5 -17   2    0.07    0.54
   4  17  -2    2.66    0.68
   4  17  -2    3.56    0.55
  -4 -17   2    2.47    0.52
  -4 -17   2    1.88    0.74
   3  17  -2    1.43    0.44
   3  17  -2    1.36    0.47
  -3 -17   2    0.59    0.63
  -3 -17   2    2.10    0.44
   2  17  -2    0.44    0.28
   2  17  -2   -0.07    0.31
  -2 -17   2    0.74    0.24
  -2 -17   2   -0.30    0.40
   1  17  -2   12.38    1.33
   1  17  -2   12.21    1.24
  -1 -17   2   12.45    1.27
  -1 -17   2   10.43    1.78
   0  17  -2    0.99    0.33
   0  17  -2    0.83    0.46
   0 -17   2    1.00    0.29
   0 -17   2    0.67    0.52
  -1  17  -2    6.25    0.95
  -1  17  -2    7.32    0.83
   1 -17   2    4.05    1.07
   1 -17   2    6.79    0.79
  -2  17  -2    0.06    0.17
  -2  17  -2   -0.07    0.40
   2 -17   2    0.08    0.50
   2 -17   2    0.60    0.20
  -3  17  -2    3.78    0.79
  -3  17  -2    3.57    0.60
   3 -17   2    4.10    0.75
   3 -17   2    4.20    0.97
  -4  17  -2    0.42    0.54
  -4  17  -2    0.36    0.15
   4 -17   2    0.92    0.60
   4 -17   2    0.38    0.30
  -5  17  -2   -0.54    0.40
   5 -17   2    0.34    0.29
   5 -17   2    0.22    0.51
  -6  17  -2    3.46    0.81
   6 -17   2    3.83    0.85
   6 -17   2    3.31    0.72
  -7  17  -2    1.27    0.67
   7 -17   2    3.23    0.83
  -8  17  -2   -0.27    0.48
  -8  17  -2    0.22    0.91
   8 -17   2    0.20    0.43
  -9  17  -2    1.17    1.03
  -9  17  -2   -1.23    0.41
   9 -17   2   -0.21    0.44
 -10  17  -2    0.98    0.47
  10 -17   2    1.70    0.61
  15  16  -2    2.50    0.82
 -15 -16   2   -0.14    0.81
 -15 -16   2    1.22    0.67
  14  16  -2    6.65    1.25
 -14 -16   2    4.66    1.28
 -14 -16   2    4.02    1.08
  13  16  -2    0.25    0.61
 -13 -16   2   -0.07    0.60
 -13 -16   2    0.45    0.45
  12  16  -2    0.76    0.59
 -12 -16   2   -0.92    0.51
 -12 -16   2    0.09    0.48
  11  16  -2    1.41    0.70
 -11 -16   2    0.80    0.74
 -11 -16   2    0.70    0.67
  10  16  -2   10.87    1.65
 -10 -16   2   10.90    2.04
 -10 -16   2    9.43    1.58
   9  16  -2    0.12    0.44
  -9 -16   2   -0.47    0.39
  -9 -16   2    0.54    0.52
   8  16  -2    0.49    0.51
   8  16  -2    0.30    0.16
  -8 -16   2    0.07    0.48
  -8 -16   2   -0.18    0.45
   7  16  -2    6.90    0.67
   7  16  -2    7.76    1.18
  -7 -16   2    3.91    1.17
  -7 -16   2    6.14    1.05
   6  16  -2    0.15    0.30
   6  16  -2    0.14    0.20
  -6 -16   2   -0.03    0.28
  -6 -16   2   -0.49    0.40
   5  16  -2    0.32    0.24
   5  16  -2    0.67    0.39
  -5 -16   2    0.55    0.53
  -5 -16   2   -0.05    0.23
   4  16  -2   35.69    3.12
   4  16  -2   33.49    2.48
  -4 -16   2   32.51    3.09
  -4 -16   2   30.67    3.20
   3  16  -2   19.08    1.91
   3  16  -2   18.48    1.54
  -3 -16   2   19.08    1.88
  -3 -16   2   16.63    2.05
   2  16  -2   29.40    2.57
   2  16  -2   27.47    2.14
  -2 -16   2   24.35    2.70
  -2 -16   2   26.43    2.56
   1  16  -2   -0.05    0.31
   1  16  -2    0.06    0.25
  -1 -16   2   -0.09    0.36
  -1 -16   2   -0.47    0.21
   0  16  -2    1.67    0.48
   0  16  -2    2.89    0.59
   0 -16   2    2.17    0.77
   0 -16   2    1.67    0.42
  -1  16  -2    0.85    0.34
  -1  16  -2    0.51    0.37
   1 -16   2    0.62    0.32
   1 -16   2    0.80    0.59
  -2  16  -2    0.14    0.38
  -2  16  -2   -0.16    0.14
   2 -16   2    0.16    0.22
   2 -16   2   -0.32    0.44
  -3  16  -2    7.43    0.80
  -3  16  -2    6.89    1.01
   3 -16   2    7.90    1.32
   3 -16   2    7.71    0.97
  -4  16  -2   -0.13    0.09
  -4  16  -2   -0.17    0.33
   4 -16   2   -0.16    0.39
   4 -16   2   -0.26    0.23
  -5  16  -2    0.17    0.44
   5 -16   2    0.04    0.34
   5 -16   2   -0.30    0.44
  -6  16  -2   -0.44    0.42
   6 -16   2   -0.19    0.39
   6 -16   2   -0.29    0.26
  -7  16  -2    7.69    1.13
   7 -16   2    6.66    1.19
   7 -16   2   11.42    1.44
  -8  16  -2   -0.59    0.38
   8 -16   2   -0.04    0.42
  -9  16  -2    1.72    1.11
  -9  16  -2    2.10    0.68
   9 -16   2    2.37    0.71
 -10  16  -2   -0.89    0.38
 -10  16  -2    0.38    1.05
  10 -16   2    0.25    0.46
 -11  16  -2    1.70    0.91
 -11  16  -2    0.01    0.37
  11 -16   2   -0.02    0.40
  15  15  -2    0.36    0.61
 -15 -15   2   -0.62    0.66
 -15 -15   2    0.86    0.72
  14  15  -2    1.31    0.72
 -14 -15   2   -0.18    0.65
 -14 -15   2    0.61    0.58
  13  15  -2    1.02    0.68
 -13 -15   2    0.47    0.54
 -13 -15   2   -0.22    0.66
  12  15  -2    1.55    0.73
 -12 -15   2   -0.31    0.75
 -12 -15   2    0.98    0.57
  11  15  -2    4.40    1.02
 -11 -15   2    3.57    0.99
 -11 -15   2    2.17    0.86
  10  15  -2   22.04    2.17
 -10 -15   2   14.35    2.40
 -10 -15   2   17.65    2.13
   9  15  -2    2.32    0.75
  -9 -15   2    0.63    0.66
  -9 -15   2    2.34    0.76
   8  15  -2    1.31    0.55
   8  15  -2    0.88    0.21
  -8 -15   2    0.82    0.58
  -8 -15   2    0.28    0.64
   7  15  -2   12.72    1.00
   7  15  -2   11.87    1.45
  -7 -15   2   11.33    1.48
  -7 -15   2   10.65    1.84
   6  15  -2   20.50    2.02
   6  15  -2   19.82    1.49
  -6 -15   2   13.88    2.26
  -6 -15   2   19.18    2.01
   5  15  -2    3.54    0.81
   5  15  -2    4.45    0.57
  -5 -15   2    3.61    0.71
  -5 -15   2    2.90    0.87
   4  15  -2    4.66    0.86
   4  15  -2    3.99    0.62
  -4 -15   2    4.59    0.79
  -4 -15   2    4.40    1.05
   3  15  -2   11.02    1.27
   3  15  -2   11.33    1.01
  -3 -15   2   10.44    1.21
  -3 -15   2    8.92    1.61
   2  15  -2    0.08    0.26
   2  15  -2   -0.01    0.27
  -2 -15   2    0.21    0.22
  -2 -15   2    0.00    0.36
   1  15  -2    3.54    0.68
   1  15  -2    4.91    0.68
  -1 -15   2    3.07    0.85
  -1 -15   2    4.47    0.73
   0  15  -2   18.02    1.56
   0  15  -2   17.52    1.74
   0 -15   2   17.98    1.99
   0 -15   2   19.15    1.82
  -1  15  -2    3.52    0.63
  -1  15  -2    3.34    0.61
   1 -15   2    4.10    0.71
   1 -15   2    4.10    0.96
  -2  15  -2    3.87    0.69
  -2  15  -2    4.53    0.58
   2 -15   2    5.15    0.81
   2 -15   2    3.67    0.92
  -3  15  -2    0.07    0.16
  -3  15  -2   -0.02    0.34
   3 -15   2    0.09    0.25
   3 -15   2    0.16    0.43
  -4  15  -2    5.02    0.84
  -4  15  -2    5.23    0.59
   4 -15   2    4.94    0.89
   4 -15   2    5.43    1.00
  -5  15  -2   -0.08    0.35
   5 -15   2   -0.23    0.26
   5 -15   2   -0.02    0.41
  -6  15  -2    0.21    0.43
   6 -15   2    0.48    0.43
   6 -15   2    0.02    0.30
  -7  15  -2    0.57    0.35
   7 -15   2   -0.58    0.36
   7 -15   2   -0.36    0.30
  -8  15  -2    0.38    0.41
   8 -15   2    0.42    0.42
  -9  15  -2   -0.77    0.94
  -9  15  -2    0.42    0.51
   9 -15   2    0.73    0.48
 -10  15  -2   -0.22    0.39
 -10  15  -2   -0.47    0.98
  10 -15   2   -0.30    0.33
 -11  15  -2    2.76    1.19
 -11  15  -2    2.55    0.74
  11 -15   2    3.70    0.83
  16  14  -2    0.83    0.58
 -16 -14   2    0.53    0.91
 -16 -14   2    0.04    0.40
  15  14  -2    2.63    0.80
 -15 -14   2    2.30    1.01
 -15 -14   2    1.91    0.90
  14  14  -2    5.05    1.08
 -14 -14   2    5.58    1.28
 -14 -14   2    2.80    0.92
  13  14  -2   13.07    1.59
 -13 -14   2   11.85    1.81
 -13 -14   2    5.96    1.52
  12  14  -2    0.51    0.69
 -12 -14   2    0.40    0.64
 -12 -14   2    1.09    0.64
  11  14  -2    0.03    0.50
 -11 -14   2    0.04    0.45
 -11 -14   2    0.84    0.72
  10  14  -2    1.95    0.72
 -10 -14   2    1.34    0.78
 -10 -14   2    2.46    0.83
   9  14  -2   33.81    3.09
  -9 -14   2   28.11    3.13
  -9 -14   2   30.94    3.14
   8  14  -2    2.14    0.33
   8  14  -2    2.72    0.76
  -8 -14   2    1.43    0.79
  -8 -14   2    2.47    0.76
   7  14  -2   -0.11    0.13
   7  14  -2   -0.18    0.33
  -7 -14   2    0.68    0.54
  -7 -14   2    0.01    0.40
   6  14  -2    1.09    0.26
   6  14  -2    0.18    0.30
  -6 -14   2    0.54    0.52
  -6 -14   2    0.30    0.39
   5  14  -2    0.19    0.20
   5  14  -2    0.10    0.28
  -5 -14   2    0.36    0.30
  -5 -14   2    0.53    0.48
   4  14  -2    1.64    0.35
   4  14  -2    2.31    0.56
  -4 -14   2    2.50    0.79
  -4 -14   2    1.17    0.39
   3  14  -2   43.41    3.50
   3  14  -2   35.55    2.79
  -3 -14   2   35.24    3.50
  -3 -14   2   40.66    3.54
   2   -2    0.75    0.34
   2  14  -2    0.79    0.30
  -2 -14   2    0.70    0.49
  -2 -14   2    0.21    0.27
   1  14  -2    7.32    0.85
   1  14  -2    5.27    0.75
  -1 -14   2    3.83    0.96
  -1 -14   2    6.69    0.81
   0  14  -2    0.36    0.31
   0  14  -2    0.11    0.18
   0 -14   2    0.35    0.35
   0 -14   2    0.38    0.23
  -1  14  -2   -0.13    0.27
  -1  14  -2    0.33    0.22
   1 -14   2    0.50    0.25
   1 -14   2    0.20    0.36
  -2  14  -2    4.49    0.67
  -2  14  -2    3.96    0.67
   2 -14   2    4.02    0.72
   2 -14   2    4.64    0.94
  -3  14  -2    6.04    0.71
  -3  14  -2    5.39    0.80
   3 -14   2    8.42    1.20
   3 -14   2    7.11    0.88
  -4  14  -2    3.57    0.64
  -4  14  -2    3.60    0.47
   4 -14   2    3.92    0.78
   4 -14   2    4.00    0.82
  -5  14  -2    0.26    0.39
  -5  14  -2    0.07    0.09
   5 -14   2    0.21    0.38
   5 -14   2   -0.23    0.24
  -6  14  -2    7.86    1.07
   6 -14   2    7.67    1.28
   6 -14   2   12.43    1.27
  -7  14  -2    0.53    0.40
   7 -14   2    2.01    0.62
   7 -14   2    0.56    0.43
  -8  14  -2    3.00    0.66
   8 -14   2    2.13    0.64
  -9  14  -2   -0.81    0.91
  -9  14  -2    0.16    0.42
   9 -14   2   -0.26    0.32
 -10  14  -2    0.79    0.46
 -10  14  -2    0.10    0.96
  10 -14   2    1.45    0.56
 -11  14  -2    0.36    0.37
 -11  14  -2   -0.04    1.02
  11 -14   2   -0.37    0.35
 -12  14  -2    0.27    0.41
 -12  14  -2    3.76    1.06
  12 -14   2    0.47    0.43
  16  13  -2    6.29    1.12
 -16 -13   2    5.33    1.40
  15  13  -2    6.49    1.20
 -15 -13   2    4.68    1.24
  14  13  -2    2.54    0.82
 -14 -13   2    3.77    1.09
 -14 -13   2    2.28    0.84
  13  13  -2    0.75    0.68
 -13 -13   2    1.65    0.79
 -13 -13   2    1.00    0.67
  12  13  -2    4.14    1.02
 -12 -13   2    5.42    1.16
 -12 -13   2    4.14    1.22
  11  13  -2    0.53    0.60
 -11 -13   2    0.25    0.60
 -11 -13   2   -0.22    0.50
  10  13  -2    2.49    0.75
 -10 -13   2    2.32    0.86
 -10 -13   2    2.74    0.86
   9  13  -2    8.93    0.71
   9  13  -2   11.85    1.38
  -9 -13   2    8.16    1.35
  -9 -13   2    7.20    1.47
   8  13  -2    0.02    0.11
   8  13  -2    0.17    0.41
  -8 -13   2    0.33    0.52
  -8 -13   2   -0.24    0.35
   7  13  -2    0.10    0.13
   7  13  -2    0.01    0.39
  -7 -13   2   -0.30    0.39
  -7 -13   2    0.25    0.47
   6  13  -2    0.17    0.29
   6  13  -2    0.04    0.15
  -6 -13   2   -0.31    0.32
  -6 -13   2   -0.35    0.32
   5  13  -2   33.24    2.30
   5  13  -2   33.10    2.97
  -5 -13   2   31.65    3.00
  -5 -13   2   27.65    2.97
   4  13  -2    3.03    0.66
   4  13  -2    2.90    0.43
  -4 -13   2    2.82    0.59
  -4 -13   2    2.01    0.73
   3  13  -2    2.38    0.40
   3  13  -2    2.08    0.54
  -3 -13   2    1.95    0.47
  -3 -13   2    1.92    0.69
   2  13  -2   17.43    1.37
   2  13  -2   17.47    1.69
  -2 -13   2   14.68    1.80
  -2 -13   2   17.12    1.70
   1  13  -2    1.76    0.40
   1  13  -2    2.03    0.51
  -1 -13   2    2.04    0.47
  -1 -13   2    1.56    0.64
   0  13  -2   36.66    2.72
   0  13  -2   37.59    3.22
   0 -13   2   35.17    3.28
   0 -13   2   37.71    3.35
  -1  13  -2    0.78    0.33
  -1  13  -2    1.07    0.34
   1 -13   2    0.78    0.31
   1 -13   2    0.69    0.46
  -2  13  -2    5.96    0.68
  -2  13  -2    3.94    0.66
   2 -13   2    6.58    0.80
   2 -13   2    4.75    0.93
  -3  13  -2   15.18    1.35
  -3  13  -2   14.29    1.38
   3 -13   2   18.05    1.67
   3 -13   2   14.58    1.57
  -4  13  -2    2.01    0.35
  -4  13  -2    2.48    0.54
   4 -13   2    2.40    0.65
   4 -13   2    1.75    0.53
  -5  13  -2    0.95    0.46
  -5  13  -2    1.01    0.21
   5 -13   2    0.81    0.45
   5 -13   2    1.11    0.46
  -6  13  -2    0.21    0.30
   6 -13   2    0.66    0.43
   6 -13   2    0.56    0.43
  -7  13  -2    1.85    0.48
   7 -13   2    1.74    0.57
   7 -13   2    1.11    0.60
  -8  13  -2    6.24    0.87
   8 -13   2    7.38    1.27
   8 -13   2    7.25    1.09
  -9  13  -2   -0.56    0.29
   9 -13   2    0.70    0.41
 -10  13  -2    2.27    0.60
 -10  13  -2    0.70    1.07
  10 -13   2    3.41    0.74
 -11  13  -2   -0.39    0.98
 -11  13  -2   -0.01    0.36
  11 -13   2   -0.29    0.38
 -12  13  -2    4.11    1.08
 -12  13  -2    0.44    0.55
  12 -13   2    0.81    0.49
 -13  13  -2   -0.14    0.98
 -13  13  -2   -0.32    0.38
  13 -13   2    0.51    0.48
  16  12  -2    0.19    0.46
  16  12  -2   -0.22    0.54
 -16 -12   2   -0.42    0.74
  15  12  -2    0.32    0.54
  15  12  -2   -0.16    0.51
 -15 -12   2   -0.17    0.70
  14  12  -2   -0.15    0.61
 -14 -12   2    0.13    0.58
  13  12  -2   -0.28    0.53
 -13 -12   2   -0.11    0.49
  12  12  -2    5.16    1.04
 -12 -12   2    4.04    1.01
 -12 -12   2    2.61    0.89
  11  12  -2    0.89    0.58
 -11 -12   2    1.14    0.61
 -11 -12   2    0.25    0.43
  10  12  -2   27.54    2.51
 -10 -12   2   18.19    2.42
 -10 -12   2   24.10    2.50
   9  12  -2    1.75    0.63
   9  12  -2    1.88    0.24
  -9 -12   2    1.74    0.70
  -9 -12   2    2.28    0.79
   8  12  -2   17.41    1.77
   8  12  -2   15.58    1.13
  -8 -12   2   13.08    2.03
  -8 -12   2   14.03    1.73
   7  12  -2    0.02    0.10
   7  12  -2   -0.22    0.29
  -7 -12   2   -0.13    0.34
  -7 -12   2    0.07    0.03
  -7 -12   2   -0.20    0.40
   6  12  -2    0.92    0.44
   6  12  -2    0.82    0.20
  -6 -12   2    0.49    0.54
  -6 -12   2    0.86    0.49
   5  12  -2    0.55    0.18
   5  12  -2    0.78    0.37
  -5 -12   2    0.80    0.41
  -5 -12   2    0.39    0.48
   4  12  -2    1.90    0.31
   4  12  -2    1.54    0.46
  -4 -12   2    2.37    0.76
  -4 -12   2    1.83    0.51
   3  12  -2   15.05    1.47
   3  12  -2   12.75    1.10
  -3 -12   2   13.31    1.61
  -3 -12   2   14.44    1.45
   2  12  -2    1.53    0.34
   2  12  -2    1.47    0.43
  -2 -12   2    1.17    0.58
  -2 -12   2    1.37    0.42
   1  12  -2    1.18    0.32
   1  12  -2    1.70    0.41
  -1 -12   2    1.17    0.53
  -1 -12   2    1.32    0.39
   0  12  -2    2.16    0.49
   0  12  -2    1.13    0.37
   0 -12   2    1.63    0.41
   0 -12   2    1.19    0.54
  -1  12  -2   82.92    7.00
  -1  12  -2   88.43    5.90
   1 -12   2   83.72    7.31
   1 -12   2   87.09    6.78
  -2  12  -2    0.94    0.31
  -2  12  -2    1.04    0.37
   2 -12   2    1.71    0.58
   2 -12   2    1.48    0.44
  -3  12  -2    0.68    0.32
  -3  12  -2    0.15    0.18
   3 -12   2    0.21    0.27
   3 -12   2    0.49    0.40
  -4  12  -2    2.66    0.53
  -4  12  -2    2.68    0.41
   4 -12   2    2.42    0.60
   4 -12   2    3.52    0.69
  -5  12  -2    0.47    0.34
  -5  12  -2    0.47    0.14
   5 -12   2    0.93    0.43
   5 -12   2    0.25    0.37
  -6  12  -2    3.57    0.63
   6 -12   2    3.54    0.42
   6 -12   2    3.95    0.72
   6 -12   2    4.02    0.82
  -7  12  -2    8.49    1.07
   7 -12   2    6.79    1.21
   7 -12   2    9.71    1.07
  -8  12  -2    0.68    0.37
   8 -12   2    2.15    0.61
   8 -12   2    0.72    0.49
  -9  12  -2    3.35    0.65
   9 -12   2    5.49    0.86
 -10  12  -2   -0.72    0.90
 -10  12  -2    0.12    0.28
  10 -12   2    0.09    0.40
 -11  12  -2    1.50    1.12
 -11  12  -2    2.70    0.65
  11 -12   2    3.80    0.77
 -12  12  -2    3.29    1.20
 -12  12  -2    1.51    0.52
  12 -12   2    1.96    0.58
 -13  12  -2    0.60    0.97
 -13  12  -2   -0.37    0.39
  13 -12   2    0.09    0.43
  16  11  -2   -0.60    0.41
  16  11  -2   -0.90    0.48
 -16 -11   2   -0.64    0.69
  15  11  -2    0.17    0.54
  15  11  -2   -0.29    0.58
 -15 -11   2   -0.57    0.63
  14  11  -2   -0.29    0.58
  14  11  -2    0.15    0.58
 -14 -11   2    0.71    0.67
  13  11  -2    6.66    1.40
  13  11  -2    8.03    1.31
 -13 -11   2    8.28    1.52
  12  11  -2    0.10    0.38
  12  11  -2    0.28    0.52
 -12 -11   2    0.37    0.64
  11  11  -2    4.21    0.92
 -11 -11   2    5.50    1.12
  10  11  -2    0.08    0.45
 -10 -11   2    0.37    0.52
 -10 -11   2   -0.40    0.40
   9  11  -2    0.68    0.45
  -9 -11   2    1.08    0.57
  -9 -11   2    0.96    0.61
   8  11  -2    3.19    0.31
   8  11  -2    3.57    0.78
  -8 -11   2    3.28    0.78
  -8 -11   2    2.70    0.22
  -8 -11   2    1.39    0.70
   7  11  -2    0.80    0.42
   7  11  -2    0.33    0.13
  -7 -11   2    0.35    0.06
  -7 -11   2    0.84    0.55
  -7 -11   2    0.75    0.46
   6  11  -2   35.88    2.39
   6  11  -2   38.20    3.19
  -6 -11   2   34.25    3.19
  -6 -11   2   29.91    2.33
  -6 -11   2   36.46    3.23
   5  11  -2    6.65    0.58
   5  11  -2    7.35    1.07
  -5 -11   2    5.12    1.12
  -5 -11   2    6.92    1.03
   4  11  -2    0.80    0.22
   4  11  -2    0.74    0.36
  -4 -11   2    0.30    0.38
  -4 -11   2    0.44    0.32
   3  11  -2    2.06    0.34
   3  11  -2    2.28    0.54
  -3 -11   2    2.14    0.69
  -3 -11   2    1.93    0.48
   2  11  -2   16.54    1.55
   2  11  -2   15.89    1.21
   2  11  -2   13.30    1.47
  -2 -11   2   16.23    1.55
  -2 -11   2   13.72    1.63
   1  11  -2    0.55    0.33
   1  11  -2    0.64    0.25
   1  11  -2    0.77    0.23
  -1 -11   2    0.49    0.48
  -1 -11   2    0.76    0.32
   0  11  -2    0.80    0.28
   0  11  -2    0.57    0.32
   0 -11   2    0.43    0.42
   0 -11   2    0.60    0.31
  -1  11  -2   58.34    4.72
  -1  11  -2   56.58    3.98
   1 -11   2   56.83    4.96
   1 -11   2   54.09    4.62
  -2  11  -2    0.01    0.21
  -2  11  -2   -0.06    0.16
   2 -11   2   -0.08    0.21
   2 -11   2    0.15    0.35
  -3  11  -2    6.00    0.63
  -3  11  -2    4.68    0.67
   3 -11   2    4.85    0.88
   3 -11   2    6.55    0.84
  -4  11  -2   24.85    2.07
  -4  11  -2   26.28    2.27
   4 -11   2   31.13    2.43
   4 -11   2   27.51    2.59
  -5  11  -2   17.42    1.39
  -5  11  -2   17.16    1.39
   5 -11   2   16.29    1.73
   5 -11   2   19.82    1.61
   5 -11   2   12.68    1.40
  -6  11  -2    7.80    0.81
   6 -11   2    6.06    0.65
   6 -11   2    9.14    1.14
   6 -11   2    6.38    0.93
  -7  11  -2    1.95    0.48
   7 -11   2    2.66    0.62
   7 -11   2    1.72    0.60
  -8  11  -2    0.97    0.38
   8 -11   2    1.09    0.48
   8 -11   2    0.32    0.50
  -9  11  -2   -0.18    0.24
   9 -11   2    0.54    0.40
 -10  11  -2   -0.96    0.74
 -10  11  -2    0.25    0.31
  10 -11   2    0.50    0.41
 -11  11  -2    1.72    1.05
 -11  11  -2    0.79    0.39
  11 -11   2    1.66    0.56
 -12  11  -2    0.55    1.00
 -12  11  -2    0.34    0.36
  12 -11   2    0.49    0.47
 -13  11  -2    0.18    0.38
 -13  11  -2    0.09    0.92
  13 -11   2    0.58    0.51
 -14  11  -2   -0.59    0.33
 -14  11  -2   -0.37    0.98
  14 -11   2   -0.41    0.40
  17  10  -2   -0.02    0.49
 -17 -10   2   -0.41    1.00
  16  10  -2   -0.04    0.39
  16  10  -2    0.18    0.61
 -16 -10   2   -1.56    0.63
  15  10  -2    2.39    0.90
  15  10  -2    2.29    0.78
 -15 -10   2    1.94    0.96
  14  10  -2   -0.22    0.53
  14  10  -2    1.03    0.69
 -14 -10   2   -0.75    0.60
  13  10  -2    0.63    0.52
  13  10  -2    0.60    0.57
 -13 -10   2    1.38    0.78
  12  10  -2   -0.07    0.45
  12  10  -2    0.17    0.51
 -12 -10   2    0.29    0.58
  11  10  -2    2.74    0.74
  11  10  -2    2.97    0.81
 -11 -10   2    3.01    0.85
  10  10  -2    0.04    0.36
  10  10  -2   -0.19    0.30
 -10 -10   2    0.53    0.50
   9  10  -2   16.06    1.57
  -9 -10   2   11.47    0.87
  -9 -10   2   13.64    1.54
   8  10  -2    6.55    0.52
   8  10  -2    7.50    1.11
  -8 -10   2    6.15    0.48
  -8 -10   2    7.62    1.12
  -8 -10   2    6.15    1.19
   7  10  -2   34.58    2.97
   7  10  -2   32.46    2.17
  -7 -10   2   34.06    3.02
  -7 -10   2   28.18    2.14
  -7 -10   2   31.50    2.97
   6  10  -2    0.38    0.37
   6  10  -2    0.37    0.13
  -6 -10   2    0.37    0.46
  -6 -10   2    0.27    0.06
  -6 -10   2    0.15    0.37
   5  10  -2   10.67    1.21
   5  10  -2   11.07    0.78
  -5 -10   2   10.15    1.50
  -5 -10   2    8.54    0.71
  -5 -10   2   11.04    1.21
   4  10  -2    4.37    0.77
   4  10  -2    4.27    0.42
  -4 -10   2    4.07    0.73
  -4 -10   2    3.82    0.85
  -4 -10   2    3.93    0.33
   3  10  -2    8.58    0.97
   3  10  -2    7.46    0.65
  -3 -10   2    7.01    0.90
  -3 -10   2    6.52    1.13
   2  10  -2   52.38    3.52
   2  10  -2   57.34    4.37
   2  10  -2   45.19    4.40
  -2 -10   2   46.59    4.21
  -2 -10   2   52.36    4.46
   1  10  -2    0.98    0.32
   1  10  -2    1.32    0.40
   1  10  -2    0.66    0.24
  -1 -10   2    0.99    0.37
  -1 -10   2    0.64    0.52
   0  10  -2   14.57    1.07
   0  10  -2   10.51    1.24
   0  10  -2   12.56    1.26
   0 -10   2   13.59    1.44
   0 -10   2   13.08    1.33
  -1  10  -2   13.56    1.17
  -1  10  -2   15.19    1.36
   1 -10   2   14.68    1.47
   1 -10   2   12.53    1.48
  -2  10  -2   28.06    2.41
  -2  10  -2   28.51    2.10
   2 -10   2   28.23    2.61
   2 -10   2   27.52    2.48
  -3  10  -2    1.41    0.30
  -3  10  -2    2.28    0.42
   3 -10   2    2.01    0.53
   3 -10   2    0.95    0.42
  -4  10  -2    0.03    0.10
  -4  10  -2   -0.01    0.21
   4 -10   2   -0.05    0.25
   4 -10   2    0.01    0.26
   4 -10   2   -0.10    0.12
  -5  10  -2    3.76    0.57
  -5  10  -2    4.11    0.41
   5 -10   2    5.14    0.85
   5 -10   2    2.83    0.47
   5 -10   2    3.88    0.70
  -6  10  -2   -0.05    0.21
   6 -10   2    0.16    0.34
   6 -10   2    0.07    0.27
  -7  10  -2    1.60    0.42
   7 -10   2    2.09    0.49
   7 -10   2    0.90    0.49
  -8  10  -2   15.65    1.41
   8 -10   2   15.46    1.54
   8 -10   2   17.18    1.88
  -9  10  -2    2.30    0.53
   9 -10   2    3.95    0.68
 -10  10  -2   -0.46    0.79
 -10  10  -2    0.16    0.25
  10 -10   2    0.15    0.35
 -11  10  -2    0.27    0.90
 -11  10  -2    0.27    0.41
  11 -10   2    0.86    0.50
 -12  10  -2    1.44    0.49
 -12  10  -2    2.42    1.13
  12 -10   2    1.93    0.63
 -13  10  -2    1.55    1.02
 -13  10  -2   -0.01    0.33
  13 -10   2    0.44    0.42
 -14  10  -2    0.65    0.44
 -14  10  -2    1.88    1.15
  14 -10   2    0.10    0.43
  17   9  -2    0.15    0.57
 -17  -9   2   -0.38    0.94
  16   9  -2   -0.03    0.59
 -16  -9   2    0.30    0.88
  15   9  -2    2.50    0.76
  15   9  -2    1.98    0.84
 -15  -9   2    2.69    0.99
  14   9  -2    1.58    0.71
  14   9  -2   -0.50    0.47
 -14  -9   2   -0.05    0.61
  13   9  -2    0.13    0.53
  13   9  -2   -0.12    0.44
 -13  -9   2    0.26    0.56
  12   9  -2    7.75    1.23
  12   9  -2    6.18    1.24
 -12  -9   2    6.81    1.27
  11   9  -2    0.16    0.39
  11   9  -2    0.49    0.53
 -11  -9   2    0.53    0.54
  10   9  -2    4.25    0.86
  10   9  -2    3.40    0.85
 -10  -9   2    3.09    0.83
 -10  -9   2    3.40    0.27
   9   9  -2    1.50    0.60
   9   9  -2    1.14    0.50
  -9  -9   2    1.41    0.58
   8   9  -2    0.35    0.41
  -8  -9   2    0.49    0.42
   7   9  -2    0.65    0.43
   7   9  -2    0.79    0.15
  -7  -9   2    0.94    0.55
  -7  -9   2    0.66    0.11
  -7  -9   2    0.17    0.36
   6   9  -2   -0.06    0.29
   6   9  -2   -0.02    0.08
  -6  -9   2    0.33    0.45
  -6  -9   2    0.08    0.05
  -6  -9   2    0.53    0.36
   5   9  -2    0.09    0.31
   5   9  -2    0.18    0.11
  -5  -9   2    0.43    0.37
  -5  -9   2    0.20    0.38
  -5  -9   2    0.08    0.06
   4   9  -2    2.61    0.57
   4   9  -2    1.94    0.27
  -4  -9   2    1.82    0.20
  -4  -9   2    2.48    0.54
  -4  -9   2    1.83    0.64
   3   9  -2    1.13    0.23
   3   9  -2    0.88    0.38
   3   9  -2    0.62    0.26
  -3  -9   2    1.17    0.11
  -3  -9   2    0.95    0.37
  -3  -9   2    0.41    0.42
   2   9  -2    1.41    0.43
   2   9  -2    1.51    0.26
   2   9  -2    1.40    0.35
  -2  -9   2    1.14    0.36
  -2  -9   2    0.88    0.45
   1   9  -2   15.78    1.23
   1   9  -2   14.67    1.57
   1   9  -2   18.10    1.58
  -1  -9   2   16.58    1.68
  -1  -9   2   17.13    1.62
   0   9  -2    3.13    0.53
   0   9  -2    3.35    0.43
   0   9  -2    2.55    0.49
   0  -9   2    2.84    0.68
   0  -9   2    2.55    0.52
  -1   9  -2    3.59    0.50
  -1   9  -2    3.73    0.62
  -1   9  -2    4.36    0.60
   1  -9   2    4.70    0.70
   1  -9   2    4.55    0.83
  -2   9  -2   58.19    4.82
  -2   9  -2   55.79    4.08
   2  -9   2   62.42    5.13
   2     2   59.29    4.67
  -3   9  -2    0.23    0.14
  -3   9  -2   -0.12    0.20
   3  -9   2    0.11    0.13
   3  -9   2    0.40    0.30
   3  -9   2    0.08    0.30
  -4   9  -2    6.35    0.60
  -4   9  -2    6.12    0.66
   4  -9   2    6.20    0.96
   4  -9   2    5.39    0.66
   4  -9   2    7.75    0.82
  -5   9  -2    5.47    0.67
  -5   9  -2    5.51    0.48
   5  -9   2    3.65    0.54
   5  -9   2    6.61    0.97
   5  -9   2    5.99    0.81
  -6   9  -2   12.32    1.14
   6  -9   2   15.04    1.54
   6  -9   2   11.51    1.22
  -7   9  -2    5.29    0.74
   7  -9   2    7.26    0.77
   7  -9   2    3.54    0.86
  -8   9  -2    1.91    0.44
   8  -9   2    1.45    0.62
   8  -9   2    2.83    0.57
  -9   9  -2    2.76    0.57
   9  -9   2    3.38    0.67
 -10   9  -2    0.23    0.30
 -10   9  -2   -1.32    0.62
  10  -9   2    0.02    0.32
 -11   9  -2    1.02    0.40
 -11   9  -2    0.16    0.77
  11  -9   2    1.66    0.54
 -12   9  -2    1.22    0.42
 -12   9  -2    2.41    1.12
  12  -9   2    2.18    0.63
 -13   9  -2    2.16    0.51
  13  -9   2    2.55    0.70
 -14   9  -2   -0.37    0.83
 -14   9  -2    0.33    0.32
  14  -9   2   -0.27    0.45
  17   8  -2    0.53    0.60
 -17  -8   2    0.31    0.90
  16   8  -2    1.75    0.76
 -16  -8   2    1.56    1.00
  15   8  -2    2.42    0.87
  15   8  -2    2.72    0.79
 -15  -8   2    3.73    1.16
  14   8  -2    0.56    0.49
  14   8  -2    1.25    0.64
 -14  -8   2    0.71    0.76
  13   8  -2    0.06    0.50
  13   8  -2    0.23    0.49
 -13  -8   2    0.47    0.52
  12   8  -2   -0.06    0.44
  12   8  -2   -0.10    0.43
 -12  -8   2   -0.32    0.43
  11   8  -2    2.24    0.67
  11   8  -2    0.76    0.51
 -11  -8   2    1.60    0.65
  10   8  -2    0.39    0.36
  10   8  -2    0.25    0.39
 -10  -8   2    0.27    0.07
 -10  -8   2    0.16    0.43
   9   8  -2   14.85    1.46
   9   8  -2   11.10    1.55
  -9  -8   2   10.38    0.82
  -9  -8   2   12.28    0.84
  -9  -8   2   13.58    1.49
   8   8  -2   16.90    1.66
   8   8  -2   12.84    1.54
  -8  -8   2   14.90    1.63
  -8  -8   2   14.86    1.04
   7   8  -2   -0.10    0.30
   7   8  -2    0.02    0.34
  -7  -8   2    0.07    0.34
  -7  -8   2    0.10    0.05
   6   8  -2    5.88    0.90
   6   8  -2    4.86    0.39
  -6  -8   2    5.06    0.96
  -6  -8   2    4.49    0.37
  -6  -8   2    5.55    0.84
   5   8  -2    5.43    0.43
   5   8  -2    5.72    0.88
  -5  -8   2    5.11    0.82
  -5  -8   2    4.65    0.39
  -5  -8   2    5.56    1.01
   4   8  -2   21.05    1.47
   4   8  -2   23.54    2.03
  -4  -8   2   22.80    2.03
  -4  -8   2   18.92    1.44
  -4  -8   2   20.59    2.03
   3   8  -2   10.00    0.74
   3   8  -2   10.07    1.00
   3   8  -2    9.73    1.07
  -3  -8   2    9.63    1.06
  -3  -8   2    9.27    0.70
  -3  -8   2    8.18    1.20
   2   8  -2    3.45    0.37
   2   8  -2    4.17    0.60
   2   8  -2    4.49    0.65
  -2  -8   2    3.02    0.66
  -2  -8   2    3.79    0.60
  -2  -8   2    3.46    0.30
   1   8  -2   66.13    5.20
   1   8  -2   62.24    4.25
   1   8  -2   61.02    5.36
  -1  -8   2   64.12    5.36
  -1  -8   2   57.39    4.94
   0   8  -2   27.50    2.78
   0   8  -2   35.52    2.71
   0   8  -2   32.38    2.22
   0  -8   2   32.14    2.81
   0  -8   2   27.99    2.64
  -1   8  -2   30.67    3.25
  -1   8  -2   37.95    3.12
  -1   8  -2   40.56    2.63
   1  -8   2   37.41    3.30
   1  -8   2   40.37    3.11
  -2   8  -2    9.62    0.87
  -2   8  -2    8.70    0.79
   2  -8   2    8.15    1.08
   2  -8   2    7.84    0.88
   2  -8   2    9.61    1.02
  -3   8  -2   12.27    1.04
  -3   8  -2   11.64    0.99
   3  -8   2   11.50    1.26
   3  -8   2    9.81    1.10
   3  -8   2   13.52    1.21
  -4   8  -2    0.77    0.27
  -4   8  -2    0.62    0.16
   4  -8   2    0.52    0.23
   4  -8   2    0.63    0.35
   4  -8   2    1.35    0.39
  -5   8  -2   13.65    1.14
   5  -8   2   14.25    1.28
   5  -8   2   12.56    1.47
  -6   8  -2    0.67    0.26
   6  -8   2    0.15    0.24
   6  -8   2    0.66    0.40
  -7   8  -2    3.49    0.56
   7  -8   2    3.78    0.64
   7  -8   2    4.31    0.85
  -8   8  -2    0.74    0.31
   8  -8   2    0.51    0.44
   8  -8   2    0.99    0.38
  -9   8  -2    1.86    0.48
   9  -8   2    3.02    0.62
 -10   8  -2    2.24    0.51
 -10   8  -2    2.33    1.01
  10  -8   2    2.92    0.62
 -11   8  -2    3.09    0.60
 -11   8  -2    1.33    0.98
  11  -8   2    3.79    0.75
 -12   8  -2    0.02    0.92
 -12   8  -2    0.28    0.37
  12  -8   2   -0.30    0.37
 -13   8  -2    3.89    0.64
 -13   8  -2    5.54    1.33
  13  -8   2    3.40    0.84
 -14   8  -2   -0.11    0.96
 -14   8  -2   -0.81    0.20
  14  -8   2   -0.27    0.36
 -15   8  -2   -0.25    0.93
  15  -8   2   -0.04    0.44
  17   7  -2    0.74    0.60
 -17  -7   2    3.83    1.31
  16   7  -2    2.35    0.85
 -16  -7   2    1.79    1.11
  15   7  -2   -0.03    0.57
  15   7  -2   -0.45    0.33
 -15  -7   2   -0.09    0.69
  14   7  -2    1.10    0.67
  14   7  -2    0.76    0.58
 -14  -7   2    1.56    0.76
  13   7  -2    3.76    1.04
  13   7  -2    6.30    1.05
 -13  -7   2    5.42    1.18
  12   7  -2    1.08    0.62
  12   7  -2    1.37    0.59
 -12  -7   2    1.50    0.67
  11   7  -2    1.04    0.54
  11   7  -2    0.85    0.50
 -11  -7   2    0.97    0.13
 -11  -7   2    0.38    0.53
  10   7  -2    2.88    0.78
  10   7  -2    3.62    0.82
 -10  -7   2    3.04    0.27
 -10  -7   2    3.31    0.80
   9   7  -2    0.41    0.40
   9   7  -2   -0.11    0.31
  -9  -7   2    0.14    0.08
  -9  -7   2    0.39    0.08
  -9  -7   2    0.50    0.37
   8   7  -2   19.93    1.87
   8   7  -2   15.14    1.72
  -8  -7   2   18.42    1.88
  -8  -7   2   17.99    1.25
   7   7  -2    0.32    0.35
   7   7  -2    0.14    0.35
  -7  -7   2   -0.01    0.31
  -7  -7   2    0.40    0.08
   6   7  -2    2.42    0.23
   6   7  -2    2.54    0.62
   6   7  -2    1.90    0.58
  -6  -7   2    2.13    0.21
  -6  -7   2    3.07    0.60
   5   7  -2    2.14    0.21
   5   7  -2    2.60    0.57
  -5  -7   2    1.86    0.61
  -5  -7   2    1.68    0.18
  -5  -7   2    1.71    0.46
   4   7  -2    5.71    0.42
   4   7  -2    5.89    0.83
  -4  -7   2    5.38    0.92
  -4  -7   2    5.39    0.77
  -4  -7   2    4.63    0.39
   3   7  -2   14.52    1.34
   3   7  -2   13.51    1.26
   3   7  -2   12.66    0.93
  -3  -7   2   13.27    1.33
  -3  -7   2   12.78    1.34
  -3  -7   2   12.09    0.91
   2   7  -2   32.81    2.23
   2   7  -2   30.92    2.85
   2   7  -2   35.29    2.84
  -2  -7   2   32.41    2.88
  -2  -7   2   31.11    2.20
   1   7  -2    3.85    0.57
   1   7  -2    3.27    0.34
   1   7  -2    3.74    0.56
  -1  -7   2    3.90    0.56
  -1  -7   2    3.18    0.28
  -1  -7   2    2.92    0.63
   0   7  -2   15.01    1.28
   0   7  -2   12.72    1.31
   0   7  -2   13.14    1.02
   0  -7   2   11.54    1.29
   0  -7   2   14.35    1.33
  -1   7  -2    1.87    0.29
  -1   7  -2    2.10    0.36
  -1   7  -2    1.55    0.34
   1  -7   2    2.14    0.47
   1  -7   2    2.42    0.43
   1  -7   2    1.42    0.31
  -2   7  -2   17.28    1.49
  -2   7  -2   18.22    1.30
   2  -7   2   17.53    1.66
   2  -7   2   18.80    1.57
   2  -7   2   14.56    1.51
  -3   7  -2   19.67    1.53
  -3   7  -2   18.96    1.39
   3  -7   2   17.06    1.56
   3  -7   2   20.55    1.79
   3  -7   2   14.34    1.58
  -4   7  -2    2.06    0.36
  -4   7  -2    1.54    0.23
   4  -7   2    1.38    0.31
   4  -7   2    1.65    0.48
   4  -7   2    1.97    0.42
  -5   7  -2    1.61    0.36
   5  -7   2    1.67    0.53
   5  -7   2    1.99    0.42
  -6   7  -2    0.83    0.26
   6  -7   2    0.75    0.29
   6  -7   2    0.50    0.41
  -7   7  -2   16.22    1.29
   7  -7   2   13.99    1.38
   7  -7   2   15.98    1.71
  -8   7  -2    2.81    0.49
   8  -7   2    3.55    0.59
   8  -7   2    2.24    0.68
  -9   7  -2    0.86    0.30
   9  -7   2    0.94    0.40
 -10   7  -2    5.52    0.74
 -10   7  -2    3.51    1.09
  10  -7   2    5.63    0.87
 -11   7  -2    0.09    0.77
 -11   7  -2   -0.34    0.22
  11  -7   2    0.07    0.32
 -12   7  -2    3.90    1.19
 -12   7  -2    1.40    0.41
  12  -7   2    1.04    0.51
 -13   7  -2    1.36    0.80
 -13   7  -2   -0.02    0.23
  13  -7   2   -0.10    0.46
 -14   7  -2   -0.19    0.26
 -14   7  -2    0.85    0.96
  14  -7   2    0.04    0.44
 -15   7  -2    0.36    0.37
 -15   7  -2    0.19    0.86
  15  -7   2    0.75    0.57
  17   6  -2    0.75    0.66
 -17  -6   2    1.51    1.00
  16   6  -2    0.26    0.52
 -16  -6   2    2.34    1.31
  15   6  -2    2.90    0.89
 -15  -6   2    4.18    1.19
  14   6  -2   -0.04    0.47
  14   6  -2   -0.02    0.60
 -14  -6   2   -0.03    0.57
  13   6  -2    0.20    0.48
  13   6  -2   -0.23    0.47
 -13  -6   2   -0.04    0.48
  12   6  -2    1.04    0.57
  12   6  -2    0.46    0.50
 -12  -6   2    0.82    0.62
  11   6  -2    1.27    0.56
  11   6  -2    0.68    0.51
 -11  -6   2    1.10    0.60
 -11  -6   2    0.97    0.15
  10   6  -2   -0.03    0.34
  10   6  -2   -0.10    0.29
 -10  -6   2   -0.05    0.04
 -10  -6   2   -0.10    0.09
 -10  -6   2    0.48    0.41
   9   6  -2    6.41    1.07
   9   6  -2    7.08    1.07
  -9  -6   2    5.54    1.00
  -9  -6   2    7.05    0.52
  -9  -6   2    7.16    0.52
   8   6  -2    9.12    1.13
   8   6  -2   11.48    1.23
  -8  -6   2   10.23    0.71
  -8  -6   2    8.80    0.69
  -8  -6   2   10.58    1.21
   7   6  -2    7.20    1.05
   7   6  -2    7.06    1.05
  -7  -6   2    6.83    0.50
  -7  -6   2    6.40    0.97
   6   6  -2    1.60    0.51
   6   6  -2    1.53    0.52
  -6  -6   2    1.56    0.47
   5   6  -2   87.03    6.74
   5   6  -2   74.47    6.20
  -5  -6   2   80.33    6.88
   4   6  -2   20.19    1.74
   4   6  -2   18.57    1.23
  -4  -6   2   17.40    1.71
  -4  -6   2   15.96    1.21
  -4  -6   2   19.98    1.73
   3   6  -2    5.76    0.74
   3   6  -2    4.65    0.53
   3   6  -2    4.28    0.35
  -3  -6   2    4.81    0.76
  -3  -6   2    5.14    0.69
  -3  -6   2    3.73    0.33
   2   6  -2    8.38    0.85
   2   6  -2    8.00    0.60
   2   6  -2    8.70    0.88
  -2  -6   2    7.71    0.86
  -2  -6   2    7.63    0.58
  -2  -6   2    7.26    0.88
   1   6  -2    2.72    0.45
   1   6  -2    1.90    0.25
   1   6  -2    2.21    0.41
  -1  -6   2    1.66    0.43
  -1  -6   2    1.79    0.35
  -1  -6   2    2.01    0.40
  -1  -6   2    2.12    0.20
   0   6  -2   10.23    0.76
   0   6  -2    9.50    1.00
   0   6  -2   12.62    1.00
   0  -6   2    8.50    0.98
   0  -6   2    9.50    0.96
   0  -6   2    9.78    1.01
   0  -6   2    9.29    0.72
  -1   6  -2   24.17    1.65
  -1   6  -2   20.66    2.07
  -1   6  -2   26.13    1.99
   1  -6   2   22.36    1.95
   1  -6   2   20.37    1.99
   1  -6   2   24.60    2.11
  -2   6  -2   29.34    2.93
  -2   6  -2   34.57    2.76
  -2   6  -2   36.52    2.36
   2  -6   2   35.54    2.69
   2  -6   2   35.95    2.98
   2  -6   2   28.88    2.78
  -3   6  -2    5.79    0.56
  -3   6  -2    7.16    0.58
   3  -6   2    4.75    0.62
   3  -6   2    4.92    0.64
   3  -6   2    6.97    0.78
  -4   6  -2   20.39    1.58
  -4   6  -2   19.73    1.46
   4  -6   2   22.49    1.94
   4  -6   2   15.73    1.64
   4  -6   2   19.77    1.63
  -5   6  -2    0.70    0.24
   5  -6   2    0.36    0.34
   5  -6   2    0.79    0.28
  -6   6  -2   20.73    1.54
   6  -6   2   17.19    1.98
   6  -6   2   21.28    1.70
  -7   6  -2    0.39    0.23
   7  -6   2   -0.21    0.30
   7  -6   2   -0.16    0.20
  -8   6  -2    0.44    0.44
   8  -6   2    0.45    0.39
   8  -6   2    0.17    0.22
  -9   6  -2    1.75    0.38
   9  -6   2    1.69    0.45
 -10   6  -2    2.07    0.44
 -10   6  -2    0.55    0.79
  10  -6   2    1.16    0.46
 -11   6  -2   -0.12    0.75
 -11   6  -2    0.89    0.33
  11  -6   2   -0.25    0.28
 -12   6  -2    0.70    0.35
 -12   6  -2    0.60    0.89
  12  -6   2    0.25    0.47
 -13   6  -2    1.91    0.46
 -13   6  -2    2.42    0.95
  13  -6   2    1.57    0.62
 -14   6  -2   -0.24    0.21
 -14   6  -2    0.15    0.87
  14  -6   2   -0.23    0.40
 -15   6  -2   -0.46    0.22
 -15   6  -2   -0.56    0.97
  15  -6   2   -0.49    0.55
  17   5  -2    0.48    0.61
 -17  -5   2    0.71    0.85
  16   5  -2    0.04    0.51
 -16  -5   2    0.40    0.93
  15   5  -2   -0.83    0.41
 -15  -5   2   -0.51    0.73
  14   5  -2    0.22    0.64
  14   5  -2   -0.32    0.33
 -14  -5   2   -0.80    0.53
  13   5  -2    0.11    0.50
  13   5  -2    0.35    0.48
 -13  -5   2    0.97    0.66
  12   5  -2    6.01    1.11
  12   5  -2    7.08    1.06
 -12  -5   2    5.91    1.16
  11   5  -2    9.51    1.38
  11   5  -2   10.86    1.25
 -11  -5   2   10.18    1.35
 -11  -5   2    8.86    0.72
  10   5  -2   -0.03    0.27
  10   5  -2   -0.43    0.31
 -10  -5   2    0.41    0.39
 -10  -5   2    0.00    0.10
   9   5  -2    0.03    0.29
   9   5  -2    0.44    0.37
  -9  -5   2    0.14    0.04
  -9  -5   2    0.10    0.08
  -9  -5   2    0.24    0.34
   8   5  -2   10.98    1.21
   8   5  -2   12.15    1.30
  -8  -5   2   11.69    1.32
  -8  -5   2   11.19    0.80
  -8  -5   2   10.47    0.79
   7   5  -2   22.28    1.97
   7   5  -2   17.25    1.78
  -7  -5   2   19.43    1.95
  -7  -5   2   19.17    1.34
  -7  -5   2   20.13    1.35
   6   5  -2   11.23    1.28
   6   5  -2   15.30    1.44
  -6  -5   2   14.89    1.39
  -6  -5   2   13.35    0.90
  -6  -5   2   11.64    0.88
   5   5  -2   18.59    1.80
   5   5  -2   21.44    1.97
  -5  -5   2   21.77    1.97
   4   5  -2    4.82    0.72
   4   5  -2    4.51    0.71
  -4  -5   2    4.57    0.61
   3   5  -2    1.91    0.42
   3   5  -2    1.01    0.26
   3   5  -2    1.35    0.15
  -3  -5   2    1.19    0.34
  -3  -5   2    1.65    0.44
  -3  -5   2    1.43    0.13
   2   5  -2    0.04    0.07
   2   5  -2    0.04    0.19
   2   5  -2    0.00    0.15
  -2  -5   2    0.08    0.20
  -2  -5   2    0.02    0.04
  -2  -5   2   -0.01    0.21
  -2  -5   2   -0.06    0.07
   1   5  -2   89.53    7.01
   1   5  -2   98.02    7.80
   1   5  -2   93.90    6.19
   1   5  -2   95.27    7.56
  -1  -5   2   88.34    6.17
  -1  -5   2   88.06    7.01
  -1  -5   2   95.50    7.80
   0   5  -2   34.00    3.11
   0   5  -2   32.32    2.83
   0   5  -2   38.18    2.45
   0   5  -2   38.86    3.01
   0  -5   2   31.99    2.99
   0  -5   2   38.25    3.13
   0  -5   2   36.12    2.87
   0  -5   2   35.44    2.43
  -1   5  -2    2.87    0.45
  -1   5  -2    2.39    0.40
  -1   5  -2    2.98    0.31
   1  -5   2    2.56    0.48
   1  -5   2    3.24    0.45
   1  -5   2    3.47    0.51
   1  -5   2    2.75    0.25
  -2   5  -2    5.00    0.42
  -2   5  -2    3.89    0.44
  -2   5  -2    3.83    0.51
   2  -5   2    5.73    0.55
   2  -5   2    4.69    0.57
   2  -5   2    3.98    0.48
  -3   5  -2    0.62    0.16
  -3   5  -2    0.47    0.12
   3  -5   2    0.95    0.24
   3  -5   2    0.34    0.22
   3  -5   2    0.41    0.16
  -4   5  -2   13.17    1.05
   4  -5   2   14.56    1.19
   4  -5   2   12.95    1.38
  -5   5  -2    1.04    0.26
   5  -5   2    0.99    0.29
   5  -5   2    0.87    0.43
  -6   5  -2   29.19    2.22
   6  -5   2   30.16    2.90
   6  -5   2   33.36    2.49
  -7   5  -2    0.33    0.18
   7  -5   2    0.09    0.20
   7  -5   2    0.02    0.28
  -8   5  -2    3.05    0.45
   8  -5   2    2.19    0.47
   8  -5   2    3.69    0.75
  -9   5  -2   -0.28    0.15
   9  -5   2   -0.08    0.24
 -10   5  -2    1.29    0.35
 -10   5  -2    0.25    0.62
  10  -5   2    1.29    0.45
 -11   5  -2    0.75    0.79
 -11   5  -2    1.95    0.43
  11  -5   2    2.01    0.60
 -12   5  -2    1.67    0.43
 -12   5  -2    0.88    0.93
  12  -5   2    1.69    0.57
 -13   5  -2    0.37    0.29
 -13   5  -2    0.22    0.83
  13  -5   2   -0.51    0.40
 -14   5  -2    0.87    0.88
  14  -5   2   -0.49    0.42
 -15   5  -2    1.02    0.97
 -15   5  -2    0.51    0.28
  15  -5   2    0.40    0.43
 -16   5  -2   -0.19    0.95
 -16   5  -2   -0.39    0.24
  16  -5   2    0.04    0.47
  17   4  -2   -0.17    0.50
 -17  -4   2   -0.46    0.66
  16   4  -2    0.31    0.57
 -16  -4   2    0.58    0.90
  15   4  -2    0.54    0.59
 -15  -4   2    0.62    0.79
  14   4  -2    4.78    1.15
  14   4  -2    5.41    0.87
 -14  -4   2    5.35    1.25
  13   4  -2    0.37    0.45
  13   4  -2    0.13    0.52
 -13  -4   2    1.23    0.64
  12   4  -2    0.92    0.48
  12   4  -2    0.44    0.47
 -12  -4   2    0.39    0.12
 -12  -4   2    1.00    0.58
  11   4  -2    0.05    0.39
  11   4  -2    0.21    0.43
 -11  -4   2    0.81    0.52
 -11  -4   2    0.29    0.12
  10   4  -2    5.36    0.90
  10   4  -2    6.47    0.95
 -10  -4   2    4.78    0.44
 -10  -4   2    5.27    0.96
   9   4  -2    5.88    0.93
   9   4  -2    5.97    0.93
  -9  -4   2    5.20    0.48
  -9  -4   2    6.81    0.46
  -9  -4   2    4.38    0.91
   8   4  -2    6.45    0.95
   8   4  -2    4.44    0.81
  -8  -4   2    6.20    0.46
  -8  -4   2    5.72    0.46
  -8  -4   2    5.66    0.93
   7   4  -2    5.64    0.89
   7   4  -2    7.02    1.00
  -7  -4   2    6.36    0.51
  -7  -4   2    8.00    0.95
  -7  -4   2    7.11    0.52
   6   4  -2   14.65    1.36
   6   4  -2   14.57    1.46
  -6  -4   2   15.58    1.46
  -6  -4   2   12.29    0.95
  -6  -4   2   14.64    0.97
   5   4  -2    0.27    0.27
   5   4  -2    0.12    0.24
  -5  -4   2    0.57    0.25
   4   4  -2   26.10    2.18
   4   4  -2   25.65    2.36
  -4  -4   2   27.58    2.39
   3   4  -2    5.04    0.61
   3   4  -2    5.67    0.61
   3   4  -2    5.96    0.71
  -3  -4   2    5.44    0.66
  -3  -4   2    6.02    0.57
  -3  -4   2    4.83    0.59
   2   4  -2    7.66    0.54
   2   4  -2    7.28    0.78
   2   4  -2    7.32    0.84
  -2  -4   2    8.35    0.84
  -2  -4   2    7.26    0.53
  -2  -4   2    7.51    0.82
  -2  -4   2    7.04    0.79
   1   4  -2    6.68    0.73
   1   4  -2    6.46    0.48
   1   4  -2    6.60    0.72
   1   4  -2    6.80    0.70
  -1  -4   2    5.76    0.69
  -1  -4   2    5.99    0.71
  -1  -4   2    6.03    0.46
   0   4  -2    2.48    0.43
   0   4  -2    2.67    0.46
   0   4  -2    2.84    0.26
   0   4  -2    3.42    0.46
   0  -4   2    2.29    0.23
   0  -4   2    2.50    0.46
   0  -4   2    2.41    0.41
   0  -4   2    2.22    0.42
  -1   4  -2   27.61    1.76
  -1   4  -2   22.19    2.01
  -1   4  -2   27.48    2.14
  -1   4  -2   23.36    2.23
   1  -4   2   25.61    1.74
   1  -4   2   25.62    2.03
   1  -4   2   27.78    2.27
   1  -4   2   22.51    2.14
  -2   4  -2   23.67    1.90
  -2   4  -2   21.34    2.05
  -2   4  -2   21.51    1.82
  -2   4  -2   23.74    1.61
   2  -4   2   25.58    2.09
   2  -4   2   20.21    1.91
   2  -4   2   21.98    1.58
   2  -4   2   24.81    1.83
  -3   4  -2   67.62    5.76
  -3   4  -2   71.64    4.88
   3  -4   2   76.81    5.40
   3  -4   2   73.57    6.15
  -4   4  -2   11.14    0.90
   4  -4   2   12.94    1.03
   4  -4   2   11.01    1.21
  -5   4  -2    6.49    0.60
   5  -4   2    4.96    0.87
   5  -4   2    7.99    0.70
  -6   4  -2    0.06    0.16
   6  -4   2    0.10    0.19
   6  -4   2    0.00    0.28
  -7   4  -2    2.73    0.41
   7  -4   2    3.36    0.51
   7  -4   2    2.50    0.62
  -8   4  -2    0.49    0.22
   8  -4   2    0.26    0.27
   8  -4   2    0.37    0.35
  -9   4  -2    0.07    0.17
   9  -4   2    0.06    0.24
 -10   4  -2    6.99    0.71
 -10   4  -2    5.18    1.16
  10  -4   2    6.18    0.91
 -11   4  -2    0.32    0.28
 -11   4  -2   -0.29    0.61
  11  -4   2    0.23    0.39
 -12   4  -2    1.37    0.84
 -12   4  -2    1.92    0.41
  12  -4   2    1.49    0.59
 -13   4  -2   -0.10    0.77
 -13   4  -2   -0.20    0.21
  13  -4   2   -0.32    0.42
 -14   4  -2    4.76    1.22
 -14   4  -2    3.09    0.53
  14  -4   2    3.10    0.83
 -15   4  -2    1.27    0.92
 -15   4  -2   -0.30    0.23
  15  -4   2    0.18    0.44
 -16   4  -2    0.21    0.98
 -16   4  -2    0.30    0.26
  16  -4   2   -0.76    0.41
  17   3  -2    0.73    0.59
 -17  -3   2    1.36    0.94
  16   3  -2    0.28    0.56
 -16  -3   2    0.45    0.86
  15   3  -2    0.45    0.61
 -15  -3   2    0.89    0.90
  14   3  -2   -0.24    0.53
 -14  -3   2    0.25    0.68
  13   3  -2    0.98    0.52
  13   3  -2    0.33    0.54
 -13  -3   2    0.17    0.57
  12   3  -2    0.26    0.44
  12   3  -2    1.51    0.51
 -12  -3   2    0.70    0.56
 -12  -3   2    0.83    0.18
  11   3  -2   -0.12    0.35
  11   3  -2    0.04    0.36
 -11  -3   2   -0.08    0.12
 -11  -3   2    0.20    0.42
  10   3  -2    8.88    1.06
  10   3  -2    8.15    1.08
 -10  -3   2    8.58    1.36
 -10  -3   2    8.87    0.70
   9   3  -2    1.13    0.50
   9   3  -2    1.79    0.52
  -9  -3   2    1.61    0.54
  -9  -3   2    1.54    0.23
   8   3  -2   -0.09    0.25
   8   3  -2    0.69    0.40
  -8  -3   2    0.21    0.10
  -8  -3   2    0.69    0.38
   7   3  -2    8.07    1.08
   7   3  -2    7.35    0.89
  -7  -3   2    8.73    1.01
  -7  -3   2    7.30    0.58
   6   3  -2    5.51    0.75
   6   3  -2    5.67    0.83
  -6  -3   2    4.09    0.69
  -6  -3   2    4.91    0.38
   5   3  -2   15.73    1.29
   5   3  -2   13.68    1.38
  -5  -3   2   14.71    0.95
  -5  -3   2   12.55    1.35
  -5  -3   2   13.08    0.95
   4   3  -2   29.92    2.57
   4   3  -2   28.63    2.33
  -4  -3   2   25.67    2.51
  -4  -3   2   32.10    2.61
   3   3  -2   10.05    1.01
   3   3  -2   10.49    0.97
   3   3  -2   10.09    1.08
  -3  -3   2   10.63    1.05
  -3  -3   2   12.12    0.95
  -3  -3   2    9.43    1.03
   2   3  -2    0.52    0.27
   2   3  -2    1.23    0.26
  -2  -3   2    0.75    0.26
  -2  -3   2    1.25    0.29
   1   3  -2    2.21    0.19
   1   3  -2    2.39    0.37
   1   3  -2    2.34    0.41
   1   3  -2    2.93    0.42
  -1  -3   2    2.08    0.18
  -1  -3   2    1.90    0.37
  -1  -3   2    2.47    0.38
  -1  -3   2    2.38    0.40
   0   3  -2    2.74    0.39
   0   3  -2    2.47    0.38
   0   3  -2    2.30    0.37
   0   3  -2    2.46    0.21
   0  -3   2    1.79    0.35
   0  -3   2    2.31    0.37
   0  -3   2    2.30    0.37
   0  -3   2    1.97    0.19
  -1   3  -2   27.86    2.47
  -1   3  -2   26.74    2.20
  -1   3  -2   30.90    1.94
  -1   3  -2   28.91    2.36
   1  -3   2   25.05    2.36
   1  -3   2   28.07    2.20
   1  -3   2   27.72    1.93
   1  -3   2   31.05    2.50
  -2   3  -2   10.08    0.95
  -2   3  -2   10.79    1.07
  -2   3  -2   11.63    0.94
  -2   3  -2   12.03    0.82
   2  -3   2   11.92    0.93
   2  -3   2    9.51    0.97
   2  -3   2   11.56    1.10
   2  -3   2   11.02    0.80
  -3   3  -2    7.94    0.85
  -3   3  -2    7.64    0.72
  -3   3  -2    8.31    0.65
   3  -3   2    8.68    0.73
   3  -3   2    8.96    0.89
  -4   3  -2   17.45    1.28
   4  -3   2   15.90    1.67
   4  -3   2   19.24    1.43
  -5   3  -2    8.43    0.75
   5  -3   2    9.50    0.85
   5  -3   2   10.54    1.09
  -6   3  -2   10.12    0.83
   6  -3   2   11.12    1.21
   6  -3   2    9.30    0.93
  -7   3  -2   22.43    1.63
   7  -3   2   20.39    1.82
   7  -3   2   22.77    2.19
  -8   3  -2    3.39    0.48
   8  -3   2    3.21    0.74
   8  -3   2    3.82    0.61
  -9   3  -2    4.14    0.52
  -9   3  -2    1.78    0.75
   9  -3   2    3.84    0.65
 -10   3  -2    0.72    0.59
 -10   3  -2    1.30    0.31
  10  -3   2    1.41    0.45
 -11   3  -2    0.17    0.59
 -11   3  -2    0.52    0.28
  11  -3   2    0.55    0.42
 -12   3  -2   -0.49    0.21
 -12   3  -2    0.99    0.66
  12  -3   2   -0.29    0.36
 -13   3  -2    0.25    0.77
 -13   3  -2    0.29    0.28
  13  -3   2   -0.27    0.42
 -14   3  -2    0.76    0.29
 -14   3  -2    1.31    0.96
  14  -3   2    0.72    0.56
 -15   3  -2   -0.23    0.20
 -15   3  -2    0.97    0.97
  15  -3   2   -0.06    0.49
 -16   3  -2    3.71    0.56
 -16   3  -2    5.48    1.41
  16  -3   2    2.30    0.78
  17   2  -2    0.41    0.59
 -17  -2   2    1.83    0.95
  16   2  -2   -0.18    0.47
 -16  -2   2    0.77    0.94
  15   2  -2    0.60    0.55
 -15  -2   2    1.08    0.92
  14   2  -2   -0.44    0.49
 -14  -2   2    0.36    0.68
  13   2  -2    1.53    0.64
  13   2  -2    1.38    0.55
 -13  -2   2    1.55    0.26
 -13  -2   2    1.46    0.74
  12   2  -2    1.04    0.51
  12   2  -2    1.22    0.60
 -12  -2   2    1.27    0.25
 -12  -2   2    1.17    0.61
  11   2  -2   12.32    1.31
  11   2  -2   11.53    1.34
 -11  -2   2   11.84    1.51
 -11  -2   2   10.84    0.90
  10   2  -2   -0.09    0.28
  10   2  -2    0.53    0.39
 -10  -2   2    0.65    0.18
 -10  -2   2    0.77    0.48
   9   2  -2    2.   0.56
   9   2  -2    2.78    0.59
  -9  -2   2    2.27    0.30
  -9  -2   2    2.35    0.64
   8   2  -2    0.24    0.30
   8   2  -2    0.35    0.36
  -8  -2   2    0.67    0.39
  -8  -2   2    0.53    0.14
   7   2  -2    1.05    0.44
   7   2  -2    0.75    0.13
   7   2  -2    0.74    0.35
  -7  -2   2    0.88    0.41
  -7  -2   2    0.69    0.15
   6   2  -2   51.08    3.82
   6   2  -2   50.39    3.28
   6   2  -2   48.07    4.15
  -6  -2   2   47.80    3.28
  -6  -2   2   46.13    4.27
   5   2  -2    0.34    0.07
   5   2  -2    0.22    0.20
   5   2  -2    0.06    0.24
  -5  -2   2    0.24    0.21
  -5  -2   2    0.22    0.07
  -5  -2   2   -0.05    0.07
   4   2  -2   57.94    4.13
   4   2  -2   53.49    3.60
   4   2  -2   56.78    4.54
  -4  -2   2   51.57    4.51
  -4  -2   2   54.45    4.63
  -4  -2   2   51.51    3.59
   3   2  -2   25.67    2.29
   3   2  -2   26.27    2.06
  -3  -2   2   28.23    2.31
  -3  -2   2   24.32    2.27
  -3  -2   2   25.07    2.03
   2   2  -2   30.05    2.17
   2   2  -2   26.21    2.39
  -2  -2   2   24.22    2.37
  -2  -2   2   29.96    2.42
   1   2  -2   44.51    3.45
   1   2  -2   39.63    2.69
   1   2  -2   36.19    3.36
  -1  -2   2   44.38    3.46
  -1  -2   2   38.18    2.69
  -1  -2   2   35.90    3.35
  -1  -2   2   39.21    3.03
  -1  -2   2   47.02    3.10
   0   2  -2   24.75    1.58
   0   2  -2   24.43    1.82
   0   2  -2   20.91    1.97
   0   2  -2   25.28    2.05
   0  -2   2   23.69    1.57
   0  -2   2   19.16    1.96
   0  -2   2   22.29    1.81
   0  -2   2   25.52    2.05
  -1   2  -2   10.87    1.05
  -1   2  -2   11.18    0.92
  -1   2  -2   12.40    0.81
  -1   2  -2   10.37    1.01
   1  -2   2   11.40    0.92
   1  -2   2    9.72    1.02
   1  -2   2   12.43    1.08
   1  -2   2   12.02    0.80
  -2   2  -2   31.44    2.35
  -2   2  -2   32.06    2.12
  -2   2  -2   26.92    2.52
   2  -2   2   32.25    2.72
   2  -2   2   31.34    2.11
   2  -2   2   29.94    2.52
   2  -2   2   33.28    2.34
  -3   2  -2    6.66    0.53
  -3   2  -2    6.74    0.60
   3  -2   2    6.45    0.59
   3  -2   2    6.75    0.52
   3  -2   2    7.43    0.76
  -4   2  -2    1.03    0.18
   4  -2   2    1.57    0.35
   4  -2   2    1.16    0.22
  -5   2  -2    0.56    0.15
   5  -2   2    0.37    0.17
   5  -2   2    0.34    0.25
  -6   2  -2    3.47    0.41
   6  -2   2    2.68    0.59
   6  -2   2    3.57    0.51
  -7   2  -2    9.97    0.84
   7  -2   2    9.96    1.21
   7  -2   2    9.76    0.98
  -8   2  -2   19.83    1.53
   8  -2   2   21.33    1.80
  -9   2  -2   -0.15    0.44
  -9   2  -2    0.49    0.22
   9  -2   2    0.41    0.31
 -10   2  -2   -0.27    0.43
 -10   2  -2   -0.18    0.16
  10  -2   2   -0.37    0.24
 -11   2  -2   -0.34    0.15
 -11   2  -2    0.14    0.54
  11  -2   2    0.02    0.36
 -12   2  -2    2.52    0.78
 -12   2  -2    2.41    0.49
  12  -2   2    2.62    0.65
 -13   2  -2    9.80    0.95
 -13   2  -2    9.65    1.77
  13  -2   2   10.31    1.44
 -14   2  -2    0.71    0.34
 -14   2  -2    0.84    0.88
  14  -2   2   -0.10    0.48
 -15   2  -2    1.39    0.33
 -15   2  -2    4.85    1.26
  15  -2   2    1.55    0.67
 -16   2  -2    0.24    0.18
 -16   2  -2    0.33    0.83
  16  -2   2   -0.65    0.55
  17   1  -2    0.19    0.53
 -17  -1   2    1.47    0.89
  16   1  -2   -1.00    0.43
 -16  -1   2    0.00    0.79
  15   1  -2    1.27    0.66
 -15  -1   2    1.86    0.93
  14   1  -2    0.09    0.60
 -14  -1   2   -0.16    0.66
  13   1  -2    1.77    0.66
 -13  -1   2    1.04    0.71
 -13  -1   2    1.99    0.29
  12   1  -2    0.82    0.54
  12   1  -2    0.33    0.39
 -12  -1   2    0.23    0.59
 -12  -1   2    0.77    0.19
  11   1  -2    7.45    1.16
  11   1  -2    8.65    0.99
 -11  -1   2    7.60    0.69
 -11  -1   2    7.28    1.30
  10   1  -2   -0.04    0.28
  10   1  -2   -0.24    0.29
 -10  -1   2   -0.20    0.11
 -10  -1   2    0.16    0.40
   9   1  -2    0.68    0.36
   9   1  -2    1.02    0.44
  -9  -1   2    0.59    0.44
  -9  -1   2    1.17    0.22
   8   1  -2   10.75    1.14
   8   1  -2   10.93    1.24
  -8  -1   2   11.23    0.87
  -8  -1   2   12.67    1.37
   7   1  -2   17.22    1.20
   7   1  -2   16.84    1.51
   7   1  -2   16.89    1.65
  -7  -1   2   17.93    1.77
  -7  -1   2   15.48    1.20
   6   1  -2    0.19    0.31
   6   1  -2    0.20    0.25
   6   1  -2    0.60    0.11
  -6  -1   2    0.47    0.12
  -6  -1   2    0.10    0.24
  -6  -1   2    0.46    0.12
   5   1  -2    5.77    0.76
   5   1  -2    4.79    0.38
   5   1  -2    5.08    0.66
  -5  -1   2    4.76    0.38
  -5  -1   2    4.27    0.55
  -5  -1   2    5.57    0.66
   4   1  -2    7.36    0.84
   4   1  -2    8.43    0.73
   4   1  -2    7.45    0.54
  -4  -1   2    7.01    0.80
  -4  -1   2    7.28    0.54
  -4  -1   2    8.00    0.82
   3   1  -2    0.94    0.34
   3   1  -2    1.36    0.12
   3   1  -2    1.54    0.28
   3   1  -2    1.17    0.27
  -3  -1   2    0.91    0.27
  -3  -1   2    1.56    0.26
  -3  -1   2    1.17    0.33
  -3  -1   2    1.24    0.13
   2   1  -2    3.25    0.50
   2   1  -2    3.24    0.39
   2   1  -2    3.14    0.35
  -2  -1   2    3.51    0.50
  -2  -1   2    3.03    0.39
   1   1  -2    1.32    0.27
   1   1  -2    1.17    0.23
   1   1  -2    1.84    0.22
   1   1  -2    1.30    0.11
  -1  -1   2    1.47    0.28
  -1  -1   2    1.38    0.24
  -1  -1   2    1.61    0.18
  -1  -1   2    1.32    0.10
   0   1  -2  174.72   11.42
   0   1  -2  176.15   12.62
   0  -1   2  170.87   12.62
   0  -1   2  168.71   11.42
  -1   1  -2   10.41    0.72
  -1   1  -2    9.30    0.89
  -1   1  -2   10.27    0.80
   1  -1   2   10.00    0.89
   1  -1   2   10.58    0.79
   1  -1   2   10.35    0.71
   1  -1   2   10.53    0.95
  -2   1  -2    7.50    0.59
  -2   1  -2    6.56    0.72
  -2   1  -2    6.96    0.54
  -2   1  -2    7.29    0.63
   2  -1   2    7.42    0.61
   2  -1   2    6.54    0.53
   2  -1   2    7.76    0.59
   2  -1   2    7.79    0.75
  -3   1  -2    4.07    0.35
  -3   1  -2    4.18    0.39
  -3   1  -2    4.16    0.51
   3  -1   2    4.19    0.40
   3  -1   2    4.83    0.55
  -4   1  -2    9.56    0.77
  -4   1  -2   11.47    0.87
   4  -1   2    9.80    1.06
   4  -1   2   11.00    0.89
   4  -1   2   10.04    0.76
  -5   1  -2    2.68    0.33
   5  -1   2    2.98    0.55
   5  -1   2    2.96    0.41
  -6   1  -2    7.78    0.67
   6  -1   2    8.02    0.99
   6  -1   2    8.54    0.81
  -7   1  -2   23.96    1.74
   7  -1   2   23.80    2.35
   7  -1   2   24.32    2.01
  -8   1  -2    0.27    0.17
   8  -1   2    0.14    0.10
   8  -1   2    0.22    0.29
  -9   1  -2   -0.11    0.14
  -9   1  -2   -0.36    0.41
   9  -1   2   -0.17    0.24
   9  -1   2   -0.07    0.09
 -10   1  -2   10.29    0.88
 -10   1  -2    7.71    1.36
  10  -1   2   10.12    0.87
  10  -1   2   10.65    1.12
 -11   1  -2    6.17    1.28
 -11   1  -2    8.44    0.76
  11  -1   2    7.60    0.68
  11  -1   2    8.07    1.14
 -12   1  -2    2.28    0.93
[truncated: 2,236,528 more chars]
